# Supplementary material for: Activated Expression of Rice DMR6-like Gene OsS3H Partially Explores the Susceptibility to Bacterial Leaf Streak Mediated by Knock-Out OsF3H04g
Source: Int J Mol Sci. 2023 Aug 26;24(17):13263. doi: 10.3390/ijms241713263 (PMC10487387; doi:10.3390/ijms241713263)
Supplement: Supplementary file 1 [file ijms-24-13263-s001.zip › 04g-IJMS-Table S1-4.xlsx]

## Sheet: Table S1
Table S1. The differentially expresssed genes (DEGs) in osf3h04g.
msu_id	Means-DJ	Means-osf3h04g	log2(osf3h04g/DJ)	P value	GO Component	GO Function	GO Process	KEGG Orthology	msu_description
LOC_Os11g41780	0.035	39.67	10.1465	1	-	-	-	-	cDNA|transposon protein, putative, CACTA, En/Spm sub-class, expressed
LOC_Os03g02470	0.04	24.005	9.22912	1	-	-	-	-	cDNA|expressed protein
LOC_Os09g19350	0.01	5.355	9.06474	1	GO:0031410//cytoplasmic vesicle	-	-	K04733|1|0.0|651|zma:103632620|interleukin-1 receptor-associated kinase 4 [EC:2.7.11.1]	cDNA|expressed protein
LOC_Os03g43100	0.01	5.01	8.96867	1	GO:0043231//intracellular membrane-bounded organelle	-	-	-	cDNA|expressed protein
LOC_Os04g22870	0.01	4.98	8.96	1	-	-	-	K03537|1|2e-69|262|dosa:Os05t0270500-01|ribonuclease P/MRP protein subunit POP5 [EC:3.1.26.5]	cDNA|rpp14 family protein, expressed
LOC_Os11g08230	0.01	4.045	8.66	1	GO:0043231//intracellular membrane-bounded organelle;GO:0043231//intracellular membrane-bounded organelle;GO:0043231//intracellular membrane-bounded organelle;GO:0043231//intracellular membrane-bounded organelle;GO:0043231//intracellular membrane-bounded organelle	-	-	-	cDNA|DEFL46 - Defensin and Defensin-like DEFL family, expressed
LOC_Os07g01960	0.08	30.175	8.55914	1	-	-	-	K21027|1|2e-11|73.9|tcc:TCM_040691|tRNA-5-taurinomethyluridine 2-sulfurtransferase [EC:2.8.1.14];K08150|2|8e-08|62.0|ats:F775_21080|MFS transporter, SP family, solute carrier family 2 (myo-inositol transporter), member 13;K04040|3|2e-06|57.4|ats:F775_00026|chlorophyll/bacteriochlorophyll a synthase [EC:2.5.1.62 2.5.1.133];K18213|4|1e-05|55.1|ats:F775_10260|proteinaceous RNase P [EC:3.1.26.5]	cDNA|hypothetical protein
LOC_Os04g49210	0.215	73.25	8.41235	1	-	GO:0003824//catalytic activity;GO:0003824//catalytic activity	GO:0008152//metabolic process;GO:0008152//metabolic process	K00475|1|1e-49|199|sita:101777126|naringenin 3-dioxygenase [EC:1.14.11.9];K05278|2|8e-49|196|nnu:104596714|flavonol synthase [EC:1.14.11.23]	cDNA|naringenin,2-oxoglutarate 3-dioxygenase, putative, expressed
LOC_Os09g30412	0.01	3.205	8.32418	1	GO:0044424;GO:0044424	GO:0005515//protein binding;GO:0032559//adenyl ribonucleotide binding;GO:0005515//protein binding;GO:0032559//adenyl ribonucleotide binding	GO:0044267//cellular protein metabolic process;GO:0050896//response to stimulus;GO:0044267//cellular protein metabolic process;GO:0050896//response to stimulus	K04079|1|0.0|1214|dosa:Os09t0482600-01|molecular chaperone HtpG	cDNA|heat shock protein, putative, expressed
LOC_Os03g21964	0.025	3.635	7.18388	1	-	-	-	-	cDNA|expressed protein
LOC_Os07g01580	0.01	1.36	7.08746	1	GO:0043231//intracellular membrane-bounded organelle	-	-	-	cDNA|expressed protein
LOC_Os05g23950	0.01	1.205	6.91289	1	-	GO:0046914//transition metal ion binding;GO:0019787//ubiquitin-like protein transferase activity	GO:0032446//protein modification by small protein conjugation	K12501|1|0.0|662|dosa:Os04t0218900-01|homogentisate solanesyltransferase [EC:2.5.1.117]	cDNA|TRAF-type zinc finger family protein, expressed
LOC_Os07g28970	0.01	1.19	6.89482	0.998522	GO:0043231//intracellular membrane-bounded organelle;GO:0043231//intracellular membrane-bounded organelle;GO:0043231//intracellular membrane-bounded organelle	-	-	-	cDNA|retrotransposon, putative, centromere-specific, expressed
LOC_Os07g44440	0.01	1.135	6.82655	1	GO:0043231//intracellular membrane-bounded organelle	GO:0016705//oxidoreductase activity, acting on paired donors, with incorporation or reduction of molecular oxygen;GO:0016209//antioxidant activity	GO:0008152//metabolic process;GO:0019725//cellular homeostasis	K11188|1|8e-119|427|dosa:Os07t0638400-01|peroxiredoxin 6, 1-Cys peroxiredoxin [EC:1.11.1.7 1.11.1.15 3.1.1.-]	cDNA|peroxiredoxin, putative, expressed
LOC_Os11g41780	0.025	2.08	6.37851	1	-	-	-	K14300|1|2e-35|152|pda:103721930|nuclear pore complex protein Nup133;K17913|2|5e-32|141|thj:104820078|carlactone synthase / all-trans-10'-apo-beta-carotenal 13,14-cleaving dioxygenase [EC:1.13.11.69 1.13.11.70];K18674|3|5e-11|71.6|vra:106763568|N-acetylgalactosamine kinase [EC:2.7.1.157];K03013|4|3e-10|69.3|cit:102620712|DNA-directed RNA polymerases I, II, and III subunit RPABC1	cDNA|transposon protein, putative, CACTA, En/Spm sub-class, expressed
LOC_Os01g25484	0.095	5.41	5.83156	1	GO:0043231//intracellular membrane-bounded organelle	GO:0051540;GO:0005506//iron ion binding;GO:0003824//catalytic activity	GO:0008152//metabolic process	K00366|1|0.0|1074|osa:4326014|ferredoxin-nitrite reductase [EC:1.7.7.1]	cDNA|ferredoxin--nitrite reductase, putative, expressed
LOC_Os12g02210	0.16	9.055	5.82257	1	GO:0031410//cytoplasmic vesicle	GO:0046872//metal ion binding	-	K19038|1|1e-07|58.5|fve:101301022|E3 ubiquitin-protein ligase ATL41 [EC:2.3.2.27];K19039|2|1e-06|55.5|jcu:105640104|E3 ubiquitin-protein ligase ATL7/58/59 [EC:2.3.2.27];K10664|5|3e-06|54.3|ppp:PHYPADRAFT_48685|E3 ubiquitin-protein ligase ATL6/9/15/31/42/55 [EC:2.3.2.27]	cDNA|RING finger protein, putative, expressed
LOC_Os03g14630	0.465	25.54	5.77938	1	GO:0031410//cytoplasmic vesicle	-	-	-	cDNA|LTPL106 - Protease inhibitor/seed storage/LTP family protein precursor, expressed
LOC_Os11g02250	0.115	5.15	5.48487	1	GO:0031410//cytoplasmic vesicle	-	-	K19038|1|2e-09|61.6|vra:106754212|E3 ubiquitin-protein ligase ATL41 [EC:2.3.2.27]	cDNA|zinc finger, C3HC4 type domain containing protein, expressed
LOC_Os07g04930	1.575	69.735	5.46846	1	GO:0043231//intracellular membrane-bounded organelle;GO:0031410//cytoplasmic vesicle	-	-	-	cDNA|retrotransposon protein, putative, unclassified, expressed
LOC_Os01g42210	0.05	1.95	5.2854	0.998683	GO:0031410//cytoplasmic vesicle	-	-	-	cDNA|LTPL47 - Protease inhibitor/seed storage/LTP family protein precursor, putative, expressed
LOC_Os06g39400	0.06	2.235	5.21917	0.998525	-	-	-	K02575|1|9e-40|166|ats:F775_13785|MFS transporter, NNP family, nitrate/nitrite transporter;K02540|2|2e-28|96.3|ats:F775_32209|DNA replication licensing factor MCM2 [EC:3.6.4.12];K05909|4|2e-19|85.1|bna:106441311|laccase [EC:1.10.3.2]	cDNA|retrotransposon protein, putative, unclassified, expressed
LOC_Os01g72370	1.7	63.17	5.21563	1	GO:0043231//intracellular membrane-bounded organelle;GO:0043231//intracellular membrane-bounded organelle;GO:0043231//intracellular membrane-bounded organelle;GO:0043231//intracellular membrane-bounded organelle	-	-	K18486|1|2e-23|112|csv:101220763|heart-and neural crest derivatives-expressed protein 2	cDNA|helix-loop-helix DNA-binding domain containing protein, expressed
LOC_Os04g58050	0.095	3.25	5.09637	0.999012	-	-	-	-	cDNA|expressed protein
LOC_Os11g11220	0.09	2.99	5.05408	0.997959	-	-	-	-	cDNA|transposon protein, putative, unclassified, expressed
LOC_Os03g01500	0.175	5.495	4.97269	1	GO:0043231//intracellular membrane-bounded organelle	-	-	-	cDNA|hypothetical protein
LOC_Os07g15460	2.185	64.585	4.88549	1	GO:0044464;GO:0044464;GO:0044464;GO:0044464	-	GO:0051234//establishment of localization;GO:0051234//establishment of localization;GO:0051234//establishment of localization;GO:0051234//establishment of localization	K03322|1|0.0|946|dosa:Os07t0258400-01|manganese transport protein;K12347|3|0.0|722|zma:103647319|natural resistance-associated macrophage protein	cDNA|metal transporter Nramp6, putative, expressed
LOC_Os01g15740	0.075	2.135	4.8312	1	-	-	-	-	cDNA|expressed protein
LOC_Os04g49194	0.075	1.805	4.58896	0.996949	-	-	-	K00475|1|9e-60|232|mdm:103436139|naringenin 3-dioxygenase [EC:1.14.11.9]	cDNA|naringenin,2-oxoglutarate 3-dioxygenase, putative, expressed
LOC_Os06g41640	0.115	2.71	4.55859	1	-	-	-	K15078|1|3e-70|268|pop:POPTR_0005s14950g|structure-specific endonuclease subunit SLX1 [EC:3.6.1.-]	cDNA|CC-NBS-LRR protein, putative, expressed
LOC_Os02g43370	1.715	37.195	4.43883	1	GO:0044464;GO:0044464;GO:0044464	-	GO:0006810//transport;GO:0006810//transport;GO:0006810//transport	K01807|1|3e-06|55.8|nnu:104595031|ribose 5-phosphate isomerase A [EC:5.3.1.6]	cDNA|transposon protein, putative, unclassified, expressed
LOC_Os10g11889	1.99	42.195	4.40623	1	-	-	-	-	cDNA|expressed protein
LOC_Os12g05220	0.16	3.13	4.29002	1	GO:0043231//intracellular membrane-bounded organelle	-	-	-	cDNA|expressed protein
LOC_Os01g72360	0.51	9.95	4.28613	1	-	-	-	-	cDNA|expressed protein
LOC_Os06g15620	0.515	9.365	4.18463	1	-	-	-	K03860|1|9e-28|124|nnu:104608881|phosphatidylinositol glycan, class Q;K20887|2|1e-09|64.3|mdm:103411342|xyloglucan glycosyltransferase 4 [EC:2.4.1.-]	cDNA|GASR7 - Gibberellin-regulated GASA/GAST/Snakin family protein precursor, expressed
LOC_Os06g34730	0.455	8.14	4.16109	1	-	-	-	-	cDNA|expressed protein
LOC_Os06g03200	0.36	5.64	3.96963	1	GO:0043231//intracellular membrane-bounded organelle;GO:0043231//intracellular membrane-bounded organelle;GO:0043231//intracellular membrane-bounded organelle;GO:0043231//intracellular membrane-bounded organelle;GO:0043231//intracellular membrane-bounded organelle;GO:0043231//intracellular membrane-bounded organelle;GO:0043231//intracellular membrane-bounded organelle	-	-	-	cDNA|expressed protein
LOC_Os01g03030	2.745	39.535	3.84825	1	GO:0044424	GO:0004812//aminoacyl-tRNA ligase activity;GO:0032559//adenyl ribonucleotide binding	GO:0006418//tRNA aminoacylation for protein translation	K01872|1|1e-07|58.9|vcn:VOLCADRAFT_120886|alanyl-tRNA synthetase [EC:6.1.1.7]	cDNA|alanyl-tRNA synthetase, putative, expressed
LOC_Os08g29615	0.205	2.915	3.8298	1	-	-	-	-	cDNA|expressed protein
LOC_Os11g15624	2.87	36.575	3.67174	1	-	-	-	-	cDNA|expressed protein
LOC_Os03g20680	0.285	3.25	3.51141	0.998644	GO:0043231//intracellular membrane-bounded organelle	-	-	-	cDNA|late embryogenesis abundant protein 1, putative, expressed
LOC_Os07g26100	0.13	1.455	3.48444	0.998006	-	-	-	-	cDNA|expressed protein
LOC_Os05g27820	0.14	1.42	3.34239	1	GO:0031224//intrinsic component of membrane;GO:0043231//intracellular membrane-bounded organelle	-	GO:0051234//establishment of localization	K19996|1|3e-113|410|zma:103655821|phosphatidylinositol transfer protein SFH5	cDNA|patellin protein, putative, expressed
LOC_Os01g71210	0.21	2.075	3.30465	1	GO:0043231//intracellular membrane-bounded organelle	-	-	-	cDNA|expressed protein
LOC_Os01g35330	4.52	41.76	3.20773	1	-	-	-	-	cDNA|circumsporozoite protein precursor, putative, expressed
LOC_Os04g14690	2.89	24.755	3.09858	1	GO:0005789//endoplasmic reticulum membrane	GO:0016709//oxidoreductase activity, acting on paired donors, with incorporation or reduction of molecular oxygen, NAD(P)H as one donor, and incorporation of one atom of oxygen;GO:0050662//coenzyme binding;GO:0000166//nucleotide binding	GO:0008152//metabolic process	K00485|1|0.0|1053|dosa:Os04t0223500-01|dimethylaniline monooxygenase (N-oxide forming) [EC:1.14.13.8]	cDNA|flavin-containing monooxygenase family protein, putative, expressed
LOC_Os04g17660	8.885	71.405	3.00658	1	-	-	-	K15692|1|3e-27|124|nnu:104590046|E3 ubiquitin-protein ligase RNF13 [EC:2.3.2.27]	cDNA|rhodanese-like domain containing protein, putative, expressed
LOC_Os01g63380	0.345	2.7	2.96829	1	-	-	-	K17604|1|0.0|878|dosa:Os01t0852650-00|zinc finger SWIM domain-containing protein 3	cDNA|transposon protein, putative, unclassified, expressed
LOC_Os03g60560	0.205	1.545	2.91391	1	GO:0043231//intracellular membrane-bounded organelle	-	-	-	cDNA|ZOS3-21 - C2H2 zinc finger protein, expressed
LOC_Os09g30438	0.25	1.785	2.83592	0.997689	-	-	-	-	cDNA|expressed protein
LOC_Os12g18360	0.225	1.57	2.80277	1	GO:0043231//intracellular membrane-bounded organelle;GO:0043231//intracellular membrane-bounded organelle	-	-	K13457|1|3e-87|325|bdi:100824945|disease resistance protein RPM1	cDNA|NB-ARC domain containing protein, expressed
LOC_Os03g26210	10.29	66.625	2.69482	1	GO:0043231//intracellular membrane-bounded organelle;GO:0043231//intracellular membrane-bounded organelle	-	-	-	cDNA|helix-loop-helix DNA-binding domain containing protein, expressed
LOC_Os03g51530	12.235	77.66	2.66616	1	-	-	-	-	cDNA|expressed protein
LOC_Os02g06230	0.735	4.66	2.66451	1	-	-	-	K03517|1|3e-62|241|zma:100279087|quinolinate synthase [EC:2.5.1.72];K03006|2|1e-46|189|adu:107466525|DNA-directed RNA polymerase II subunit RPB1 [EC:2.7.7.6];K07739|3|3e-45|184|gra:105803458|elongator complex protein 3 [EC:2.3.1.48];K04733|4|2e-41|171|thj:104800668|interleukin-1 receptor-associated kinase 4 [EC:2.7.11.1];K12447|5|4e-40|167|thj:104808371|UDP-sugar pyrophosphorylase [EC:2.7.7.64]	cDNA|retrotransposon protein, putative, unclassified, expressed
LOC_Os11g29840	0.18	1.135	2.65662	0.997809	-	-	-	-	cDNA|expressed protein
LOC_Os09g22090	0.535	3.365	2.653	0.999442	-	GO:0016861//intramolecular oxidoreductase activity, interconverting aldoses and ketoses;GO:0046914//transition metal ion binding	GO:0044238//primary metabolic process	K01809|1|7e-168|592|sita:101763679|mannose-6-phosphate isomerase [EC:5.3.1.8]	cDNA|mannose-6-phosphate isomerase, putative, expressed
LOC_Os06g30179	0.18	1.07	2.57154	0.960471	-	-	-	-	cDNA|cytochrome P450, putative, expressed
LOC_Os09g28210	1.405	7.925	2.49584	1	GO:0043231//intracellular membrane-bounded organelle	-	-	K10863|1|3e-07|57.8|thj:104816650|aprataxin [EC:3.-.-.-]	cDNA|bHelix-loop-helix transcription factor, putative, expressed
LOC_Os12g43450	0.745	4.015	2.43009	0.998244	GO:0031410//cytoplasmic vesicle	-	-	K04733|1|1e-55|217|ats:F775_00388|interleukin-1 receptor-associated kinase 4 [EC:2.7.11.1]	cDNA|thaumatin family domain containing protein, expressed
LOC_Os04g48930	3.43	18.185	2.40647	1	-	-	-	K13411|1|5e-24|111|nnu:104596257|dual oxidase [EC:1.6.3.1 1.11.1.-]	cDNA|ferric-chelate reductase, putative, expressed
LOC_Os12g05290	2.33	11.72	2.33057	1	-	-	-	K12447|1|1e-130|469|thj:104808371|UDP-sugar pyrophosphorylase [EC:2.7.7.64];K07305|4|6e-126|454|cit:102619922|peptide-methionine (R)-S-oxide reductase [EC:1.8.4.12];K01528|5|1e-125|452|lja:Lj0g3v0199559.2|dynamin GTPase [EC:3.6.5.5]	cDNA|retrotransposon protein, putative, unclassified, expressed
LOC_Os08g38800	0.565	2.765	2.29096	1	GO:0043231//intracellular membrane-bounded organelle	-	-	K05283|1|6e-24|114|ats:F775_00441|phosphatidylinositol glycan, class W [EC:2.3.-.-];K08472|2|3e-23|112|ats:F775_25494|mlo protein;K01601|3|3e-18|95.5|sind:105173773|ribulose-bisphosphate carboxylase large chain [EC:4.1.1.39];K01247|4|4e-17|91.7|sita:101783346|DNA-3-methyladenine glycosylase II [EC:3.2.2.21];K14664|5|9e-12|73.9|pxb:108868300|IAA-amino acid hydrolase [EC:3.5.1.-]	cDNA|retrotransposon protein, putative, unclassified, expressed
LOC_Os09g03040	0.57	2.73	2.25987	0.99727	-	-	-	-	cDNA|transposon protein, putative, CACTA, En/Spm sub-class, expressed
LOC_Os04g03980	0.475	2.22	2.22456	0.998742	-	GO:0000166//nucleotide binding;GO:0050662//coenzyme binding;GO:0016709//oxidoreductase activity, acting on paired donors, with incorporation or reduction of molecular oxygen, NAD(P)H as one donor, and incorporation of one atom of oxygen	GO:0008152//metabolic process	K11816|1|0.0|816|dosa:Os04t0128900-01|indole-3-pyruvate monooxygenase [EC:1.14.13.168]	cDNA|flavin monooxygenase, putative, expressed
LOC_Os10g28680	0.25	1.16	2.21412	0.991734	-	-	-	-	cDNA|DUF581 domain containing protein, expressed
LOC_Os09g27750	24.14	110.975	2.20074	1	-	GO:0003824//catalytic activity	GO:0008152//metabolic process	K05933|1|2e-172|606|dosa:Os09t0451000-01|aminocyclopropanecarboxylate oxidase [EC:1.14.17.4]	cDNA|1-aminocyclopropane-1-carboxylate oxidase 1, putative, expressed
LOC_Os12g43490	0.23	1.045	2.1838	0.988811	GO:0031410//cytoplasmic vesicle	-	-	K04733|1|3e-59|229|ats:F775_00388|interleukin-1 receptor-associated kinase 4 [EC:2.7.11.1]	cDNA|thaumatin, putative, expressed
LOC_Os04g44500	0.33	1.495	2.17961	0.989431	-	-	-	K04733|1|1e-21|105|ats:F775_18549|interleukin-1 receptor-associated kinase 4 [EC:2.7.11.1];K03868|2|6e-11|69.7|gmx:100792815|RING-box protein 1	cDNA|GEM, putative, expressed
LOC_Os01g42780	0.39	1.74	2.15754	0.999005	-	GO:0004175//endopeptidase activity	GO:0019538//protein metabolic process	K01365|1|6e-91|335|bdi:100842032|cathepsin L [EC:3.4.22.15]	cDNA|cysteine proteinase EP-B 2 precursor, putative, expressed
LOC_Os03g51600	60.44	269.535	2.1569	1	GO:0032991//macromolecular complex;GO:0015630//microtubule cytoskeleton	GO:0017111//nucleoside-triphosphatase activity;GO:0032561//guanyl ribonucleotide binding	GO:0043623//cellular protein complex assembly;GO:0009207;GO:0007017//microtubule-based process	K07374|1|0.0|850|dosa:Os03t0726100-01|tubulin alpha	cDNA|tubulin/FtsZ domain containing protein, putative, expressed
LOC_Os10g33490	0.25	1.11	2.15056	0.997055	-	-	-	-	cDNA|expressed protein
LOC_Os01g65110	22.315	95.24	2.09355	1	GO:0044464	-	GO:0015833//peptide transport	K14638|1|0.0|978|dosa:Os01t0871500-01|solute carrier family 15 (peptide/histidine transporter), member 3/4	cDNA|POT family protein, expressed
LOC_Os07g40860	0.46	1.96	2.09115	0.989737	-	-	-	-	cDNA|retrotransposon protein, putative, unclassified, expressed
LOC_Os11g19240	0.645	2.69	2.06024	0.997978	GO:0016020//membrane	-	-	K15015|1|3e-132|473|rcu:8262267|solute carrier family 32 (vesicular inhibitory amino acid transporter)	cDNA|transmembrane amino acid transporter protein, putative, expressed
LOC_Os06g16240	1.345	5.56	2.04748	1	-	-	-	K16573|1|6e-18|93.6|pda:103722329|gamma-tubulin complex component 6	cDNA|expressed protein
LOC_Os01g43280	0.255	1.04	2.02801	0.993937	-	GO:0016757//transferase activity, transferring glycosyl groups	-	K08237|1|0.0|799|dosa:Os01t0620800-01|hydroquinone glucosyltransferase [EC:2.4.1.218]	cDNA|hydroquinone glucosyltransferase, putative, expressed
LOC_Os01g01290	0.34	1.35	1.98935	0.980034	-	-	-	K08066|1|0.0|804|osa:4326467|nuclear transcription factor Y, gamma	cDNA|histone-like transcription factor and archaeal histone, putative, expressed
LOC_Os09g24350	0.295	1.17	1.98772	0.989322	GO:0031410//cytoplasmic vesicle	-	-	-	cDNA|THION32 - Plant thionin family protein precursor, expressed
LOC_Os01g18860	2.69	10.58	1.97566	1	GO:0044424;GO:0044424	GO:0046872//metal ion binding;GO:0016765//transferase activity, transferring alkyl or aryl (other than methyl) groups;GO:0032559//adenyl ribonucleotide binding;GO:0046872//metal ion binding;GO:0016765//transferase activity, transferring alkyl or aryl (other than methyl) groups;GO:0032559//adenyl ribonucleotide binding	GO:0044237//cellular metabolic process;GO:0044237//cellular metabolic process	K00789|1|0.0|778|dosa:Os01t0293000-01|S-adenosylmethionine synthetase [EC:2.5.1.6]	cDNA|S-adenosylmethionine synthetase, putative, expressed
LOC_Os07g33997	0.3	1.16	1.95109	0.924887	GO:0043231//intracellular membrane-bounded organelle;GO:0030529//intracellular ribonucleoprotein complex	GO:0005198//structural molecule activity	GO:0010467//gene expression	K02929|1|5e-67|254|osa:4343415|large subunit ribosomal protein L44e	cDNA|60S ribosomal protein L44, putative, expressed
LOC_Os07g29750	0.575	2.185	1.926	0.998266	GO:0005576//extracellular region;GO:0031410//cytoplasmic vesicle;GO:0030312//external encapsulating structure	GO:0016798//hydrolase activity, acting on glycosyl bonds;GO:0016758//transferase activity, transferring hexosyl groups	GO:0044042//glucan metabolic process	K08235|1|4e-164|579|dosa:Os07t0480800-01|xyloglucan:xyloglucosyl transferase [EC:2.4.1.207]	cDNA|glycosyl hydrolases family 16, putative, expressed
LOC_Os06g36450	4.83	18.34	1.9249	1	GO:0016020//membrane;GO:0044464	-	GO:0006826//iron ion transport	K14685|1|0.0|673|dosa:Os06t0560000-01|solute carrier family 40 (iron-regulated transporter), member 1	cDNA|ferroportin1 domain containing protein, expressed
LOC_Os08g05980	0.355	1.31	1.88368	0.984353	GO:0043231//intracellular membrane-bounded organelle;GO:0031410//cytoplasmic vesicle	-	-	-	cDNA|expressed protein
LOC_Os04g02620	13.825	50.225	1.86113	1	-	-	-	K10251|1|1e-117|424|obr:102712982|17beta-estradiol 17-dehydrogenase / very-long-chain 3-oxoacyl-CoA reductase [EC:1.1.1.62 1.1.1.330]	cDNA|oxidoreductase, short chain dehydrogenase/reductase family, putative, expressed
LOC_Os05g45450	0.425	1.525	1.84327	0.986175	-	-	-	-	cDNA|DUF584 domain containing protein, putative, expressed
LOC_Os11g44750	0.37	1.325	1.8404	0.99047	GO:0043231//intracellular membrane-bounded organelle	-	-	K13993|1|1e-67|258|sita:101764644|HSP20 family protein	cDNA|retrotransposon protein, putative, unclassified, expressed
LOC_Os03g01200	12.055	43.065	1.83688	1	-	-	-	K20092|1|0.0|1712|osa:4331290|chromodomain-helicase-DNA-binding protein 1-like [EC:3.6.4.12]	cDNA|SNF2 family N-terminal domain containing protein, expressed
LOC_Os07g38130	1.14	4.065	1.83422	0.993827	GO:0031410//cytoplasmic vesicle	GO:0030234//enzyme regulator activity	GO:0003006//developmental process involved in reproduction	K01188|1|5e-51|203|ats:F775_10158|beta-glucosidase [EC:3.2.1.21];K20718|4|1e-32|142|ats:F775_17157|LRR receptor-like serine/threonine-protein kinase ERECTA [EC:2.7.11.1]	cDNA|polygalacturonase inhibitor 1 precursor, putative, expressed
LOC_Os01g39860	0.635	2.215	1.80248	0.996612	-	-	-	K05933|1|2e-149|530|dosa:Os01t0580500-01|aminocyclopropanecarboxylate oxidase [EC:1.14.17.4]	cDNA|1-aminocyclopropane-1-carboxylate oxidase protein, putative, expressed
LOC_Os08g05970	0.34	1.18	1.79518	0.988015	GO:0043231//intracellular membrane-bounded organelle;GO:0031410//cytoplasmic vesicle	-	-	-	cDNA|expressed protein
LOC_Os10g21352	9.025	31.145	1.787	0.989376	GO:0000315//organellar large ribosomal subunit;GO:0009536//plastid	GO:0003676//nucleic acid binding;GO:0003824//catalytic activity;GO:0005198//structural molecule activity	GO:0010467//gene expression	K02886|1|4e-145|515|osa:107278854|large subunit ribosomal protein L2	cDNA|chloroplast 30S ribosomal protein S19, putative, expressed
LOC_Os01g46720	42.48	142.515	1.74626	1	GO:0009536//plastid	GO:0016301//kinase activity;GO:0032559//adenyl ribonucleotide binding	GO:0006464//cellular protein modification process	-	cDNA|expressed protein
LOC_Os03g12820	0.575	1.925	1.74322	0.99672	-	-	-	-	cDNA|ATP8, putative, expressed
LOC_Os07g18080	0.37	1.23	1.73306	0.989992	-	-	-	K13681|1|9e-42|173|ats:F775_18834|xyloglucan fucosyltransferase [EC:2.4.1.-];K18674|2|3e-36|155|vra:106763568|N-acetylgalactosamine kinase [EC:2.7.1.157];K17913|3|2e-20|102|thj:104820078|carlactone synthase / all-trans-10'-apo-beta-carotenal 13,14-cleaving dioxygenase [EC:1.13.11.69 1.13.11.70];K03013|4|1e-18|97.1|cit:102620712|DNA-directed RNA polymerases I, II, and III subunit RPABC1;K14300|5|5…	cDNA|transposon protein, putative, CACTA, En/Spm sub-class, expressed
LOC_Os02g01355	0.43	1.425	1.72855	0.995641	GO:0043231//intracellular membrane-bounded organelle;GO:0043231//intracellular membrane-bounded organelle	GO:0003677//DNA binding;GO:0001071//nucleic acid binding transcription factor activity;GO:0003677//DNA binding;GO:0001071//nucleic acid binding transcription factor activity	GO:0006351//transcription, DNA-templated;GO:0006351//transcription, DNA-templated	K09260|1|9e-38|159|adu:107485538|MADS-box transcription enhancer factor 2A	cDNA|MADS-box transcription factor, putative, expressed
LOC_Os05g51470	5.405	17.79	1.7187	1	-	GO:0016702//oxidoreductase activity, acting on single donors with incorporation of molecular oxygen, incorporation of two atoms of oxygen	GO:0008152//metabolic process	K10712|1|2e-161|570|dosa:Os05t0592300-01|cysteamine dioxygenase [EC:1.13.11.19]	cDNA|2-aminoethanethiol dioxygenase, putative, expressed
LOC_Os09g27820	1.965	6.46	1.717	0.997605	-	GO:0003824//catalytic activity	GO:0008152//metabolic process	K05933|1|2e-172|606|dosa:Os09t0451400-01|aminocyclopropanecarboxylate oxidase [EC:1.14.17.4]	cDNA|1-aminocyclopropane-1-carboxylate oxidase protein, putative, expressed
LOC_Os03g19090	1.055	3.45	1.70935	1	-	-	-	-	cDNA|expressed protein
LOC_Os03g52680	37.875	122.305	1.69117	1	-	-	-	-	cDNA|expressed protein
LOC_Os03g03810	0.42	1.355	1.68983	0.995991	GO:0031410//cytoplasmic vesicle	-	-	-	cDNA|DEF8 - Defensin and Defensin-like DEFL family, expressed
LOC_Os02g01590	3.04	9.77	1.68429	1	-	GO:0004558//alpha-1,4-glucosidase activity	GO:0044238//primary metabolic process	K01193|1|0.0|1276|dosa:Os02t0106100-01|beta-fructofuranosidase [EC:3.2.1.26]	cDNA|glycosyl hydrolases, putative, expressed
LOC_Os02g46830	0.87	2.78	1.676	0.993856	-	-	-	-	cDNA|expressed protein
LOC_Os05g05620	0.645	2.04	1.6612	0.964376	GO:0031410//cytoplasmic vesicle	GO:0016765//transferase activity, transferring alkyl or aryl (other than methyl) groups	-	K00799|1|1e-72|272|dosa:Os05t0148900-01|glutathione S-transferase [EC:2.5.1.18]	cDNA|glutathione S-transferase, putative, expressed
LOC_Os05g43880	0.405	1.265	1.64314	0.998308	-	-	-	K04125|1|0.0|649|osa:4339310|gibberellin 2-oxidase [EC:1.14.11.13]	cDNA|gibberellin 2-beta-dioxygenase, putative, expressed
LOC_Os02g15860	13.915	43.405	1.64122	1	-	-	-	-	cDNA|expressed protein
LOC_Os03g54130	1.575	4.88	1.63153	1	GO:0031410//cytoplasmic vesicle;GO:0043231//intracellular membrane-bounded organelle	GO:0070011//peptidase activity, acting on L-amino acid peptides	-	K01365|1|1e-113|411|bdi:100822378|cathepsin L [EC:3.4.22.15];K16292|2|2e-85|317|bdi:100843107|KDEL-tailed cysteine endopeptidase [EC:3.4.22.-]	cDNA|cysteine protease 1 precursor, putative, expressed
LOC_Os09g04384	0.715	2.19	1.61492	0.998663	-	-	-	K13162|1|2e-12|78.2|thj:104822353|poly(rC)-binding protein 2/3/4	cDNA|expressed protein
LOC_Os02g36880	0.665	2.03	1.61005	0.996809	GO:0043231//intracellular membrane-bounded organelle;GO:0043231//intracellular membrane-bounded organelle	-	-	K12581|1|6e-20|100|bna:106383523|CCR4-NOT transcription complex subunit 7/8;K13126|2|3e-17|91.3|fve:101312606|polyadenylate-binding protein;K01054|3|2e-14|81.6|bna:106399005|acylglycerol lipase [EC:3.1.1.23];K05941|4|2e-07|58.5|mdm:103435918|glutathione gamma-glutamylcysteinyltransferase [EC:2.3.2.15]	cDNA|No apical meristem protein, putative, expressed
LOC_Os04g44510	1.08	3.25	1.58941	0.998342	-	-	-	K04733|1|6e-23|109|ats:F775_18549|interleukin-1 receptor-associated kinase 4 [EC:2.7.11.1];K03868|2|6e-12|72.8|gmx:100792815|RING-box protein 1	cDNA|GEM, putative, expressed
LOC_Os01g67950	0.795	2.38	1.58193	0.995311	-	-	-	K09555|1|6e-26|119|gmx:100800041|BCL2-associated athanogene 1	cDNA|ubiquitin family protein, putative, expressed
LOC_Os03g15110	0.62	1.84	1.56937	0.927101	GO:0043231//intracellular membrane-bounded organelle	GO:0043169//cation binding;GO:0016791//phosphatase activity;GO:0016836//hydro-lyase activity	GO:0071265;GO:0043102	K16054|1|7e-09|62.4|sita:101776717|methylthioribulose 1-phosphate dehydratase / enolase-phosphatase E1 [EC:4.2.1.109 3.1.3.77]	cDNA|expressed protein
LOC_Os10g38489	1.97	5.81	1.56034	1	GO:0044424	GO:0016765//transferase activity, transferring alkyl or aryl (other than methyl) groups	-	K00799|1|0.0|889|osa:4349190|glutathione S-transferase [EC:2.5.1.18]	cDNA|glutathione S-transferase GSTU6, putative, expressed
LOC_Os10g40720	8.97	26.285	1.55106	1	GO:0031410//cytoplasmic vesicle	-	GO:0000003//reproduction	K20628|1|1e-62|241|pda:103717281|expansin	cDNA|expansin precursor, putative, expressed
LOC_Os02g53970	1.3	3.8	1.54749	0.997864	GO:0031410//cytoplasmic vesicle	-	-	K04733|1|4e-34|148|pop:POPTR_0004s14760g|interleukin-1 receptor-associated kinase 4 [EC:2.7.11.1];K13199|2|2e-21|105|mtr:MTR_7g081660|plasminogen activator inhibitor 1 RNA-binding protein;K01183|3|1e-11|73.2|aip:107646397|chitinase [EC:3.2.1.14]	cDNA|OsSub24 - Putative Subtilisin homologue, expressed
LOC_Os01g57004	1.93	5.565	1.52778	0.993838	-	-	-	-	cDNA|adhesive/proline-rich protein, putative, expressed
LOC_Os01g72460	0.705	2.03	1.52578	0.969487	-	-	-	K13436|1|2e-49|197|mtr:MTR_3g019120|pto-interacting protein 1 [EC:2.7.11.1]	cDNA|NADPH quinone oxidoreductase, putative, expressed
LOC_Os02g37200	6.15	17.705	1.5255	1	-	-	-	-	cDNA|hydrophobin, putative, expressed
LOC_Os06g01966	5.47	15.495	1.50219	1	GO:0031410//cytoplasmic vesicle	-	-	K00801|1|7e-63|229|ats:F775_23930|farnesyl-diphosphate farnesyltransferase [EC:2.5.1.21];K07874|3|3e-08|60.8|gmx:102668139|Ras-related protein Rab-1A	cDNA|auxin-induced protein 5NG4, putative, expressed
LOC_Os04g41620	6.015	16.9	1.49039	0.999936	GO:0031410//cytoplasmic vesicle	GO:0004553//hydrolase activity, hydrolyzing O-glycosyl compounds	GO:0009607//response to biotic stimulus;GO:0006026	K01183|1|3e-143|509|osa:4336263|chitinase [EC:3.2.1.14]	cDNA|CHIT2 - Chitinase family protein precursor, expressed
LOC_Os01g42110	1.965	5.465	1.47569	0.99441	GO:0031224//intrinsic component of membrane	-	GO:0071702//organic substance transport	K15382|1|2e-130|466|dosa:Os01t0606000-00|solute carrier family 50 (sugar transporter)	cDNA|nodulin MtN3 family protein, putative, expressed
LOC_Os07g40130	0.995	2.765	1.47451	0.998509	-	-	-	-	cDNA|retrotransposon protein, putative, Ty3-gypsy subclass, expressed
LOC_Os10g07340	0.85	2.35	1.46713	0.993434	-	-	-	-	cDNA|expressed protein
LOC_Os01g43740	0.42	1.16	1.46566	0.998204	-	GO:0016491//oxidoreductase activity;GO:0005506//iron ion binding	GO:0008152//metabolic process	K07426|1|7e-143|508|cam:101499206|cytochrome P450 family 4 subfamily B polypeptide 1 [EC:1.14.14.1];K07428|2|2e-138|494|sot:102584840|cytochrome P450 family 4 subfamily X [EC:1.14.14.1]	cDNA|cytochrome P450 72A1, putative, expressed
LOC_Os05g44300	1.975	5.415	1.45511	0.99801	-	-	-	-	cDNA|plant-specific domain TIGR01615 family protein, expressed
LOC_Os07g05700	1.225	3.335	1.44491	0.996037	GO:0043231//intracellular membrane-bounded organelle	-	-	-	cDNA|expressed protein
LOC_Os08g40060	0.445	1.205	1.43716	0.982246	-	-	-	-	cDNA|expressed protein
LOC_Os09g29690	2.35	6.345	1.43296	0.997293	GO:0031410//cytoplasmic vesicle	-	-	K20628|1|9e-30|130|fve:101293548|expansin;K14771|2|1e-09|63.9|egr:104415908|U3 small nucleolar RNA-associated protein 19	cDNA|beta-expansin precursor, putative, expressed
LOC_Os07g01904	16.205	43.66	1.42987	1	GO:0043231//intracellular membrane-bounded organelle	-	-	-	cDNA|expressed protein
LOC_Os01g73110	0.465	1.25	1.42663	0.985621	GO:0031410//cytoplasmic vesicle	-	-	-	cDNA|expressed protein
LOC_Os01g73000	18.7	50.055	1.42048	1	-	GO:0046914//transition metal ion binding;GO:0046914//transition metal ion binding;GO:0046914//transition metal ion binding	-	K16280|1|0.0|800|dosa:Os01t0960500-01|E3 ubiquitin-protein ligase RGLG [EC:2.3.2.27]	cDNA|copine, putative, expressed
LOC_Os10g05020	1.59	4.25	1.41844	0.997705	GO:0031410//cytoplasmic vesicle	GO:0016491//oxidoreductase activity;GO:0005506//iron ion binding	GO:0006091//generation of precursor metabolites and energy	K00512|1|0.0|724|sita:101754345|steroid 17alpha-monooxygenase / 17alpha-hydroxyprogesterone deacetylase [EC:1.14.14.19 1.14.14.32];K07408|2|4e-167|589|sita:101782889|cytochrome P450 family 1 subfamily A polypeptide 1 [EC:1.14.14.1]	cDNA|cytochrome P450, putative, expressed
LOC_Os05g18446	0.495	1.32	1.41504	0.991676	GO:0043231//intracellular membrane-bounded organelle	-	-	-	cDNA|retrotransposon protein, putative, Ty3-gypsy subclass, expressed
LOC_Os06g34020	0.525	1.4	1.41504	0.981919	GO:0031410//cytoplasmic vesicle	GO:0016798//hydrolase activity, acting on glycosyl bonds;GO:0043167//ion binding	GO:0044238//primary metabolic process	K19891|1|1e-65|252|eus:EUTSA_v10004013mg|glucan endo-1,3-beta-glucosidase 1/2/3 [EC:3.2.1.39]	cDNA|glycosyl hydrolases family 17, putative, expressed
LOC_Os03g16020	1.675	4.43	1.40315	0.998576	-	-	-	K13993|1|3e-56|219|dosa:Os03t0266900-02|HSP20 family protein	cDNA|hsp20/alpha crystallin family protein, putative, expressed
LOC_Os01g02690	0.525	1.385	1.3995	0.989879	GO:0031410//cytoplasmic vesicle;GO:0031410//cytoplasmic vesicle;GO:0031410//cytoplasmic vesicle	GO:0004672//protein kinase activity;GO:0032559//adenyl ribonucleotide binding;GO:0004672//protein kinase activity	GO:0006464//cellular protein modification process	K04733|1|4e-19|96.7|ats:F775_10295|interleukin-1 receptor-associated kinase 4 [EC:2.7.11.1]	cDNA|resistance-related receptor-like kinase, putative, expressed
LOC_Os04g55710	24.775	64.64	1.38354	1	-	GO:0003824//catalytic activity	-	K13051|1|0.0|664|osa:4337229|beta-aspartyl-peptidase (threonine type) [EC:3.4.19.5]	cDNA|transposon protein, putative, unclassified, expressed
LOC_Os04g34170	4.555	11.845	1.37876	0.99846	-	-	-	-	cDNA|retrotransposon protein, putative, unclassified, expressed
LOC_Os05g50500	1.295	3.36	1.37551	0.983687	GO:0043231//intracellular membrane-bounded organelle	-	-	-	cDNA|secretory protein, putative, expressed
LOC_Os11g04020	0.405	1.05	1.3744	0.989665	GO:0044464	-	-	K12818|1|3e-84|314|smo:SELMODRAFT_429199|ATP-dependent RNA helicase DHX8/PRP22 [EC:3.6.4.13];K14848|2|2e-46|175|sita:101766449|ribosome assembly protein RRB1;K17866|4|4e-32|141|ota:Ot07g02460|diphthamide biosynthesis protein 2;K06636|5|2e-07|59.7|mtr:MTR_1g058610|structural maintenance of chromosome 1	cDNA|major facilitator superfamily antiporter, putative, expressed
LOC_Os07g49200	0.45	1.165	1.37233	0.997165	GO:0044464	-	-	-	cDNA|membrane associated DUF588 domain containing protein, putative, expressed
LOC_Os01g28030	0.41	1.06	1.37037	0.944894	-	-	-	K00430|1|2e-154|546|obr:102711118|peroxidase [EC:1.11.1.7]	cDNA|peroxidase precursor, putative, expressed
LOC_Os08g30080	0.67	1.73	1.36854	0.984462	-	-	-	K13229|1|1e-78|295|zma:541977|2,4-dihydroxy-1,4-benzoxazin-3-one-glucoside dioxygenase [EC:1.14.20.2];K06892|2|6e-44|179|thj:104810262|feruloyl-CoA ortho-hydroxylase [EC:1.14.11.-]	cDNA|1-aminocyclopropane-1-carboxylate oxidase homolog 4, putative, expressed
LOC_Os06g40818	2.83	7.3	1.36709	0.998575	GO:0043231//intracellular membrane-bounded organelle;GO:0043231//intracellular membrane-bounded organelle	GO:0016787//hydrolase activity;GO:0016787//hydrolase activity	-	K02882|1|8e-38|159|aip:107606484|large subunit ribosomal protein L18Ae;K01381|3|1e-27|126|smo:SELMODRAFT_13348|saccharopepsin [EC:3.4.23.25];K00924|4|2e-24|115|tcc:TCM_041550|	cDNA|aspartic proteinase, putative, expressed
LOC_Os01g11810	1.425	3.635	1.35099	0.993484	GO:0043231//intracellular membrane-bounded organelle;GO:0031410//cytoplasmic vesicle;GO:0043231//intracellular membrane-bounded organelle;GO:0031410//cytoplasmic vesicle	-	-	K16573|1|4e-33|144|pda:103722329|gamma-tubulin complex component 6	cDNA|powdery mildew resistant protein 5, putative, expressed
LOC_Os03g64050	7.225	18.375	1.34667	1	GO:0031410//cytoplasmic vesicle	-	-	-	cDNA|receptor protein kinase, putative, expressed
LOC_Os02g26210	1.735	4.41	1.34584	0.989196	-	-	-	K14416|1|8e-16|85.9|aly:ARALYDRAFT_325603|elongation factor 1 alpha-like protein	cDNA|flowering promoting factor-like 1, putative, expressed
LOC_Os05g50700	0.445	1.125	1.33805	0.99755	-	-	-	K13425|1|3e-99|362|obr:102722775|WRKY transcription factor 22	cDNA|WRKY111, expressed
LOC_Os05g39990	6.68	16.795	1.33011	1	GO:0031410//cytoplasmic vesicle	-	-	K20628|1|1e-96|354|mus:103984183|expansin	cDNA|expansin precursor, putative, expressed
LOC_Os04g14680	0.48	1.205	1.32793	0.973214	-	GO:0005506//iron ion binding;GO:0016209//antioxidant activity	GO:0008152//metabolic process;GO:0006950//response to stress	K00434|1|3e-155|548|dosa:Os04t0223300-00|L-ascorbate peroxidase [EC:1.11.1.11]	cDNA|OsAPx3 - Peroxisomal Ascorbate Peroxidase encoding gene 5,8, expressed
LOC_Os04g37770	0.75	1.875	1.32193	0.974879	-	-	-	-	cDNA|transposon protein, putative, CACTA, En/Spm sub-class, expressed
LOC_Os01g16140	0.61	1.515	1.31244	0.98375	-	-	-	-	cDNA|expressed protein
LOC_Os05g11900	1.425	3.52	1.30461	0.988289	-	-	-	-	cDNA|expressed protein
LOC_Os03g11600	0.485	1.19	1.2949	0.983721	-	GO:0003676//nucleic acid binding;GO:0003676//nucleic acid binding	GO:0010073//meristem maintenance;GO:0048827//phyllome development;GO:0048437//floral organ development;GO:0048869//cellular developmental process;GO:0010073//meristem maintenance;GO:0048827//phyllome development;GO:0048437//floral organ development;GO:0048869//cellular developmental process	-	cDNA|YABBY domain containing protein, putative, expressed
LOC_Os03g06350	0.545	1.325	1.28166	0.96688	-	-	-	-	cDNA|DUF623 domain containing protein, expressed
LOC_Os01g04330	0.99	2.4	1.27753	0.983707	-	GO:0046872//metal ion binding	-	K13448|1|1e-91|337|dosa:Os01t0135700-01|calcium-binding protein CML	cDNA|OsCML16 - Calmodulin-related calcium sensor protein, expressed
LOC_Os03g01330	1.17	2.835	1.27684	0.997353	-	-	-	K01369|1|1e-18|95.9|osa:107275984|legumain [EC:3.4.22.34];K14494|2|1e-14|82.8|smo:SELMODRAFT_450795|DELLA protein	cDNA|sodium/potassium/calcium exchanger 1, putative, expressed
LOC_Os04g39814	6.27	15.19	1.27658	1	GO:0031410//cytoplasmic vesicle;GO:0031410//cytoplasmic vesicle;GO:0031410//cytoplasmic vesicle	GO:0016798//hydrolase activity, acting on glycosyl bonds;GO:0043167//ion binding;GO:0016798//hydrolase activity, acting on glycosyl bonds;GO:0043167//ion binding;GO:0016798//hydrolase activity, acting on glycosyl bonds;GO:0043167//ion binding	GO:0044238//primary metabolic process;GO:0044238//primary metabolic process;GO:0044238//primary metabolic process	K01188|1|0.0|983|osa:9269478|beta-glucosidase [EC:3.2.1.21]	cDNA|Os4bglu9 - beta-glucosidase homologue, similar to Os4Bglu12 exoglucanase/beta-glucosidase, expressed
LOC_Os06g06250	7.435	17.985	1.27439	1	GO:0031410//cytoplasmic vesicle;GO:0031410//cytoplasmic vesicle	GO:0016787//hydrolase activity;GO:0016787//hydrolase activity	GO:0044238//primary metabolic process;GO:0044238//primary metabolic process	K21026|1|0.0|706|dosa:Os06t0156600-01|acetylajmaline esterase [EC:3.1.1.80]	cDNA|GDSL-like lipase/acylhydrolase, putative, expressed
LOC_Os01g72490	0.48	1.155	1.26679	0.994775	-	-	-	-	cDNA|LRP1, putative, expressed
LOC_Os08g26880	2.04	4.895	1.26274	0.998683	-	GO:0005488//binding	-	-	cDNA|bZIP transcription factor domain containing protein, expressed
LOC_Os06g45140	3.26	7.81	1.26045	0.998483	GO:0043231//intracellular membrane-bounded organelle	GO:0003676//nucleic acid binding	GO:0006351//transcription, DNA-templated	-	cDNA|bZIP transcription factor domain containing protein, expressed
LOC_Os10g38540	0.525	1.25	1.25154	0.877041	GO:0044424	GO:0016765//transferase activity, transferring alkyl or aryl (other than methyl) groups	-	K00799|1|2e-118|426|dosa:Os10t0528900-01|glutathione S-transferase [EC:2.5.1.18]	cDNA|glutathione S-transferase, putative, expressed
LOC_Os08g34500	0.46	1.095	1.25123	0.975996	-	-	-	-	cDNA|expressed protein
LOC_Os03g32490	69.59	165.185	1.24713	1	GO:0043231//intracellular membrane-bounded organelle	-	-	-	cDNA|DUF1230 domain containing protein, expressed
LOC_Os09g25610	1.22	2.895	1.24668	0.994742	GO:0043231//intracellular membrane-bounded organelle	-	-	-	cDNA|class I glutamine amidotransferase, putative, expressed
LOC_Os06g13330	1.065	2.52	1.24257	0.989048	GO:0031410//cytoplasmic vesicle;GO:0031410//cytoplasmic vesicle;GO:0031410//cytoplasmic vesicle;GO:0031410//cytoplasmic vesicle	GO:0004672//protein kinase activity;GO:0000166//nucleotide binding;GO:0004672//protein kinase activity;GO:0032559//adenyl ribonucleotide binding;GO:0004672//protein kinase activity;GO:0000166//nucleotide binding	GO:0006464//cellular protein modification process	K20718|1|3e-25|93.2|obr:102705924|LRR receptor-like serine/threonine-protein kinase ERECTA [EC:2.7.11.1]	cDNA|expressed protein
LOC_Os03g64070	8.03	18.965	1.23987	1	GO:0043231//intracellular membrane-bounded organelle	-	-	K06966|1|3e-107|389|dosa:Os03t0857900-02|uncharacterized protein	cDNA|uncharacterized protein PA4923, putative, expressed
LOC_Os03g44380	0.5	1.18	1.23879	0.959887	GO:0009532//plastid stroma	GO:0043169//cation binding;GO:0010436//carotenoid dioxygenase activity	GO:0050896//response to stimulus;GO:0009687//abscisic acid metabolic process	K09840|1|0.0|1178|dosa:Os03t0645900-00|9-cis-epoxycarotenoid dioxygenase [EC:1.13.11.51]	cDNA|9-cis-epoxycarotenoid dioxygenase 1, chloroplast precursor, putative, expressed
LOC_Os04g59540	1.08	2.53	1.22811	0.998229	-	-	-	K00921|1|0.0|2454|dosa:Os04t0691900-01|1-phosphatidylinositol-3-phosphate 5-kinase [EC:2.7.1.150]	cDNA|phosphatidylinositol-4-phosphate 5-Kinase, putative, expressed
LOC_Os08g07380	0.615	1.44	1.22741	0.989341	-	-	-	K13457|1|2e-164|581|ats:F775_08345|disease resistance protein RPM1	cDNA|retrotransposon protein, putative, unclassified, expressed
LOC_Os03g45920	2.315	5.42	1.22728	0.993926	GO:0032991//macromolecular complex;GO:0015630//microtubule cytoskeleton	GO:0017111//nucleoside-triphosphatase activity;GO:0032561//guanyl ribonucleotide binding	GO:0043623//cellular protein complex assembly;GO:0009207;GO:0007017//microtubule-based process	K07375|1|0.0|832|dosa:Os03t0661300-01|tubulin beta	cDNA|tubulin/FtsZ domain containing protein, putative, expressed
LOC_Os05g43860	0.47	1.1	1.22677	0.98148	-	-	-	-	cDNA|expressed protein
LOC_Os02g43640	1.19	2.785	1.22672	0.987934	-	GO:0003676//nucleic acid binding;GO:0034061//DNA polymerase activity	GO:0006260//DNA replication	K18592|1|1e-08|62.0|ats:F775_08473|gamma-glutamyltranspeptidase / glutathione hydrolase / leukotriene-C4 hydrolase [EC:2.3.2.2 3.4.19.13 3.4.19.14];K13415|2|2e-08|61.6|obr:102715163|protein brassinosteroid insensitive 1 [EC:2.7.10.1 2.7.11.1];K12741|3|4e-06|53.9|ats:F775_18429|heterogeneous nuclear ribonucleoprotein A1/A3	cDNA|retrotransposon protein, putative, unclassified, expressed
LOC_Os01g57840	0.98	2.29	1.22449	0.983721	GO:0044464	-	GO:0051234//establishment of localization	K12669|1|2e-34|147|aly:ARALYDRAFT_334448|oligosaccharyltransferase complex subunit gamma;K17265|2|3e-08|60.5|nnu:104609434|Ras GTPase-activating protein-binding protein 1 [EC:3.6.4.12 3.6.4.13]	cDNA|expressed protein
LOC_Os01g49470	12.99	30.335	1.22358	1	-	-	-	K16276|1|0.0|2374|osa:4327944|zinc finger protein-like protein	cDNA|E3 ubiquitin ligase, putative, expressed
LOC_Os01g60770	2.51	5.86	1.22321	0.997286	GO:0031410//cytoplasmic vesicle	-	-	K20628|1|3e-96|353|mus:103984183|expansin	cDNA|expansin precursor, putative, expressed
LOC_Os02g51930	0.45	1.05	1.22239	0.971948	-	GO:0016757//transferase activity, transferring glycosyl groups	-	K13030|1|4e-123|442|sbi:SORBI_01g001220|cyanohydrin beta-glucosyltransferase [EC:2.4.1.85];K00699|4|1e-68|261|sly:101262190|glucuronosyltransferase [EC:2.4.1.17];K13692|5|2e-68|261|csv:101203684|UDP-glucose:(indol-3-yl)acetate beta-D-glucosyltransferase [EC:2.4.1.121]	cDNA|cytokinin-O-glucosyltransferase 2, putative, expressed
LOC_Os01g32670	1.02	2.37	1.21632	0.988849	-	-	-	-	cDNA|expressed protein
LOC_Os08g36630	0.49	1.135	1.21184	0.981009	GO:0031410//cytoplasmic vesicle	GO:0046914//transition metal ion binding;GO:0016836//hydro-lyase activity	GO:0044237//cellular metabolic process	K01674|1|1e-147|523|osa:9268297|carbonic anhydrase [EC:4.2.1.1]	cDNA|bifunctional monodehydroascorbate reductase and carbonic anhydrasenectarin-3 precursor, putative, expressed
LOC_Os02g26404	0.565	1.305	1.20773	0.884107	-	-	-	-	cDNA|expressed protein
LOC_Os11g37260	0.72	1.66	1.20511	0.981895	-	-	-	-	cDNA|SEY1, putative, expressed
LOC_Os07g08160	0.445	1.025	1.20375	0.915794	GO:0043231//intracellular membrane-bounded organelle	-	-	-	cDNA|early light-induced protein, chloroplast precursor, putative, expressed
LOC_Os11g30910	3.15	7.25	1.20263	0.993674	-	-	-	K01016|1|2e-82|307|pda:103697488|estrone sulfotransferase [EC:2.8.2.4];K01025|3|5e-66|253|tcc:TCM_011450|	cDNA|sulfotransferase domain containing protein, expressed
LOC_Os06g21230	0.465	1.07	1.20231	0.924472	-	-	-	-	cDNA|glycine rich protein family protein, putative, expressed
LOC_Os03g09170	1.45	3.33	1.19947	0.989325	-	-	-	K09286|1|2e-109|396|dosa:Os03t0191900-01|EREBP-like factor	cDNA|ethylene-responsive transcription factor, putative, expressed
LOC_Os06g04230	2.11	4.83	1.19478	0.989459	-	-	-	-	cDNA|expressed protein
LOC_Os09g31430	0.485	1.105	1.18799	0.955736	GO:0031410//cytoplasmic vesicle;GO:0043231//intracellular membrane-bounded organelle;GO:0031410//cytoplasmic vesicle;GO:0043231//intracellular membrane-bounded organelle	GO:0016798//hydrolase activity, acting on glycosyl bonds;GO:0043167//ion binding;GO:0016798//hydrolase activity, acting on glycosyl bonds;GO:0043167//ion binding	GO:0044238//primary metabolic process;GO:0044238//primary metabolic process	K01188|1|0.0|796|dosa:Os09t0491100-01|beta-glucosidase [EC:3.2.1.21]	cDNA|Os9bglu30 - beta-glucosidase, similar to Os4bglu12 exoglucanase, expressed
LOC_Os12g22489	4.71	10.73	1.18785	0.999029	GO:0043231//intracellular membrane-bounded organelle	-	-	-	cDNA|expressed protein
LOC_Os04g27670	2.63	5.965	1.18146	0.997705	GO:0043231//intracellular membrane-bounded organelle;GO:0043231//intracellular membrane-bounded organelle	-	-	K14184|1|4e-106|383|mus:103992270|alpha-humulene/beta-caryophyllene synthase [EC:4.2.3.104 4.2.3.57];K14181|3|9e-95|339|vvi:100232955|valencene/7-epi-alpha-selinene synthase [EC:4.2.3.73 4.2.3.86];K15803|5|1e-94|345|cit:102623643|(-)-germacrene D synthase [EC:4.2.3.22 4.2.3.75]	cDNA|terpene synthase family, metal binding domain containing protein, expressed
LOC_Os06g08090	19	43.05	1.18001	1	GO:0031410//cytoplasmic vesicle	GO:0016787//hydrolase activity;GO:0043167//ion binding	GO:0044238//primary metabolic process	K07964|1|0.0|966|dosa:Os06t0179000-01|heparanase [EC:3.2.1.166]	cDNA|heparanase-like protein precursor, putative, expressed
LOC_Os09g38110	0.65	1.47	1.1773	0.908834	-	GO:0046914//transition metal ion binding	GO:0009743//response to carbohydrate	K19040|1|2e-17|91.3|gmx:100527126|E3 ubiquitin-protein ligase ATL10/75/76/77/78 [EC:2.3.2.27]	cDNA|RING-H2 finger protein, putative, expressed
LOC_Os06g11660	8.83	19.965	1.17699	1	-	-	-	K14299|1|2e-10|68.2|mdm:103418195|nucleoporin SEH1	cDNA|phosphate-induced protein 1 conserved region domain containing protein, expressed
LOC_Os01g45110	0.83	1.875	1.17571	0.978321	-	GO:0016757//transferase activity, transferring glycosyl groups	-	K13496|1|3e-91|337|nnu:104599680|UDP-glucosyl transferase 73C [EC:2.4.1.-];K14595|3|2e-89|331|vvi:100248565|abscisate beta-glucosyltransferase [EC:2.4.1.263]	cDNA|anthocyanin 3-O-beta-glucosyltransferase, putative, expressed
LOC_Os12g13340	1.72	3.885	1.17551	0.993843	-	-	-	-	cDNA|expressed protein
LOC_Os10g17790	0.525	1.185	1.1745	0.961622	-	-	-	-	cDNA|remorin C-terminal domain containing protein, putative, expressed
LOC_Os03g39930	2.105	4.75	1.17411	0.994329	-	-	-	-	cDNA|retrotransposon protein, putative, unclassified, expressed
LOC_Os11g33270	0.785	1.76	1.16481	0.942288	GO:0005576//extracellular region;GO:0031410//cytoplasmic vesicle;GO:0030312//external encapsulating structure	GO:0016798//hydrolase activity, acting on glycosyl bonds;GO:0016758//transferase activity, transferring hexosyl groups	GO:0045229//external encapsulating structure organization;GO:0044042//glucan metabolic process	K08235|1|2e-167|589|dosa:Os11t0539200-01|xyloglucan:xyloglucosyl transferase [EC:2.4.1.207]	cDNA|glycosyl hydrolases family 16, putative, expressed
LOC_Os06g35520	2.305	5.165	1.164	0.995132	GO:0031410//cytoplasmic vesicle	GO:0016209//antioxidant activity;GO:0005506//iron ion binding;GO:0003824//catalytic activity	GO:0006950//response to stress;GO:0008152//metabolic process	K00430|1|0.0|641|osa:4341249|peroxidase [EC:1.11.1.7]	cDNA|peroxidase precursor, putative, expressed
LOC_Os01g52230	14.84	33.25	1.16386	1	-	-	GO:0008152//metabolic process	K06124|1|8e-149|527|dosa:Os01t0720400-01|phosphoethanolamine/phosphocholine phosphatase [EC:3.1.3.75]	cDNA|phosphoethanolamine/phosphocholine phosphatase, putative, expressed
LOC_Os03g59240	0.895	2.005	1.16364	0.990159	-	-	-	K05609|1|8e-41|169|thj:104813337|ubiquitin carboxyl-terminal hydrolase L3 [EC:3.4.19.12]	cDNA|carboxyl-terminal peptidase, putative, expressed
LOC_Os03g02780	2.395	5.365	1.16355	0.994059	-	-	-	K11254|1|1e-39|163|sot:102605056|histone H4	cDNA|Core histone H2A/H2B/H3/H4 domain containing protein, putative, expressed
LOC_Os10g39090	0.46	1.03	1.16294	0.989404	-	-	-	-	cDNA|hydrolase, alpha/beta fold family protein, putative, expressed
LOC_Os05g01630	0.655	1.465	1.16133	0.952298	-	-	-	-	cDNA|OsFBX156 - F-box domain containing protein, expressed
LOC_Os09g20880	0.515	1.15	1.15899	0.985571	-	GO:0004672//protein kinase activity;GO:0032559//adenyl ribonucleotide binding	GO:0006464//cellular protein modification process	K04733|1|4e-127|456|cit:102624330|interleukin-1 receptor-associated kinase 4 [EC:2.7.11.1]	cDNA|serine/threonine-protein kinase, putative, expressed
LOC_Os04g51150	2.17	4.82	1.15134	0.988886	GO:0031967;GO:0043231//intracellular membrane-bounded organelle;GO:0031224//intrinsic component of membrane	GO:0043169//cation binding;GO:0003824//catalytic activity	GO:0032501//multicellular organismal process;GO:0006091//generation of precursor metabolites and energy	K17893|1|3e-161|569|dosa:Os04t0600200-01|ubiquinol oxidase [EC:1.10.3.11]	cDNA|transposon protein, putative, unclassified, expressed
LOC_Os04g51820	1.915	4.25	1.15012	0.99393	GO:0044464;GO:0044464;GO:0044464;GO:0044464	-	-	-	cDNA|OsHKT1;1 - Na+ transporter, expressed
LOC_Os11g42500	3.685	8.165	1.14779	0.997185	GO:0031410//cytoplasmic vesicle	-	-	K01870|1|2e-14|81.6|eus:EUTSA_v10003524mg|isoleucyl-tRNA synthetase [EC:6.1.1.5];K14440|2|6e-08|59.7|ats:F775_09946|SWI/SNF-related matrix-associated actin-dependent regulator of chromatin subfamily A-like protein 1 [EC:3.6.4.12];K19027|3|1e-07|58.9|smo:SELMODRAFT_443317|zinc finger FYVE domain-containing protein 26	cDNA|dirigent, putative, expressed
LOC_Os07g42994	0.93	2.06	1.14734	0.987143	GO:0043231//intracellular membrane-bounded organelle	-	-	-	cDNA|hydrolase, putative, expressed
LOC_Os05g03920	0.495	1.095	1.14543	0.938736	-	GO:0004672//protein kinase activity;GO:0000166//nucleotide binding	-	K04733|1|1e-166|588|zma:100384005|interleukin-1 receptor-associated kinase 4 [EC:2.7.11.1]	cDNA|TKL_IRAK_DUF26-lf.3 - DUF26 kinases have homology to DUF26 containing loci, expressed
LOC_Os02g14680	1.21	2.65	1.13099	0.988858	-	GO:0016740//transferase activity;GO:0016740//transferase activity	-	K08237|1|0.0|668|obr:102718523|hydroquinone glucosyltransferase [EC:2.4.1.218]	cDNA|UDP-glucoronosyl and UDP-glucosyl transferase domain containing protein, expressed
LOC_Os01g50170	2.355	5.155	1.13025	0.997735	-	-	-	K02882|1|5e-23|110|adu:107496420|large subunit ribosomal protein L18Ae;K00924|3|2e-20|101|mdm:103448024|	cDNA|eukaryotic aspartyl protease domain containing protein, expressed
LOC_Os02g45820	1.23	2.685	1.12626	0.995746	GO:0019866//organelle inner membrane;GO:0005758//mitochondrial intermembrane space	GO:0043169//cation binding;GO:0008320//protein transmembrane transporter activity	GO:0006612//protein targeting to membrane	K17781|1|8e-33|141|dosa:Os04t0581300-01|mitochondrial import inner membrane translocase subunit TIM13	cDNA|mitochondrial import inner membrane translocase subunit Tim, putative, expressed
LOC_Os02g42430	1.055	2.3	1.12439	0.954285	-	-	-	K04733|1|3e-17|90.9|ats:F775_18549|interleukin-1 receptor-associated kinase 4 [EC:2.7.11.1];K03868|2|2e-10|68.2|gmx:100792815|RING-box protein 1	cDNA|GEM, putative, expressed
LOC_Os04g02920	1.85	4.03	1.12325	0.998256	-	-	-	K13420|1|8e-27|120|smo:SELMODRAFT_128564|LRR receptor-like serine/threonine-protein kinase FLS2 [EC:2.7.11.1]	cDNA|leucine-rich repeat family protein, putative, expressed
LOC_Os04g49230	1.15	2.5	1.12029	0.998014	GO:0043231//intracellular membrane-bounded organelle	-	-	K09287|1|2e-43|178|smo:SELMODRAFT_110104|RAV-like factor	cDNA|B3 DNA binding domain containing protein, expressed
LOC_Os01g10640	1.2	2.595	1.1127	0.997142	-	-	-	-	cDNA|expressed protein
LOC_Os10g07450	2.84	6.115	1.10646	0.989455	-	-	-	-	cDNA|expressed protein
LOC_Os04g27060	0.825	1.775	1.10535	0.924993	-	GO:0003824//catalytic activity	GO:0008152//metabolic process	K05275|1|4e-21|103|ppp:PHYPADRAFT_74042|pyridoxine 4-dehydrogenase [EC:1.1.1.65]	cDNA|oxidoreductase, aldo/keto reductase family protein, putative, expressed
LOC_Os02g09630	0.91	1.955	1.10323	0.943495	-	-	-	-	cDNA|GA20292-PA, putative, expressed
LOC_Os05g49240	4.165	8.935	1.10115	0.998179	-	GO:0003676//nucleic acid binding	-	-	cDNA|homeodomain-related, putative, expressed
LOC_Os06g30370	7.18	15.4	1.10087	0.997526	-	-	-	K16223|1|1e-37|157|ats:F775_05442|protein FLOWERING LOCUS T	cDNA|osMFT1 MFT-Like1 homologous to Mother of FT and TFL1 gene; contains Pfam profile PF01161: Phosphatidylethanolamine-binding protein, expressed
LOC_Os01g72520	3.2	6.86	1.10014	0.998682	-	GO:0016787//hydrolase activity	-	K01114|1|0.0|1012|dosa:Os01t0955000-02|phospholipase C [EC:3.1.4.3]	cDNA|phosphoesterase family protein, putative, expressed
LOC_Os05g51130	0.675	1.445	1.09811	0.98227	-	GO:0032559//adenyl ribonucleotide binding;GO:0016462//pyrophosphatase activity	-	K08900|1|0.0|911|osa:4339775|mitochondrial chaperone BCS1	cDNA|mitochondrial chaperone BCS1, putative, expressed
LOC_Os04g48390	4.105	8.78	1.09684	0.997266	GO:0044464;GO:0044464;GO:0044464	-	GO:0006810//transport;GO:0006810//transport;GO:0006810//transport	K12307|1|9e-07|57.4|gsl:Gasu_44180|MFS transporter, ceroid-lipofuscinosis neuronal protein 7	cDNA|uncharacterized membrane protein, putative, expressed
LOC_Os03g13050	1.83	3.88	1.08421	0.988854	GO:0043231//intracellular membrane-bounded organelle	-	-	K20858|1|2e-111|403|dosa:Os03t0233000-01|calcium uniporter protein, mitochondrial	cDNA|E2F-related protein, putative, expressed
LOC_Os01g46350	0.74	1.565	1.08057	0.979542	-	-	-	K16573|1|2e-47|191|pda:103722329|gamma-tubulin complex component 6	cDNA| proteins of unknown function domain containing protein, expressed
LOC_Os09g25330	0.585	1.235	1.078	0.978419	-	GO:0060089	GO:0009314//response to radiation;GO:0023052//signaling	K10523|1|7e-21|103|ats:F775_16894|speckle-type POZ protein	cDNA|BTBN19 - Bric-a-Brac, Tramtrack, Broad Complex BTB domain with non-phototropic hypocotyl 3 NPH3 domain, expressed
LOC_Os08g14000	1.365	2.88	1.07717	0.958415	GO:0031410//cytoplasmic vesicle	GO:0003824//catalytic activity	-	K01061|1|5e-80|298|sita:101781519|carboxymethylenebutenolidase [EC:3.1.1.45]	cDNA|retrotransposon protein, putative, Ty1-copia subclass, expressed
LOC_Os03g63760	2.63	5.54	1.07482	0.995158	GO:0031410//cytoplasmic vesicle	GO:0003824//catalytic activity	GO:0005975//carbohydrate metabolic process	K08235|1|1e-175|617|dosa:Os03t0854600-01|xyloglucan:xyloglucosyl transferase [EC:2.4.1.207]	cDNA|glycosyl hydrolases family 16, putative, expressed
LOC_Os03g08320	0.485	1.02	1.07251	0.923309	-	-	-	K13464|1|4e-83|309|dosa:Os03t0180900-01|jasmonate ZIM domain-containing protein	cDNA|ZIM domain containing protein, putative, expressed
LOC_Os03g54000	25.655	53.935	1.07198	1	GO:0044464	-	GO:0006810//transport	K04773|1|8e-17|90.9|mtr:MTR_5g082990|protease IV [EC:3.4.21.-]	cDNA|oligopeptide transporter, putative, expressed
LOC_Os06g38960	0.595	1.25	1.07097	0.978805	-	-	-	-	cDNA|expressed protein
LOC_Os08g36680	2.71	5.69	1.07014	0.995861	GO:0031410//cytoplasmic vesicle	GO:0046914//transition metal ion binding;GO:0016836//hydro-lyase activity	GO:0044237//cellular metabolic process	K01674|1|2e-145|516|osa:9270004|carbonic anhydrase [EC:4.2.1.1]	cDNA|bifunctional monodehydroascorbate reductase and carbonic anhydrasenectarin-3 precursor, putative, expressed
LOC_Os06g46920	0.485	1.015	1.06542	0.963797	-	GO:0005488//binding;GO:0005488//binding;GO:0005488//binding;GO:0048037//cofactor binding;GO:0005488//binding	GO:0008152//metabolic process;GO:0008152//metabolic process;GO:0008152//metabolic process;GO:0008152//metabolic process;GO:0008152//metabolic process	K13082|1|3e-54|213|gra:105769058|bifunctional dihydroflavonol 4-reductase/flavanone 4-reductase [EC:1.1.1.219 1.1.1.234]	cDNA|dihydroflavonol-4-reductase, putative, expressed
LOC_Os03g60580	6.415	13.4	1.06271	0.998509	GO:0044464	GO:0008092//cytoskeletal protein binding	-	K05765|1|2e-71|270|dosa:Os03t0820500-01|cofilin	cDNA|actin-depolymerizing factor, putative, expressed
LOC_Os02g16909	0.52	1.085	1.06111	0.871114	GO:0043231//intracellular membrane-bounded organelle;GO:0015630//microtubule cytoskeleton;GO:0042995//cell projection;GO:0043231//intracellular membrane-bounded organelle;GO:0015630//microtubule cytoskeleton;GO:0042995//cell projection	-	GO:0048468//cell development;GO:0048513//animal organ development;GO:0048468//cell development;GO:0048513//animal organ development	K10418|1|1e-36|154|dosa:Os02t0269200-01|dynein light chain LC8-type	cDNA|dynein light chain type 1 domain containing protein, expressed
LOC_Os04g52670	1.28	2.67	1.0607	0.987656	-	GO:0005515//protein binding	GO:0009755//hormone-mediated signaling pathway	K14488|1|3e-38|159|dosa:Os04t0617050-01|SAUR family protein	cDNA|OsSAUR21 - Auxin-responsive SAUR gene family member, expressed
LOC_Os04g02050	22.56	46.905	1.05597	1	GO:0043231//intracellular membrane-bounded organelle	GO:0004779//sulfate adenylyltransferase activity	GO:0006790//sulfur compound metabolic process	K13811|1|0.0|874|osa:4334932|3'-phosphoadenosine 5'-phosphosulfate synthase [EC:2.7.7.4 2.7.1.25]	cDNA|bifunctional 3-phosphoadenosine 5-phosphosulfate synthetase, putative, expressed
LOC_Os06g06790	0.49	1.015	1.05063	0.912892	GO:0031410//cytoplasmic vesicle	GO:0003824//catalytic activity	GO:0019725//cellular homeostasis	K09580|1|0.0|890|dosa:Os06t0163400-01|protein disulfide-isomerase A1 [EC:5.3.4.1]	cDNA|OsPDIL1-5 protein disulfide isomerase PDIL1-5, expressed
LOC_Os01g29804	0.58	1.2	1.04891	0.96316	GO:0043231//intracellular membrane-bounded organelle	-	-	-	cDNA|expressed protein
LOC_Os07g38590	3.355	6.94	1.04862	0.997196	GO:0031410//cytoplasmic vesicle	-	-	K05609|1|2e-39|165|thj:104813337|ubiquitin carboxyl-terminal hydrolase L3 [EC:3.4.19.12]	cDNA|carboxyl-terminal peptidase, putative, expressed
LOC_Os09g38300	0.88	1.805	1.03642	0.991081	-	-	-	-	cDNA|OsFBK20 - F-box domain and kelch repeat containing protein, expressed
LOC_Os03g55430	1.055	2.16	1.03379	0.93452	-	-	-	-	cDNA|expressed protein
LOC_Os03g08330	1	2.045	1.0321	0.970644	-	-	-	K13464|1|3e-58|226|dosa:Os03t0181100-01|jasmonate ZIM domain-containing protein	cDNA|ZIM domain containing protein, putative, expressed
LOC_Os12g25200	6.04	12.315	1.0278	0.997613	GO:0031224//intrinsic component of membrane	GO:0005254//chloride channel activity	GO:0015698//inorganic anion transport	K05016|1|0.0|1433|osa:4352132|chloride channel 7	cDNA|chloride transporter, chloride channel family, putative, expressed
LOC_Os01g42520	6.81	13.88	1.02728	1	GO:0043231//intracellular membrane-bounded organelle;GO:0031410//cytoplasmic vesicle	-	-	K03097|1|1e-08|62.4|aip:107623262|casein kinase II subunit alpha [EC:2.7.11.1]	cDNA|expressed protein
LOC_Os02g45310	0.685	1.395	1.02609	0.962369	-	GO:0016741	GO:0006730//one-carbon metabolic process	K16302|1|4e-83|310|atr:18445813|metal transporter CNNM;K15449|2|3e-82|307|vra:106763782|tRNA wybutosine-synthesizing protein 1 [EC:4.1.3.44]	cDNA|dehydration response related protein, putative, expressed
LOC_Os03g57880	0.885	1.8	1.02425	0.933337	GO:0031410//cytoplasmic vesicle;GO:0031410//cytoplasmic vesicle;GO:0031410//cytoplasmic vesicle	GO:0016798//hydrolase activity, acting on glycosyl bonds;GO:0043167//ion binding;GO:0016798//hydrolase activity, acting on glycosyl bonds;GO:0043167//ion binding;GO:0016798//hydrolase activity, acting on glycosyl bonds;GO:0043167//ion binding	GO:0044238//primary metabolic process;GO:0044238//primary metabolic process;GO:0044238//primary metabolic process	K15429|1|7e-147|522|cic:CICLE_v10007363mg|tRNA (guanine37-N1)-methyltransferase [EC:2.1.1.228];K19893|2|8e-145|515|spen:107020711|glucan endo-1,3-beta-glucosidase 5/6 [EC:3.2.1.39]	cDNA|glucan endo-1,3-beta-glucosidase precursor, putative, expressed
LOC_Os10g09240	2.68	5.445	1.0227	0.993912	-	-	-	-	cDNA|expressed protein
LOC_Os12g16350	35.425	71.89	1.02102	1	-	-	-	K05605|1|0.0|654|osa:4351929|3-hydroxyisobutyryl-CoA hydrolase [EC:3.1.2.4]	cDNA|enoyl-CoA hydratase/isomerase family protein, putative, expressed
LOC_Os05g31620	1.435	2.895	1.01251	0.963997	GO:0043231//intracellular membrane-bounded organelle	GO:0046872//metal ion binding	-	K13448|1|3e-80|299|dosa:Os05t0380900-01|calcium-binding protein CML	cDNA|OsCML15 - Calmodulin-related calcium sensor protein, expressed
LOC_Os02g10140	1.55	3.125	1.01159	0.990248	-	-	-	K14431|1|0.0|716|osa:4328605|transcription factor TGA	cDNA|bZIP transcription factor domain containing protein, expressed
LOC_Os07g44290	0.68	1.37	1.01057	0.955671	GO:0043231//intracellular membrane-bounded organelle	GO:0004672//protein kinase activity;GO:0032559//adenyl ribonucleotide binding	GO:0006464//cellular protein modification process;GO:0023052//signaling	K07198|1|0.0|752|bdi:100823960|5'-AMP-activated protein kinase, catalytic alpha subunit [EC:2.7.11.11]	cDNA|CAMK_KIN1/SNF1/Nim1_like.29 - CAMK includes calcium/calmodulin depedent protein kinases, expressed
LOC_Os05g18470	4.18	8.415	1.00946	0.995265	-	-	-	K14399|1|2e-32|141|csl:COCSUDRAFT_47181|polyribonucleotide 5'-hydroxyl-kinase [EC:2.7.1.78];K19996|2|3e-10|67.8|csv:101218102|phosphatidylinositol transfer protein SFH5;K02433|5|5e-06|53.9|apro:F751_6020|aspartyl-tRNA(Asn)/glutamyl-tRNA(Gln) amidotransferase subunit A [EC:6.3.5.6 6.3.5.7]	cDNA|CRAL/TRIO domain containing protein, expressed
LOC_Os02g28220	0.8	1.61	1.00899	0.986542	GO:0043231//intracellular membrane-bounded organelle	-	-	K14329|1|1e-30|97.8|ath:AT5G61160|agmatine coumaroyltransferase [EC:2.3.1.64 2.3.1.-];K19747|5|8e-24|73.9|jcu:105635561|BAHD acyltransferase [EC:2.3.1.-]	cDNA|transferase family protein, putative, expressed
LOC_Os01g47370	4.605	9.225	1.00235	0.993976	-	GO:0003676//nucleic acid binding	-	-	cDNA|MYB family transcription factor, putative, expressed
LOC_Os06g20040	1.805	3.615	1.002	0.997288	GO:0031410//cytoplasmic vesicle	GO:0008233//peptidase activity	-	K01381|1|1e-38|162|smo:SELMODRAFT_13348|saccharopepsin [EC:3.4.23.25];K02882|2|1e-37|159|adu:107496420|large subunit ribosomal protein L18Ae;K00924|5|6e-28|127|thj:104810886|	cDNA|aspartic proteinase nepenthesin-2 precursor, putative, expressed
LOC_Os04g37500	1.01	2.02	1	0.994573	-	GO:0016831//carboxy-lyase activity;GO:0048037//cofactor binding	GO:0009064//glutamine family amino acid metabolic process	K01580|1|0.0|966|dosa:Os04t0447800-01|glutamate decarboxylase [EC:4.1.1.15]	cDNA|glutamate decarboxylase, putative, expressed
LOC_Os04g40470	0.635	1.27	1	0.969368	-	-	-	K20617|1|0.0|822|dosa:Os04t0480700-01|cytochrome P450 family 71 subfamily A	cDNA|cytochrome P450, putative, expressed
LOC_Os04g01530	1.48	0.74	-1	0.985572	GO:0044424;GO:0044424;GO:0044424	GO:0019205//nucleobase-containing compound kinase activity;GO:0016776//phosphotransferase activity, phosphate group as acceptor;GO:0032559//adenyl ribonucleotide binding;GO:0019205//nucleobase-containing compound kinase activity;GO:0016776//phosphotransferase activity, phosphate group as acceptor;GO:0032559//adenyl ribonucleotide binding;GO:0019205//nucleobase-containing compound kinase activity;…	GO:0009117//nucleotide metabolic process;GO:0006796//phosphate-containing compound metabolic process;GO:0009117//nucleotide metabolic process;GO:0006796//phosphate-containing compound metabolic process;GO:0009117//nucleotide metabolic process;GO:0006796//phosphate-containing compound metabolic process	K13800|1|3e-135|483|dosa:Os04t0105500-01|UMP-CMP kinase [EC:2.7.4.- 2.7.4.14]	cDNA|adenylate kinase, putative, expressed
LOC_Os06g14450	1.87	0.935	-1	0.979971	GO:0044424	-	-	K07195|1|6e-54|211|obr:102711893|exocyst complex component 7	cDNA|exo70 exocyst complex subunit family protein, putative, expressed
LOC_Os10g37170	1.16	0.58	-1	0.93097	-	-	-	-	cDNA|retrotransposon protein, putative, unclassified, expressed
LOC_Os02g13900	10.545	5.265	-1.00205	1	GO:0031410//cytoplasmic vesicle	-	-	-	cDNA|BES1/BZR1 homolog protein, putative, expressed
LOC_Os04g09540	5.45	2.72	-1.00265	0.998523	-	-	-	K06130|1|5e-113|408|obr:102719490|lysophospholipase II [EC:3.1.1.5]	cDNA|acyl-protein thioesterase, putative, expressed
LOC_Os06g37300	4.4	2.195	-1.00328	0.99411	GO:0031410//cytoplasmic vesicle	-	-	K04122|1|0.0|920|dosa:Os06t0569500-01|ent-kaurene oxidase [EC:1.14.13.78]	cDNA|cytochrome P450, putative, expressed
LOC_Os05g35970	1.365	0.68	-1.00529	0.957708	-	-	-	-	cDNA|expressed protein
LOC_Os01g42690	1.185	0.59	-1.0061	0.977239	-	-	-	K06130|1|1e-117|424|obr:102708190|lysophospholipase II [EC:3.1.1.5]	cDNA|OsPOP2 - Putative Prolyl Oligopeptidase homologue, expressed
LOC_Os01g35980	4.41	2.195	-1.00656	0.996335	GO:0043231//intracellular membrane-bounded organelle;GO:0043231//intracellular membrane-bounded organelle;GO:0043231//intracellular membrane-bounded organelle;GO:0043231//intracellular membrane-bounded organelle;GO:0043231//intracellular membrane-bounded organelle;GO:0043231//intracellular membrane-bounded organelle	-	-	-	cDNA|expressed protein
LOC_Os07g09190	1.085	0.54	-1.00666	0.98574	GO:0043231//intracellular membrane-bounded organelle	GO:0016903//oxidoreductase activity, acting on the aldehyde or oxo group of donors;GO:0016744	GO:0006772//thiamine metabolic process;GO:0006721//terpenoid metabolic process	K01662|1|0.0|1375|dosa:Os07t0190000-01|1-deoxy-D-xylulose-5-phosphate synthase [EC:2.2.1.7]	cDNA|transketolase, putative, expressed
LOC_Os12g02440	1.065	0.53	-1.00679	0.985274	-	-	-	-	cDNA|WRKY95, expressed
LOC_Os07g46870	1.65	0.82	-1.00877	0.985803	GO:0043231//intracellular membrane-bounded organelle	-	-	K13070|1|2e-45|184|osa:4335093|momilactone-A synthase [EC:1.1.1.295];K09841|2|2e-43|177|atr:18433242|xanthoxin dehydrogenase [EC:1.1.1.288]	cDNA|sex determination protein tasselseed-2, putative, expressed
LOC_Os02g06890	4.78	2.375	-1.00908	0.995116	-	-	-	K13719|1|3e-119|429|osa:4328405|ubiquitin thioesterase OTU1 [EC:3.1.2.-]	cDNA|OTU-like cysteine protease family protein, putative, expressed
LOC_Os01g02360	1.58	0.785	-1.00916	0.991457	-	-	-	-	cDNA|resistance-related receptor-like kinase, putative, expressed
LOC_Os01g68390	1.49	0.74	-1.00972	0.991132	-	-	-	-	cDNA|Uncharacterized ACR, COG1565 containing protein, putative, expressed
LOC_Os02g58500	2.185	1.085	-1.00994	0.991035	-	GO:0046872//metal ion binding	GO:0019637//organophosphate metabolic process;GO:0006629//lipid metabolic process	K01047|1|5e-44|179|mus:103978222|secretory phospholipase A2 [EC:3.1.1.4]	cDNA|phospholipase A2, putative, expressed
LOC_Os01g39970	3.255	1.615	-1.01112	0.997298	-	GO:0004672//protein kinase activity	-	K04733|1|2e-139|498|mus:103981554|interleukin-1 receptor-associated kinase 4 [EC:2.7.11.1];K17609|2|4e-136|487|cic:CICLE_v10010213mg|nucleoredoxin [EC:1.8.1.8]	cDNA|protein kinase domain containing protein, putative, expressed
LOC_Os01g62920	3.51	1.74	-1.01238	0.996677	GO:0043231//intracellular membrane-bounded organelle	GO:0003676//nucleic acid binding;GO:0001071//nucleic acid binding transcription factor activity	GO:0006351//transcription, DNA-templated	K15613|1|4e-44|181|pmum:103332542|homeobox protein Meis1;K16670|3|3e-33|145|bdi:100844103|homeobox protein Meis2	cDNA|homeodomain protein, putative, expressed
LOC_Os10g37600	2.27	1.125	-1.01277	0.9954	-	-	-	-	cDNA|expressed protein
LOC_Os05g38140	7.515	3.72	-1.01447	0.999275	GO:0043231//intracellular membrane-bounded organelle	-	-	K13422|1|1e-06|55.5|atr:18429253|transcription factor MYC2	cDNA|basic helix-loop-helix DND-binding domain containing protein, expressed
LOC_Os10g30880	1.405	0.695	-1.01549	0.990856	GO:0043231//intracellular membrane-bounded organelle	-	-	-	cDNA|expressed protein
LOC_Os04g05430	3.885	1.92	-1.01681	0.994978	-	-	-	-	cDNA|retrotransposon protein, putative, Ty1-copia subclass, expressed
LOC_Os06g21830	1.275	0.63	-1.01707	0.974743	-	-	-	K18848|1|4e-101|367|dosa:Os06t0323100-01|indole-3-acetate O-methyltransferase [EC:2.1.1.278]	cDNA|methyltransferase, putative, expressed
LOC_Os04g45710	2.47	1.22	-1.01763	0.990451	-	-	-	-	cDNA|expressed protein
LOC_Os03g25920	1.095	0.54	-1.0199	0.982243	GO:0031224//intrinsic component of membrane	GO:0005275//amine transmembrane transporter activity	GO:0006865//amino acid transport	K11584|1|1e-95|351|cic:CICLE_v10029887mg|serine/threonine-protein phosphatase 2A regulatory subunit B';K13866|2|5e-11|70.9|sita:101775668|solute carrier family 7 (cationic amino acid transporter), member 4;K03294|3|5e-10|67.4|zma:103629848|basic amino acid/polyamine antiporter, APA family	cDNA|amino acid permease family protein, putative, expressed
LOC_Os01g02700	8.615	4.24	-1.02279	0.998604	GO:0031410//cytoplasmic vesicle;GO:0031410//cytoplasmic vesicle	GO:0004672//protein kinase activity;GO:0032559//adenyl ribonucleotide binding;GO:0004672//protein kinase activity;GO:0032559//adenyl ribonucleotide binding	GO:0006464//cellular protein modification process;GO:0006464//cellular protein modification process	K04733|1|1e-167|591|dosa:Os01t0116800-00|interleukin-1 receptor-associated kinase 4 [EC:2.7.11.1]	cDNA|protein kinase domain containing protein, expressed
LOC_Os01g68524	1.22	0.6	-1.02385	0.990891	GO:0043231//intracellular membrane-bounded organelle;GO:0043231//intracellular membrane-bounded organelle;GO:0043231//intracellular membrane-bounded organelle	GO:0005488//binding	-	K01176|1|2e-77|291|jcu:105633892|alpha-amylase [EC:3.2.1.1]	cDNA|pentatricopeptide, putative, expressed
LOC_Os03g55330	2.045	1.005	-1.02491	0.993098	-	GO:0016741	GO:0006730//one-carbon metabolic process	K18477|1|0.0|745|osa:4334192|type IV protein arginine methyltransferase [EC:2.1.1.322]	cDNA|ankyrin repeat domain containing protein, putative, expressed
LOC_Os02g54640	6.89	3.385	-1.02535	0.998032	GO:0031410//cytoplasmic vesicle;GO:0031410//cytoplasmic vesicle;GO:0031410//cytoplasmic vesicle;GO:0031410//cytoplasmic vesicle	-	-	K05387|1|0.0|1368|dosa:Os02t0787600-01|glutamate receptor, ionotropic, plant	cDNA|glutamate receptor, putative, expressed
LOC_Os10g30070	2.54	1.245	-1.02868	0.995336	GO:0031410//cytoplasmic vesicle	-	-	K13754|1|4e-137|489|bdi:104583652|solute carrier family 24 (sodium/potassium/calcium exchanger), member 6	cDNA|sodium/calcium exchanger protein, putative, expressed
LOC_Os05g38350	2.785	1.365	-1.02878	0.997736	-	-	-	K13508|1|0.0|733|dosa:Os05t0457800-01|glycerol-3-phosphate acyltransferase [EC:2.3.1.15]	cDNA|glycerol-3-phosphate acyltransferase 8, putative, expressed
LOC_Os02g45520	10.125	4.96	-1.02951	0.998623	GO:0044464;GO:0044464;GO:0044464;GO:0044464;GO:0044464	-	GO:0006810//transport;GO:0006810//transport;GO:0006810//transport;GO:0006810//transport;GO:0006810//transport	K12307|1|9e-06|53.9|gsl:Gasu_44180|MFS transporter, ceroid-lipofuscinosis neuronal protein 7	cDNA|uncharacterized membrane protein, putative, expressed
LOC_Os02g03570	12.65	6.195	-1.02996	0.997105	-	-	-	K13993|1|2e-60|233|dosa:Os02t0128000-00|HSP20 family protein	cDNA|hsp20/alpha crystallin family protein, putative, expressed
LOC_Os02g10000	2.175	1.065	-1.03016	0.985037	-	-	-	-	cDNA|zinc-binding protein, putative, expressed
LOC_Os01g31940	19.99	9.785	-1.03063	1	GO:0044464	-	-	-	cDNA|purine permease, putative, expressed
LOC_Os06g08154	1.38	0.675	-1.03171	0.985889	GO:0031410//cytoplasmic vesicle;GO:0031410//cytoplasmic vesicle;GO:0031410//cytoplasmic vesicle;GO:0031410//cytoplasmic vesicle;GO:0031410//cytoplasmic vesicle;GO:0031410//cytoplasmic vesicle;GO:0031410//cytoplasmic vesicle;GO:0031410//cytoplasmic vesicle;GO:0031410//cytoplasmic vesicle;GO:0031410//cytoplasmic vesicle	-	-	K04567|1|8e-07|57.0|ats:F775_18713|lysyl-tRNA synthetase, class II [EC:6.1.1.6];K04733|2|9e-06|53.5|ppp:PHYPADRAFT_155910|interleukin-1 receptor-associated kinase 4 [EC:2.7.11.1]	cDNA|receptor-like protein kinase 5 precursor, putative, expressed
LOC_Os04g49250	6.56	3.205	-1.03337	0.997107	GO:0043231//intracellular membrane-bounded organelle	-	-	K00012|1|3e-69|264|dosa:Os04t0581600-01|UDPglucose 6-dehydrogenase [EC:1.1.1.22]	cDNA|UDP-glucose/GDP-mannose dehydrogenase family, central domain containing protein, expressed
LOC_Os03g04130	6.98	3.41	-1.03346	0.995586	-	-	-	K00666|1|5e-171|602|sbi:SORBI_10g012080|fatty-acyl-CoA synthase [EC:6.2.1.-];K01904|5|2e-37|159|sita:101781746|4-coumarate--CoA ligase [EC:6.2.1.12]	cDNA|AMP-binding domain containing protein, expressed
LOC_Os01g31980	1.075	0.525	-1.03395	0.998661	GO:0044464;GO:0044464	GO:0015291//secondary active transmembrane transporter activity;GO:0015291//secondary active transmembrane transporter activity	GO:0015893//drug transport;GO:0015893//drug transport	K03327|1|0.0|755|bdi:100842847|multidrug resistance protein, MATE family	cDNA|MATE efflux family protein, putative, expressed
LOC_Os10g03320	1.075	0.525	-1.03395	0.985725	-	GO:0016757//transferase activity, transferring glycosyl groups	-	K18823|1|4e-60|233|aip:107622299|soyasaponin III rhamnosyltransferase [EC:2.4.1.273]	cDNA|UDP-glucoronosyl and UDP-glucosyl transferase domain containing protein, expressed
LOC_Os08g29660	6.215	3.035	-1.03406	0.995733	-	-	-	K16225|1|4e-14|80.5|crb:CARUB_v10025742mg|probable WRKY transcription factor 52;K13459|3|6e-14|80.1|adu:107468800|disease resistance protein RPS2;K13425|5|4e-11|70.5|mtr:MTR_8g028565|WRKY transcription factor 22	cDNA|WRKY69, expressed
LOC_Os01g04460	1.025	0.5	-1.03562	0.996867	GO:0031410//cytoplasmic vesicle	-	-	K04733|1|6e-144|512|obr:102708374|interleukin-1 receptor-associated kinase 4 [EC:2.7.11.1]	cDNA|Ser/Thr protein kinase, putative, expressed
LOC_Os04g22140	1.765	0.86	-1.03726	0.996305	-	-	-	-	cDNA|expressed protein
LOC_Os01g52790	2.155	1.05	-1.0373	0.998458	GO:0031410//cytoplasmic vesicle	GO:0016491//oxidoreductase activity;GO:0005506//iron ion binding	GO:0006091//generation of precursor metabolites and energy	K07426|1|7e-147|522|cam:101499206|cytochrome P450 family 4 subfamily B polypeptide 1 [EC:1.14.14.1];K07428|2|7e-144|512|sot:102582271|cytochrome P450 family 4 subfamily X [EC:1.14.14.1]	cDNA|cytochrome P450 72A1, putative, expressed
LOC_Os07g02330	4.24	2.065	-1.03792	0.996566	GO:0043231//intracellular membrane-bounded organelle	-	-	K01102|1|0.0|674|dosa:Os07t0114000-01|pyruvate dehydrogenase phosphatase [EC:3.1.3.43]	cDNA|protein phosphatase 2C, putative, expressed
LOC_Os06g13580	2.115	1.03	-1.03801	0.991245	-	-	-	-	cDNA|expressed protein
LOC_Os06g30250	1.705	0.83	-1.03859	0.983179	-	-	-	K18045|1|4e-13|77.8|osa:4330871|tyrosine-protein phosphatase SIW14 [EC:3.1.3.48]	cDNA|expressed protein
LOC_Os02g06380	1.12	0.545	-1.03917	0.989086	-	-	-	K18801|1|9e-44|179|smo:SELMODRAFT_47473|glucuronoxylan 4-O-methyltransferase [EC:2.1.1.112]	cDNA|plant-specific domain TIGR01627 family protein, expressed
LOC_Os08g08160	1.635	0.795	-1.04026	0.995707	-	-	-	K05765|1|7e-11|70.9|fve:101301142|cofilin	cDNA|expressed protein
LOC_Os03g42730	1.265	0.615	-1.04048	0.967933	GO:0043231//intracellular membrane-bounded organelle	-	-	K09487|1|9e-16|85.9|ats:F775_01522|heat shock protein 90kDa beta	cDNA|expressed protein
LOC_Os01g53560	3.045	1.48	-1.04085	0.99469	-	GO:0003676//nucleic acid binding;GO:0046914//transition metal ion binding	-	K08073|1|0.0|921|osa:4327876|bifunctional polynucleotide phosphatase/kinase [EC:3.1.3.32 2.7.1.78]	cDNA|phosphoesterase, putative, expressed
LOC_Os06g50060	1.41	0.685	-1.04152	0.972226	-	GO:0000166//nucleotide binding;GO:0000166//nucleotide binding;GO:0000166//nucleotide binding	-	K07904|1|3e-97|356|obr:102719684|Ras-related protein Rab-11A	cDNA|ras-related protein, putative, expressed
LOC_Os04g25800	1.04	0.505	-1.04223	0.99511	GO:0043231//intracellular membrane-bounded organelle	GO:0016757//transferase activity, transferring glycosyl groups	-	K13030|1|6e-99|362|sbi:SORBI_01g001220|cyanohydrin beta-glucosyltransferase [EC:2.4.1.85];K00699|4|4e-65|250|sly:101262190|glucuronosyltransferase [EC:2.4.1.17]	cDNA|cytokinin-O-glucosyltransferase 2, putative, expressed
LOC_Os01g17320	1.525	0.74	-1.04321	0.995145	GO:0043231//intracellular membrane-bounded organelle	-	-	K13096|1|3e-26|121|smo:SELMODRAFT_445231|splicing factor 4;K17964|2|4e-26|121|ats:F775_25862|leucine-rich PPR motif-containing protein, mitochondrial;K17710|4|4e-24|114|rcu:8268358|pentatricopeptide repeat domain-containing protein 1	cDNA|PPR repeat domain containing protein, putative, expressed
LOC_Os02g40840	2.59	1.255	-1.04526	0.995156	GO:0043231//intracellular membrane-bounded organelle	GO:0016614//oxidoreductase activity, acting on CH-OH group of donors	-	K17756|1|0.0|1314|dosa:Os02t0621800-01|long-chain-alcohol oxidase [EC:1.1.3.20]	cDNA|alcohol oxidase, putative, expressed
LOC_Os05g37950	5.925	2.87	-1.04576	0.998651	-	-	-	-	cDNA|guanylyl cyclase, putative, expressed
LOC_Os06g13870	2.18	1.055	-1.04709	0.997154	GO:0043231//intracellular membrane-bounded organelle	-	-	K10260|1|1e-15|85.9|csl:COCSUDRAFT_23114|F-box and WD-40 domain protein 7;K08332|2|1e-15|85.9|smo:SELMODRAFT_51240|;K04733|4|5e-15|84.0|egr:104442106|interleukin-1 receptor-associated kinase 4 [EC:2.7.11.1]	cDNA|U-box protein CMPG1, putative, expressed
LOC_Os04g22270	7.45	3.605	-1.04724	0.997241	-	-	-	-	cDNA|expressed protein
LOC_Os09g26960	16.825	8.14	-1.04751	1	-	GO:0016491//oxidoreductase activity;GO:0005506//iron ion binding	GO:0008152//metabolic process	K07410|1|0.0|785|ats:F775_17104|cytochrome P450 family 1 subfamily B polypeptide 1 [EC:1.14.14.1];K00512|2|3e-143|510|ats:F775_52187|steroid 17alpha-monooxygenase / 17alpha-hydroxyprogesterone deacetylase [EC:1.14.14.19 1.14.14.32];K05280|3|2e-123|444|nnu:104598992|flavonoid 3'-monooxygenase [EC:1.14.13.21]	cDNA|cytochrome P450, putative, expressed
LOC_Os12g35890	3.545	1.715	-1.04758	0.996919	-	GO:0003824//catalytic activity	-	K00306|1|0.0|744|dosa:Os12t0543600-00|sarcosine oxidase / L-pipecolate oxidase [EC:1.5.3.1 1.5.3.7]	cDNA|FAD dependent oxidoreductase domain containing protein, expressed
LOC_Os10g35950	1.985	0.96	-1.04803	0.996245	-	GO:0016740//transferase activity	-	K19861|1|0.0|766|osa:4349050|benzyl alcohol O-benzoyltransferase [EC:2.3.1.196 2.3.1.232]	cDNA|transferase family protein, putative, expressed
LOC_Os03g18550	43.825	21.175	-1.04939	1	GO:0019866//organelle inner membrane;GO:0031224//intrinsic component of membrane	-	GO:0006810//transport	K15113|1|4e-165|582|dosa:Os03t0296800-01|solute carrier family 25 (mitochondrial iron transporter), member 28/37	cDNA|mitochondrial carrier protein, putative, expressed
LOC_Os09g29200	37.735	18.23	-1.04959	1	-	GO:0016765//transferase activity, transferring alkyl or aryl (other than methyl) groups	-	K00799|1|1e-127|457|dosa:Os09t0467200-01|glutathione S-transferase [EC:2.5.1.18]	cDNA|glutathione S-transferase, putative, expressed
LOC_Os06g15730	11.055	5.34	-1.04979	0.999894	-	-	-	K15078|1|3e-93|345|pop:POPTR_0005s14930g|structure-specific endonuclease subunit SLX1 [EC:3.6.1.-];K19613|4|7e-85|317|sly:101251707|leucine-rich repeat protein SHOC2	cDNA|expressed protein
LOC_Os07g08180	1.92	0.925	-1.05358	0.983933	-	-	-	K17964|1|3e-44|181|pda:103707812|leucine-rich PPR motif-containing protein, mitochondrial	cDNA|PPR repeat containing protein, expressed
LOC_Os10g05010	1.05	0.505	-1.05603	0.990302	-	-	-	K04733|1|3e-25|117|ats:F775_20720|interleukin-1 receptor-associated kinase 4 [EC:2.7.11.1]	cDNA|expressed protein
LOC_Os03g13390	12.195	5.865	-1.05609	0.999668	-	GO:0003824//catalytic activity	GO:0008152//metabolic process	K00011|1|3e-92|340|sot:107058339|aldehyde reductase [EC:1.1.1.21];K19642|3|1e-91|337|tcc:TCM_011190|D-galacturonate reductase [EC:1.1.1.365]	cDNA|oxidoreductase, aldo/keto reductase family protein, putative, expressed
LOC_Os05g34170	153.7	73.865	-1.05715	1	GO:0032991//macromolecular complex;GO:0015630//microtubule cytoskeleton	GO:0017111//nucleoside-triphosphatase activity;GO:0032561//guanyl ribonucleotide binding	GO:0043623//cellular protein complex assembly;GO:0009207;GO:0007017//microtubule-based process	K07375|1|0.0|845|dosa:Os05t0413200-01|tubulin beta	cDNA|tubulin/FtsZ domain containing protein, putative, expressed
LOC_Os05g36150	4.6	2.21	-1.05759	0.996853	GO:0044464	-	-	K13832|1|1e-07|58.5|ota:Ot12g02660|3-dehydroquinate dehydratase / shikimate dehydrogenase [EC:4.2.1.10 1.1.1.25];K20363|2|1e-06|55.5|gsl:Gasu_30280|protein transport protein YIP1	cDNA|Yip1 domain containing protein, expressed
LOC_Os06g43510	8.3	3.985	-1.05853	0.999941	GO:0031410//cytoplasmic vesicle;GO:0043231//intracellular membrane-bounded organelle	GO:0046872//metal ion binding	-	K07418|1|2e-150|301|sbi:SORBI_10g009350|cytochrome P450 family 2 subfamily J [EC:1.14.14.1];K00512|5|3e-136|291|ats:F775_25325|steroid 17alpha-monooxygenase / 17alpha-hydroxyprogesterone deacetylase [EC:1.14.14.19 1.14.14.32]	cDNA|cytochrome P450 71D6, putative, expressed
LOC_Os04g54080	1.375	0.66	-1.05889	0.985214	GO:0044464	GO:0004871//signal transducer activity;GO:0030246//carbohydrate binding;GO:0004672//protein kinase activity;GO:0032559//adenyl ribonucleotide binding	GO:0006464//cellular protein modification process;GO:0008037//cell recognition	K04733|1|2e-46|132|ats:F775_11234|interleukin-1 receptor-associated kinase 4 [EC:2.7.11.1]	cDNA|serine/threonine-protein kinase receptor precursor, putative, expressed
LOC_Os03g39740	1.74	0.835	-1.05924	0.993436	-	-	-	-	cDNA|expressed protein
LOC_Os01g38100	1.24	0.595	-1.05938	0.817522	-	-	-	-	cDNA|expressed protein
LOC_Os11g45930	3.825	1.835	-1.05968	0.99867	-	-	-	K13457|1|7e-79|297|osa:4340191|disease resistance protein RPM1	cDNA|NBS-LRR type disease resistance protein, putative, expressed
LOC_Os07g02150	3.38	1.62	-1.06103	0.993813	GO:0043231//intracellular membrane-bounded organelle	-	-	K20777|1|4e-22|104|sita:101773693|exonuclease 3'-5' domain-containing protein 2 [EC:3.1.11.1]	cDNA|3-5 exonuclease domain-containing protein, putative, expressed
LOC_Os10g30640	2.34	1.12	-1.06301	0.995288	-	GO:0003677//DNA binding	-	-	cDNA|translin, putative, expressed
LOC_Os11g02550	2.675	1.28	-1.0634	0.995223	-	-	-	-	cDNA|expressed protein
LOC_Os09g15365	1.005	0.48	-1.06609	0.848381	GO:0031410//cytoplasmic vesicle	-	-	-	cDNA|hydrophobic protein, putative, expressed
LOC_Os08g38990	9.865	4.71	-1.06659	0.999438	-	-	-	K18835|1|0.0|1235|dosa:Os08t0499300-01|WRKY transcription factor 2	cDNA|WRKY30, expressed
LOC_Os08g43800	1.215	0.58	-1.06683	0.985434	-	-	-	-	cDNA|carrier, putative, expressed
LOC_Os03g55670	22.23	10.6	-1.06844	1	GO:0043231//intracellular membrane-bounded organelle	-	-	-	cDNA|expressed protein
LOC_Os04g33360	4.405	2.1	-1.06875	0.999281	-	-	-	K04125|1|5e-40|166|tcc:TCM_031081|gibberellin 2-oxidase [EC:1.14.11.13]	cDNA|gibberellin 2-beta-dioxygenase 7, putative, expressed
LOC_Os01g71599	30.585	14.57	-1.06982	0.991517	-	GO:0046914//transition metal ion binding	-	K11346|1|2e-12|74.7|dosa:Os03t0143600-01|inhibitor of growth protein 4	cDNA|expressed protein
LOC_Os05g05560	2.73	1.3	-1.07039	0.990428	-	-	-	K17411|1|4e-64|245|osa:4337808|small subunit ribosomal protein S33	cDNA|expressed protein
LOC_Os07g07300	4.62	2.2	-1.07039	0.999679	-	-	-	-	cDNA|expressed protein
LOC_Os10g33360	1.775	0.845	-1.0708	0.99165	-	-	-	-	cDNA|expressed protein
LOC_Os07g33480	7.205	3.42	-1.075	0.999486	GO:0031410//cytoplasmic vesicle	-	-	K07437|1|4e-121|436|cmo:103494945|cytochrome P450 family 26 subfamily A;K20667|2|2e-113|410|ats:F775_25340|beta-amyrin 28-monooxygenase [EC:1.14.13.201]	cDNA|cytochrome P450 domain containing protein, expressed
LOC_Os06g04200	3.34	1.585	-1.07537	0.995524	GO:0009536//plastid	GO:0046527//glucosyltransferase activity	GO:0006073//cellular glucan metabolic process	K13679|1|3e-52|106|mus:103978866|granule-bound starch synthase [EC:2.4.1.242]	cDNA|starch synthase, putative, expressed
LOC_Os01g54440	1.615	0.765	-1.078	0.991523	-	-	-	K14689|1|2e-59|231|crb:CARUB_v10019173mg|solute carrier family 30 (zinc transporter), member 2	cDNA|expressed protein
LOC_Os04g53860	3.895	1.845	-1.078	0.997133	-	-	-	K08695|1|1e-176|620|osa:4337101|anthocyanidin reductase [EC:1.3.1.77]	cDNA|reductase, putative, expressed
LOC_Os12g09680	11.615	5.49	-1.08111	0.999929	-	-	-	-	cDNA|retrotransposon protein, putative, Ty3-gypsy subclass, expressed
LOC_Os06g08720	39.825	18.805	-1.08256	1	GO:0031410//cytoplasmic vesicle;GO:0031410//cytoplasmic vesicle	GO:0004180//carboxypeptidase activity;GO:0004180//carboxypeptidase activity	GO:0019538//protein metabolic process;GO:0019538//protein metabolic process	K16297|1|0.0|936|dosa:Os06t0186400-01|serine carboxypeptidase-like clade II [EC:3.4.16.-]	cDNA|OsSCP32 - Putative Serine Carboxypeptidase homologue, expressed
LOC_Os10g40934	2.99	1.41	-1.08445	0.996621	-	GO:0003824//catalytic activity;GO:0003824//catalytic activity;GO:0003824//catalytic activity	GO:0008152//metabolic process;GO:0008152//metabolic process;GO:0008152//metabolic process	K05277|1|2e-49|199|bna:106375745|leucoanthocyanidin dioxygenase [EC:1.14.11.19];K05278|5|6e-49|197|egr:104428803|flavonol synthase [EC:1.14.11.23]	cDNA|flavonol synthase/flavanone 3-hydroxylase, putative, expressed
LOC_Os07g03170	1.05	0.495	-1.08489	0.977124	-	-	-	-	cDNA|expressed protein
LOC_Os08g38160	1.75	0.825	-1.08489	0.983268	-	-	-	K13496|1|1e-50|202|atr:18438282|UDP-glucosyl transferase 73C [EC:2.4.1.-]	cDNA|cytokinin-O-glucosyltransferase, putative, expressed
LOC_Os03g58750	3.84	1.81	-1.08512	0.997032	-	GO:0004672//protein kinase activity;GO:0032559//adenyl ribonucleotide binding	GO:0006464//cellular protein modification process	K04733|1|1e-161|570|sita:101754450|interleukin-1 receptor-associated kinase 4 [EC:2.7.11.1];K04730|5|9e-113|408|mus:103985090|interleukin-1 receptor-associated kinase 1 [EC:2.7.11.1]	cDNA|protein kinase domain containing protein, expressed
LOC_Os07g18240	1.22	0.575	-1.08525	0.980709	GO:0031410//cytoplasmic vesicle	GO:0004672//protein kinase activity;GO:0032559//adenyl ribonucleotide binding	GO:0006464//cellular protein modification process	K04733|1|0.0|848|sbi:SORBI_10g011150|interleukin-1 receptor-associated kinase 4 [EC:2.7.11.1];K04730|5|0.0|652|pda:103707661|interleukin-1 receptor-associated kinase 1 [EC:2.7.11.1]	cDNA|lectin-like receptor kinase, putative, expressed
LOC_Os01g12160	6.83	3.21	-1.08931	0.999746	-	-	GO:0009314//response to radiation;GO:0009725//response to hormone;GO:0009314//response to radiation;GO:0009725//response to hormone;GO:0009314//response to radiation;GO:0009725//response to hormone	K14506|1|0.0|935|obr:102719710|jasmonic acid-amino synthetase;K14487|4|0.0|816|sbi:SORBI_03g001490|auxin responsive GH3 gene family	cDNA|OsGH3.3 - Probable indole-3-acetic acid-amido synthetase, expressed
LOC_Os05g07880	1.415	0.665	-1.08938	0.99638	GO:0044464;GO:0044464	GO:0046872//metal ion binding;GO:0004620//phospholipase activity;GO:0046872//metal ion binding;GO:0004620//phospholipase activity	GO:0006650//glycerophospholipid metabolic process;GO:0006650//glycerophospholipid metabolic process	K01115|1|0.0|1660|dosa:Os05t0171000-01|phospholipase D1/2 [EC:3.1.4.4]	cDNA|phospholipase D, putative, expressed
LOC_Os05g50190	11.285	5.3	-1.09034	0.999897	-	GO:0004672//protein kinase activity;GO:0032559//adenyl ribonucleotide binding;GO:0004672//protein kinase activity;GO:0032559//adenyl ribonucleotide binding	GO:0006464//cellular protein modification process;GO:0006464//cellular protein modification process	K17535|1|2e-50|201|mdm:103444978|serine/threonine-protein kinase TNNI3K [EC:2.7.11.1];K14510|3|4e-46|187|rcu:8288382|serine/threonine-protein kinase CTR1 [EC:2.7.11.1]	cDNA|protein kinase domain containing protein, expressed
LOC_Os02g46460	7.05	3.31	-1.09079	0.999647	-	-	-	K14638|1|0.0|709|pda:103711806|solute carrier family 15 (peptide/histidine transporter), member 3/4	cDNA|peptide transporter PTR2, putative, expressed
LOC_Os06g11500	1.95	0.915	-1.09163	0.969189	-	-	-	-	cDNA|MCM9 - Putative minichromosome maintenance MCM family subunit 9, expressed
LOC_Os05g50850	1.77	0.83	-1.09257	0.993536	-	-	-	-	cDNA|expressed protein
LOC_Os10g11354	9.345	4.37	-1.09656	0.997773	GO:0044464	GO:0015291//secondary active transmembrane transporter activity	GO:0015893//drug transport	K03327|1|0.0|821|osa:9270974|multidrug resistance protein, MATE family	cDNA|MATE efflux family protein, putative, expressed
LOC_Os04g39910	3.52	1.645	-1.09749	0.997258	GO:0031410//cytoplasmic vesicle	-	-	K04733|1|0.0|659|vvi:100260297|interleukin-1 receptor-associated kinase 4 [EC:2.7.11.1]	cDNA|receptor-like protein kinase, putative, expressed
LOC_Os11g07460	1.145	0.535	-1.09774	0.995686	-	-	-	K16221|1|9e-26|119|brp:103855775|transcription factor TCP21 (protein CCA1 HIKING EXPEDITION)	cDNA|TCP family transcription factor, putative, expressed
LOC_Os05g25370	6.21	2.9	-1.09854	0.997966	GO:0031410//cytoplasmic vesicle	GO:0004672//protein kinase activity;GO:0000166//nucleotide binding	-	K04733|1|8e-166|585|cic:CICLE_v10013889mg|interleukin-1 receptor-associated kinase 4 [EC:2.7.11.1]	cDNA|TKL_IRAK_CrRLK1L-1.2 - The CrRLK1L-1 subfamily has homology to the CrRLK1L homolog, expressed
LOC_Os05g06660	3.72	1.735	-1.10037	0.996101	-	GO:0004180//carboxypeptidase activity;GO:0004180//carboxypeptidase activity	GO:0019538//protein metabolic process;GO:0019538//protein metabolic process	K16297|1|0.0|930|dosa:Os05t0158500-01|serine carboxypeptidase-like clade II [EC:3.4.16.-]	cDNA|OsSCP26 - Putative Serine Carboxypeptidase homologue, expressed
LOC_Os06g35060	2.285	1.065	-1.10134	0.995518	-	-	-	-	cDNA|heavy metal-associated domain containing protein, expressed
LOC_Os09g13470	3.92	1.825	-1.10296	0.997169	-	-	-	K06997|1|4e-33|144|ats:F775_00912|PLP dependent protein	cDNA|plant protein of unknown function domain containing protein, expressed
LOC_Os11g10180	1.01	0.47	-1.10362	0.947007	-	-	-	K10278|1|2e-08|62.0|lja:Lj0g3v0092599.1|F-box and leucine-rich repeat protein 12	cDNA|OsFBX412 - F-box domain containing protein, expressed
LOC_Os07g19030	5.55	2.58	-1.10512	0.996307	GO:0043231//intracellular membrane-bounded organelle;GO:0043231//intracellular membrane-bounded organelle	-	-	-	cDNA|tic22-like family domain containing protein, expressed
LOC_Os04g10460	3.52	1.635	-1.10628	0.999333	GO:0031410//cytoplasmic vesicle	-	-	K01426|1|0.0|860|osa:4335106|amidase [EC:3.5.1.4]	cDNA|amidase, putative, expressed
LOC_Os02g48150	5.49	2.55	-1.10631	0.996348	-	-	-	-	cDNA|expressed protein
LOC_Os01g20910	7.56	3.51	-1.10692	0.999539	GO:0043231//intracellular membrane-bounded organelle	-	-	K10664|1|5e-13|76.6|adu:107492102|E3 ubiquitin-protein ligase ATL6/9/15/31/42/55 [EC:2.3.2.27];K19041|2|2e-12|74.7|pvu:PHAVU_009G250400g|E3 ubiquitin-protein ligase RNF38/44 [EC:2.3.2.27];K19038|3|2e-12|74.3|zma:103649584|E3 ubiquitin-protein ligase ATL41 [EC:2.3.2.27];K16286|5|4e-12|73.6|osa:107280520|E3 ubiquitin-protein ligase EL5 [EC:2.3.2.27]	cDNA|zinc finger, C3HC4 type domain containing protein, expressed
LOC_Os02g39080	1.26	0.585	-1.10692	0.951954	-	-	-	-	cDNA|expressed protein
LOC_Os02g50740	28.68	13.31	-1.10753	1	-	-	-	K14963|1|4e-30|134|sind:105164749|COMPASS component SWD3;K03362|2|2e-25|119|rcu:8271178|F-box and WD-40 domain protein 1/11;K16794|4|2e-23|112|fve:101302907|platelet-activating factor acetylhydrolase IB subunit alpha;K10260|5|8e-17|90.5|cre:CHLREDRAFT_205525|F-box and WD-40 domain protein 7	cDNA|WD domain, G-beta repeat domain containing protein, expressed
LOC_Os03g07190	20.95	9.715	-1.10866	0.999896	GO:0043231//intracellular membrane-bounded organelle	-	-	-	cDNA|expressed protein
LOC_Os01g54810	1.295	0.6	-1.10992	0.983292	-	-	GO:0044238//primary metabolic process	-	cDNA|lipase, putative, expressed
LOC_Os07g41280	44.37	20.495	-1.11431	1	-	-	GO:0006007//glucose catabolic process;GO:0006007//glucose catabolic process	K01057|1|7e-160|565|dosa:Os07t0604000-01|6-phosphogluconolactonase [EC:3.1.1.31]	cDNA|6-phosphogluconolactonase, putative, expressed
LOC_Os03g56160	9.105	4.205	-1.11455	1	-	GO:0004871//signal transducer activity;GO:0004672//protein kinase activity;GO:0032559//adenyl ribonucleotide binding	GO:0006464//cellular protein modification process	K04733|1|0.0|812|sbi:SORBI_10g011150|interleukin-1 receptor-associated kinase 4 [EC:2.7.11.1];K04730|5|0.0|661|pda:103707661|interleukin-1 receptor-associated kinase 1 [EC:2.7.11.1]	cDNA|lectin-like receptor kinase 7, putative, expressed
LOC_Os02g51900	2.795	1.29	-1.11548	0.992589	-	GO:0016757//transferase activity, transferring glycosyl groups	-	K13030|1|4e-120|433|sbi:SORBI_01g001220|cyanohydrin beta-glucosyltransferase [EC:2.4.1.85];K13691|4|1e-72|275|pper:PRUPE_ppa005475mg|pathogen-inducible salicylic acid glucosyltransferase [EC:2.4.1.-]	cDNA|cytokinin-O-glucosyltransferase 2, putative, expressed
LOC_Os08g34560	1.575	0.725	-1.1193	0.988997	GO:0043231//intracellular membrane-bounded organelle;GO:0031410//cytoplasmic vesicle	-	-	K15919|1|1e-26|121|dosa:Os04t0107300-01|hydroxypyruvate reductase 2	cDNA|expressed protein
LOC_Os04g34220	3.51	1.61	-1.12441	0.99819	GO:0043231//intracellular membrane-bounded organelle	-	-	-	cDNA|expressed protein
LOC_Os01g38229	47.225	21.66	-1.12452	1	-	-	-	K09571|1|2e-91|307|pda:103709408|FK506-binding protein 4/5 [EC:5.2.1.8]	cDNA|peptidyl-prolyl isomerase, putative, expressed
LOC_Os02g11790	4.17	1.91	-1.12647	0.995465	-	-	-	-	cDNA|OsFBK4 - F-box domain and kelch repeat containing protein, expressed
LOC_Os03g08470	7.45	3.405	-1.12959	0.999535	GO:0043231//intracellular membrane-bounded organelle	GO:0001071//nucleic acid binding transcription factor activity	GO:0006351//transcription, DNA-templated	K09286|1|7e-117|422|dosa:Os03t0183000-01|EREBP-like factor	cDNA|AP2 domain containing protein, expressed
LOC_Os02g15100	1.545	0.705	-1.13191	0.997089	-	-	-	K19038|1|5e-20|99.8|mus:103997107|E3 ubiquitin-protein ligase ATL41 [EC:2.3.2.27]	cDNA|zinc finger, C3HC4 type domain containing protein, expressed
LOC_Os01g42990	2.655	1.21	-1.1337	0.993419	-	-	-	K17710|1|8e-16|86.3|ppp:PHYPADRAFT_2412|pentatricopeptide repeat domain-containing protein 1;K17964|2|8e-16|86.3|smo:SELMODRAFT_96794|leucine-rich PPR motif-containing protein, mitochondrial	cDNA|PPR repeat domain containing protein, putative, expressed
LOC_Os01g66820	1.12	0.51	-1.13493	0.988251	GO:0031410//cytoplasmic vesicle;GO:0031410//cytoplasmic vesicle;GO:0031410//cytoplasmic vesicle	-	-	K04733|1|1e-44|181|mtr:MTR_4g092530|interleukin-1 receptor-associated kinase 4 [EC:2.7.11.1]	cDNA|inactive receptor kinase At1g27190 precursor, putative, expressed
LOC_Os11g05810	1.835	0.835	-1.13593	0.995314	-	-	-	-	cDNA|expressed protein
LOC_Os08g41440	2.66	1.21	-1.13642	0.995508	-	GO:0048037//cofactor binding;GO:0016854//racemase and epimerase activity	GO:0044238//primary metabolic process	K08679|1|0.0|788|dosa:Os08t0526100-01|UDP-glucuronate 4-epimerase [EC:5.1.3.6]	cDNA|UDP-glucuronate 4-epimerase, putative, expressed
LOC_Os11g24510	18.175	8.25	-1.13949	0.999061	GO:0031410//cytoplasmic vesicle	-	-	K16296|1|0.0|922|dosa:Os11t0432900-01|serine carboxypeptidase-like clade I [EC:3.4.16.-]	cDNA|OsSCP56 - Putative Serine Carboxypeptidase homologue, expressed
LOC_Os07g13100	11.225	5.09	-1.14098	0.999999	-	-	-	-	cDNA|DNA binding protein, putative, expressed
LOC_Os02g21810	1.92	0.87	-1.14202	0.99365	GO:0031410//cytoplasmic vesicle	GO:0005506//iron ion binding	-	K05917|1|0.0|988|dosa:Os02t0323600-01|sterol 14-demethylase [EC:1.14.13.70]	cDNA|cytochrome P450 51, putative, expressed
LOC_Os05g34854	2.02	0.915	-1.14251	0.98313	-	-	-	K05282|1|7e-88|325|mus:103968827|gibberellin 20-oxidase [EC:1.14.11.12]	cDNA|gibberellin 20 oxidase 2, putative, expressed
LOC_Os01g21120	1.7	0.77	-1.1426	0.98695	-	-	-	K09286|1|9e-24|112|sind:105163098|EREBP-like factor	cDNA|AP2 domain containing protein, expressed
LOC_Os05g43040	13.36	6.05	-1.14291	0.999829	-	GO:0005515//protein binding	-	-	cDNA|tetratricopeptide repeat domain containing protein, expressed
LOC_Os06g36560	2.585	1.17	-1.14366	0.992108	GO:0044424	GO:0046914//transition metal ion binding;GO:0016701//oxidoreductase activity, acting on single donors with incorporation of molecular oxygen	GO:0006020//inositol metabolic process	K00469|1|0.0|652|dosa:Os06t0561000-01|inositol oxygenase [EC:1.13.99.1]	cDNA|inositol oxygenase, putative, expressed
LOC_Os09g34960	1.79	0.81	-1.14397	0.993688	-	GO:0046912//transferase activity, transferring acyl groups, acyl groups converted into alkyl on transfer	GO:0006720//isoprenoid metabolic process	K01641|1|0.0|909|dosa:Os09t0521400-01|hydroxymethylglutaryl-CoA synthase [EC:2.3.3.10]	cDNA|hydroxymethylglutaryl-CoA synthase, putative, expressed
LOC_Os06g06320	4.995	2.26	-1.14416	0.998452	-	GO:0005543//phospholipid binding;GO:0001071//nucleic acid binding transcription factor activity	GO:0009648//photoperiodism;GO:0009791//post-embryonic development;GO:0048506	K16223|1|1e-89|330|dosa:Os06t0157700-00|protein FLOWERING LOCUS T	cDNA|osFTL2 FT-Like2 homologous to Flowering Locus T gene; contains Pfam profile PF01161: Phosphatidylethanolamine-binding protein, expressed
LOC_Os08g37480	1.57	0.71	-1.14487	0.988964	-	-	-	-	cDNA|mediator of RNA polymerase II transcription subunit 22, putative, expressed
LOC_Os01g66830	3.55	1.605	-1.14525	0.998759	GO:0031410//cytoplasmic vesicle;GO:0031410//cytoplasmic vesicle	-	-	K19882|1|0.0|696|obr:102715818|O-palmitoleoyl-L-serine hydrolase [EC:3.1.1.98]	cDNA|pectinacetylesterase domain containing protein, expressed
LOC_Os07g36450	5.88	2.655	-1.1471	0.999726	GO:0043231//intracellular membrane-bounded organelle	-	-	K01166|1|2e-42|174|sbi:SORBI_03g042630|ribonuclease T2 [EC:3.1.27.1];K01183|2|4e-20|100|egr:104450059|chitinase [EC:3.2.1.14]	cDNA|PPR repeat domain containing protein, putative, expressed
LOC_Os02g09390	5.86	2.645	-1.14763	0.999469	-	GO:0046872//metal ion binding	-	K14985|1|5e-133|476|sita:101760082|26-hydroxylase [EC:1.14.-.-];K07418|2|6e-108|392|dosa:Os02t0185200-01|cytochrome P450 family 2 subfamily J [EC:1.14.14.1];K00512|3|1e-105|385|ats:F775_25325|steroid 17alpha-monooxygenase / 17alpha-hydroxyprogesterone deacetylase [EC:1.14.14.19 1.14.14.32];K07408|5|7e-103|375|bdi:104582990|cytochrome P450 family 1 subfamily A polypeptide 1 [EC:1.14.14.1]	cDNA|cytochrome P450, putative, expressed
LOC_Os08g26820	2.05	0.925	-1.1481	0.995674	-	-	-	K06997|1|1e-33|146|ats:F775_00912|PLP dependent protein	cDNA|plant protein of unknown function domain containing protein, expressed
LOC_Os07g48460	2.185	0.985	-1.14944	0.995268	-	-	-	-	cDNA|stress responsive protein, putative, expressed
LOC_Os06g34400	9.165	4.13	-1.14999	0.998691	GO:0031410//cytoplasmic vesicle	-	-	K19038|1|4e-16|86.7|mus:103997107|E3 ubiquitin-protein ligase ATL41 [EC:2.3.2.27];K19041|4|9e-16|85.5|lja:Lj6g3v1468220.1|E3 ubiquitin-protein ligase RNF38/44 [EC:2.3.2.27]	cDNA|zinc finger, C3HC4 type domain containing protein, expressed
LOC_Os01g62210	6.66	3	-1.15056	0.996753	GO:0043231//intracellular membrane-bounded organelle;GO:0030529//intracellular ribonucleoprotein complex	GO:0005198//structural molecule activity	GO:0010467//gene expression	K02879|1|6e-87|321|dosa:Os01t0839300-01|large subunit ribosomal protein L17	cDNA|50S ribosomal protein L17, putative, expressed
LOC_Os03g29864	6.23	2.805	-1.15123	0.999465	GO:0043231//intracellular membrane-bounded organelle	-	-	-	cDNA|retrotransposon protein, putative, unclassified, expressed
LOC_Os02g26390	1.335	0.6	-1.15381	0.995067	-	-	-	-	cDNA|expressed protein
LOC_Os11g02620	17.675	7.93	-1.15632	1	GO:0043231//intracellular membrane-bounded organelle	GO:0060089	GO:0023052//signaling;GO:0009314//response to radiation	K10523|1|9e-28|126|ats:F775_16894|speckle-type POZ protein	cDNA|BTBN21 - Bric-a-Brac, Tramtrack, Broad Complex BTB domain with non-phototropic hypocotyl 3 NPH3 and coiled-coil domains, expressed
LOC_Os09g28600	3.6	1.615	-1.15646	0.996754	-	-	-	K17867|1|1e-33|145|ats:F775_04085|diphthamide biosynthesis protein 4	cDNA|expressed protein
LOC_Os03g12260	4.515	2.025	-1.1568	0.999074	GO:0031410//cytoplasmic vesicle	GO:0016491//oxidoreductase activity;GO:0005506//iron ion binding	-	K00517|1|2e-129|464|mdm:103437977|	cDNA|cytochrome P450 protein, putative, expressed
LOC_Os06g48960	33.625	15.07	-1.15785	1	-	-	-	-	cDNA|AIG2-like family domain containing protein, expressed
LOC_Os10g41060	8.48	3.8	-1.15806	0.998605	-	-	-	-	cDNA|expressed protein
LOC_Os04g34610	285.42	127.73	-1.15999	1	-	-	-	K11426|1|4e-20|100|ats:F775_02917|SET and MYND domain-containing protein	cDNA|expressed protein
LOC_Os01g09930	1.475	0.66	-1.16018	0.992999	-	-	-	-	cDNA|helix-loop-helix DNA-binding domain containing protein, expressed
LOC_Os02g54760	2.045	0.915	-1.16026	0.99608	GO:0031224//intrinsic component of membrane	GO:0005267//potassium channel activity	GO:0030001//metal ion transport	K05391|1|0.0|1420|dosa:Os02t0789100-01|cyclic nucleotide gated channel, other eukaryote	cDNA|cyclic nucleotide-gated ion channel 14, putative, expressed
LOC_Os10g05240	1.745	0.78	-1.16168	0.989829	-	-	-	K04733|1|5e-24|114|ats:F775_20720|interleukin-1 receptor-associated kinase 4 [EC:2.7.11.1]	cDNA|OsFBX369 - F-box domain containing protein, expressed
LOC_Os04g30490	2.025	0.905	-1.16193	0.996713	GO:0044464;GO:0044464	GO:0015291//secondary active transmembrane transporter activity;GO:0015291//secondary active transmembrane transporter activity	GO:0015893//drug transport;GO:0015893//drug transport	K03327|1|0.0|782|dosa:Os04t0373400-01|multidrug resistance protein, MATE family	cDNA|MATE efflux family protein, putative, expressed
LOC_Os05g49430	1.435	0.64	-1.16491	0.995338	-	GO:0005488//binding;GO:0003824//catalytic activity	GO:0044238//primary metabolic process	K01792|1|0.0|655|osa:4339654|glucose-6-phosphate 1-epimerase [EC:5.1.3.15]	cDNA|aldose 1-epimerase, putative, expressed
LOC_Os03g03530	3.68	1.64	-1.16601	0.987231	GO:0044464;GO:0044464;GO:0044464;GO:0044464;GO:0044464;GO:0044464;GO:0044464;GO:0044464	-	-	-	cDNA|expressed protein
LOC_Os07g02060	1.315	0.585	-1.16855	0.987468	-	GO:0003676//nucleic acid binding	-	K13424|1|1e-24|115|mus:103994080|WRKY transcription factor 33;K18835|5|3e-24|114|pda:103710681|WRKY transcription factor 2	cDNA|WRKY29, expressed
LOC_Os05g42980	1.125	0.5	-1.16993	0.992008	-	-	-	-	cDNA|expressed protein
LOC_Os11g11970	5	2.215	-1.17462	0.99886	-	-	-	-	cDNA|expressed protein
LOC_Os01g25010	2.01	0.89	-1.17532	0.990935	-	-	-	K05278|1|2e-48|194|egr:104428803|flavonol synthase [EC:1.14.11.23]	cDNA|flavonol synthase/flavanone 3-hydroxylase, putative, expressed
LOC_Os08g26850	1.63	0.72	-1.1788	0.995673	-	-	-	K06997|1|5e-32|140|ats:F775_00912|PLP dependent protein	cDNA|plant protein of unknown function domain containing protein, expressed
LOC_Os01g65660	4.375	1.93	-1.18068	0.994823	GO:0031224//intrinsic component of membrane	-	-	K14209|1|4e-121|436|vvi:100265370|solute carrier family 36 (proton-coupled amino acid transporter)	cDNA|amino acid transporter, putative, expressed
LOC_Os06g13020	1.395	0.615	-1.18161	0.998681	-	-	-	K03512|1|0.0|1078|dosa:Os06t0237200-00|DNA polymerase lambda [EC:2.7.7.7 4.2.99.-]	cDNA|DNA polymerase lambda, putative, expressed
LOC_Os04g54210	4.88	2.15	-1.18254	0.996137	-	-	-	-	cDNA|expressed protein
LOC_Os04g15920	1.215	0.535	-1.18335	0.977758	-	GO:0003824//catalytic activity;GO:0046914//transition metal ion binding	GO:0008152//metabolic process	K00083|1|0.0|637|dosa:Os04t0229100-01|cinnamyl-alcohol dehydrogenase [EC:1.1.1.195]	cDNA|dehydrogenase, putative, expressed
LOC_Os02g50050	1.17	0.515	-1.18386	0.994835	-	-	-	-	cDNA|expressed protein
LOC_Os12g02980	19.4	8.53	-1.18544	1	GO:0031410//cytoplasmic vesicle	GO:0003824//catalytic activity	-	K14641|1|0.0|889|osa:4351367|apyrase [EC:3.6.1.5]	cDNA|nucleoside-triphosphatase, putative, expressed
LOC_Os04g02140	2.955	1.295	-1.19021	0.998646	GO:0043231//intracellular membrane-bounded organelle	-	-	K06620|1|0.0|684|osa:9266406|transcription factor E2F3	cDNA|transposon protein, putative, CACTA, En/Spm sub-class, expressed
LOC_Os01g05660	4.855	2.125	-1.19201	0.995746	-	-	-	K03979|1|3e-08|62.0|pper:PRUPE_ppa000648mg|GTPase [EC:3.6.5.-]	cDNA|expressed protein
LOC_Os12g18374	4.09	1.79	-1.19214	0.998635	-	-	-	K13457|1|8e-60|234|bdi:100824945|disease resistance protein RPM1	cDNA|NB-ARC domain containing protein, expressed
LOC_Os08g42390	1.395	0.61	-1.19338	0.996145	GO:0043231//intracellular membrane-bounded organelle;GO:0043231//intracellular membrane-bounded organelle	GO:0008081//phosphoric diester hydrolase activity;GO:0008081//phosphoric diester hydrolase activity	GO:0044238//primary metabolic process;GO:0019400	K18696|1|6e-96|352|pda:103708094|glycerophosphodiester phosphodiesterase [EC:3.1.4.46]	cDNA|glycerophosphoryl diester phosphodiesterase family protein, putative, expressed
LOC_Os09g39220	2.425	1.06	-1.19392	0.998285	GO:0031410//cytoplasmic vesicle	-	-	K00222|1|0.0|704|dosa:Os09t0565600-01|Delta14-sterol reductase [EC:1.3.1.70]	cDNA|delta14-sterol reductase, putative, expressed
LOC_Os07g44060	16.075	7.025	-1.19425	0.999416	-	GO:0003824//catalytic activity	-	K07025|1|2e-121|437|dosa:Os07t0634400-01|putative hydrolase of the HAD superfamily;K18551|5|9e-106|384|sbi:SORBI_02g040450|pyrimidine and pyridine-specific 5'-nucleotidase [EC:3.1.3.-]	cDNA|haloacid dehalogenase-like hydrolase family protein, putative, expressed
LOC_Os12g22620	1.11	0.485	-1.1945	0.990616	-	-	-	K19619|1|0.0|840|dosa:Os12t0414900-00|tyrosyl-DNA phosphodiesterase 2 [EC:3.1.4.-]	cDNA|endonuclease/Exonuclease/phosphatase family protein, expressed
LOC_Os04g38026	12.845	5.61	-1.19513	1	GO:0031224//intrinsic component of membrane	GO:0022857//transmembrane transporter activity	GO:0006810//transport	K16055|1|1e-134|481|ats:F775_15846|trehalose 6-phosphate synthase/phosphatase [EC:2.4.1.15 3.1.3.12];K08150|2|6e-31|137|vvi:100268023|MFS transporter, SP family, solute carrier family 2 (myo-inositol transporter), member 13	cDNA|transporter family protein, putative, expressed
LOC_Os04g54200	1.34	0.585	-1.19572	0.995121	-	GO:0016301//kinase activity;GO:0016301//kinase activity	GO:0007186//G-protein coupled receptor signaling pathway;GO:0006796//phosphate-containing compound metabolic process;GO:0007186//G-protein coupled receptor signaling pathway;GO:0006796//phosphate-containing compound metabolic process	K00901|1|0.0|1044|osa:4337126|diacylglycerol kinase (ATP) [EC:2.7.1.107]	cDNA|diacylglycerol kinase, putative, expressed
LOC_Os11g31190	2.245	0.98	-1.19586	0.997181	GO:0031224//intrinsic component of membrane;GO:0031410//cytoplasmic vesicle	-	GO:0071702//organic substance transport	K15382|1|3e-133|476|dosa:Os11t0508600-01|solute carrier family 50 (sugar transporter)	cDNA|nodulin MtN3 family protein, putative, expressed
LOC_Os07g46280	2.545	1.11	-1.19711	0.992767	GO:0031410//cytoplasmic vesicle;GO:0031410//cytoplasmic vesicle;GO:0031410//cytoplasmic vesicle	GO:0016798//hydrolase activity, acting on glycosyl bonds;GO:0043167//ion binding;GO:0016798//hydrolase activity, acting on glycosyl bonds;GO:0043167//ion binding;GO:0016798//hydrolase activity, acting on glycosyl bonds;GO:0043167//ion binding	GO:0044238//primary metabolic process;GO:0044238//primary metabolic process;GO:0044238//primary metabolic process	K05350|1|0.0|989|osa:4344146|beta-glucosidase [EC:3.2.1.21]	cDNA|Os7bglu26 - beta-mannosidase/glucosidase/exoglucanase, expressed
LOC_Os10g38470	3.395	1.48	-1.19781	0.996383	GO:0044424	GO:0016765//transferase activity, transferring alkyl or aryl (other than methyl) groups	-	K00799|1|0.0|832|osa:4349188|glutathione S-transferase [EC:2.5.1.18]	cDNA|glutathione S-transferase, putative, expressed
LOC_Os06g07190	3.59	1.565	-1.19782	0.998711	-	-	-	K03004|1|5e-35|149|pmum:103334679|DNA-directed RNA polymerase I subunit RPA43	cDNA|RNA polymerase Rpb7, N-terminal domain containing protein, expressed
LOC_Os06g51070	7.08	3.085	-1.19848	0.998253	-	-	-	K12581|1|2e-13|77.8|bna:106383523|CCR4-NOT transcription complex subunit 7/8;K01054|2|1e-11|72.4|bna:106399005|acylglycerol lipase [EC:3.1.1.23];K13126|3|7e-10|66.2|fve:101312606|polyadenylate-binding protein	cDNA|no apical meristem protein, putative, expressed
LOC_Os08g05830	2.435	1.06	-1.19986	0.994442	GO:0043231//intracellular membrane-bounded organelle	-	GO:0044238//primary metabolic process	K00616|1|0.0|692|dosa:Os08t0154300-01|transaldolase [EC:2.2.1.2]	cDNA|transaldolase, putative, expressed
LOC_Os02g06770	9.745	4.24	-1.2006	0.998251	-	-	-	-	cDNA|expressed protein
LOC_Os02g34990	3.545	1.54	-1.20286	0.99701	-	-	-	K00688|1|4e-06|55.1|mtr:MTR_2g014460|glycogen phosphorylase [EC:2.4.1.1]	cDNA|ACT domain containing protein, putative, expressed
LOC_Os01g53030	1.635	0.71	-1.2034	0.978645	-	-	-	-	cDNA|expressed protein
LOC_Os10g18510	1.785	0.775	-1.20366	0.995068	-	-	-	K04628|1|6e-81|303|vra:106769098|ceramide galactosyltransferase [EC:2.4.1.47];K13030|2|8e-54|213|sbi:SORBI_01g001220|cyanohydrin beta-glucosyltransferase [EC:2.4.1.85];K13496|3|7e-52|206|atr:18438282|UDP-glucosyl transferase 73C [EC:2.4.1.-];K13691|4|8e-51|202|pmum:103335041|pathogen-inducible salicylic acid glucosyltransferase [EC:2.4.1.-]	cDNA|UDP-glucoronosyl and UDP-glucosyl transferase domain containing protein, expressed
LOC_Os04g40440	1.005	0.435	-1.20811	0.992508	-	-	-	K10406|1|3e-144|514|tcc:TCM_032503|kinesin family member C2/C3;K13466|2|1e-77|293|sly:101263330|EIX receptor 1/2;K13420|4|7e-73|277|smo:SELMODRAFT_128564|LRR receptor-like serine/threonine-protein kinase FLS2 [EC:2.7.11.1]	cDNA|expressed protein
LOC_Os09g33640	4.025	1.74	-1.2099	0.99684	-	-	-	-	cDNA|expressed protein
LOC_Os07g03025	1.4	0.605	-1.21042	0.98965	-	-	-	-	cDNA|expressed protein
LOC_Os11g22449	6.84	2.95	-1.21328	0.998699	-	-	-	-	cDNA|expressed protein
LOC_Os07g15340	2.655	1.145	-1.21336	0.980958	GO:0031224//intrinsic component of membrane	GO:0005488//binding;GO:0005488//binding;GO:0005488//binding;GO:0005488//binding;GO:0005488//binding	-	K04733|1|5e-27|125|mtr:MTR_4g109010|interleukin-1 receptor-associated kinase 4 [EC:2.7.11.1];K12524|2|1e-26|124|mdm:103411884|bifunctional aspartokinase / homoserine dehydrogenase 1 [EC:2.7.2.4 1.1.1.3];K07748|3|9e-18|94.7|sita:101772970|sterol-4alpha-carboxylate 3-dehydrogenase (decarboxylating) [EC:1.1.1.170]	cDNA|hAT dimerisation domain-containing protein, putative, expressed
LOC_Os10g25150	3.49	1.505	-1.21346	0.98439	-	-	-	-	cDNA|expressed protein
LOC_Os03g05620	11.235	4.84	-1.21492	1	GO:0031224//intrinsic component of membrane	GO:0015291//secondary active transmembrane transporter activity	GO:0015698//inorganic anion transport	K08176|1|0.0|1018|dosa:Os03t0150600-01|MFS transporter, PHS family, inorganic phosphate transporter	cDNA|inorganic phosphate transporter, putative, expressed
LOC_Os09g35940	64.165	27.605	-1.21686	1	-	GO:0016491//oxidoreductase activity;GO:0005506//iron ion binding	-	K20619|1|0.0|657|obr:102699428|cytochrome P450 family 78 subfamily A;K00517|3|1e-145|518|brp:103843776|	cDNA|cytochrome P450, putative, expressed
LOC_Os11g01530	113.52	48.795	-1.21814	1	-	GO:0005506//iron ion binding;GO:0003824//catalytic activity	GO:0008152//metabolic process;GO:0000041//transition metal ion transport;GO:0006875//cellular metal ion homeostasis	K00522|1|1e-113|411|dosa:Os12t0106000-01|ferritin heavy chain [EC:1.16.3.2]	cDNA|ferritin-1, chloroplast precursor, putative, expressed
LOC_Os07g07420	3.525	1.515	-1.21831	0.996949	-	-	GO:0016101//diterpenoid metabolic process	K18054|1|0.0|1356|osa:4342505|2'-deoxymugineic-acid 2'-dioxygenase / mugineic-acid 3-dioxygenase [EC:1.14.11.24 1.14.11.25];K05282|2|0.0|687|dosa:Os07t0169700-00|gibberellin 20-oxidase [EC:1.14.11.12]	cDNA|gibberellin 20 oxidase 1-B, putative, expressed
LOC_Os05g44570	6.655	2.86	-1.21842	0.99954	-	GO:0060089;GO:0060089;GO:0060089;GO:0060089;GO:0060089;GO:0060089;GO:0060089	GO:0007165//signal transduction;GO:0007165//signal transduction;GO:0007165//signal transduction;GO:0007165//signal transduction;GO:0007165//signal transduction;GO:0007165//signal transduction;GO:0007165//signal transduction	K14490|1|2e-63|244|dosa:Os05t0521300-01|histidine-containing phosphotransfer peotein	cDNA|histidine-containing phosphotransfer protein, putative, expressed
LOC_Os02g35710	1.525	0.655	-1.21924	0.995123	-	-	-	-	cDNA|expressed protein
LOC_Os07g39790	1.06	0.455	-1.22013	0.992454	-	-	-	-	cDNA|expressed protein
LOC_Os05g40020	3.95	1.695	-1.22057	0.99838	-	GO:0046914//transition metal ion binding	-	K19040|1|1e-22|108|nnu:104593771|E3 ubiquitin-protein ligase ATL10/75/76/77/78 [EC:2.3.2.27]	cDNA|RING-H2 finger protein, putative, expressed
LOC_Os06g23670	2.065	0.885	-1.22239	0.996774	GO:0031410//cytoplasmic vesicle	-	-	-	cDNA|transposon protein, putative, Mariner sub-class, expressed
LOC_Os03g53390	4.135	1.765	-1.22822	0.998693	-	-	-	-	cDNA|expressed protein
LOC_Os03g61150	3.235	1.38	-1.2291	0.995689	-	-	-	-	cDNA|expressed protein
LOC_Os03g04070	3.665	1.56	-1.23227	0.999922	-	-	-	K12581|1|8e-18|92.8|bna:106383523|CCR4-NOT transcription complex subunit 7/8;K01054|2|2e-12|74.7|bna:106399005|acylglycerol lipase [EC:3.1.1.23];K13126|3|6e-10|66.6|fve:101312606|polyadenylate-binding protein;K03094|4|7e-06|53.1|lja:Lj2g3v3084320.1|S-phase kinase-associated protein 1	cDNA|no apical meristem protein, putative, expressed
LOC_Os01g32130	3.495	1.485	-1.23483	0.995295	-	-	-	-	cDNA|expressed protein
LOC_Os03g64340	1.095	0.465	-1.23563	0.99455	-	-	-	-	cDNA|heavy metal-associated domain containing protein, expressed
LOC_Os05g41490	1.88	0.795	-1.24171	0.995117	-	-	-	-	cDNA|circadian clock coupling factor ZGT, putative, expressed
LOC_Os08g42700	1.03	0.435	-1.24356	0.990499	-	GO:0032559//adenyl ribonucleotide binding	GO:0012501//programmed cell death;GO:0006950//response to stress	K13457|1|1e-109|399|sbi:SORBI_10g010670|disease resistance protein RPM1	cDNA|resistance protein, putative, expressed
LOC_Os06g38350	5.665	2.39	-1.24507	0.996609	GO:0031410//cytoplasmic vesicle	-	-	-	cDNA|expressed protein
LOC_Os04g56520	6.205	2.605	-1.25215	0.995229	GO:0044459;GO:0030312//external encapsulating structure	GO:0035251//UDP-glucosyltransferase activity	GO:0045229//external encapsulating structure organization;GO:0009250//glucan biosynthetic process	K13379|1|6e-85|315|dosa:Os04t0660400-01|reversibly glycosylated polypeptide / UDP-arabinopyranose mutase [EC:2.4.1.- 5.4.99.30]	cDNA|alpha-1,4-glucan-protein synthase, putative, expressed
LOC_Os02g48080	1.455	0.61	-1.25414	0.994246	-	GO:0004871//signal transducer activity;GO:0004672//protein kinase activity;GO:0032559//adenyl ribonucleotide binding	GO:0006464//cellular protein modification process	K04733|1|3e-170|599|ats:F775_24943|interleukin-1 receptor-associated kinase 4 [EC:2.7.11.1]	cDNA|cysteine-rich receptor-like protein kinase 7 precursor, putative, expressed
LOC_Os07g43450	2.595	1.085	-1.25804	0.995176	-	-	-	-	cDNA|expressed protein
LOC_Os01g09410	3.62	1.51	-1.26144	0.999999	-	-	-	K07151|1|2e-16|67.0|ats:F775_52478|dolichyl-diphosphooligosaccharide--protein glycosyltransferase [EC:2.4.99.18]	cDNA|expressed protein
LOC_Os03g61910	4.56	1.9	-1.26303	0.994726	GO:0043231//intracellular membrane-bounded organelle	-	-	K03517|1|1e-22|107|zma:100279087|quinolinate synthase [EC:2.5.1.72];K03834|2|1e-22|107|obr:102699852|tyrosine-specific transport protein;K03002|3|3e-20|99.8|ats:F775_25117|DNA-directed RNA polymerase I subunit RPA2 [EC:2.7.7.6];K04508|4|9e-16|84.7|gmx:100810406|transducin (beta)-like 1;K04733|5|4e-14|79.3|ats:F775_23151|interleukin-1 receptor-associated kinase 4 [EC:2.7.11.1]	cDNA|retrotransposon protein, putative, unclassified, expressed
LOC_Os03g19436	6.22	2.59	-1.26396	0.995228	GO:0043231//intracellular membrane-bounded organelle	-	-	-	cDNA|expressed protein
LOC_Os04g44930	1.25	0.52	-1.26534	0.996931	-	-	-	-	cDNA|expressed protein
LOC_Os09g03380	6.105	2.535	-1.26801	0.99892	GO:0043231//intracellular membrane-bounded organelle	-	-	-	cDNA|transposon protein, putative, Mutator sub-class, expressed
LOC_Os10g05460	1.23	0.51	-1.27009	0.985997	GO:0016020//membrane	-	GO:0006810//transport	-	cDNA|retrotransposon protein, putative, unclassified, expressed
LOC_Os06g41980	1.16	0.48	-1.27302	0.992497	GO:0031410//cytoplasmic vesicle	GO:0016301//kinase activity	GO:0043170	K04733|1|6e-83|310|ats:F775_20498|interleukin-1 receptor-associated kinase 4 [EC:2.7.11.1]	cDNA|LYK8, putative, expressed
LOC_Os06g44170	11.54	4.775	-1.27307	0.999207	-	GO:0048037//cofactor binding	GO:0008152//metabolic process	K13082|1|9e-46|185|pvu:PHAVU_001G012700g|bifunctional dihydroflavonol 4-reductase/flavanone 4-reductase [EC:1.1.1.219 1.1.1.234];K13265|3|2e-44|181|gmx:100794209|vestitone reductase [EC:1.1.1.348]	cDNA|NAD dependent epimerase/dehydratase family protein, putative, expressed
LOC_Os02g06754	4.1	1.695	-1.27434	0.998602	GO:0043231//intracellular membrane-bounded organelle	-	-	-	cDNA|expressed protein
LOC_Os02g06560	16.56	6.84	-1.27563	1	-	-	-	-	cDNA|wound induced protein, putative, expressed
LOC_Os02g18150	1.32	0.545	-1.27621	0.995623	-	-	-	-	cDNA|expressed protein
LOC_Os09g29820	5.995	2.475	-1.27633	0.999886	-	-	-	-	cDNA|bZIP transcription factor domain containing protein, expressed
LOC_Os02g05244	3.405	1.405	-1.27708	0.996319	-	-	-	-	cDNA|expressed protein
LOC_Os08g05320	1.81	0.745	-1.28068	0.994984	-	-	-	K11592|1|3e-43|165|dosa:Os01t0909200-01|endoribonuclease Dicer [EC:3.1.26.-]	cDNA|expressed protein
LOC_Os01g68840	3.51	1.44	-1.2854	0.998823	GO:0031410//cytoplasmic vesicle;GO:0031410//cytoplasmic vesicle;GO:0031410//cytoplasmic vesicle;GO:0031410//cytoplasmic vesicle	-	-	-	cDNA|CRP6 - Cysteine-rich family protein precursor, expressed
LOC_Os02g35970	1.855	0.76	-1.28735	0.994973	-	GO:0060089	GO:0009314//response to radiation;GO:0009606//tropism	K10523|1|3e-30|135|ats:F775_16894|speckle-type POZ protein	cDNA|BTBN2 - Bric-a-Brac, Tramtrack, Broad Complex BTB domain with non-phototropic hypocotyl 3 NPH3 and coiled-coil domains, expressed
LOC_Os07g02460	18.22	7.44	-1.29215	1	-	-	-	-	cDNA|expressed protein
LOC_Os03g11440	10.08	4.105	-1.29604	0.999991	GO:0044464	GO:0008320//protein transmembrane transporter activity	GO:0006810//transport	K10956|1|0.0|929|dosa:Os03t0213100-01|protein transport protein SEC61 subunit alpha	cDNA|protein transport protein Sec61 subunit alpha, putative, expressed
LOC_Os07g18990	12.605	5.13	-1.29697	0.999548	GO:0031410//cytoplasmic vesicle	-	-	-	cDNA|LTPL40 - Protease inhibitor/seed storage/LTP family protein precursor, expressed
LOC_Os03g05430	1.02	0.415	-1.29739	0.995304	-	GO:0008233//peptidase activity	-	K09648|1|2e-95|350|osa:9271486|mitochondrial inner membrane protease subunit 2 [EC:3.4.21.-]	cDNA|peptidase, putative, expressed
LOC_Os06g36220	1.28	0.52	-1.29956	0.995693	-	-	-	K10278|1|1e-07|59.3|lja:Lj0g3v0092599.1|F-box and leucine-rich repeat protein 12	cDNA|OsFBX198 - F-box domain containing protein, expressed
LOC_Os06g19260	1.49	0.605	-1.30031	0.993447	GO:0044464	-	-	K11267|1|2e-26|122|sbi:SORBI_10g010540|sister chromatid cohesion protein PDS5	cDNA|cadmium tolerance factor, putative, expressed
LOC_Os04g45860	4.84	1.965	-1.30048	0.99937	GO:0044464;GO:0044464;GO:0044464;GO:0044464;GO:0044464	-	GO:0006810//transport;GO:0006810//transport;GO:0006810//transport;GO:0006810//transport;GO:0006810//transport	K01807|1|2e-14|83.2|nnu:104595031|ribose 5-phosphate isomerase A [EC:5.3.1.6]	cDNA|transposon protein, putative, unclassified, expressed
LOC_Os11g19210	1.01	0.41	-1.30066	0.998571	GO:0031410//cytoplasmic vesicle	GO:0016798//hydrolase activity, acting on glycosyl bonds	GO:0044238//primary metabolic process	K15920|1|0.0|740|gra:105780678|beta-D-xylosidase 4 [EC:3.2.1.37]	cDNA|beta-D-xylosidase, putative, expressed
LOC_Os10g06720	6.675	2.705	-1.30314	0.998742	-	GO:0005488//binding;GO:0016857//racemase and epimerase activity, acting on carbohydrates and derivatives	GO:0005996//monosaccharide metabolic process	K01785|1|0.0|742|dosa:Os10t0155500-01|aldose 1-epimerase [EC:5.1.3.3]	cDNA|aldose 1-epimerase, putative, expressed
LOC_Os04g51920	2.03	0.82	-1.30778	0.99511	-	GO:0016668//oxidoreductase activity, acting on a sulfur group of donors, NAD(P) as acceptor	GO:0008152//metabolic process;GO:0019725//cellular homeostasis	K17609|1|0.0|840|osa:4336932|nucleoredoxin [EC:1.8.1.8]	cDNA|protein disulfide isomerase, putative, expressed
LOC_Os03g58790	2.31	0.93	-1.31259	0.994628	-	GO:0000166//nucleotide binding	-	K08900|1|9e-161|568|obr:102699770|mitochondrial chaperone BCS1	cDNA|ATPase, putative, expressed
LOC_Os08g40919	1.54	0.62	-1.31259	0.990654	-	GO:0016740//transferase activity	-	K01214|1|2e-62|240|ats:F775_21201|isoamylase [EC:3.2.1.68];K02370|2|1e-33|145|smo:SELMODRAFT_133161|alpha-1,4-N-acetylglucosaminyltransferase EXTL3 [EC:2.4.1.223 2.4.1.224]	cDNA|expressed protein
LOC_Os11g06990	1.095	0.44	-1.31536	0.996134	GO:0031410//cytoplasmic vesicle	-	-	-	cDNA|expressed protein
LOC_Os07g37010	2.665	1.07	-1.31652	0.993243	-	-	-	K18812|1|1e-138|494|dosa:Os07t0556000-01|cyclin D6, plant	cDNA|cyclin, putative, expressed
LOC_Os06g49680	1.77	0.71	-1.31786	0.995646	-	-	-	-	cDNA|expressed protein
LOC_Os12g31860	13.915	5.58	-1.3183	1	GO:0031410//cytoplasmic vesicle	-	-	-	cDNA|ureide permease, putative, expressed
LOC_Os08g26980	1.11	0.445	-1.31868	0.957087	GO:0043231//intracellular membrane-bounded organelle	-	-	-	cDNA|expressed protein
LOC_Os08g44310	1.5	0.6	-1.32193	0.994347	-	-	-	-	cDNA|expressed protein
LOC_Os07g24090	2.31	0.92	-1.32819	0.996773	-	-	-	K15032|1|0.0|767|dosa:Os07t0423000-01|mTERF domain-containing protein, mitochondrial	cDNA|mTERF domain containing protein, expressed
LOC_Os02g36840	1.105	0.44	-1.32847	0.994612	GO:0043231//intracellular membrane-bounded organelle;GO:0043231//intracellular membrane-bounded organelle	GO:0016757//transferase activity, transferring glycosyl groups;GO:0016757//transferase activity, transferring glycosyl groups	-	K13030|1|4e-95|350|sbi:SORBI_01g001220|cyanohydrin beta-glucosyltransferase [EC:2.4.1.85];K00699|4|7e-58|226|spen:107013955|glucuronosyltransferase [EC:2.4.1.17]	cDNA|cytokinin-O-glucosyltransferase 2, putative, expressed
LOC_Os03g11180	1.57	0.625	-1.32884	0.992339	GO:0031410//cytoplasmic vesicle	GO:0030414//peptidase inhibitor activity	-	K13899|1|4e-19|95.1|bdi:100823439|cystatin-C	cDNA|cysteine proteinase inhibitor 6 precursor, putative, expressed
LOC_Os06g10109	12.02	4.775	-1.33186	0.999534	GO:0031410//cytoplasmic vesicle;GO:0031410//cytoplasmic vesicle	-	-	-	cDNA|expressed protein
LOC_Os01g74490	1.8	0.715	-1.33198	0.998764	-	GO:0043169//cation binding	GO:0006812//cation transport	K14292|1|9e-19|95.1|spen:107013477|trimethylguanosine synthase [EC:2.1.1.-];K07213|2|3e-11|70.1|nnu:104601957|copper chaperone	cDNA|heavy metal-associated domain containing protein, expressed
LOC_Os03g24930	37.95	15.03	-1.33625	1	-	GO:0004672//protein kinase activity;GO:0032559//adenyl ribonucleotide binding	GO:0006464//cellular protein modification process	K04733|1|0.0|642|sita:101760000|interleukin-1 receptor-associated kinase 4 [EC:2.7.11.1]	cDNA|tyrosine protein kinase domain containing protein, putative, expressed
LOC_Os10g05900	1.175	0.465	-1.33736	0.994833	-	-	-	-	cDNA|expressed protein
LOC_Os03g55080	2.595	1.025	-1.34011	0.998302	-	GO:0003676//nucleic acid binding;GO:0003676//nucleic acid binding	-	K18835|1|7e-24|113|cmo:103490997|WRKY transcription factor 2;K08819|5|1e-22|109|thj:104822348|cyclin-dependent kinase 12/13 [EC:2.7.11.22 2.7.11.23]	cDNA|WRKY3, expressed
LOC_Os01g04920	4.78	1.885	-1.34245	0.998118	-	-	GO:0008152//metabolic process	K06119|1|1e-80|300|dosa:Os01t0142300-01|sulfoquinovosyltransferase [EC:2.4.1.-]	cDNA|glycosyl transferase, group 1 domain containing protein, expressed
LOC_Os02g20360	9.965	3.92	-1.34602	0.999636	GO:0043231//intracellular membrane-bounded organelle	GO:0008483//transaminase activity;GO:0048037//cofactor binding;GO:0016846//carbon-sulfur lyase activity	GO:0008652//cellular amino acid biosynthetic process;GO:0000041//transition metal ion transport	K14271|1|0.0|889|dosa:Os02t0306401-00|nicotianamine aminotransferase [EC:2.6.1.80]	cDNA|tyrosine aminotransferase, putative, expressed
LOC_Os02g41800	5.46	2.145	-1.34792	0.999527	-	GO:0005488//binding	GO:0009725//response to hormone;GO:0050794//regulation of cellular process	K14486|1|3e-69|264|gra:105769009|auxin response factor	cDNA|auxin response factor, putative, expressed
LOC_Os02g13510	53.855	21.13	-1.34979	1	GO:0031410//cytoplasmic vesicle	GO:0004672//protein kinase activity;GO:0000166//nucleotide binding	-	K00924|1|0.0|1046|osa:4341290|	cDNA|receptor-like protein kinase 5 precursor, putative, expressed
LOC_Os01g38359	3.675	1.44	-1.35168	0.999064	-	-	-	K09571|1|1e-36|155|obr:102703639|FK506-binding protein 4/5 [EC:5.2.1.8]	cDNA|peptidyl-prolyl cis-trans isomerase, FKBP-type, putative, expressed
LOC_Os10g05088	4.89	1.91	-1.35626	0.997213	GO:0031410//cytoplasmic vesicle	-	-	K00679|1|3e-41|170|cic:CICLE_v10027727mg|phospholipid:diacylglycerol acyltransferase [EC:2.3.1.158];K01188|2|7e-32|139|aly:ARALYDRAFT_316517|beta-glucosidase [EC:3.2.1.21];K10960|3|3e-24|114|atr:18422248|geranylgeranyl diphosphate/geranylgeranyl-bacteriochlorophyllide a reductase [EC:1.3.1.83 1.3.1.111];K21026|4|5e-17|90.1|mtr:MTR_2g015630|acetylajmaline esterase [EC:3.1.1.80]	cDNA|GDSL-like lipase/acylhydrolase, putative, expressed
LOC_Os07g40000	44.26	17.235	-1.36066	1	-	-	-	-	cDNA|DUF260 domain containing protein, putative, expressed
LOC_Os08g13440	130.97	50.89	-1.36378	1	GO:0005576//extracellular region;GO:0031410//cytoplasmic vesicle	GO:0046914//transition metal ion binding	-	K11426|1|2e-46|187|sly:101250545|SET and MYND domain-containing protein	cDNA|cupin domain containing protein, expressed
LOC_Os06g37010	1.395	0.54	-1.36923	0.999207	GO:0016020//membrane;GO:0016020//membrane	GO:0046873//metal ion transmembrane transporter activity;GO:0046873//metal ion transmembrane transporter activity	GO:0006829//zinc II ion transport;GO:0006829//zinc II ion transport	K14709|1|2e-114|412|osa:9271816|solute carrier family 39 (zinc transporter), member 1/2/3	cDNA|metal cation transporter, putative, expressed
LOC_Os11g39370	29.265	11.325	-1.36967	1	-	GO:0004672//protein kinase activity;GO:0000166//nucleotide binding	-	K04733|1|8e-131|469|cam:101499501|interleukin-1 receptor-associated kinase 4 [EC:2.7.11.1];K13418|5|2e-123|444|smo:SELMODRAFT_443356|somatic embryogenesis receptor kinase 1 [EC:2.7.10.1 2.7.11.1]	cDNA|BRASSINOSTEROID INSENSITIVE 1-associated receptor kinase 1 precursor, putative, expressed
LOC_Os06g45620	5.535	2.135	-1.37435	0.999981	-	-	-	-	cDNA|expressed protein
LOC_Os11g03780	1.115	0.43	-1.37464	0.999658	GO:0031410//cytoplasmic vesicle	GO:0004553//hydrolase activity, hydrolyzing O-glycosyl compounds;GO:0043167//ion binding	GO:0019566//arabinose metabolic process	K01209|1|0.0|1324|dosa:Os11t0132600-01|alpha-N-arabinofuranosidase [EC:3.2.1.55]	cDNA|alpha-N-arabinofuranosidase, putative, expressed
LOC_Os09g29210	1.22	0.47	-1.37615	0.996348	-	-	-	-	cDNA|purine permease, putative, expressed
LOC_Os11g33394	91.315	35.11	-1.37897	1	-	-	-	K06997|1|5e-19|97.4|ats:F775_00912|PLP dependent protein	cDNA|plant protein of unknown function domain containing protein, expressed
LOC_Os02g10580	1.015	0.39	-1.37993	0.951263	-	-	-	K15078|1|2e-12|74.7|rcu:8276537|structure-specific endonuclease subunit SLX1 [EC:3.6.1.-]	cDNA|NB-ARC domain containing disease resistance protein, putative, expressed
LOC_Os05g12460	2.045	0.785	-1.38134	0.92944	-	-	-	-	cDNA|expressed protein
LOC_Os06g08460	1.29	0.495	-1.38187	0.990481	GO:0031410//cytoplasmic vesicle;GO:0043231//intracellular membrane-bounded organelle	-	-	K07195|1|5e-18|94.4|egu:105049683|exocyst complex component 7	cDNA|exo70 exocyst complex subunit, putative, expressed
LOC_Os12g01530	91.97	35.145	-1.38784	1	-	GO:0005506//iron ion binding;GO:0003824//catalytic activity	GO:0008152//metabolic process;GO:0000041//transition metal ion transport;GO:0006875//cellular metal ion homeostasis	K00522|1|4e-103|376|dosa:Os12t0106000-01|ferritin heavy chain [EC:1.16.3.2]	cDNA|ferritin-1, chloroplast precursor, putative, expressed
LOC_Os11g37960	3.365	1.285	-1.38884	0.997947	GO:0031410//cytoplasmic vesicle	-	GO:0006952//defense response;GO:0033554//cellular response to stress;GO:0001906//cell killing	-	cDNA|WIP4 - Wound-induced protein precursor, expressed
LOC_Os12g34900	1.3	0.495	-1.39301	0.998254	-	-	-	-	cDNA|expressed protein
LOC_Os01g43844	18.32	6.965	-1.39522	1	-	GO:0016491//oxidoreductase activity;GO:0005506//iron ion binding	GO:0008152//metabolic process	K07426|1|4e-140|499|cam:101499206|cytochrome P450 family 4 subfamily B polypeptide 1 [EC:1.14.14.1];K07428|2|8e-132|472|sot:102584840|cytochrome P450 family 4 subfamily X [EC:1.14.14.1]	cDNA|cytochrome P450 72A1, putative, expressed
LOC_Os03g29930	2.435	0.925	-1.3964	0.999533	-	-	-	-	cDNA|expressed protein
LOC_Os12g02960	5.195	1.97	-1.39893	0.991065	-	-	-	K00799|1|2e-64|244|dosa:Os12t0123200-01|glutathione S-transferase [EC:2.5.1.18]	cDNA|glutathione S-transferase, putative, expressed
LOC_Os06g45990	1.24	0.47	-1.39961	0.996731	GO:0031224//intrinsic component of membrane	-	GO:0051234//establishment of localization	K19996|1|4e-120|433|fve:101291501|phosphatidylinositol transfer protein SFH5	cDNA|patellin-5, putative, expressed
LOC_Os06g03580	18.505	6.985	-1.40558	1	GO:0005887//integral component of plasma membrane	-	GO:0031589//cell-substrate adhesion	K19045|1|4e-153|542|dosa:Os06t0125800-01|E3 ubiquitin-protein ligase BIG BROTHER and related proteins [EC:2.3.2.27]	cDNA|zinc RING finger protein, putative, expressed
LOC_Os05g02200	10.815	4.075	-1.40816	0.999946	GO:0031410//cytoplasmic vesicle	-	-	K04733|1|3e-20|100|atr:18446781|interleukin-1 receptor-associated kinase 4 [EC:2.7.11.1]	cDNA|cysteine-rich repeat secretory protein 55 precursor, putative, expressed
LOC_Os02g09810	4.025	1.51	-1.41444	0.99697	GO:0031224//intrinsic component of membrane;GO:0031224//intrinsic component of membrane	-	-	K14207|1|0.0|795|dosa:Os02t0191300-01|solute carrier family 38 (sodium-coupled neutral amino acid transporter), member 2	cDNA|amino acid transporter, putative, expressed
LOC_Os04g40630	20.835	7.815	-1.41469	1	-	-	-	K00517|1|1e-45|181|eus:EUTSA_v10010463mg|	cDNA|BTBZ4 - Bric-a-Brac, Tramtrack, Broad Complex BTB domain with TAZ zinc finger and Calmodulin-binding domains, expressed
LOC_Os06g11420	1.52	0.57	-1.41504	0.992994	-	-	-	K06063|1|0.0|804|dosa:Os06t0218000-00|SNW domain-containing protein 1	cDNA|SKIP/SNW domain containing protein, expressed
LOC_Os10g41480	1.405	0.525	-1.42018	0.986359	GO:0043231//intracellular membrane-bounded organelle	GO:0016765//transferase activity, transferring alkyl or aryl (other than methyl) groups	GO:0008652//cellular amino acid biosynthetic process	K01626|1|0.0|987|dosa:Os10t0564400-01|3-deoxy-7-phosphoheptulonate synthase [EC:2.5.1.54]	cDNA|phospho-2-dehydro-3-deoxyheptonate aldolase, chloroplast precursor, putative, expressed
LOC_Os12g12934	63.915	23.88	-1.42035	1	GO:0043231//intracellular membrane-bounded organelle	-	-	K14638|1|9e-130|465|bdi:100840688|solute carrier family 15 (peptide/histidine transporter), member 3/4	cDNA|peptide transporter PTR3-A, putative, expressed
LOC_Os01g62430	2.855	1.065	-1.42264	0.99451	-	-	-	K01803|1|2e-58|226|sita:101760718|triosephosphate isomerase (TIM) [EC:5.3.1.1];K12486|2|8e-09|62.0|bvg:104901231|stromal membrane-associated protein	cDNA|C2 domain containing protein, putative, expressed
LOC_Os11g12050	2.255	0.84	-1.42467	0.997149	-	-	-	K13457|1|0.0|1084|osa:9267892|disease resistance protein RPM1	cDNA|NBS-LRR type disease resistance protein, putative, expressed
LOC_Os03g11900	14.78	5.5	-1.42614	0.99894	GO:0031224//intrinsic component of membrane	GO:0022857//transmembrane transporter activity	GO:0006810//transport	K16055|1|5e-107|389|ats:F775_15846|trehalose 6-phosphate synthase/phosphatase [EC:2.4.1.15 3.1.3.12];K08150|2|2e-47|192|atr:18433512|MFS transporter, SP family, solute carrier family 2 (myo-inositol transporter), member 13	cDNA|transporter family protein, putative, expressed
LOC_Os01g70730	7.625	2.835	-1.42739	0.997317	-	-	-	K14416|1|3e-26|120|aly:ARALYDRAFT_325603|elongation factor 1 alpha-like protein	cDNA|flowering promoting factor-like 1, putative, expressed
LOC_Os04g23580	3.455	1.275	-1.43819	0.998743	-	-	-	K20891|1|3e-87|323|tcc:TCM_027853|beta-glucuronosyltransferase [EC:2.4.1.-]	cDNA|xylosyltransferase, putative, expressed
LOC_Os02g17760	6.26	2.31	-1.43827	0.999507	GO:0031410//cytoplasmic vesicle	-	-	K00512|1|6e-130|465|ats:F775_17267|steroid 17alpha-monooxygenase / 17alpha-hydroxyprogesterone deacetylase [EC:1.14.14.19 1.14.14.32];K07418|3|1e-122|441|ats:F775_26289|cytochrome P450 family 2 subfamily J [EC:1.14.14.1]	cDNA|cytochrome P450, putative, expressed
LOC_Os11g08940	8.975	3.305	-1.44126	0.999555	-	GO:0046914//transition metal ion binding;GO:0003676//nucleic acid binding;GO:0034062//RNA polymerase activity	GO:0010467//gene expression	K03007|1|2e-35|149|dosa:Os11t0194800-01|DNA-directed RNA polymerases I, II, and III subunit RPABC5	cDNA|RNA polymerases N 8 kDa subunit, putative, expressed
LOC_Os04g57850	1.305	0.48	-1.44294	0.99551	-	-	-	K00666|1|1e-151|538|sbi:SORBI_10g012080|fatty-acyl-CoA synthase [EC:6.2.1.-];K10526|5|3e-44|181|egu:105055657|OPC-8:0 CoA ligase 1 [EC:6.2.1.-]	cDNA|AMP-binding enzyme, putative, expressed
LOC_Os06g46140	3.62	1.33	-1.44456	0.999523	-	-	-	-	cDNA|expressed protein
LOC_Os07g10170	1.035	0.38	-1.44556	0.986087	-	-	-	-	cDNA|expressed protein
LOC_Os09g11460	49.29	18.05	-1.4493	1	-	-	-	K09286|1|3e-20|100|thj:104822620|EREBP-like factor	cDNA|AP2 domain containing protein, expressed
LOC_Os08g37930	1.325	0.485	-1.44994	0.996939	GO:0031410//cytoplasmic vesicle	-	-	K20628|1|2e-28|127|fve:101293548|expansin	cDNA|beta-expansin precursor, putative, expressed
LOC_Os07g27880	1.81	0.66	-1.45545	0.998478	-	-	-	K13262|1|4e-52|185|vvi:100243529|isoflavone-7-O-methyltransferase [EC:2.1.1.150];K13230|3|3e-49|181|zma:100147731|2,4,7-trihydroxy-1,4-benzoxazin-3-one-glucoside 7-O-methyltransferase [EC:2.1.1.241];K16040|5|9e-48|166|vvi:100233030|trans-resveratrol di-O-methyltransferase [EC:2.1.1.240]	cDNA|O-methyltransferase, putative, expressed
LOC_Os02g01700	1.61	0.585	-1.46055	0.996907	-	GO:0046872//metal ion binding	-	K19041|1|4e-13|76.6|pda:103712211|E3 ubiquitin-protein ligase RNF38/44 [EC:2.3.2.27];K19040|2|2e-12|74.3|zma:100281214|E3 ubiquitin-protein ligase ATL10/75/76/77/78 [EC:2.3.2.27]	cDNA|RNA recognition motif containing protein, putative, expressed
LOC_Os11g27329	1.2	0.435	-1.46395	0.997284	GO:0031410//cytoplasmic vesicle;GO:0043231//intracellular membrane-bounded organelle	-	-	K16296|1|0.0|943|osa:9269030|serine carboxypeptidase-like clade I [EC:3.4.16.-]	cDNA|OsSCP62 - Putative Serine Carboxypeptidase homologue, expressed
LOC_Os02g02120	1.795	0.65	-1.46547	0.999944	-	GO:0046872//metal ion binding;GO:0004672//protein kinase activity;GO:0032559//adenyl ribonucleotide binding	GO:0006464//cellular protein modification process	K04733|1|0.0|730|ats:F775_08720|interleukin-1 receptor-associated kinase 4 [EC:2.7.11.1]	cDNA|OsWAK11 - OsWAK receptor-like protein kinase, expressed
LOC_Os03g29190	1.94	0.7	-1.47063	0.997342	-	GO:0016668//oxidoreductase activity, acting on a sulfur group of donors, NAD(P) as acceptor	GO:0008152//metabolic process;GO:0019725//cellular homeostasis	K17609|1|0.0|1038|dosa:Os03t0405500-01|nucleoredoxin [EC:1.8.1.8]	cDNA|PDI, putative, expressed
LOC_Os01g74340	3.48	1.255	-1.4714	0.991148	GO:0043231//intracellular membrane-bounded organelle	GO:0005488//binding	-	K11251|1|8e-30|131|bdi:100842023|histone H2A;K13195|4|2e-22|106|mdm:103447736|cold-inducible RNA-binding protein	cDNA|RNA recognition motif containing protein, putative, expressed
LOC_Os04g23440	8.485	3.055	-1.47374	0.998993	GO:0043231//intracellular membrane-bounded organelle	-	-	K13422|1|4e-12|74.3|pda:103704709|transcription factor MYC2	cDNA|helix-loop-helix DNA-binding domain containing protein, expressed
LOC_Os12g43670	1.125	0.405	-1.47393	0.986072	GO:0043231//intracellular membrane-bounded organelle;GO:0031224//intrinsic component of membrane	-	-	-	cDNA|ergosterol biosynthetic protein 28, putative, expressed
LOC_Os07g42310	1.835	0.66	-1.47524	0.998694	-	-	-	-	cDNA|lung seven transmembrane domain containing protein, putative, expressed
LOC_Os05g06250	1.03	0.37	-1.47705	0.981666	-	-	-	-	cDNA|expressed protein
LOC_Os07g35004	3.815	1.37	-1.47751	0.996652	-	-	-	K04733|1|4e-159|563|sita:101771977|interleukin-1 receptor-associated kinase 4 [EC:2.7.11.1]	cDNA|TKL_IRAK_DUF26-la.4 - DUF26 kinases have homology to DUF26 containing loci, expressed
LOC_Os01g64020	1.365	0.49	-1.47805	0.995735	-	GO:0005488//binding;GO:0005488//binding;GO:0003677//DNA binding;GO:0005488//binding	GO:0006351//transcription, DNA-templated	K14431|1|0.0|817|dosa:Os01t0859500-01|transcription factor TGA	cDNA|transcription factor, putative, expressed
LOC_Os08g02110	3.18	1.14	-1.47999	1	GO:0031410//cytoplasmic vesicle	GO:0046872//metal ion binding;GO:0003824//catalytic activity	-	K00430|1|1e-140|500|dosa:Os08t0113000-01|peroxidase [EC:1.11.1.7]	cDNA|peroxidase precursor, putative, expressed
LOC_Os02g47920	1.315	0.47	-1.48433	0.990733	GO:0044464	GO:0046914//transition metal ion binding;GO:0004518//nuclease activity	-	K18327|1|1e-107|390|csv:101218380|RNA exonuclease 4 [EC:3.1.-.-]	cDNA|ZOS2-16 - C2H2 zinc finger protein, expressed
LOC_Os04g39350	8.37	2.99	-1.48508	1	-	-	-	K19307|1|6e-08|58.5|sot:102600672|25S rRNA (uracil2634-N3)-methyltransferase [EC:2.1.1.313]	cDNA|heavy metal associated domain containing protein, expressed
LOC_Os01g03144	1.99	0.71	-1.48688	0.999421	GO:0043231//intracellular membrane-bounded organelle	-	-	-	cDNA|white-brown complex homolog protein 7, putative, expressed
LOC_Os02g10950	6.115	2.18	-1.48802	0.998601	-	-	-	-	cDNA|expressed protein
LOC_Os05g26840	22.055	7.82	-1.49587	1	GO:0044464	-	GO:0006810//transport	K06901|1|0.0|997|osa:4338446|putative MFS transporter, AGZA family, xanthine/uracil permease	cDNA|permease domain containing protein, putative, expressed
LOC_Os10g34150	1.51	0.53	-1.51048	0.985878	-	-	-	K07192|1|0.0|737|obr:102700461|flotillin	cDNA|nodulin, putative, expressed
LOC_Os12g16540	5.245	1.84	-1.51124	0.998945	GO:0031410//cytoplasmic vesicle	GO:0005488//binding	-	K04733|1|2e-54|214|sbi:SORBI_07g014870|interleukin-1 receptor-associated kinase 4 [EC:2.7.11.1]	cDNA|OsWAK124 - OsWAK receptor-like protein OsWAK-RLP, expressed
LOC_Os03g60890	75.445	26.445	-1.51243	1	-	-	-	-	cDNA|calmodulin binding protein, putative, expressed
LOC_Os01g48950	3.205	1.12	-1.51683	0.995012	-	-	-	-	cDNA|expressed protein
LOC_Os01g60730	25.305	8.84	-1.5173	1	-	GO:0046872//metal ion binding;GO:0046872//metal ion binding	-	K19040|1|2e-22|107|jcu:105649180|E3 ubiquitin-protein ligase ATL10/75/76/77/78 [EC:2.3.2.27]	cDNA|RING-H2 finger protein, putative, expressed
LOC_Os08g33740	1.605	0.56	-1.51907	0.995553	-	-	-	K13680|1|0.0|809|ats:F775_14200|beta-mannan synthase [EC:2.4.1.32]	cDNA|CSLA11 - cellulose synthase-like family A, expressed
LOC_Os11g32090	2.365	0.825	-1.51937	0.98153	-	-	-	K05956|1|2e-55|215|dosa:Os11t0523500-00|geranylgeranyl transferase type-2 subunit beta [EC:2.5.1.60]	cDNA|geranylgeranyl transferase type-2 subunit beta, putative, expressed
LOC_Os07g31430	1.21	0.42	-1.52655	0.995307	GO:0031410//cytoplasmic vesicle	-	-	-	cDNA|phosphate-induced protein 1 conserved region domain containing protein, expressed
LOC_Os06g10750	1.715	0.595	-1.52725	0.998667	-	-	-	K00801|1|3e-23|111|ats:F775_23930|farnesyl-diphosphate farnesyltransferase [EC:2.5.1.21]	cDNA|integral membrane protein DUF6 containing protein, expressed
LOC_Os12g41710	4.42	1.51	-1.5495	0.999841	-	GO:0004871//signal transducer activity;GO:0004672//protein kinase activity;GO:0032559//adenyl ribonucleotide binding;GO:0004871//signal transducer activity;GO:0004672//protein kinase activity;GO:0032559//adenyl ribonucleotide binding	GO:0006464//cellular protein modification process;GO:0006464//cellular protein modification process	K04733|1|5e-180|632|sita:101754056|interleukin-1 receptor-associated kinase 4 [EC:2.7.11.1]	cDNA|Protein kinase domain containing protein, expressed
LOC_Os10g34930	2.7	0.92	-1.55325	0.995195	GO:0031410//cytoplasmic vesicle	-	-	K04733|1|2e-58|227|sita:101754313|interleukin-1 receptor-associated kinase 4 [EC:2.7.11.1]	cDNA|secretory protein, putative, expressed
LOC_Os03g55530	1.925	0.655	-1.55529	0.998721	-	GO:0016407//acetyltransferase activity	-	-	cDNA|HLS, putative, expressed
LOC_Os06g11330	20.925	7.1	-1.55934	1	-	-	-	K09260|1|3e-56|220|sbi:SORBI_10g007380|MADS-box transcription enhancer factor 2A	cDNA|OsMADS55 - MADS-box family gene with MIKCc type-box, expressed
LOC_Os09g11480	35.425	11.97	-1.56534	1	-	-	-	K09286|1|2e-15|85.1|ats:F775_15852|EREBP-like factor	cDNA|AP2 domain containing protein, expressed
LOC_Os12g02540	4.93	1.655	-1.57476	0.998328	GO:0043231//intracellular membrane-bounded organelle;GO:0043231//intracellular membrane-bounded organelle;GO:0043231//intracellular membrane-bounded organelle	GO:0060089;GO:0060089;GO:0060089	GO:0023052//signaling;GO:0009314//response to radiation;GO:0023052//signaling;GO:0009314//response to radiation;GO:0023052//signaling;GO:0009314//response to radiation	K10523|1|4e-28|127|ats:F775_16894|speckle-type POZ protein	cDNA|BTBN23 - Bric-a-Brac, Tramtrack, Broad Complex BTB domain with non-phototropic hypocotyl 3 NPH3 and coiled-coil domains, expressed
LOC_Os02g11130	7.75	2.59	-1.58124	0.999851	GO:0043231//intracellular membrane-bounded organelle;GO:0043231//intracellular membrane-bounded organelle;GO:0043231//intracellular membrane-bounded organelle;GO:0043231//intracellular membrane-bounded organelle	GO:0016740//transferase activity;GO:0016740//transferase activity;GO:0016740//transferase activity;GO:0016740//transferase activity	-	K13496|1|8e-114|412|pda:103708834|UDP-glucosyl transferase 73C [EC:2.4.1.-]	cDNA|cytokinin-O-glucosyltransferase 3, putative, expressed
LOC_Os04g53850	2.69	0.895	-1.58765	0.996304	-	-	-	K08695|1|0.0|654|dosa:Os04t0630800-01|anthocyanidin reductase [EC:1.3.1.77]	cDNA|leucoanthocyanidin reductase, putative, expressed
LOC_Os08g28740	2.71	0.9	-1.5903	0.998224	-	-	-	-	cDNA|expressed protein
LOC_Os11g40420	1.285	0.425	-1.59623	0.996864	-	-	-	-	cDNA|expressed protein
LOC_Os12g16080	1.3	0.425	-1.61298	0.996593	GO:0044464	-	-	-	cDNA|expressed protein
LOC_Os06g29844	1.99	0.65	-1.61426	0.999706	GO:0044464	GO:0015291//secondary active transmembrane transporter activity	GO:0015893//drug transport	K03327|1|0.0|851|dosa:Os06t0494400-01|multidrug resistance protein, MATE family	cDNA|MATE efflux family protein, putative, expressed
LOC_Os11g40970	1.21	0.395	-1.61508	0.998903	GO:0031410//cytoplasmic vesicle	GO:0004672//protein kinase activity;GO:0000166//nucleotide binding	-	K20181|1|0.0|653|mtr:MTR_5g026090|vacuolar protein sorting-associated protein 18;K13437|3|6e-179|629|osa:107276510|receptor kinase-like protein;K13420|5|1e-177|625|tcc:TCM_029651|LRR receptor-like serine/threonine-protein kinase FLS2 [EC:2.7.11.1]	cDNA|receptor-like protein kinase precursor, putative, expressed
LOC_Os01g23710	9.43	3.065	-1.62137	1	GO:0043231//intracellular membrane-bounded organelle	-	-	-	cDNA|no apical meristem protein, putative, expressed
LOC_Os12g33120	963.465	312.73	-1.62331	1	GO:0043231//intracellular membrane-bounded organelle	-	-	-	cDNA|expressed protein
LOC_Os11g34920	2.715	0.88	-1.62538	1	-	-	-	K13457|1|8e-143|509|ats:F775_33181|disease resistance protein RPM1	cDNA|stripe rust resistance protein Yr10, putative, expressed
LOC_Os11g26760	1.545	0.5	-1.62761	0.995736	-	-	-	-	cDNA|dehydrin, putative, expressed
LOC_Os11g29970	1.41	0.455	-1.63176	0.999819	-	-	-	K19613|1|1e-135|486|sbi:SORBI_01g015900|leucine-rich repeat protein SHOC2;K15078|2|7e-102|374|gra:105772718|structure-specific endonuclease subunit SLX1 [EC:3.6.1.-]	cDNA|NB-ARC domain containing protein, expressed
LOC_Os02g03830	1.365	0.44	-1.63333	0.99633	-	-	-	-	cDNA|expressed protein
LOC_Os01g12440	1.01	0.325	-1.63584	0.994831	-	-	-	K09286|1|5e-26|120|csv:101219993|EREBP-like factor	cDNA|AP2 domain containing protein, expressed
LOC_Os11g40840	1.28	0.41	-1.64245	0.998709	GO:0031410//cytoplasmic vesicle;GO:0031410//cytoplasmic vesicle;GO:0031410//cytoplasmic vesicle	-	-	K20181|1|3e-122|334|mtr:MTR_5g026090|vacuolar protein sorting-associated protein 18;K13437|5|3e-117|353|osa:107276510|receptor kinase-like protein	cDNA|receptor-like protein kinase 2 precursor, putative, expressed
LOC_Os01g03690	1.76	0.56	-1.65208	0.987647	-	GO:0004672//protein kinase activity;GO:0032559//adenyl ribonucleotide binding	GO:0006464//cellular protein modification process	K04733|1|5e-163|575|bdi:100832551|interleukin-1 receptor-associated kinase 4 [EC:2.7.11.1]	cDNA|TKL_IRAK_DUF26-lg.1 - DUF26 kinases have homology to DUF26 containing loci, expressed
LOC_Os12g03740	1.655	0.525	-1.65644	0.99819	-	-	-	K14320|1|3e-41|169|dosa:Os11t0132700-01|aladin	cDNA|OsFBX438 - F-box domain containing protein, expressed
LOC_Os08g41620	1.485	0.47	-1.65973	0.995445	-	-	-	K11844|1|1e-155|550|dosa:Os08t0527900-00|ubiquitin carboxyl-terminal hydrolase 16/45 [EC:3.4.19.12]	cDNA|ubiquitin carboxyl-terminal hydrolase family protein, expressed
LOC_Os08g03350	6.72	2.125	-1.661	0.999252	GO:0031224//intrinsic component of membrane	-	-	K14209|1|2e-135|484|brp:103868752|solute carrier family 36 (proton-coupled amino acid transporter);K15015|3|3e-58|227|apro:F751_1778|solute carrier family 32 (vesicular inhibitory amino acid transporter)	cDNA|amino acid transporter, putative, expressed
LOC_Os08g01940	28.45	8.995	-1.66123	1	-	-	-	K17108|1|0.0|1639|dosa:Os08t0111200-01|non-lysosomal glucosylceramidase [EC:3.2.1.45]	cDNA|non-lysosomal glucosylceramidase, putative, expressed
LOC_Os06g05740	4.8	1.515	-1.66372	0.998608	GO:0031410//cytoplasmic vesicle	-	-	K11426|1|1e-08|62.0|aly:ARALYDRAFT_343234|SET and MYND domain-containing protein	cDNA|expressed protein
LOC_Os11g37660	1.175	0.37	-1.66706	0.951413	-	-	-	K17911|1|3e-150|532|dosa:Os11t0587000-01|beta-carotene isomerase [EC:5.2.1.14]	cDNA|vegetative storage protein, putative, expressed
LOC_Os12g18090	3.05	0.955	-1.67524	0.969117	-	-	-	-	cDNA|expressed protein
LOC_Os11g43520	4.94	1.54	-1.68158	0.996905	GO:0031410//cytoplasmic vesicle	GO:0015036//disulfide oxidoreductase activity	GO:0019725//cellular homeostasis	K03676|1|1e-50|200|dosa:Os11t0655900-01|glutaredoxin 3	cDNA|OsGrx_C17 - glutaredoxin subgroup III, expressed
LOC_Os01g46800	10.815	3.37	-1.68221	1	-	GO:0003676//nucleic acid binding	-	K16225|1|3e-16|87.8|crb:CARUB_v10025742mg|probable WRKY transcription factor 52;K13459|2|2e-15|84.7|adu:107468800|disease resistance protein RPS2;K13425|4|8e-14|79.7|adu:107488158|WRKY transcription factor 22	cDNA|WRKY15, expressed
LOC_Os07g03870	1.605	0.5	-1.68257	0.99928	GO:0031410//cytoplasmic vesicle	GO:0004672//protein kinase activity;GO:0000166//nucleotide binding	-	K04733|1|0.0|813|sbi:SORBI_10g011150|interleukin-1 receptor-associated kinase 4 [EC:2.7.11.1]	cDNA|receptor like protein kinase, putative, expressed
LOC_Os05g51040	2.055	0.64	-1.68299	0.997195	-	-	-	-	cDNA|tesmin/TSO1-like CXC domain containing protein, expressed
LOC_Os01g02800	1.285	0.4	-1.6837	0.998288	GO:0043231//intracellular membrane-bounded organelle;GO:0031410//cytoplasmic vesicle	GO:0004672//protein kinase activity;GO:0000166//nucleotide binding	-	K04733|1|0.0|674|dosa:Os01t0116800-00|interleukin-1 receptor-associated kinase 4 [EC:2.7.11.1]	cDNA|receptor-like kinase ARK1AS, putative, expressed
LOC_Os02g29774	1.165	0.36	-1.69426	0.98899	GO:0031410//cytoplasmic vesicle	-	-	-	cDNA|expressed protein
LOC_Os12g39360	45.42	14.015	-1.69636	1	GO:0031410//cytoplasmic vesicle;GO:0031410//cytoplasmic vesicle	-	-	K02882|1|2e-29|132|adu:107496420|large subunit ribosomal protein L18Ae;K01381|3|9e-18|94.4|smo:SELMODRAFT_13348|saccharopepsin [EC:3.4.23.25];K19025|5|2e-15|86.7|tcc:TCM_030990|AP-5 complex subunit zeta-1	cDNA|aspartic proteinase nepenthesin precursor, putative, expressed
LOC_Os06g06300	1.17	0.36	-1.70044	0.998439	-	-	-	K16223|1|4e-98|358|dosa:Os06t0157500-00|protein FLOWERING LOCUS T	cDNA|osFTL3 FT-Like3 homologous to Flowering Locus T gene; contains Pfam profile PF01161: Phosphatidylethanolamine-binding protein, expressed
LOC_Os08g26840	7.02	2.16	-1.70044	0.999694	-	-	-	K06997|1|8e-30|133|ats:F775_00912|PLP dependent protein	cDNA|plant protein of unknown function domain containing protein, expressed
LOC_Os05g34800	1.125	0.345	-1.70526	0.995579	-	-	-	K01062|1|9e-08|60.5|smo:SELMODRAFT_441340|platelet-activating factor acetylhydrolase [EC:3.1.1.47]	cDNA|expressed protein
LOC_Os02g09050	8.5	2.605	-1.70618	0.998727	-	-	-	-	cDNA|expressed protein
LOC_Os10g36848	1.195	0.365	-1.71104	0.995	-	GO:0016491//oxidoreductase activity;GO:0005506//iron ion binding	-	K09755|1|0.0|876|dosa:Os10t0512400-01|ferulate-5-hydroxylase [EC:1.14.-.-]	cDNA|cytochrome P450, putative, expressed
LOC_Os01g60850	4.67	1.425	-1.71246	0.999062	GO:0031410//cytoplasmic vesicle	-	-	K16286|1|1e-09|62.4|obr:102702167|E3 ubiquitin-protein ligase EL5 [EC:2.3.2.27];K19038|2|3e-09|61.2|zma:103649584|E3 ubiquitin-protein ligase ATL41 [EC:2.3.2.27]	cDNA|expressed protein
LOC_Os03g32160	1.165	0.355	-1.71444	0.94464	GO:0043231//intracellular membrane-bounded organelle	-	-	-	cDNA|calmodulin binding protein, putative, expressed
LOC_Os03g40770	7.64	2.32	-1.71945	0.999978	-	-	-	-	cDNA|expressed protein
LOC_Os08g08420	3.115	0.945	-1.72085	0.99818	-	-	-	-	cDNA|expressed protein
LOC_Os01g72130	1.95	0.59	-1.72469	0.961312	-	GO:0016740//transferase activity	-	K00799|1|2e-131|468|osa:9269614|glutathione S-transferase [EC:2.5.1.18]	cDNA|glutathione S-transferase, putative, expressed
LOC_Os07g36880	2.72	0.82	-1.72991	0.998691	-	-	-	-	cDNA|expressed protein
LOC_Os01g48640	9.09	2.74	-1.7301	1	GO:0031410//cytoplasmic vesicle	-	-	K10581|1|1e-102|376|egu:105047412|ubiquitin-conjugating enzyme E2 O [EC:2.3.2.24]	cDNA|expressed protein
LOC_Os09g17560	6.74	2.025	-1.73483	0.999084	-	-	-	K13230|1|1e-70|268|zma:100147731|2,4,7-trihydroxy-1,4-benzoxazin-3-one-glucoside 7-O-methyltransferase [EC:2.1.1.241];K16040|2|4e-67|256|vvi:100233030|trans-resveratrol di-O-methyltransferase [EC:2.1.1.240];K13262|3|9e-65|248|vvi:100243529|isoflavone-7-O-methyltransferase [EC:2.1.1.150];K13259|4|5e-63|243|mtr:MTR_4g088190|2,7,4'-trihydroxyisoflavanone 4'-O-methyltransferase / isoflavone 4'-O-meth…	cDNA|O-methyltransferase, putative, expressed
LOC_Os02g36450	11.08	3.32	-1.7387	1	-	-	-	K16055|1|3e-174|612|ats:F775_15846|trehalose 6-phosphate synthase/phosphatase [EC:2.4.1.15 3.1.3.12];K08150|2|2e-34|148|sita:101758845|MFS transporter, SP family, solute carrier family 2 (myo-inositol transporter), member 13	cDNA|transporter family protein, putative, expressed
LOC_Os03g11450	1.645	0.49	-1.74723	0.986822	GO:0043231//intracellular membrane-bounded organelle;GO:0043231//intracellular membrane-bounded organelle;GO:0043231//intracellular membrane-bounded organelle;GO:0043231//intracellular membrane-bounded organelle;GO:0043231//intracellular membrane-bounded organelle	-	-	-	cDNA|expressed protein
LOC_Os08g15149	1322.42	392.23	-1.75341	1	-	-	-	K06892|1|3e-28|127|thj:104810332|feruloyl-CoA ortho-hydroxylase [EC:1.14.11.-];K05282|4|9e-28|125|thj:104818267|gibberellin 20-oxidase [EC:1.14.11.12]	cDNA|oxidoreductase, 2OG-Fe oxygenase family protein, expressed
LOC_Os05g34980	3.34	0.975	-1.77637	0.999203	GO:0031224//intrinsic component of membrane	-	-	K14209|1|3e-136|486|adu:107457692|solute carrier family 36 (proton-coupled amino acid transporter)	cDNA|amino acid transporter, putative, expressed
LOC_Os09g39150	1.87	0.545	-1.77871	0.970648	-	-	-	K13681|1|6e-43|177|ats:F775_18834|xyloglucan fucosyltransferase [EC:2.4.1.-];K18674|2|3e-42|175|vra:106763568|N-acetylgalactosamine kinase [EC:2.7.1.157];K03013|3|1e-18|97.1|cit:102620712|DNA-directed RNA polymerases I, II, and III subunit RPABC1;K14300|4|3e-18|95.5|pda:103721930|nuclear pore complex protein Nup133;K14491|5|5e-16|88.2|gmx:100784053|two-component response regulator ARR-B family	cDNA|transposon protein, putative, CACTA, En/Spm sub-class, expressed
LOC_Os06g12460	1.36	0.395	-1.78368	0.995654	GO:0044464	-	-	K13680|1|3e-166|586|egu:105041738|beta-mannan synthase [EC:2.4.1.32]	cDNA|CSLA3 - cellulose synthase-like family A; mannan synthase, expressed
LOC_Os04g37720	1.845	0.535	-1.78601	0.999522	GO:0043231//intracellular membrane-bounded organelle	-	-	K17964|1|4e-37|157|ats:F775_25862|leucine-rich PPR motif-containing protein, mitochondrial;K17710|3|9e-15|82.8|pda:103701530|pentatricopeptide repeat domain-containing protein 1	cDNA|pentatricopeptide, putative, expressed
LOC_Os07g09010	2.415	0.7	-1.7866	0.999473	GO:0044464	-	-	K14794|1|2e-87|324|aly:ARALYDRAFT_321151|ribosomal RNA-processing protein 12	cDNA|nodulin, putative, expressed
LOC_Os04g39010	3.225	0.93	-1.794	0.996682	-	-	-	-	cDNA|heavy metal associated domain containing protein, expressed
LOC_Os11g47460	17.625	5.075	-1.79614	1	GO:0043231//intracellular membrane-bounded organelle	GO:0003676//nucleic acid binding	-	K09422|1|5e-135|481|dosa:Os11t0700500-01|myb proto-oncogene protein, plant	cDNA|MYB family transcription factor, putative, expressed
LOC_Os09g16950	8.43	2.42	-1.80053	1	-	GO:0004672//protein kinase activity;GO:0000166//nucleotide binding	-	K04730|1|1e-123|444|ats:F775_23583|interleukin-1 receptor-associated kinase 1 [EC:2.7.11.1];K01176|3|6e-114|412|sita:101774437|alpha-amylase [EC:3.2.1.1]	cDNA|cysteine-rich receptor-like protein kinase 25 precursor, putative, expressed
LOC_Os05g07940	11.665	3.34	-1.80427	0.998966	-	GO:0003824//catalytic activity	-	K14611|1|3e-64|246|mus:103986044|solute carrier family 23 (nucleobase transporter), member 1/2;K08234|2|8e-11|69.7|fve:101305877|glyoxylase I family protein	cDNA|glyoxalase family protein, putative, expressed
LOC_Os07g06130	1.07	0.305	-1.81073	0.954789	GO:0031410//cytoplasmic vesicle	-	GO:0051234//establishment of localization	K14513|1|0.0|2192|dosa:Os07t0155600-01|ethylene-insensitive protein 2	cDNA|ethylene-insensitive protein, putative, expressed
LOC_Os05g31570	2.335	0.665	-1.812	0.999859	-	-	-	K15078|1|6e-151|536|vvi:100255136|structure-specific endonuclease subunit SLX1 [EC:3.6.1.-]	cDNA|disease resistance protein RGA4, putative, expressed
LOC_Os02g11960	1.9	0.53	-1.84194	0.997544	GO:0044464	-	-	K05643|1|4e-152|540|apro:F751_1115|ATP-binding cassette, subfamily A (ABC1), member 3	cDNA|ABC transporter, ATP-binding protein, putative, expressed
LOC_Os01g12464	1.3	0.36	-1.85244	0.999947	-	-	-	K15119|1|3e-09|63.2|obr:102718132|solute carrier family 25, member 39/40	cDNA|CHCH domain containing protein, expressed
LOC_Os01g29330	4.285	1.18	-1.86051	0.996732	GO:0043231//intracellular membrane-bounded organelle	-	-	K08145|1|1e-10|68.9|pxb:108865635|MFS transporter, SP family, solute carrier family 2 (facilitated glucose transporter), member 8	cDNA|expressed protein
LOC_Os11g44680	1.465	0.4	-1.87283	0.996874	-	-	-	K04733|1|3e-10|68.6|sita:101784675|interleukin-1 receptor-associated kinase 4 [EC:2.7.11.1]	cDNA|calmodulin binding protein, putative, expressed
LOC_Os01g47900	3.025	0.825	-1.87447	0.99966	GO:0031410//cytoplasmic vesicle	GO:0030246//carbohydrate binding;GO:0004672//protein kinase activity;GO:0032559//adenyl ribonucleotide binding	GO:0006464//cellular protein modification process;GO:0008037//cell recognition	K04733|1|0.0|780|bvg:104888982|interleukin-1 receptor-associated kinase 4 [EC:2.7.11.1]	cDNA|S-locus-like receptor protein kinase, putative, expressed
LOC_Os08g16540	1.54	0.42	-1.87447	0.996921	-	-	-	-	cDNA|retrotransposon protein, putative, unclassified, expressed
LOC_Os12g43580	1.065	0.29	-1.87673	0.999205	-	-	-	K12486|1|9e-09|63.5|zma:103636947|stromal membrane-associated protein	cDNA|expressed protein
LOC_Os10g38740	13.82	3.755	-1.87987	1	-	-	-	K00799|1|2e-106|386|dosa:Os10t0530900-01|glutathione S-transferase [EC:2.5.1.18]	cDNA|glutathione S-transferase, putative, expressed
LOC_Os01g18744	1.035	0.28	-1.88613	0.992455	-	-	-	K19861|1|2e-39|164|bvg:104902912|benzyl alcohol O-benzoyltransferase [EC:2.3.1.196 2.3.1.232]	cDNA|transferase family protein, putative, expressed
LOC_Os06g28050	8.01	2.16	-1.89077	1	GO:0043231//intracellular membrane-bounded organelle	-	-	K08244|1|7e-105|381|ats:F775_04069|alpha-glucan, water dikinase [EC:2.7.9.4];K05337|2|7e-19|95.9|olu:OSTLU_7956|ferredoxin	cDNA|expressed protein
LOC_Os01g71350	1.7	0.455	-1.9016	0.998531	GO:0031410//cytoplasmic vesicle	GO:0016798//hydrolase activity, acting on glycosyl bonds	GO:0044238//primary metabolic process	K19891|1|4e-49|196|crb:CARUB_v10019481mg|glucan endo-1,3-beta-glucosidase 1/2/3 [EC:3.2.1.39]	cDNA|glycosyl hydrolases family 17, putative, expressed
LOC_Os02g55520	14.775	3.935	-1.90872	1	GO:0043231//intracellular membrane-bounded organelle;GO:0043231//intracellular membrane-bounded organelle	GO:0046914//transition metal ion binding	-	-	cDNA|zinc finger, C3HC4 type domain containing protein, expressed
LOC_Os07g03930	1.015	0.27	-1.91045	0.995683	GO:0031410//cytoplasmic vesicle	GO:0005488//binding	-	K04733|1|0.0|721|sbi:SORBI_10g011150|interleukin-1 receptor-associated kinase 4 [EC:2.7.11.1]	cDNA|lectin-like receptor kinase, putative, expressed
LOC_Os04g06520	2.29	0.6	-1.93231	0.997196	-	-	-	-	cDNA|expressed protein
LOC_Os03g46070	1.875	0.49	-1.93604	1	GO:0031410//cytoplasmic vesicle	-	-	K04733|1|7e-78|291|ats:F775_00388|interleukin-1 receptor-associated kinase 4 [EC:2.7.11.1]	cDNA|thaumatin, putative, expressed
LOC_Os02g36830	1.495	0.39	-1.9386	0.995311	GO:0043231//intracellular membrane-bounded organelle	GO:0016757//transferase activity, transferring glycosyl groups	-	K13030|1|9e-109|395|sbi:SORBI_01g001220|cyanohydrin beta-glucosyltransferase [EC:2.4.1.85];K00699|4|5e-64|246|spen:107013955|glucuronosyltransferase [EC:2.4.1.17]	cDNA|cytokinin-O-glucosyltransferase 2, putative, expressed
LOC_Os12g35340	21.905	5.695	-1.94349	1	GO:0031410//cytoplasmic vesicle	GO:0015036//disulfide oxidoreductase activity	GO:0019725//cellular homeostasis	K03676|1|8e-53|208|dosa:Os12t0538700-01|glutaredoxin 3	cDNA|OsGrx_C11 - glutaredoxin subgroup III, expressed
LOC_Os07g46846	3.815	0.99	-1.94618	0.999245	GO:0043231//intracellular membrane-bounded organelle	GO:0003824//catalytic activity	GO:0008152//metabolic process	K13070|1|1e-55|218|osa:4335093|momilactone-A synthase [EC:1.1.1.295];K09841|2|3e-51|203|sbi:SORBI_01g003880|xanthoxin dehydrogenase [EC:1.1.1.288]	cDNA|sex determination protein tasselseed-2, putative, expressed
LOC_Os08g08430	1.86	0.48	-1.9542	0.999408	-	-	-	-	cDNA|expressed protein
LOC_Os06g44180	15.295	3.935	-1.95862	1	-	GO:0005488//binding;GO:0048037//cofactor binding	GO:0008152//metabolic process;GO:0008152//metabolic process	K08695|1|8e-24|112|ats:F775_22907|anthocyanidin reductase [EC:1.3.1.77];K13082|2|2e-21|104|bdi:100845692|bifunctional dihydroflavonol 4-reductase/flavanone 4-reductase [EC:1.1.1.219 1.1.1.234]	cDNA|NAD dependent epimerase/dehydratase family protein, putative, expressed
LOC_Os03g03790	5.365	1.38	-1.95891	1	-	-	-	K00666|1|7e-127|456|sbi:SORBI_10g012080|fatty-acyl-CoA synthase [EC:6.2.1.-];K12261|5|9e-39|163|gsl:Gasu_12440|2-hydroxyacyl-CoA lyase 1 [EC:4.1.-.-]	cDNA|AMP-binding domain containing protein, expressed
LOC_Os01g41810	3.17	0.815	-1.95961	0.999514	-	GO:0016491//oxidoreductase activity;GO:0005506//iron ion binding	GO:0006091//generation of precursor metabolites and energy	K07426|1|4e-146|519|cam:101499206|cytochrome P450 family 4 subfamily B polypeptide 1 [EC:1.14.14.1];K07428|2|3e-137|490|sot:102584840|cytochrome P450 family 4 subfamily X [EC:1.14.14.1]	cDNA|cytochrome P450 72A1, putative, expressed
LOC_Os07g15440	5.935	1.525	-1.96044	1	-	-	-	K01872|1|1e-41|172|sita:101754965|alanyl-tRNA synthetase [EC:6.1.1.7]	cDNA|alanyl-tRNA synthetase family protein, expressed
LOC_Os06g45580	1.285	0.33	-1.96123	0.999516	-	GO:0046872//metal ion binding	-	K19040|1|3e-23|110|jcu:105649110|E3 ubiquitin-protein ligase ATL10/75/76/77/78 [EC:2.3.2.27]	cDNA|RING-H2 finger protein, putative, expressed
LOC_Os05g05730	3.665	0.94	-1.96308	0.998711	-	-	-	K03676|1|5e-43|173|dosa:Os05t0149950-00|glutaredoxin 3	cDNA|OsGrx_S1 - glutaredoxin subgroup III, expressed
LOC_Os03g11734	2.25	0.575	-1.96829	0.999955	GO:0044464;GO:0044464;GO:0044464	GO:0015291//secondary active transmembrane transporter activity;GO:0015291//secondary active transmembrane transporter activity;GO:0015291//secondary active transmembrane transporter activity	GO:0015893//drug transport;GO:0015893//drug transport;GO:0015893//drug transport	K20456|1|1e-77|292|smo:SELMODRAFT_417928|oxysterol-binding protein 1	cDNA|MATE efflux protein, putative, expressed
LOC_Os06g46149	7.27	1.845	-1.97833	0.999999	-	-	-	-	cDNA|serine/arginine repetitive matrix protein 1, putative, expressed
LOC_Os04g53580	1.225	0.31	-1.98244	0.996973	-	-	-	-	cDNA|P21-Rho-binding domain containing protein, putative, expressed
LOC_Os02g13290	1.325	0.33	-2.00545	0.98817	-	-	-	K13248|1|4e-136|485|dosa:Os02t0226200-01|pyridoxal phosphate phosphatase PHOSPHO2 [EC:3.1.3.74]	cDNA|phosphoethanolamine/phosphocholine phosphatase, putative, expressed
LOC_Os11g41034	19.295	4.8	-2.00712	1	-	-	-	-	cDNA|expressed protein
LOC_Os02g12380	2.015	0.5	-2.01078	1	GO:0043231//intracellular membrane-bounded organelle;GO:0043231//intracellular membrane-bounded organelle	GO:0017136//NAD-dependent histone deacetylase activity;GO:0017136//NAD-dependent histone deacetylase activity	GO:0006476//protein deacetylation;GO:0006325//chromatin organization;GO:0006476//protein deacetylation;GO:0006325//chromatin organization	K06067|1|0.0|965|osa:4328720|histone deacetylase 1/2 [EC:3.5.1.98]	cDNA|histone deacetylase, putative, expressed
LOC_Os06g38340	1.905	0.47	-2.01906	0.999579	GO:0031410//cytoplasmic vesicle	-	-	K13420|1|0.0|667|tcc:TCM_031983|LRR receptor-like serine/threonine-protein kinase FLS2 [EC:2.7.11.1]	cDNA|receptor-like protein kinase precursor, putative, expressed
LOC_Os06g11800	15.8	3.87	-2.02952	1	-	GO:0005543//phospholipid binding;GO:0046872//metal ion binding	-	K17095|1|7e-114|411|nnu:104605972|annexin A7/11	cDNA|annexin, putative, expressed
LOC_Os01g18970	5.67	1.385	-2.03346	0.997684	-	-	-	K00430|1|7e-28|123|obr:102714332|peroxidase [EC:1.11.1.7]	cDNA|peroxidase precursor, putative, expressed
LOC_Os11g17330	1.045	0.255	-2.03493	0.999598	GO:0043231//intracellular membrane-bounded organelle;GO:0031410//cytoplasmic vesicle;GO:0043231//intracellular membrane-bounded organelle;GO:0031410//cytoplasmic vesicle	-	-	K13457|1|1e-156|555|bdi:100824945|disease resistance protein RPM1	cDNA|stripe rust resistance protein Yr10, putative, expressed
LOC_Os04g38530	2.08	0.505	-2.04223	0.999031	GO:0031410//cytoplasmic vesicle	GO:0003824//catalytic activity;GO:0005488//binding	GO:0005996//monosaccharide metabolic process	K01785|1|0.0|652|dosa:Os04t0458300-01|aldose 1-epimerase [EC:5.1.3.3]	cDNA|aldose 1-epimerase, putative, expressed
LOC_Os01g32460	5.87	1.4	-2.06793	0.999517	-	-	-	-	cDNA|expressed protein
LOC_Os08g37500	2.465	0.585	-2.07508	0.999354	-	-	-	K20283|1|3e-15|84.7|rcu:8264910|golgin subfamily A member 4;K20478|4|1e-11|72.8|sind:105159034|golgin subfamily B member 1	cDNA|expressed protein
LOC_Os01g36580	1.48	0.35	-2.08017	0.995546	GO:0044464;GO:0044464	-	-	K00801|1|1e-16|89.0|ats:F775_23930|farnesyl-diphosphate farnesyltransferase [EC:2.5.1.21]	cDNA|auxin-induced protein 5NG4, putative, expressed
LOC_Os07g48010	1.675	0.395	-2.08424	0.995032	GO:0031410//cytoplasmic vesicle	GO:0016209//antioxidant activity;GO:0005506//iron ion binding;GO:0003824//catalytic activity	GO:0006950//response to stress;GO:0008152//metabolic process	K00430|1|2e-155|550|dosa:Os07t0677100-01|peroxidase [EC:1.11.1.7]	cDNA|peroxidase precursor, putative, expressed
LOC_Os07g22840	1.04	0.245	-2.08573	0.99803	-	GO:0046914//transition metal ion binding	-	K03358|1|2e-51|203|dosa:Os07t0411200-01|anaphase-promoting complex subunit 11	cDNA|anaphase-promoting complex subunit 11, putative, expressed
LOC_Os01g47760	12	2.825	-2.08671	1	-	-	-	K07390|1|2e-25|117|thj:104812618|monothiol glutaredoxin;K03676|2|5e-24|112|lja:Lj6g3v2006480.1|glutaredoxin 3	cDNA|OsGrx_I1 - glutaredoxin subgroup III, expressed
LOC_Os08g24770	1.45	0.34	-2.09245	0.998708	GO:0031410//cytoplasmic vesicle;GO:0031410//cytoplasmic vesicle;GO:0043231//intracellular membrane-bounded organelle;GO:0031410//cytoplasmic vesicle;GO:0043231//intracellular membrane-bounded organelle;GO:0031410//cytoplasmic vesicle;GO:0031410//cytoplasmic vesicle	GO:0004672//protein kinase activity;GO:0000166//nucleotide binding;GO:0004672//protein kinase activity;GO:0000166//nucleotide binding	-	K04730|1|3e-41|170|sita:101786090|interleukin-1 receptor-associated kinase 1 [EC:2.7.11.1];K04733|2|2e-40|167|sbi:SORBI_10g023375|interleukin-1 receptor-associated kinase 4 [EC:2.7.11.1]	cDNA|protein kinase, putative, expressed
LOC_Os11g11960	6.72	1.565	-2.1023	1	-	GO:0032559//adenyl ribonucleotide binding	GO:0012501//programmed cell death;GO:0006950//response to stress	K13457|1|0.0|1716|osa:9267892|disease resistance protein RPM1	cDNA|disease resistance protein RPM1, putative, expressed
LOC_Os01g71620	1.505	0.35	-2.10434	0.965675	-	-	-	-	cDNA|expressed protein
LOC_Os03g17780	2.11	0.49	-2.10639	0.997262	-	-	-	-	cDNA|WD domain, G-beta repeat domain containing protein, expressed
LOC_Os01g38650	1.725	0.4	-2.10852	0.998353	GO:0043231//intracellular membrane-bounded organelle	-	-	-	cDNA|expressed protein
LOC_Os03g03034	1.88	0.43	-2.12832	0.997296	-	GO:0003824//catalytic activity	GO:0008152//metabolic process	K05278|1|1e-62|241|egr:104450481|flavonol synthase [EC:1.14.11.23];K06892|5|1e-60|235|smo:SELMODRAFT_452904|feruloyl-CoA ortho-hydroxylase [EC:1.14.11.-]	cDNA|flavonol synthase/flavanone 3-hydroxylase, putative, expressed
LOC_Os04g35790	10.56	2.405	-2.1345	0.999084	-	-	-	K07300|1|2e-13|78.2|vcn:VOLCADRAFT_107961|Ca2+:H+ antiporter	cDNA|GLTP domain containing protein, putative, expressed
LOC_Os10g21860	7.47	1.69	-2.14408	0.999732	-	-	-	-	cDNA|expressed protein
LOC_Os01g09830	3.185	0.715	-2.15528	1	-	-	-	K03676|1|7e-38|158|sita:101762867|glutaredoxin 3	cDNA|OsGrx_A2 - glutaredoxin subgroup III, expressed
LOC_Os08g36040	2.32	0.52	-2.15754	0.999719	-	-	-	-	cDNA|plant viral response family protein, putative, expressed
LOC_Os05g44560	6.545	1.45	-2.17434	1	-	-	-	K10406|1|0.0|1785|osa:4339353|kinesin family member C2/C3	cDNA|kinesin motor domain containing protein, expressed
LOC_Os04g14810	3.965	0.865	-2.19655	1	GO:0044464	GO:0005488//binding;GO:0004527//exonuclease activity	GO:0034641	K20777|1|9e-50|197|sita:101773693|exonuclease 3'-5' domain-containing protein 2 [EC:3.1.11.1]	cDNA|3-5 exonuclease domain-containing protein, putative, expressed
LOC_Os05g02420	29.485	6.43	-2.19709	1	-	-	-	K09422|1|9e-60|232|obr:102714188|myb proto-oncogene protein, plant	cDNA|expressed protein
LOC_Os07g47750	1.425	0.31	-2.20062	0.999943	GO:0031410//cytoplasmic vesicle	-	-	-	cDNA|POEI49 - Pollen Ole e I allergen and extensin family protein precursor, expressed
LOC_Os02g13370	1.38	0.3	-2.20163	0.996213	-	-	-	-	cDNA|expressed protein
LOC_Os07g09310	14.555	3.125	-2.21959	1	-	GO:0015036//disulfide oxidoreductase activity	GO:0018904;GO:0019725//cellular homeostasis	K03671|1|2e-69|262|dosa:Os07t0190800-01|thioredoxin 1	cDNA|thioredoxin, putative, expressed
LOC_Os01g61080	1.935	0.415	-2.22115	0.999995	-	GO:0003676//nucleic acid binding	-	K13424|1|0.0|807|dosa:Os01t0826400-01|WRKY transcription factor 33	cDNA|WRKY24, expressed
LOC_Os11g40930	6.67	1.43	-2.22167	0.999737	-	-	-	-	cDNA|expressed protein
LOC_Os06g41380	1.215	0.26	-2.22437	0.997048	-	-	-	-	cDNA|expressed protein
LOC_Os03g42600	11.87	2.505	-2.24444	0.999965	GO:0043231//intracellular membrane-bounded organelle	-	-	-	cDNA|expressed protein
LOC_Os01g02780	1.295	0.265	-2.28889	1	GO:0043231//intracellular membrane-bounded organelle;GO:0031410//cytoplasmic vesicle	GO:0004672//protein kinase activity;GO:0032559//adenyl ribonucleotide binding	GO:0006464//cellular protein modification process	K04733|1|3e-160|561|ats:F775_10321|interleukin-1 receptor-associated kinase 4 [EC:2.7.11.1]	cDNA|TAK33, putative, expressed
LOC_Os10g41999	7.88	1.595	-2.30464	1	GO:0031410//cytoplasmic vesicle;GO:0031410//cytoplasmic vesicle;GO:0031410//cytoplasmic vesicle	-	-	-	cDNA|RALFL27 - Rapid ALkalinization Factor RALF family protein precursor, expressed
LOC_Os01g68300	1473.73	298.29	-2.30469	1	-	-	-	-	cDNA|expressed protein
LOC_Os03g08999	12.225	2.405	-2.34573	1	-	GO:0003824//catalytic activity;GO:0046914//transition metal ion binding	GO:0008152//metabolic process	K00121|1|0.0|723|dosa:Os03t0189400-01|S-(hydroxymethyl)glutathione dehydrogenase / alcohol dehydrogenase [EC:1.1.1.284 1.1.1.1]	cDNA|dehydrogenase, putative, expressed
LOC_Os06g29730	1.35	0.265	-2.3489	0.99711	GO:0031410//cytoplasmic vesicle	-	-	-	cDNA|RALFL28 - Rapid ALkalinization Factor RALF family protein precursor, expressed
LOC_Os06g38450	11.325	2.205	-2.36066	1	GO:0031410//cytoplasmic vesicle	GO:0008233//peptidase activity	-	K01365|1|8e-111|401|bdi:100829371|cathepsin L [EC:3.4.22.15];K16292|3|4e-86|319|bdi:100843107|KDEL-tailed cysteine endopeptidase [EC:3.4.22.-]	cDNA|vignain precursor, putative, expressed
LOC_Os12g09300	19.57	3.775	-2.3741	1	GO:0031224//intrinsic component of membrane	-	-	K14209|1|3e-110|400|vvi:100260163|solute carrier family 36 (proton-coupled amino acid transporter)	cDNA|amino acid transporter, putative, expressed
LOC_Os03g21060	5.475	1.05	-2.38247	1	-	-	-	K01054|1|5e-22|107|bna:106399005|acylglycerol lipase [EC:3.1.1.23];K12581|2|1e-16|89.7|bna:106383523|CCR4-NOT transcription complex subunit 7/8;K13126|3|1e-10|69.7|fve:101312606|polyadenylate-binding protein;K05941|4|2e-06|55.5|mdm:103435918|glutathione gamma-glutamylcysteinyltransferase [EC:2.3.2.15]	cDNA|No apical meristem protein, putative, expressed
LOC_Os10g07040	1.495	0.28	-2.41665	0.999481	-	GO:0016747//transferase activity, transferring acyl groups other than amino-acyl groups	GO:0008152//metabolic process	K17212|1|1e-112|407|zma:100272924|bisdemethoxycurcumin synthase [EC:2.3.1.211]	cDNA|chalcone synthase, putative, expressed
LOC_Os03g20600	1.015	0.19	-2.41741	0.998384	-	-	-	-	cDNA|expressed protein
LOC_Os11g15040	26.75	4.965	-2.42967	1	-	-	-	K08241|1|3e-81|303|bdi:100820884|jasmonate O-methyltransferase [EC:2.1.1.141]	cDNA|S-adenosyl-L-methionine:benzoic acid/salicylic acid carboxyl methyltransferase, putative, expressed
LOC_Os03g29850	12.225	2.255	-2.43864	1	GO:0031224//intrinsic component of membrane	GO:0046915//transition metal ion transmembrane transporter activity	GO:0000041//transition metal ion transport	K14709|1|3e-141|503|dosa:Os03t0411800-01|solute carrier family 39 (zinc transporter), member 1/2/3	cDNA|metal cation transporter, putative, expressed
LOC_Os06g12370	1.955	0.36	-2.4411	0.998958	GO:0043231//intracellular membrane-bounded organelle	GO:0004175//endopeptidase activity;GO:0016462//pyrophosphatase activity;GO:0032559//adenyl ribonucleotide binding	GO:0009057//macromolecule catabolic process;GO:0019538//protein metabolic process	K03798|1|0.0|1076|osa:4340563|cell division protease FtsH [EC:3.4.24.-]	cDNA|OsFtsH6 FtsH protease, homologue of AtFtsH6, expressed
LOC_Os10g31780	3.745	0.685	-2.45079	1	-	GO:0003824//catalytic activity	GO:0008152//metabolic process	K00059|1|2e-117|423|dosa:Os10t0456100-00|3-oxoacyl-[acyl-carrier protein] reductase [EC:1.1.1.100]	cDNA|oxidoreductase, short chain dehydrogenase/reductase family domain containing protein, expressed
LOC_Os07g12890	13.76	2.445	-2.49257	1	GO:0031224//intrinsic component of membrane;GO:0031410//cytoplasmic vesicle	GO:0046915//transition metal ion transmembrane transporter activity	GO:0000041//transition metal ion transport	K14709|1|1e-138|494|osa:4342782|solute carrier family 39 (zinc transporter), member 1/2/3	cDNA|metal cation transporter, putative, expressed
LOC_Os04g59210	16.7	2.925	-2.51334	1	GO:0031410//cytoplasmic vesicle;GO:0031410//cytoplasmic vesicle;GO:0031410//cytoplasmic vesicle	GO:0016209//antioxidant activity;GO:0005506//iron ion binding;GO:0003824//catalytic activity;GO:0046872//metal ion binding;GO:0003824//catalytic activity	GO:0006950//response to stress;GO:0008152//metabolic process	K00430|1|4e-168|593|dosa:Os04t0688600-01|peroxidase [EC:1.11.1.7]	cDNA|peroxidase precursor, putative, expressed
LOC_Os09g17190	1.245	0.215	-2.53374	0.999487	-	-	-	-	cDNA|OsFBX320 - F-box domain containing protein, expressed
LOC_Os03g20330	3.17	0.535	-2.56687	0.999838	-	-	-	-	cDNA|VQ domain containing protein, putative, expressed
LOC_Os02g32814	61.8	10.28	-2.58777	1	-	GO:0046914//transition metal ion binding	GO:0000041//transition metal ion transport	K07213|1|7e-32|138|osa:9272622|copper chaperone	cDNA|heavy metal-associated domain containing protein, expressed
LOC_Os03g55310	1.36	0.225	-2.59561	0.996373	GO:0043231//intracellular membrane-bounded organelle	-	-	K15223|1|2e-22|107|vra:106777012|upstream activation factor subunit UAF30	cDNA|SWIB/MDM2 domain containing protein, expressed
LOC_Os10g39140	6.9	1.14	-2.59756	1	-	GO:0003824//catalytic activity	GO:0008152//metabolic process	K05278|1|1e-61|238|egr:104450481|flavonol synthase [EC:1.14.11.23]	cDNA|flavonol synthase/flavanone 3-hydroxylase, putative, expressed
LOC_Os05g35010	3.18	0.525	-2.59864	0.999756	-	-	-	K07418|1|6e-137|489|obr:102722863|cytochrome P450 family 2 subfamily J [EC:1.14.14.1];K20617|2|2e-92|340|egu:105035265|cytochrome P450 family 71 subfamily A;K00512|4|6e-81|303|sita:101781388|steroid 17alpha-monooxygenase / 17alpha-hydroxyprogesterone deacetylase [EC:1.14.14.19 1.14.14.32]	cDNA|cytochrome P450, putative, expressed
LOC_Os08g08440	2.975	0.49	-2.60204	0.999146	-	-	-	-	cDNA|expressed protein
LOC_Os04g32920	4.96	0.8	-2.63227	1	GO:0044464;GO:0044464;GO:0044464	GO:0046873//metal ion transmembrane transporter activity;GO:0046873//metal ion transmembrane transporter activity;GO:0046873//metal ion transmembrane transporter activity	GO:0030001//metal ion transport;GO:0034220//ion transmembrane transport;GO:0030001//metal ion transport;GO:0034220//ion transmembrane transport;GO:0030001//metal ion transport;GO:0034220//ion transmembrane transport	K03549|1|0.0|1489|dosa:Os04t0401700-01|KUP system potassium uptake protein	cDNA|potassium transporter, putative, expressed
LOC_Os12g35330	4.065	0.63	-2.68983	1	GO:0031410//cytoplasmic vesicle	-	-	K03676|1|8e-54|211|dosa:Os12t0538600-00|glutaredoxin 3	cDNA|OsGrx_C12 - glutaredoxin subgroup III, expressed
LOC_Os04g05010	16.775	2.57	-2.70647	1	GO:0043231//intracellular membrane-bounded organelle	-	-	-	cDNA|CBS domain containing membrane protein, putative, expressed
LOC_Os11g04850	6.395	0.975	-2.71347	1	GO:0031410//cytoplasmic vesicle	GO:0004672//protein kinase activity;GO:0032559//adenyl ribonucleotide binding	GO:0006464//cellular protein modification process	-	cDNA|DTW domain containing protein, putative, expressed
LOC_Os01g56420	24.59	3.69	-2.73638	1	-	-	-	K14686|1|3e-42|173|dosa:Os01t0770700-00|solute carrier family 31 (copper transporter), member 1	cDNA|ctr copper transporter family protein, putative, expressed
LOC_Os05g40700	1.575	0.235	-2.74462	1	GO:0031224//intrinsic component of membrane	-	-	-	cDNA|transmembrane protein 56, putative, expressed
LOC_Os12g24320	2.47	0.365	-2.75854	1	GO:0031410//cytoplasmic vesicle;GO:0031410//cytoplasmic vesicle	GO:0016462//pyrophosphatase activity;GO:0032559//adenyl ribonucleotide binding;GO:0016462//pyrophosphatase activity;GO:0032559//adenyl ribonucleotide binding	GO:0009987//cellular process;GO:0009987//cellular process	K08900|1|0.0|660|sbi:SORBI_08g023150|mitochondrial chaperone BCS1	cDNA|ATPase 3, putative, expressed
LOC_Os12g33150	1007.66	146.57	-2.78135	1	GO:0043231//intracellular membrane-bounded organelle	-	-	-	cDNA|expressed protein
LOC_Os06g38890	1.14	0.165	-2.7885	0.989769	GO:0043231//intracellular membrane-bounded organelle;GO:0043231//intracellular membrane-bounded organelle	-	-	K12471|1|2e-13|76.6|ats:F775_22445|epsin	cDNA|transposon protein, putative, unclassified, expressed
LOC_Os07g14740	5.285	0.76	-2.79783	1	-	-	-	-	cDNA|harpin-induced protein 1 domain containing protein, expressed
LOC_Os09g29520	2.47	0.355	-2.79862	0.999891	-	GO:0005488//binding;GO:0016301//kinase activity;GO:0004672//protein kinase activity;GO:0000166//nucleotide binding	-	K04733|1|0.0|684|dosa:Os09t0471400-01|interleukin-1 receptor-associated kinase 4 [EC:2.7.11.1];K04730|4|1e-143|511|egu:105036457|interleukin-1 receptor-associated kinase 1 [EC:2.7.11.1]	cDNA|OsWAK81 - OsWAK receptor-like cytoplasmic kinase OsWAK-RLCK, expressed
LOC_Os01g49320	6.75	0.965	-2.80629	1	GO:0031410//cytoplasmic vesicle	GO:0016798//hydrolase activity, acting on glycosyl bonds	GO:0005975//carbohydrate metabolic process	K01183|1|2e-159|563|dosa:Os01t0687400-01|chitinase [EC:3.2.1.14]	cDNA|glycosyl hydrolase, putative, expressed
LOC_Os10g28080	2.015	0.285	-2.82175	0.999378	-	GO:0016798//hydrolase activity, acting on glycosyl bonds;GO:0043167//ion binding	GO:0044238//primary metabolic process	-	cDNA|glycosyl hydrolase, putative, expressed
LOC_Os07g48020	2.605	0.365	-2.83532	1	GO:0031410//cytoplasmic vesicle	-	-	K00430|1|1e-150|534|dosa:Os07t0677200-01|peroxidase [EC:1.11.1.7]	cDNA|peroxidase precursor, putative, expressed
LOC_Os04g01320	2.15	0.3	-2.8413	1	GO:0031410//cytoplasmic vesicle;GO:0031410//cytoplasmic vesicle	-	-	K04733|1|2e-171|603|bdi:104581490|interleukin-1 receptor-associated kinase 4 [EC:2.7.11.1]	cDNA|serine/threonine-protein kinase receptor precursor, putative, expressed
LOC_Os01g25460	1.47	0.2	-2.87774	0.998712	GO:0031410//cytoplasmic vesicle	-	-	K02984|1|8e-83|309|pper:PRUPE_ppa024854mg|small subunit ribosomal protein S3Ae;K20718|2|4e-33|144|ats:F775_16024|LRR receptor-like serine/threonine-protein kinase ERECTA [EC:2.7.11.1];K13420|5|5e-31|137|dosa:Os04t0618700-01|LRR receptor-like serine/threonine-protein kinase FLS2 [EC:2.7.11.1]	cDNA|uncharacterized protein At4g06744 precursor, putative, expressed
LOC_Os09g19229	5.06	0.685	-2.88496	1	GO:0031410//cytoplasmic vesicle	-	-	K04733|1|0.0|637|zma:103632620|interleukin-1 receptor-associated kinase 4 [EC:2.7.11.1]	cDNA|protein kinase domain containing protein, expressed
LOC_Os03g04060	10.445	1.385	-2.91485	1	-	GO:0004553//hydrolase activity, hydrolyzing O-glycosyl compounds	GO:0006026	K20547|1|5e-140|498|dosa:Os03t0132900-01|basic endochitinase B [EC:3.2.1.14]	cDNA|CHIT16 - Chitinase family protein precursor, expressed
LOC_Os10g38780	18.11	2.39	-2.9217	1	-	-	-	K00799|1|1e-92|341|obr:102711186|glutathione S-transferase [EC:2.5.1.18]	cDNA|glutathione S-transferase, putative, expressed
LOC_Os01g71340	9.245	1.22	-2.92179	1	GO:0031410//cytoplasmic vesicle	GO:0016798//hydrolase activity, acting on glycosyl bonds;GO:0043167//ion binding	GO:0044238//primary metabolic process	K19893|1|7e-46|186|sind:105164963|glucan endo-1,3-beta-glucosidase 5/6 [EC:3.2.1.39];K19891|4|6e-44|179|ppp:PHYPADRAFT_61200|glucan endo-1,3-beta-glucosidase 1/2/3 [EC:3.2.1.39]	cDNA|glycosyl hydrolases family 17, putative, expressed
LOC_Os05g30730	2.135	0.28	-2.93074	1	-	-	-	-	cDNA|expressed protein
LOC_Os09g32100	5.015	0.655	-2.93668	0.999282	GO:0044464	-	-	-	cDNA|expressed protein
LOC_Os03g46440	14.13	1.76	-3.00511	1	GO:0043231//intracellular membrane-bounded organelle;GO:0043231//intracellular membrane-bounded organelle	-	-	K14508|1|0.0|1003|dosa:Os03t0667100-01|regulatory protein NPR1	cDNA|BTBA4 - Bric-a-Brac,Tramtrack, Broad Complex BTB domain with Ankyrin repeat region, expressed
LOC_Os10g10130	9	1.065	-3.07907	1	GO:0043231//intracellular membrane-bounded organelle;GO:0031410//cytoplasmic vesicle;GO:0043231//intracellular membrane-bounded organelle;GO:0031410//cytoplasmic vesicle	-	-	K04733|1|0.0|893|bdi:100841907|interleukin-1 receptor-associated kinase 4 [EC:2.7.11.1]	cDNA|OsWAK112d - OsWAK receptor-like protein kinase, expressed
LOC_Os11g07980	8.17	0.945	-3.11195	1	GO:0044464	-	-	K15502|1|4e-31|136|ats:F775_14507|serine/threonine-protein phosphatase 6 regulatory ankyrin repeat subunit A;K19044|3|5e-07|56.2|zma:107275242|E3 ubiquitin-protein ligase XBAT32/33 [EC:2.3.2.27]	cDNA|ion channel nompc, putative, expressed
LOC_Os01g69010	2.13	0.245	-3.12	1	GO:0044464	-	-	K20456|1|7e-74|280|smo:SELMODRAFT_417928|oxysterol-binding protein 1	cDNA|MATE efflux protein, putative, expressed
LOC_Os03g03724	38.395	4.315	-3.15349	1	-	-	-	-	cDNA|expressed protein
LOC_Os02g58139	2.165	0.24	-3.17326	0.999373	GO:0031410//cytoplasmic vesicle;GO:0031410//cytoplasmic vesicle;GO:0031410//cytoplasmic vesicle;GO:0031410//cytoplasmic vesicle;GO:0031410//cytoplasmic vesicle	GO:0016787//hydrolase activity;GO:0016787//hydrolase activity;GO:0016787//hydrolase activity;GO:0016787//hydrolase activity	GO:0006508//proteolysis	K13280|1|3e-77|288|dosa:Os02t0827900-01|signal peptidase, endoplasmic reticulum-type [EC:3.4.-.-]	cDNA|OsSigP1 - Putative Type I Signal Peptidase homologue; employs a putative Ser/His catalytic dyad, expressed
LOC_Os01g05150	2.085	0.23	-3.18034	0.999507	GO:0044464	-	-	-	cDNA|expressed protein
LOC_Os10g05490	2.36	0.26	-3.1822	1	-	-	GO:0006091//generation of precursor metabolites and energy	K20556|1|3e-85|317|thj:104817260|cytochrome P450 family 76 subfamily C	cDNA|cytochrome P450, putative, expressed
LOC_Os05g46020	2.135	0.22	-3.27866	1	GO:0043231//intracellular membrane-bounded organelle	GO:0003677//DNA binding;GO:0001071//nucleic acid binding transcription factor activity	GO:0010467//gene expression	K13424|1|3e-22|107|mus:103994080|WRKY transcription factor 33;K18834|5|3e-22|107|bvg:104883304|WRKY transcription factor 1	cDNA|WRKY7, expressed
LOC_Os04g52190	2.925	0.3	-3.2854	1	GO:0031410//cytoplasmic vesicle;GO:0031410//cytoplasmic vesicle;GO:0031410//cytoplasmic vesicle	GO:0046872//metal ion binding;GO:0046872//metal ion binding;GO:0046872//metal ion binding	-	K04733|1|2e-06|56.2|ats:F775_13336|interleukin-1 receptor-associated kinase 4 [EC:2.7.11.1]	cDNA|vacuolar-sorting receptor precursor, putative, expressed
LOC_Os01g06310	1.275	0.13	-3.29391	0.999963	-	-	-	-	cDNA|glycine-rich cell wall structural protein precursor, putative, expressed
LOC_Os01g03940	36.08	3.515	-3.3596	1	-	-	-	-	cDNA|expressed protein
LOC_Os10g34840	1.155	0.11	-3.39232	1	-	-	-	K04733|1|2e-13|77.0|pmum:103330691|interleukin-1 receptor-associated kinase 4 [EC:2.7.11.1]	cDNA|RIPER6 - Ripening-related family protein precursor, expressed
LOC_Os04g59020	1.525	0.145	-3.39468	0.99993	GO:0044464	-	-	K00430|1|1e-25|117|adu:107468403|peroxidase [EC:1.11.1.7]	cDNA|integral membrane protein, putative, expressed
LOC_Os11g15340	1.25	0.115	-3.44222	0.999203	-	-	-	K08241|1|4e-36|153|egu:105049999|jasmonate O-methyltransferase [EC:2.1.1.141]	cDNA|SAM dependent carboxyl methyltransferase family protein, putative, expressed
LOC_Os07g41410	46.955	4.005	-3.5514	1	-	-	-	-	cDNA|EGG APPARATUS-1, putative, expressed
LOC_Os09g29540	1.065	0.09	-3.56478	0.999357	GO:0031410//cytoplasmic vesicle	GO:0004672//protein kinase activity;GO:0000166//nucleotide binding	-	K04733|1|0.0|689|pda:103708460|interleukin-1 receptor-associated kinase 4 [EC:2.7.11.1];K04730|5|2e-147|524|sbi:SORBI_08g018520|interleukin-1 receptor-associated kinase 1 [EC:2.7.11.1]	cDNA|OsWAK82 - OsWAK receptor-like cytoplasmic kinase OsWAK-RLCK, expressed
LOC_Os11g10850	9.225	0.755	-3.611	1	GO:0031410//cytoplasmic vesicle	-	-	K01870|1|6e-10|66.2|eus:EUTSA_v10003524mg|isoleucyl-tRNA synthetase [EC:6.1.1.5]	cDNA|dirigent, putative, expressed
LOC_Os01g74160	7.395	0.585	-3.66004	1	GO:0031410//cytoplasmic vesicle;GO:0031410//cytoplasmic vesicle;GO:0031410//cytoplasmic vesicle	-	-	K05609|1|1e-12|75.5|thj:104813337|ubiquitin carboxyl-terminal hydrolase L3 [EC:3.4.19.12]	cDNA|carboxyl-terminal peptidase, putative, expressed
LOC_Os01g74410	8.975	0.7	-3.68049	1	-	-	-	K09422|1|2e-113|410|osa:4324302|myb proto-oncogene protein, plant	cDNA|MYB family transcription factor, putative, expressed
LOC_Os07g05360	42.485	3.2	-3.73081	1	GO:0009523//photosystem II;GO:0009534//chloroplast thylakoid	-	GO:0044237//cellular metabolic process	K03541|1|6e-61|235|dosa:Os07t0147500-01|photosystem II 10kDa protein	cDNA|photosystem II 10 kDa polypeptide, chloroplast precursor, putative, expressed
LOC_Os01g42790	1.285	0.095	-3.7577	0.995369	GO:0031410//cytoplasmic vesicle	GO:0004175//endopeptidase activity	GO:0019538//protein metabolic process	K01365|1|1e-60|232|obr:102709319|cathepsin L [EC:3.4.22.15];K13441|5|1e-17|89.7|sly:101251145|cysteine protease	cDNA|xylem cysteine proteinase 2 precursor, putative, expressed
LOC_Os08g35490	5.455	0.4	-3.76951	1	-	-	-	K14686|1|2e-16|87.0|dosa:Os08t0455900-00|solute carrier family 31 (copper transporter), member 1	cDNA|ctr copper transporter family protein, putative, expressed
LOC_Os01g73250	824.405	60.005	-3.7802	1	-	-	-	-	cDNA|abscisic stress-ripening, putative, expressed
LOC_Os08g26230	4.7	0.34	-3.78905	0.999988	GO:0043231//intracellular membrane-bounded organelle;GO:0043231//intracellular membrane-bounded organelle;GO:0043231//intracellular membrane-bounded organelle	-	-	-	cDNA|expressed protein
LOC_Os09g34230	1.11	0.08	-3.79442	0.999626	-	GO:0016740//transferase activity	-	K13691|1|0.0|887|osa:4347592|pathogen-inducible salicylic acid glucosyltransferase [EC:2.4.1.-]	cDNA|UDP-glucoronosyl/UDP-glucosyl transferase, putative, expressed
LOC_Os08g30510	7.085	0.51	-3.7962	1	-	-	-	-	cDNA|expressed protein
LOC_Os03g46200	1.19	0.085	-3.80735	0.996428	-	-	-	-	cDNA|acetyltransferase, GNAT family, putative, expressed
LOC_Os04g39320	3.74	0.23	-4.02333	1	-	-	-	K19307|1|6e-08|59.7|bna:106394303|25S rRNA (uracil2634-N3)-methyltransferase [EC:2.1.1.313]	cDNA|expressed protein
LOC_Os01g51570	2.85	0.175	-4.02554	0.999997	GO:0031410//cytoplasmic vesicle	GO:0004553//hydrolase activity, hydrolyzing O-glycosyl compounds	GO:0044238//primary metabolic process	K19891|1|3e-51|203|crb:CARUB_v10019481mg|glucan endo-1,3-beta-glucosidase 1/2/3 [EC:3.2.1.39]	cDNA|glycosyl hydrolases family 17, putative, expressed
LOC_Os12g36910	2.115	0.12	-4.13955	1	-	-	-	K04733|1|6e-12|74.3|sita:101784675|interleukin-1 receptor-associated kinase 4 [EC:2.7.11.1]	cDNA|calmodulin binding protein, putative, expressed
LOC_Os04g28480	2.21	0.125	-4.14405	0.998064	-	-	-	K15255|1|3e-39|163|brp:103844696|ATP-dependent DNA helicase PIF1 [EC:3.6.4.12];K07466|2|9e-38|159|sbi:SORBI_10g016776|replication factor A1	cDNA|retrotransposon protein, putative, unclassified, expressed
LOC_Os12g40390	1.075	0.06	-4.16323	0.996887	-	-	-	K03094|1|3e-42|172|obr:102702906|S-phase kinase-associated protein 1	cDNA|expressed protein
LOC_Os03g18130	5.97	0.33	-4.17719	1	-	GO:0016884//carbon-nitrogen ligase activity, with glutamine as amido-N-donor;GO:0032559//adenyl ribonucleotide binding	GO:0009064//glutamine family amino acid metabolic process;GO:0006528//asparagine metabolic process	K01953|1|0.0|1101|dosa:Os03t0291500-01|asparagine synthase (glutamine-hydrolysing) [EC:6.3.5.4]	cDNA|asparagine synthetase, putative, expressed
LOC_Os04g47360	10.065	0.54	-4.22024	1	GO:0044464	GO:0004175//endopeptidase activity	GO:0019538//protein metabolic process	K01322|1|0.0|1497|dosa:Os04t0561500-01|prolyl oligopeptidase [EC:3.4.21.26]	cDNA|OsPOP9 - Putative Prolyl Oligopeptidase homologue, expressed
LOC_Os08g39840	2.265	0.12	-4.2384	1	GO:0043231//intracellular membrane-bounded organelle	GO:0046914//transition metal ion binding;GO:0016702//oxidoreductase activity, acting on single donors with incorporation of molecular oxygen, incorporation of two atoms of oxygen;GO:0016627//oxidoreductase activity, acting on the CH-CH group of donors	GO:0006633//fatty acid biosynthetic process;GO:0009607//response to biotic stimulus;GO:0006950//response to stress;GO:0006091//generation of precursor metabolites and energy	K00454|1|0.0|1609|dosa:Os08t0508800-01|lipoxygenase [EC:1.13.11.12]	cDNA|lipoxygenase, chloroplast precursor, putative, expressed OsLOX9
LOC_Os12g16680	1.155	0.06	-4.26679	1	-	-	-	-	cDNA|expressed protein
LOC_Os08g10310	2.675	0.135	-4.30851	1	GO:0031410//cytoplasmic vesicle;GO:0031410//cytoplasmic vesicle	-	-	K04733|1|2e-101|371|dosa:Os05t0256500-00|interleukin-1 receptor-associated kinase 4 [EC:2.7.11.1]	cDNA|SHR5-receptor-like kinase, putative, expressed
LOC_Os01g47070	6.77	0.33	-4.35862	1	GO:0031410//cytoplasmic vesicle	GO:0016798//hydrolase activity, acting on glycosyl bonds	GO:0008152//metabolic process	K01183|1|1e-155|550|dosa:Os01t0660200-01|chitinase [EC:3.2.1.14]	cDNA|glycosyl hydrolase, putative, expressed
LOC_Os07g48980	38.01	1.75	-4.44095	1	-	GO:0016740//transferase activity	GO:0000041//transition metal ion transport	K05953|1|1e-150|534|dosa:Os07t0689600-01|nicotianamine synthase [EC:2.5.1.43]	cDNA|nicotianamine synthase, putative, expressed
LOC_Os12g43380	12.865	0.49	-4.71453	1	GO:0031410//cytoplasmic vesicle	-	-	K04733|1|4e-51|202|sbi:SORBI_03g025670|interleukin-1 receptor-associated kinase 4 [EC:2.7.11.1]	cDNA|thaumatin, putative, expressed
LOC_Os04g30250	2.575	0.09	-4.8385	0.999182	GO:0031410//cytoplasmic vesicle;GO:0031410//cytoplasmic vesicle;GO:0031410//cytoplasmic vesicle	-	-	K04733|1|2e-32|134|pda:103708460|interleukin-1 receptor-associated kinase 4 [EC:2.7.11.1]	cDNA|wall-associated receptor kinase-like 5 precursor, putative, expressed
LOC_Os11g45190	1.4	0.045	-4.95936	0.999952	-	-	-	K19613|1|6e-103|377|egu:105055277|leucine-rich repeat protein SHOC2;K15078|2|4e-90|334|tcc:TCM_005809|structure-specific endonuclease subunit SLX1 [EC:3.6.1.-]	cDNA|NB-ARC domain containing protein, expressed
LOC_Os10g14920	2.975	0.085	-5.12928	0.99927	GO:0044464;GO:0044464	-	-	-	cDNA|integral membrane protein DUF6 containing protein, expressed
LOC_Os01g01840	16.755	0.46	-5.18681	1	-	-	-	-	cDNA|helix-loop-helix DNA-binding domain containing protein, expressed
LOC_Os01g04800	2.265	0.06	-5.2384	1	GO:0043231//intracellular membrane-bounded organelle	GO:0003676//nucleic acid binding;GO:0001071//nucleic acid binding transcription factor activity	GO:0006351//transcription, DNA-templated	K09287|1|1e-95|351|sita:101759210|RAV-like factor	cDNA|B3 DNA binding domain containing protein, expressed
LOC_Os09g17730	22.865	0.485	-5.55901	1	-	-	-	K20478|1|1e-07|60.1|egu:105053374|golgin subfamily B member 1;K10352|4|7e-07|57.4|lja:Lj6g3v1629470.1|myosin heavy chain;K20283|5|1e-06|56.6|pvu:PHAVU_011G024500g|golgin subfamily A member 4	cDNA|proton pump interactor, putative, expressed
LOC_Os07g35560	3.48	0.07	-5.63559	1	GO:0031410//cytoplasmic vesicle;GO:0031410//cytoplasmic vesicle	-	-	K19891|1|5e-79|296|smo:SELMODRAFT_442025|glucan endo-1,3-beta-glucosidase 1/2/3 [EC:3.2.1.39]	cDNA|glucan endo-1,3-beta-glucosidase precursor, putative, expressed
LOC_Os01g36294	1.77	0.035	-5.66025	0.999905	GO:0031410//cytoplasmic vesicle	GO:0016491//oxidoreductase activity;GO:0005506//iron ion binding	-	K00512|1|1e-139|498|sbi:SORBI_07g000530|steroid 17alpha-monooxygenase / 17alpha-hydroxyprogesterone deacetylase [EC:1.14.14.19 1.14.14.32]	cDNA|cytochrome P450, putative, expressed
LOC_Os05g30500	3.05	0.055	-5.79323	0.999998	-	-	-	-	cDNA|expressed protein
LOC_Os04g30240	5.785	0.07	-6.36882	1	GO:0031410//cytoplasmic vesicle	-	-	K04733|1|4e-157|556|pda:103708460|interleukin-1 receptor-associated kinase 4 [EC:2.7.11.1]	cDNA|OsWAK60 - OsWAK receptor-like protein kinase, expressed
LOC_Os12g40279	5.685	0.06	-6.56605	1	GO:0043231//intracellular membrane-bounded organelle	-	-	K19525|1|0.0|862|lja:Lj4g3v0867490.3|vacuolar protein sorting-associated protein 13A/C;K09489|2|2e-59|234|zma:103638334|heat shock 70kDa protein 4	cDNA|protein kinase domain containing protein, expressed
ChrSy.fgenesh.gene.28	1.16	0.01	-6.85798	1	-	-	-	K04077|1|0.0|1062|dosa:Os04t0443900-01|chaperonin GroEL	cDNA|expressed protein
LOC_Os07g06790	1.185	0.01	-6.88874	1	GO:0043231//intracellular membrane-bounded organelle	-	-	K20725|1|5e-23|107|dosa:Os07t0161700-00|MAP kinase substrate 1	cDNA|VQ domain containing protein, putative, expressed
LOC_Os07g30120	1.21	0.01	-6.91886	1	-	-	-	-	cDNA|expressed protein
LOC_Os12g33130	153.04	1.255	-6.93008	1	GO:0043231//intracellular membrane-bounded organelle	-	-	-	cDNA|expressed protein
LOC_Os02g52300	1.265	0.01	-6.98299	1	-	-	-	-	cDNA|CPuORF38 - conserved peptide uORF-containing transcript, expressed
LOC_Os11g41365	1.265	0.01	-6.98299	1	-	-	-	-	cDNA|expressed protein
LOC_Os09g25060	1.625	0.01	-7.3443	1	-	GO:0003677//DNA binding	-	K13424|1|2e-20|101|gmx:100127421|WRKY transcription factor 33;K18834|3|9e-20|99.4|gra:105799814|WRKY transcription factor 1	cDNA|WRKY76, expressed
LOC_Os11g06980	91.905	0.535	-7.42446	1	GO:0031410//cytoplasmic vesicle	-	-	K12472|1|1e-22|109|bvg:104885038|epidermal growth factor receptor substrate 15;K06699|2|4e-17|91.3|smo:SELMODRAFT_440226|proteasome activator subunit 4	cDNA|BURP domain containing protein, expressed
LOC_Os05g25770	13.045	0.06	-7.76432	1	-	-	-	K13459|1|3e-16|87.8|adu:107468800|disease resistance protein RPS2;K16225|2|5e-13|77.0|crb:CARUB_v10025742mg|probable WRKY transcription factor 52;K13425|3|9e-12|72.8|adu:107488158|WRKY transcription factor 22;K18835|5|7e-10|66.6|bdi:100825419|WRKY transcription factor 2	cDNA|WRKY45, expressed
LOC_Os05g01140	2.5	0.01	-7.96578	1	-	-	-	K08241|1|2e-77|291|sita:101762682|jasmonate O-methyltransferase [EC:2.1.1.141]	cDNA|methyltransferase, putative, expressed
LOC_Os01g28450	2.625	0.01	-8.03617	1	GO:0031410//cytoplasmic vesicle	-	GO:0006950//response to stress	K13449|1|2e-85|315|dosa:Os01t0382000-01|pathogenesis-related protein 1	cDNA|SCP-like extracellular protein, expressed OsPR1b
LOC_Os07g25002	4.435	0.01	-8.79279	1	GO:0000314//organellar small ribosomal subunit;GO:0009536//plastid	GO:0003723//RNA binding;GO:0005198//structural molecule activity	GO:0010467//gene expression	K02992|1|6e-94|210|mtr:MTR_3g035660|small subunit ribosomal protein S7	cDNA|chloroplast 30S ribosomal protein S7, putative, expressed
LOC_Os05g32460	9.935	0.01	-9.95638	1	-	-	-	-	cDNA|VQ domain containing protein, putative, expressed
LOC_Os03g01190	10.795	0.01	-10.0761	1	-	-	-	K00344|1|0.0|708|osa:4331289|NADPH2:quinone reductase [EC:1.6.5.5]	cDNA|dehydrogenase, putative, expressed
LOC_Os04g01330	234.365	0.095	-11.2685	1	-	-	-	-	cDNA|expressed protein

## Sheet: Table S2
Table S2. The DEGs in OsF3H04g gene editing line CR-04g-12.
Gene ID	ZH11 FPKM	CR-04g FPKM	log2(CR-04g/ZH11)	P value	GO	Kegg Orthology
LOC_Os03g02470	0.04	42.81	8.49854	2.59974e-91
LOC_Os01g38650	0.013	21.903	7.71289	5.48054e-59
LOC_Os03g18779	0	16.153	7.47387	7.98897e-49
LOC_Os01g36064	0	6.406	7.42349	9.03338e-50	GO:0005515//protein binding;GO:0046983//protein dimerization activity;GO:0005488//binding;	K02925//large subunit ribosomal protein L3e+ko03010//Ribosome;K12524//bifunctional aspartokinase / homoserine dehydrogenase 1 [EC:2.7.2.4 1.1.1.3]+ko00300//Lysine biosynthesis+ko01230//Biosynthesis of amino acids+ko01100//Metabolic pathways+ko01110//Biosynthesis of secondary metabolites+ko00261//Monobactam biosynthesis+ko00260//Glycine, serine and threonine metabolism+ko00270//Cysteine and methio…
LOC_Os12g24050	0.03	6.976	7.15279	2.07229e-84	GO:0034641//cellular nitrogen compound metabolic process;GO:0008152//metabolic process;GO:0044237//cellular metabolic process;GO:0006807//nitrogen compound metabolic process;GO:0015074//DNA integration;GO:0090304//nucleic acid metabolic process;GO:0006259//DNA metabolic process;GO:0009987//cellular process;GO:0006139//nucleobase-containing compound metabolic process;GO:0006725//cellular aromatic …	K12349//neutral ceramidase [EC:3.5.1.23]+ko00600//Sphingolipid metabolism+ko01100//Metabolic pathways;K19525//vacuolar protein sorting-associated protein 13A/C;K02469//DNA gyrase subunit A [EC:5.99.1.3]
LOC_Os04g34490	0.033	9.023	6.61138	4.58523e-48	GO:0071944//cell periphery;GO:0016020//membrane;GO:0031224//intrinsic component of membrane;GO:0016021//integral component of membrane;GO:0005886//plasma membrane;GO:0022857//transmembrane transporter activity;GO:0005215//transporter activity;	K17500//integrin-linked kinase-associated serine/threonine phosphatase 2C [EC:3.1.3.16]
LOC_Os06g11830	0.013	3.906	6.3953	1.50899e-40	GO:0046983//protein dimerization activity;GO:0005515//protein binding;GO:0005488//binding;	K02925//large subunit ribosomal protein L3e+ko03010//Ribosome;K12524//bifunctional aspartokinase / homoserine dehydrogenase 1 [EC:2.7.2.4 1.1.1.3]+ko00300//Lysine biosynthesis+ko01230//Biosynthesis of amino acids+ko01100//Metabolic pathways+ko01110//Biosynthesis of secondary metabolites+ko00261//Monobactam biosynthesis+ko00260//Glycine, serine and threonine metabolism+ko00270//Cysteine and methio…
LOC_Os08g07080	0.06	8.103	6.30861	4.38826e-56	GO:0010333//terpene synthase activity;GO:0000287//magnesium ion binding;GO:0046872//metal ion binding;GO:0005488//binding;GO:0043169//cation binding;GO:0043167//ion binding;GO:0016838//carbon-oxygen lyase activity, acting on phosphates;GO:0016829//lyase activity;GO:0003824//catalytic activity;GO:0016835//carbon-oxygen lyase activity;	K22061//beta-sesquiphellandrene synthase [EC:4.2.3.123]
LOC_Os03g36100	0.09	11.506	6.07567	6.3647e-39
LOC_Os04g34500	0.013	4.446	5.94052	7.25502e-31	GO:0046483//heterocycle metabolic process;GO:0006139//nucleobase-containing compound metabolic process;GO:1901360//organic cyclic compound metabolic process;GO:0044260//cellular macromolecule metabolic process;GO:0006807//nitrogen compound metabolic process;GO:0044238//primary metabolic process;GO:0071704//organic substance metabolic process;GO:0006725//cellular aromatic compound metabolic proces…	K20826//RNA polymerase II-associated protein 1;K09571//FK506-binding protein 4/5 [EC:5.2.1.8];K11593//eukaryotic translation initiation factor 2C;K11982//E3 ubiquitin-protein ligase RNF115/126 [EC:2.3.2.27];K15176//RNA polymerase-associated protein CTR9
LOC_Os08g13580	0.16	10.41	5.84918	1.25124e-90	GO:0043169//cation binding;GO:0005488//binding;GO:0008270//zinc ion binding;GO:0003676//nucleic acid binding;GO:0046872//metal ion binding;GO:1901363//heterocyclic compound binding;GO:0097159//organic cyclic compound binding;GO:0046914//transition metal ion binding;GO:0043167//ion binding;	K17604//zinc finger SWIM domain-containing protein 3
LOC_Os12g14440	0.253	17.21	5.72425	7.20436e-61	GO:0048046//apoplast;GO:0005576//extracellular region;GO:0005488//binding;GO:0030246//carbohydrate binding;	K04733//interleukin-1 receptor-associated kinase 4 [EC:2.7.11.1]
LOC_Os01g42520	0.283	14.973	5.62589	2.32534e-95		K13172//serine/arginine repetitive matrix protein 2;K22020//mucin-19
LOC_Os12g29690	0	1.26	5.60975	1.69331e-22	GO:0097367//carbohydrate derivative binding;GO:0032553//ribonucleotide binding;GO:0043168//anion binding;GO:0043531//ADP binding;GO:0017076//purine nucleotide binding;GO:0032559//adenyl ribonucleotide binding;GO:1901265//nucleoside phosphate binding;GO:0005488//binding;GO:1901363//heterocyclic compound binding;GO:0097159//organic cyclic compound binding;GO:0032555//purine ribonucleotide binding;G…	K15078//structure-specific endonuclease subunit SLX1 [EC:3.6.1.-]
LOC_Os03g43100	0.02	5.506	5.58255	3.64108e-24	GO:0016020//membrane;GO:0016021//integral component of membrane;GO:0031224//intrinsic component of membrane;
LOC_Os12g02210	0.18	13.496	5.51162	2.21029e-39	GO:0009987//cellular process;GO:0043170//macromolecule metabolic process;GO:0008152//metabolic process;GO:0044237//cellular metabolic process;GO:0019941//modification-dependent protein catabolic process;GO:1901575//organic substance catabolic process;GO:1901564//organonitrogen compound metabolic process;GO:0009056//catabolic process;GO:0044260//cellular macromolecule metabolic process;GO:0044267/…	K16286//E3 ubiquitin-protein ligase EL5 [EC:2.3.2.27];K19038//E3 ubiquitin-protein ligase ATL41 [EC:2.3.2.27]
LOC_Os04g17660	3.443	154.986	5.51107	3.35709e-181		K22547//arsenate reductase [EC:1.20.4.1];K22547//arsenate reductase [EC:1.20.4.1];K22547//arsenate reductase [EC:1.20.4.1]
LOC_Os07g15340	0	1.52	5.46047	5.92143e-22	GO:0046983//protein dimerization activity;GO:0005515//protein binding;GO:0005488//binding;	K02925//large subunit ribosomal protein L3e+ko03010//Ribosome;K12524//bifunctional aspartokinase / homoserine dehydrogenase 1 [EC:2.7.2.4 1.1.1.3]+ko00300//Lysine biosynthesis+ko01230//Biosynthesis of amino acids+ko01100//Metabolic pathways+ko01110//Biosynthesis of secondary metabolites+ko00261//Monobactam biosynthesis+ko00260//Glycine, serine and threonine metabolism+ko00270//Cysteine and methio…
LOC_Os01g62540	0	4.063	5.45446	2.29746e-22	GO:0016020//membrane;GO:0031224//intrinsic component of membrane;GO:0016021//integral component of membrane;
LOC_Os11g01700	0	1.196	5.35069	2.19252e-20	GO:0043170//macromolecule metabolic process;GO:0008152//metabolic process;GO:0006139//nucleobase-containing compound metabolic process;GO:0009987//cellular process;GO:0044238//primary metabolic process;GO:0034641//cellular nitrogen compound metabolic process;GO:0090304//nucleic acid metabolic process;GO:0006807//nitrogen compound metabolic process;GO:1901360//organic cyclic compound metabolic pro…	K20923//mixed-linked glucan synthase [EC:2.4.1.-];K02350//DNA polymerase zeta [EC:2.7.7.7];K03006//DNA-directed RNA polymerase II subunit RPB1 [EC:2.7.7.6]+ko03020//RNA polymerase
LOC_Os01g61340	0	9.816	5.20823	6.05917e-20
LOC_Os04g51130	0.7	24.746	5.17665	2.12233e-137	GO:0043229//intracellular organelle;GO:0043227//membrane-bounded organelle;GO:0005622//intracellular;GO:0043231//intracellular membrane-bounded organelle;GO:0005634//nucleus;GO:0043226//organelle;GO:0003677//DNA binding;GO:1901363//heterocyclic compound binding;GO:0097159//organic cyclic compound binding;GO:0005488//binding;GO:0003676//nucleic acid binding;	K14491//two-component response regulator ARR-B family+ko04075//Plant hormone signal transduction
LOC_Os05g04500	0.073	4.37	5.09086	1.84899e-29	GO:0042743//hydrogen peroxide metabolic process;GO:0006950//response to stress;GO:0006979//response to oxidative stress;GO:0044237//cellular metabolic process;GO:0072593//reactive oxygen species metabolic process;GO:0009056//catabolic process;GO:0008152//metabolic process;GO:0042744//hydrogen peroxide catabolic process;GO:0009987//cellular process;GO:0016999//antibiotic metabolic process;GO:00171…	K00430//peroxidase [EC:1.11.1.7]+ko01100//Metabolic pathways+ko01110//Biosynthesis of secondary metabolites+ko00940//Phenylpropanoid biosynthesis
LOC_Os06g15430	0.016	2.983	5.02429	6.73204e-20
LOC_Os01g47500	0	3.686	5.018	2.75813e-17		K02184//formin 2
LOC_Os11g01690	0.056	5.906	5.0042	7.75957e-22
LOC_Os01g71810	0.096	4.576	4.97961	3.95753e-29	GO:0044238//primary metabolic process;GO:0008152//metabolic process;GO:0071704//organic substance metabolic process;GO:0005975//carbohydrate metabolic process;GO:0071944//cell periphery;GO:0031224//intrinsic component of membrane;GO:0046658//anchored component of plasma membrane;GO:0031226//intrinsic component of plasma membrane;GO:0016020//membrane;GO:0031225//anchored component of membrane;GO:0…	K19891//glucan endo-1,3-beta-glucosidase 1/2/3 [EC:3.2.1.39]+ko00500//Starch and sucrose metabolism;K19892//glucan endo-1,3-beta-glucosidase 4 [EC:3.2.1.39]+ko00500//Starch and sucrose metabolism
LOC_Os05g23050	0	1.02	4.95732	8.1549e-18	GO:0004519//endonuclease activity;GO:0016893//endonuclease activity, active with either ribo- or deoxyribonucleic acids and producing 5'-phosphomonoesters;GO:0004518//nuclease activity;GO:0043169//cation binding;GO:0004521//endoribonuclease activity;GO:0004540//ribonuclease activity;GO:0003676//nucleic acid binding;GO:0003824//catalytic activity;GO:0140098//catalytic activity, acting on RNA;GO:00…	K08738//cytochrome c;K04733//interleukin-1 receptor-associated kinase 4 [EC:2.7.11.1];K07277//outer membrane protein insertion porin family
LOC_Os05g45170	0	2.49	4.91583	2.05643e-17	GO:0016757//transferase activity, transferring glycosyl groups;GO:0003824//catalytic activity;GO:0016758//transferase activity, transferring hexosyl groups;GO:0016740//transferase activity;	K22845//phlorizin synthase [EC:2.4.1.357]+ko01110//Biosynthesis of secondary metabolites+ko00941//Flavonoid biosynthesis
LOC_Os11g35540	0.183	6.656	4.90903	2.36974e-41
LOC_Os01g06852	0.056	2.606	4.86337	5.52809e-27	GO:0080090//regulation of primary metabolic process;GO:0051171//regulation of nitrogen compound metabolic process;GO:0065007//biological regulation;GO:0019219//regulation of nucleobase-containing compound metabolic process;GO:0050794//regulation of cellular process;GO:0010556//regulation of macromolecule biosynthetic process;GO:0031323//regulation of cellular metabolic process;GO:2001141//regulat…	K17604//zinc finger SWIM domain-containing protein 3
LOC_Os11g15755	0.023	1.55	4.77967	1.38901e-19	GO:0010556//regulation of macromolecule biosynthetic process;GO:0051171//regulation of nitrogen compound metabolic process;GO:0031326//regulation of cellular biosynthetic process;GO:0019219//regulation of nucleobase-containing compound metabolic process;GO:0031323//regulation of cellular metabolic process;GO:1903506//regulation of nucleic acid-templated transcription;GO:0019222//regulation of met…	K17604//zinc finger SWIM domain-containing protein 3
LOC_Os10g32980	0.02	1.216	4.72753	1.2566e-22	GO:0071555//cell wall organization;GO:0051273//beta-glucan metabolic process;GO:0016051//carbohydrate biosynthetic process;GO:0005975//carbohydrate metabolic process;GO:0007049//cell cycle;GO:1901576//organic substance biosynthetic process;GO:0045229//external encapsulating structure organization;GO:0044262//cellular carbohydrate metabolic process;GO:0042546//cell wall biogenesis;GO:0061640//cyto…	K10999//cellulose synthase A [EC:2.4.1.12]
LOC_Os05g48900	0.566	15.62	4.72696	2.87417e-65	GO:0071840//cellular component organization or biogenesis;GO:0009834//plant-type secondary cell wall biogenesis;GO:0044085//cellular component biogenesis;GO:0071554//cell wall organization or biogenesis;GO:0071669//plant-type cell wall organization or biogenesis;GO:0009832//plant-type cell wall biogenesis;GO:0042546//cell wall biogenesis;GO:0009987//cellular process;GO:0071944//cell periphery;GO:…	K21952//CASK-interacting protein
LOC_Os08g38170	0.02	1.596	4.72211	7.04288e-19	GO:0006281//DNA repair;GO:0046483//heterocycle metabolic process;GO:0043170//macromolecule metabolic process;GO:0006259//DNA metabolic process;GO:0051716//cellular response to stimulus;GO:0009987//cellular process;GO:0034641//cellular nitrogen compound metabolic process;GO:0006284//base-excision repair;GO:0006974//cellular response to DNA damage stimulus;GO:0090304//nucleic acid metabolic process…	K01246//DNA-3-methyladenine glycosylase I [EC:3.2.2.20]+ko03410//Base excision repair;K01246//DNA-3-methyladenine glycosylase I [EC:3.2.2.20]+ko03410//Base excision repair;K01246//DNA-3-methyladenine glycosylase I [EC:3.2.2.20]+ko03410//Base excision repair;K01246//DNA-3-methyladenine glycosylase I [EC:3.2.2.20]+ko03410//Base excision repair
LOC_Os12g29680	0	2.996	4.54987	1.63734e-14
LOC_Os07g44780	0.033	2.08	4.5413	6.33822e-18	GO:0071704//organic substance metabolic process;GO:0008152//metabolic process;GO:0044238//primary metabolic process;GO:0006629//lipid metabolic process;GO:0016298//lipase activity;GO:0016788//hydrolase activity, acting on ester bonds;GO:0003824//catalytic activity;GO:0016787//hydrolase activity;	K14306//nuclear pore complex protein Nup62+ko03013//RNA transport
LOC_Os11g35630	0.146	3.493	4.46192	5.27556e-36	GO:0071704//organic substance metabolic process;GO:0006259//DNA metabolic process;GO:1901360//organic cyclic compound metabolic process;GO:0034641//cellular nitrogen compound metabolic process;GO:0006139//nucleobase-containing compound metabolic process;GO:0015074//DNA integration;GO:0006807//nitrogen compound metabolic process;GO:0090304//nucleic acid metabolic process;GO:0008152//metabolic proc…	K12447//UDP-sugar pyrophosphorylase [EC:2.7.7.64]+ko00520//Amino sugar and nucleotide sugar metabolism+ko00040//Pentose and glucuronate interconversions+ko01100//Metabolic pathways+ko00052//Galactose metabolism+ko00053//Ascorbate and aldarate metabolism;K22686//pro-apoptotic serine protease NMA111 [EC:3.4.21.-];K18195//rhamnogalacturonan endolyase [EC:4.2.2.23];K17545//serine/threonine-protein ki…
LOC_Os05g11820	0.113	2.836	4.42631	2.84435e-28	GO:0016020//membrane;GO:0016021//integral component of membrane;GO:0031224//intrinsic component of membrane;	K02218//casein kinase 1 [EC:2.7.11.1];K05291//phosphatidylinositol glycan, class S+ko01100//Metabolic pathways+ko00563//Glycosylphosphatidylinositol (GPI)-anchor biosynthesis;K00430//peroxidase [EC:1.11.1.7]+ko01100//Metabolic pathways+ko01110//Biosynthesis of secondary metabolites+ko00940//Phenylpropanoid biosynthesis;K01247//DNA-3-methyladenine glycosylase II [EC:3.2.2.21]+ko03410//Base excisio…
LOC_Os01g21034	0.073	2.763	4.38757	1.02619e-18	GO:0017144//drug metabolic process;GO:0005975//carbohydrate metabolic process;GO:0071554//cell wall organization or biogenesis;GO:0045488//pectin metabolic process;GO:0008152//metabolic process;GO:0042737//drug catabolic process;GO:0009987//cellular process;GO:1901575//organic substance catabolic process;GO:0043170//macromolecule metabolic process;GO:0044248//cellular catabolic process;GO:0010393…	K01051//pectinesterase [EC:3.1.1.11]+ko00040//Pentose and glucuronate interconversions+ko01100//Metabolic pathways;K01051//pectinesterase [EC:3.1.1.11]+ko00040//Pentose and glucuronate interconversions+ko01100//Metabolic pathways;K01051//pectinesterase [EC:3.1.1.11]+ko00040//Pentose and glucuronate interconversions+ko01100//Metabolic pathways
LOC_Os06g18670	0.82	15.886	4.33641	5.97567e-87	GO:0043226//organelle;GO:0043227//membrane-bounded organelle;GO:0005622//intracellular;GO:0043229//intracellular organelle;GO:0043231//intracellular membrane-bounded organelle;GO:0016740//transferase activity;GO:0080043//quercetin 3-O-glucosyltransferase activity;GO:0035251//UDP-glucosyltransferase activity;GO:0046527//glucosyltransferase activity;GO:0008194//UDP-glycosyltransferase activity;GO:0…	K23154//2-hydroxyflavanone C-glucosyltransferase [EC:2.4.1.360]
LOC_Os02g53970	0	0.586	4.31445	9.76389e-13	GO:0008236//serine-type peptidase activity;GO:0003824//catalytic activity;GO:0008233//peptidase activity;GO:0016787//hydrolase activity;GO:0017171//serine hydrolase activity;GO:0070011//peptidase activity, acting on L-amino acid peptides;GO:0004252//serine-type endopeptidase activity;GO:0140096//catalytic activity, acting on a protein;GO:0004175//endopeptidase activity;	K15333//tRNA guanosine-2'-O-methyltransferase [EC:2.1.1.34];K12619//5'-3' exoribonuclease 2 [EC:3.1.13.-]+ko03018//RNA degradation+ko03008//Ribosome biogenesis in eukaryotes;K13199//plasminogen activator inhibitor 1 RNA-binding protein;K14568//rRNA small subunit pseudouridine methyltransferase Nep1 [EC:2.1.1.260]+ko03008//Ribosome biogenesis in eukaryotes;K13124//mitogen-activated protein kinase …
LOC_Os11g11220	0.01	0.98	4.27948	2.50215e-13	GO:0070727//cellular macromolecule localization;GO:0065007//biological regulation;GO:0015833//peptide transport;GO:0008104//protein localization;GO:0060255//regulation of macromolecule metabolic process;GO:2001141//regulation of RNA biosynthetic process;GO:0031323//regulation of cellular metabolic process;GO:0071702//organic substance transport;GO:0051252//regulation of RNA metabolic process;GO:0…	K17604//zinc finger SWIM domain-containing protein 3
LOC_Os05g18780	0.31	6.586	4.18375	6.55166e-26	GO:1901564//organonitrogen compound metabolic process;GO:0044281//small molecule metabolic process;GO:0016070//RNA metabolic process;GO:0009058//biosynthetic process;GO:0008033//tRNA processing;GO:0017144//drug metabolic process;GO:0006396//RNA processing;GO:0006399//tRNA metabolic process;GO:0034470//ncRNA processing;GO:0010467//gene expression;GO:0042819//vitamin B6 biosynthetic process;GO:0046…	K03537//ribonuclease P/MRP protein subunit POP5 [EC:3.1.26.5]+ko03013//RNA transport+ko03008//Ribosome biogenesis in eukaryotes
LOC_Os03g14030	0.21	4.47	4.18257	1.30039e-35		K04733//interleukin-1 receptor-associated kinase 4 [EC:2.7.11.1];K04733//interleukin-1 receptor-associated kinase 4 [EC:2.7.11.1]
LOC_Os03g55290	0.233	5.873	4.15839	1.06485e-21		K03860//phosphatidylinositol glycan, class Q+ko01100//Metabolic pathways+ko00563//Glycosylphosphatidylinositol (GPI)-anchor biosynthesis;K20887//xyloglucan glycosyltransferase 4 [EC:2.4.1.-]
LOC_Os12g32390	0.26	7.146	4.13456	7.648e-19
LOC_Os04g43090	0.033	3.176	4.08045	4.29994e-12
LOC_Os12g29710	0	0.33	4.0601	6.25278e-11	GO:0043531//ADP binding;GO:0030554//adenyl nucleotide binding;GO:0032553//ribonucleotide binding;GO:0032559//adenyl ribonucleotide binding;GO:0005488//binding;GO:0097159//organic cyclic compound binding;GO:0036094//small molecule binding;GO:0097367//carbohydrate derivative binding;GO:0043168//anion binding;GO:0043167//ion binding;GO:1901363//heterocyclic compound binding;GO:0032555//purine ribonu…	K15078//structure-specific endonuclease subunit SLX1 [EC:3.6.1.-]
LOC_Os11g25040	0.013	1.25	4.0568	4.21616e-12		K13172//serine/arginine repetitive matrix protein 2;K14325//RNA-binding protein with serine-rich domain 1+ko03015//mRNA surveillance pathway+ko03013//RNA transport
LOC_Os01g09650	0	2.67	4.04358	4.81578e-11	GO:0016020//membrane;GO:0016021//integral component of membrane;GO:0031224//intrinsic component of membrane;GO:0043492//ATPase activity, coupled to movement of substances;GO:0035639//purine ribonucleoside triphosphate binding;GO:0005319//lipid transporter activity;GO:0005548//phospholipid transporter activity;GO:0016787//hydrolase activity;GO:0043167//ion binding;GO:0003824//catalytic activity;GO…	K11323//histone arginine demethylase JMJD6 [EC:1.14.11.-]
LOC_Os04g58050	0.4	7.786	4.03813	1.69781e-26
LOC_Os05g37490	0	4.273	4.03035	5.44136e-11
LOC_Os12g02170	0.013	1.216	3.9959	9.34452e-12
LOC_Os11g38010	0.026	1.02	3.97267	2.16487e-13		K21596//calmodulin-binding transcription activator;K10393//kinesin family member 2/24
LOC_Os01g58100	0.01	0.823	3.97226	1.5178e-11	GO:0042440//pigment metabolic process;GO:0008152//metabolic process;GO:0046148//pigment biosynthetic process;GO:0031224//intrinsic component of membrane;GO:0016020//membrane;GO:0016021//integral component of membrane;GO:0043169//cation binding;GO:0003824//catalytic activity;GO:0004097//catechol oxidase activity;GO:0046872//metal ion binding;GO:0097159//organic cyclic compound binding;GO:0016679//…	K00422//polyphenol oxidase [EC:1.10.3.1]+ko00350//Tyrosine metabolism+ko01100//Metabolic pathways+ko00950//Isoquinoline alkaloid biosynthesis+ko01110//Biosynthesis of secondary metabolites
LOC_Os05g13940	4.186	72.97	3.97093	6.16408e-29		K12121//phytochrome B+ko04712//Circadian rhythm - plant;K10955//mucin-2
LOC_Os05g07060	0.09	2.36	3.93758	7.92849e-16	GO:0044238//primary metabolic process;GO:0071840//cellular component organization or biogenesis;GO:0009987//cellular process;GO:0008380//RNA splicing;GO:0071554//cell wall organization or biogenesis;GO:0034641//cellular nitrogen compound metabolic process;GO:0006807//nitrogen compound metabolic process;GO:1901360//organic cyclic compound metabolic process;GO:0000377//RNA splicing, via transesteri…	K13172//serine/arginine repetitive matrix protein 2
LOC_Os07g03040	1.106	20.92	3.93069	1.23234e-104
LOC_Os06g48200	0.986	14.57	3.92725	1.55593e-66	GO:0071555//cell wall organization;GO:0044238//primary metabolic process;GO:0005975//carbohydrate metabolic process;GO:0044264//cellular polysaccharide metabolic process;GO:0044260//cellular macromolecule metabolic process;GO:0009987//cellular process;GO:0071704//organic substance metabolic process;GO:0043170//macromolecule metabolic process;GO:0010410//hemicellulose metabolic process;GO:0010411/…	K08235//xyloglucan:xyloglucosyl transferase [EC:2.4.1.207]
LOC_Os03g02460	0.03	1.11	3.9243	5.19263e-13		K11153//retinol dehydrogenase 12 [EC:1.1.1.300]+ko01100//Metabolic pathways;K11153//retinol dehydrogenase 12 [EC:1.1.1.300]+ko01100//Metabolic pathways
LOC_Os05g50390	0	1.31	3.87634	4.49886e-10
LOC_Os04g49210	0.046	1.19	3.87127	1.99132e-14	GO:0046872//metal ion binding;GO:0016491//oxidoreductase activity;GO:0005488//binding;GO:0043169//cation binding;GO:0043167//ion binding;GO:0003824//catalytic activity;GO:0051213//dioxygenase activity;	K00475//naringenin 3-dioxygenase [EC:1.14.11.9]+ko01100//Metabolic pathways+ko01110//Biosynthesis of secondary metabolites+ko00941//Flavonoid biosynthesis
LOC_Os03g14654	9.043	138.023	3.86831	7.80677e-35		K12875//apoptotic chromatin condensation inducer in the nucleus+ko03040//Spliceosome+ko03015//mRNA surveillance pathway+ko03013//RNA transport
LOC_Os04g33450	0.036	1.553	3.86604	9.42366e-12		K19748//RAB6-interacting golgin;K19748//RAB6-interacting golgin;K19748//RAB6-interacting golgin
LOC_Os05g12210	0	0.793	3.84775	6.15968e-10	GO:0008152//metabolic process;GO:0009058//biosynthetic process;GO:0016740//transferase activity;GO:0016746//transferase activity, transferring acyl groups;GO:0003824//catalytic activity;GO:0016747//transferase activity, transferring acyl groups other than amino-acyl groups;	K17212//bisdemethoxycurcumin synthase [EC:2.3.1.211]+ko01110//Biosynthesis of secondary metabolites+ko00945//Stilbenoid, diarylheptanoid and gingerol biosynthesis
LOC_Os01g09880	0.036	1.596	3.83093	5.51076e-11	GO:0005199//structural constituent of cell wall;GO:0005198//structural molecule activity;	K21952//CASK-interacting protein
LOC_Os01g11620	0.27	4.25	3.8219	9.16152e-28	GO:0016788//hydrolase activity, acting on ester bonds;GO:0016787//hydrolase activity;GO:0003824//catalytic activity;	K17987//next to BRCA1 gene 1 protein;K14306//nuclear pore complex protein Nup62+ko03013//RNA transport;K17987//next to BRCA1 gene 1 protein;K14306//nuclear pore complex protein Nup62+ko03013//RNA transport
LOC_Os03g04760	0.223	3.403	3.82063	1.61755e-25	GO:0031224//intrinsic component of membrane;GO:0016021//integral component of membrane;GO:0016020//membrane;
LOC_Os01g28030	0.716	10.256	3.79825	1.93522e-37	GO:0044248//cellular catabolic process;GO:0017144//drug metabolic process;GO:0016999//antibiotic metabolic process;GO:0072593//reactive oxygen species metabolic process;GO:0017001//antibiotic catabolic process;GO:0050896//response to stimulus;GO:0006979//response to oxidative stress;GO:0009987//cellular process;GO:0042737//drug catabolic process;GO:0044237//cellular metabolic process;GO:0008152//…	K00430//peroxidase [EC:1.11.1.7]+ko01100//Metabolic pathways+ko01110//Biosynthesis of secondary metabolites+ko00940//Phenylpropanoid biosynthesis
LOC_Os02g11700	0	0.626	3.79513	1.31863e-09	GO:0043227//membrane-bounded organelle;GO:0043226//organelle;GO:0005622//intracellular;GO:0043231//intracellular membrane-bounded organelle;GO:0043229//intracellular organelle;GO:0008194//UDP-glycosyltransferase activity;GO:0016740//transferase activity;GO:0046527//glucosyltransferase activity;GO:0080044//quercetin 7-O-glucosyltransferase activity;GO:0016758//transferase activity, transferring he…	K13496//UDP-glucosyl transferase 73C [EC:2.4.1.-]
LOC_Os01g02940	0.183	2.893	3.77792	1.29457e-24	GO:0016021//integral component of membrane;GO:0031224//intrinsic component of membrane;GO:0016020//membrane;GO:0016757//transferase activity, transferring glycosyl groups;GO:0003824//catalytic activity;GO:0016740//transferase activity;	K18207//protein O-mannose beta-1,4-N-acetylglucosaminyltransferase [EC:2.4.1.312]+ko00515//Mannose type O-glycan biosynthesis+ko01100//Metabolic pathways;K18134//EGF domain-specific O-GlcNAc transferase [EC:2.4.1.255]+ko00514//Other types of O-glycan biosynthesis;K18207//protein O-mannose beta-1,4-N-acetylglucosaminyltransferase [EC:2.4.1.312]+ko00515//Mannose type O-glycan biosynthesis+ko01100//…
LOC_Os07g49370	0	0.603	3.77719	1.4318e-09	GO:0010413//glucuronoxylan metabolic process;GO:0005975//carbohydrate metabolic process;GO:0016051//carbohydrate biosynthetic process;GO:0009059//macromolecule biosynthetic process;GO:0044264//cellular polysaccharide metabolic process;GO:0043170//macromolecule metabolic process;GO:0044249//cellular biosynthetic process;GO:0010417//glucuronoxylan biosynthetic process;GO:0070589//cellular component…	K20869//putative beta-1,4-xylosyltransferase IRX9 [EC:2.4.2.-]
LOC_Os08g10612	0	1.246	3.76981	1.76883e-09
LOC_Os12g27254	0.02	0.85	3.76444	9.87618e-11	GO:0016746//transferase activity, transferring acyl groups;GO:0016747//transferase activity, transferring acyl groups other than amino-acyl groups;GO:0003824//catalytic activity;GO:0050734//hydroxycinnamoyltransferase activity;GO:0016740//transferase activity;	K19861//benzyl alcohol O-benzoyltransferase [EC:2.3.1.196 2.3.1.232]
LOC_Os01g19020	2.006	29.146	3.74806	1.07379e-27	GO:0009987//cellular process;GO:0008152//metabolic process;GO:0044248//cellular catabolic process;GO:0016999//antibiotic metabolic process;GO:0072593//reactive oxygen species metabolic process;GO:0042744//hydrogen peroxide catabolic process;GO:0006979//response to oxidative stress;GO:0017144//drug metabolic process;GO:0017001//antibiotic catabolic process;GO:0006950//response to stress;GO:0009056…	K00430//peroxidase [EC:1.11.1.7]+ko01100//Metabolic pathways+ko01110//Biosynthesis of secondary metabolites+ko00940//Phenylpropanoid biosynthesis
LOC_Os06g06250	1.023	12.54	3.67679	1.69076e-63	GO:0003824//catalytic activity;GO:0016787//hydrolase activity;GO:0016788//hydrolase activity, acting on ester bonds;	K17987//next to BRCA1 gene 1 protein;K17987//next to BRCA1 gene 1 protein;K14306//nuclear pore complex protein Nup62+ko03013//RNA transport
LOC_Os03g37140	0.013	0.413	3.66208	5.27384e-11		K22909//zinc finger CCCH domain-containing protein 13;K18412//trinucleotide repeat-containing gene 6 protein
LOC_Os09g38239	0.113	1.78	3.65321	5.70187e-16	GO:0008146//sulfotransferase activity;GO:0016782//transferase activity, transferring sulfur-containing groups;GO:0003824//catalytic activity;GO:0016740//transferase activity;	K22312//hydroxyjasmonate sulfotransferase [EC:2.8.2.39]
LOC_Os02g43640	0.026	1.606	3.6475	3.04469e-09		K14709//solute carrier family 39 (zinc transporter), member 1/2/3;K21952//CASK-interacting protein
LOC_Os11g02540	0.153	2.693	3.63763	2.95292e-15	GO:0043226//organelle;GO:0043229//intracellular organelle;GO:0043231//intracellular membrane-bounded organelle;GO:0005634//nucleus;GO:0005622//intracellular;GO:0043227//membrane-bounded organelle;GO:0097159//organic cyclic compound binding;GO:0003700//DNA-binding transcription factor activity;GO:0005488//binding;GO:0003677//DNA binding;GO:0043565//sequence-specific DNA binding;GO:0003676//nucleic…	K13426//WRKY transcription factor 29+ko04016//MAPK signaling pathway - plant+ko04626//Plant-pathogen interaction;K13425//WRKY transcription factor 22+ko04016//MAPK signaling pathway - plant+ko04626//Plant-pathogen interaction;K13459//disease resistance protein RPS2+ko04626//Plant-pathogen interaction;K16225//probable WRKY transcription factor 52+ko04626//Plant-pathogen interaction
LOC_Os09g07350	0.26	4.046	3.6298	1.06536e-17	GO:0005886//plasma membrane;GO:0046658//anchored component of plasma membrane;GO:0071944//cell periphery;GO:0031226//intrinsic component of plasma membrane;GO:0031225//anchored component of membrane;GO:0016020//membrane;GO:0031224//intrinsic component of membrane;	K14709//solute carrier family 39 (zinc transporter), member 1/2/3
LOC_Os01g08530	0.013	1.096	3.62439	7.46375e-09		K10955//mucin-2
LOC_Os06g38160	0	0.976	3.60465	1.29449e-08	GO:0016021//integral component of membrane;GO:0016020//membrane;GO:0031224//intrinsic component of membrane;GO:0017076//purine nucleotide binding;GO:0008144//drug binding;GO:0016773//phosphotransferase activity, alcohol group as acceptor;GO:0032559//adenyl ribonucleotide binding;GO:1901265//nucleoside phosphate binding;GO:0004672//protein kinase activity;GO:0005524//ATP binding;GO:0000166//nucleo…	K01179//endoglucanase [EC:3.2.1.4]+ko01100//Metabolic pathways+ko00500//Starch and sucrose metabolism;K04733//interleukin-1 receptor-associated kinase 4 [EC:2.7.11.1]
LOC_Os08g29580	1.153	15.49	3.60038	3.89329e-24
LOC_Os07g45060	0.05	1.363	3.59042	1.05441e-10		K20606//mitogen-activated protein kinase kinase kinase ANP1 [EC:2.7.11.25]+ko04016//MAPK signaling pathway - plant
LOC_Os01g33740	0	0.31	3.53049	2.8263e-08	GO:0016020//membrane;GO:0016021//integral component of membrane;GO:0031224//intrinsic component of membrane;	K14563//rRNA 2'-O-methyltransferase fibrillarin [EC:2.1.1.-]+ko03008//Ribosome biogenesis in eukaryotes;K09250//cellular nucleic acid-binding protein
LOC_Os08g35760	0	0.716	3.53011	2.74241e-08	GO:0071944//cell periphery;GO:0005618//cell wall;GO:0030312//external encapsulating structure;GO:0048046//apoplast;GO:0005576//extracellular region;GO:0043169//cation binding;GO:0030145//manganese ion binding;GO:0045735//nutrient reservoir activity;GO:0046914//transition metal ion binding;GO:0046872//metal ion binding;GO:0005488//binding;GO:0043167//ion binding;	K03006//DNA-directed RNA polymerase II subunit RPB1 [EC:2.7.7.6]+ko03020//RNA polymerase;K00430//peroxidase [EC:1.11.1.7]+ko01100//Metabolic pathways+ko01110//Biosynthesis of secondary metabolites+ko00940//Phenylpropanoid biosynthesis
LOC_Os12g35390	0	7.066	3.52027	3.4245e-08
LOC_Os01g47510	0	0.26	3.51983	2.86839e-08	GO:0016021//integral component of membrane;GO:0016020//membrane;GO:0031224//intrinsic component of membrane;GO:0004523//RNA-DNA hybrid ribonuclease activity;GO:1901265//nucleoside phosphate binding;GO:0043167//ion binding;GO:0008144//drug binding;GO:0030554//adenyl nucleotide binding;GO:0016788//hydrolase activity, acting on ester bonds;GO:0016779//nucleotidyltransferase activity;GO:0000166//nucl…	K22804//structural maintenance of chromosomes protein 6;K01188//beta-glucosidase [EC:3.2.1.21]+ko01100//Metabolic pathways+ko00500//Starch and sucrose metabolism+ko01110//Biosynthesis of secondary metabolites+ko00460//Cyanoamino acid metabolism+ko00940//Phenylpropanoid biosynthesis;K18195//rhamnogalacturonan endolyase [EC:4.2.2.23];K22048//mechanosensitive ion channel protein 4/5/6/7/8/9/10;K1902…
LOC_Os07g26150	2.82	33.526	3.51948	6.00136e-29	GO:0097159//organic cyclic compound binding;GO:0005488//binding;GO:0003676//nucleic acid binding;GO:0003677//DNA binding;GO:1901363//heterocyclic compound binding;	K15397//3-ketoacyl-CoA synthase [EC:2.3.1.199]+ko01100//Metabolic pathways+ko01110//Biosynthesis of secondary metabolites+ko00062//Fatty acid elongation
LOC_Os10g19910	0.02	1.09	3.51319	7.34188e-09
LOC_Os05g01330	0.676	8.173	3.50098	7.18624e-22	GO:0016020//membrane;GO:0031224//intrinsic component of membrane;GO:0016021//integral component of membrane;	K14709//solute carrier family 39 (zinc transporter), member 1/2/3
LOC_Os12g05220	0.376	4.71	3.49317	4.92795e-18	GO:0031224//intrinsic component of membrane;GO:0016020//membrane;GO:0016021//integral component of membrane;	K21952//CASK-interacting protein
LOC_Os08g40060	0.02	0.78	3.47865	3.15326e-09	GO:0031224//intrinsic component of membrane;GO:0016021//integral component of membrane;GO:0016020//membrane;	K13172//serine/arginine repetitive matrix protein 2
LOC_Os09g25490	0.103	1.293	3.47615	1.68265e-22	GO:0009059//macromolecule biosynthetic process;GO:0009250//glucan biosynthetic process;GO:0009058//biosynthetic process;GO:0044237//cellular metabolic process;GO:0071555//cell wall organization;GO:0030243//cellulose metabolic process;GO:0044085//cellular component biogenesis;GO:0006073//cellular glucan metabolic process;GO:1903047//mitotic cell cycle process;GO:0009832//plant-type cell wall bioge…	K10999//cellulose synthase A [EC:2.4.1.12]
LOC_Os11g07240	0.026	0.573	3.46457	2.0517e-10	GO:0016020//membrane;GO:0031224//intrinsic component of membrane;GO:0016021//integral component of membrane;GO:1901265//nucleoside phosphate binding;GO:0004672//protein kinase activity;GO:0004674//protein serine/threonine kinase activity;GO:0043168//anion binding;GO:0016301//kinase activity;GO:0032559//adenyl ribonucleotide binding;GO:0036094//small molecule binding;GO:0097367//carbohydrate deriv…	K13428//LRR receptor-like serine/threonine-protein kinase EFR [EC:2.7.11.1]+ko04626//Plant-pathogen interaction;K04730//interleukin-1 receptor-associated kinase 1 [EC:2.7.11.1]
LOC_Os02g12470	0	5.556	3.44914	1.21407e-07
LOC_Os11g18730	0.02	0.486	3.44256	1.37963e-09	GO:0008152//metabolic process;GO:0071704//organic substance metabolic process;GO:0044238//primary metabolic process;GO:0005975//carbohydrate metabolic process;GO:0016787//hydrolase activity;GO:0003824//catalytic activity;GO:0004553//hydrolase activity, hydrolyzing O-glycosyl compounds;GO:0016798//hydrolase activity, acting on glycosyl bonds;	K15920//xylan 1,4-beta-xylosidase [EC:3.2.1.37]+ko00520//Amino sugar and nucleotide sugar metabolism+ko01100//Metabolic pathways
LOC_Os06g24404	0.976	10.063	3.42214	5.02779e-50	GO:0016021//integral component of membrane;GO:0031224//intrinsic component of membrane;GO:0016020//membrane;GO:0016788//hydrolase activity, acting on ester bonds;GO:0003824//catalytic activity;GO:0016787//hydrolase activity;	K14209//solute carrier family 36 (proton-coupled amino acid transporter);K10691//E3 ubiquitin-protein ligase UBR4 [EC:2.3.2.27];K00679//phospholipid:diacylglycerol acyltransferase [EC:2.3.1.158]+ko01100//Metabolic pathways+ko00561//Glycerolipid metabolism;K01188//beta-glucosidase [EC:3.2.1.21]+ko01100//Metabolic pathways+ko00500//Starch and sucrose metabolism+ko01110//Biosynthesis of secondary me…
LOC_Os01g01840	0.67	7.22	3.4123	3.06513e-32	GO:2000112//regulation of cellular macromolecule biosynthetic process;GO:0065007//biological regulation;GO:0010468//regulation of gene expression;GO:0031323//regulation of cellular metabolic process;GO:0010556//regulation of macromolecule biosynthetic process;GO:0060255//regulation of macromolecule metabolic process;GO:0006357//regulation of transcription by RNA polymerase II;GO:0019219//regulati…	K22020//mucin-19
LOC_Os02g52930	0.15	1.916	3.40296	1.18311e-16	GO:0071944//cell periphery;GO:0005886//plasma membrane;GO:0016021//integral component of membrane;GO:0016020//membrane;GO:0031224//intrinsic component of membrane;GO:0022857//transmembrane transporter activity;GO:0005215//transporter activity;	K17987//next to BRCA1 gene 1 protein
LOC_Os10g33500	0	0.39	3.38396	1.27992e-07	GO:0016020//membrane;GO:0031224//intrinsic component of membrane;GO:0016021//integral component of membrane;	K08669//HtrA serine peptidase 2 [EC:3.4.21.108]
LOC_Os12g27220	0	0.593	3.36951	1.52719e-07	GO:0016747//transferase activity, transferring acyl groups other than amino-acyl groups;GO:0003824//catalytic activity;GO:0050734//hydroxycinnamoyltransferase activity;GO:0016746//transferase activity, transferring acyl groups;GO:0016740//transferase activity;	K19861//benzyl alcohol O-benzoyltransferase [EC:2.3.1.196 2.3.1.232]
LOC_Os05g01140	0.043	0.906	3.35469	1.65196e-09	GO:0006950//response to stress;GO:0009611//response to wounding;GO:0008152//metabolic process;GO:0065007//biological regulation;GO:0042445//hormone metabolic process;GO:0019752//carboxylic acid metabolic process;GO:0010817//regulation of hormone levels;GO:0065008//regulation of biological quality;GO:0043436//oxoacid metabolic process;GO:0006082//organic acid metabolic process;GO:0050896//response…	K08241//jasmonate O-methyltransferase [EC:2.1.1.141]+ko00592//alpha-Linolenic acid metabolism+ko01110//Biosynthesis of secondary metabolites
LOC_Os06g13600	0.033	0.616	3.34913	1.68331e-10	GO:0043232//intracellular non-membrane-bounded organelle;GO:0099512//supramolecular fiber;GO:0005856//cytoskeleton;GO:0005622//intracellular;GO:0099513//polymeric cytoskeletal fiber;GO:0099080//supramolecular complex;GO:0043228//non-membrane-bounded organelle;GO:0099081//supramolecular polymer;GO:0043229//intracellular organelle;GO:0015630//microtubule cytoskeleton;GO:0005874//microtubule;GO:0043…	K14439//SWI/SNF-related matrix-associated actin-dependent regulator of chromatin subfamily A containing DEAD/H box 1 [EC:3.6.4.12]
LOC_Os05g03260	0	3.443	3.34799	1.90171e-07	GO:0050789//regulation of biological process;GO:0051252//regulation of RNA metabolic process;GO:2001141//regulation of RNA biosynthetic process;GO:0051171//regulation of nitrogen compound metabolic process;GO:0019222//regulation of metabolic process;GO:0050794//regulation of cellular process;GO:0065007//biological regulation;GO:0080090//regulation of primary metabolic process;GO:0010468//regulati…
LOC_Os01g54620	0.12	1.363	3.34284	9.30413e-20	GO:0061640//cytoskeleton-dependent cytokinesis;GO:0009987//cellular process;GO:0044237//cellular metabolic process;GO:0071669//plant-type cell wall organization or biogenesis;GO:0043170//macromolecule metabolic process;GO:0016051//carbohydrate biosynthetic process;GO:0044262//cellular carbohydrate metabolic process;GO:0009834//plant-type secondary cell wall biogenesis;GO:0007049//cell cycle;GO:19…	K10999//cellulose synthase A [EC:2.4.1.12]
LOC_Os10g40810	0	0.5	3.341	2.30984e-07	GO:2001141//regulation of RNA biosynthetic process;GO:0009893//positive regulation of metabolic process;GO:0050789//regulation of biological process;GO:1903508//positive regulation of nucleic acid-templated transcription;GO:0051171//regulation of nitrogen compound metabolic process;GO:0031323//regulation of cellular metabolic process;GO:0010604//positive regulation of macromolecule metabolic proc…	K21630//GATA-type zinc finger protein 1;K22020//mucin-19
LOC_Os10g41838	0.75	7.426	3.33848	7.70884e-21	GO:0005515//protein binding;GO:0005488//binding;GO:0046983//protein dimerization activity;	K01188//beta-glucosidase [EC:3.2.1.21]+ko01100//Metabolic pathways+ko00500//Starch and sucrose metabolism+ko01110//Biosynthesis of secondary metabolites+ko00460//Cyanoamino acid metabolism+ko00940//Phenylpropanoid biosynthesis;K18757//la-related protein 1;K02925//large subunit ribosomal protein L3e+ko03010//Ribosome
LOC_Os04g33370	0.02	0.566	3.33264	2.75894e-08	GO:0031224//intrinsic component of membrane;GO:0016020//membrane;GO:0016021//integral component of membrane;GO:0004497//monooxygenase activity;GO:0016491//oxidoreductase activity;GO:1901363//heterocyclic compound binding;GO:0046906//tetrapyrrole binding;GO:0043169//cation binding;GO:0020037//heme binding;GO:0003824//catalytic activity;GO:0097159//organic cyclic compound binding;GO:0016709//oxidor…	K21995//unsaturated fatty acid epoxidase [EC:1.14.-.-]
LOC_Os01g10110	0.086	1.08	3.31333	6.44991e-14	GO:0010033//response to organic substance;GO:0071704//organic substance metabolic process;GO:0007165//signal transduction;GO:0009725//response to hormone;GO:0071495//cellular response to endogenous stimulus;GO:0065008//regulation of biological quality;GO:0010817//regulation of hormone levels;GO:0061458//reproductive system development;GO:0009791//post-embryonic development;GO:0009308//amine metab…	K00279//cytokinin dehydrogenase [EC:1.5.99.12]+ko00908//Zeatin biosynthesis
LOC_Os01g62550	0	0.656	3.31293	2.69751e-07	GO:0031224//intrinsic component of membrane;GO:0016021//integral component of membrane;GO:0016020//membrane;	K13171//serine/arginine repetitive matrix protein 1+ko03015//mRNA surveillance pathway+ko03013//RNA transport
LOC_Os11g42220	0.013	0.556	3.27665	7.92213e-08	GO:0009808//lignin metabolic process;GO:1901361//organic cyclic compound catabolic process;GO:0044248//cellular catabolic process;GO:0071704//organic substance metabolic process;GO:0044237//cellular metabolic process;GO:0046271//phenylpropanoid catabolic process;GO:1901575//organic substance catabolic process;GO:0008152//metabolic process;GO:0019439//aromatic compound catabolic process;GO:0046274…	K05909//laccase [EC:1.10.3.2]
LOC_Os05g27590	0.02	1.07	3.26674	1.40868e-07	GO:0016021//integral component of membrane;GO:0016020//membrane;GO:0031224//intrinsic component of membrane;	K20547//basic endochitinase B [EC:3.2.1.14]+ko04016//MAPK signaling pathway - plant+ko00520//Amino sugar and nucleotide sugar metabolism+ko01100//Metabolic pathways;K02184//formin 2
LOC_Os07g11150	0.366	3.246	3.25723	3.40697e-27
LOC_Os05g30500	0.52	5.58	3.24146	9.80349e-17	GO:0003677//DNA binding;GO:0003676//nucleic acid binding;GO:0005488//binding;GO:0097159//organic cyclic compound binding;GO:0003723//RNA binding;GO:1901363//heterocyclic compound binding;	K22020//mucin-19
LOC_Os04g11970	0	0.413	3.2105	6.80286e-07	GO:0044237//cellular metabolic process;GO:0019438//aromatic compound biosynthetic process;GO:0009058//biosynthetic process;GO:0006725//cellular aromatic compound metabolic process;GO:0008152//metabolic process;GO:0009987//cellular process;GO:0044249//cellular biosynthetic process;GO:0005622//intracellular;GO:0005829//cytosol;GO:0005737//cytoplasm;GO:0003824//catalytic activity;GO:0016741//transfe…	K16040//trans-resveratrol di-O-methyltransferase [EC:2.1.1.240]+ko00945//Stilbenoid, diarylheptanoid and gingerol biosynthesis
LOC_Os01g62200	0.08	1.046	3.19394	2.01952e-10		K13172//serine/arginine repetitive matrix protein 2;K14325//RNA-binding protein with serine-rich domain 1+ko03015//mRNA surveillance pathway+ko03013//RNA transport;K13172//serine/arginine repetitive matrix protein 2;K14325//RNA-binding protein with serine-rich domain 1+ko03015//mRNA surveillance pathway+ko03013//RNA transport
LOC_Os01g02010	0.09	1.263	3.18164	1.13572e-08		K02184//formin 2
LOC_Os12g36430	0	0.19	3.15664	1.18621e-06
LOC_Os02g51380	0	1.67	3.15383	1.12598e-06
LOC_Os04g14690	1.203	10.52	3.15345	8.93613e-30	GO:0003824//catalytic activity;GO:1901363//heterocyclic compound binding;GO:0004499//N,N-dimethylaniline monooxygenase activity;GO:0016705//oxidoreductase activity, acting on paired donors, with incorporation or reduction of molecular oxygen;GO:0043168//anion binding;GO:0005488//binding;GO:0050661//NADP binding;GO:0016709//oxidoreductase activity, acting on paired donors, with incorporation or re…	K00485//dimethylaniline monooxygenase (N-oxide forming) [EC:1.14.13.8]
LOC_Os01g70240	0.94	8.89	3.13957	2.69706e-18	GO:0006812//cation transport;GO:0051234//establishment of localization;GO:0030001//metal ion transport;GO:0051179//localization;GO:0006810//transport;GO:0006811//ion transport;GO:0046872//metal ion binding;GO:0043167//ion binding;GO:0005488//binding;GO:0043169//cation binding;
LOC_Os05g34490	0.02	0.553	3.13923	1.99029e-07
LOC_Os12g12190	0	0.233	3.11287	1.595e-06	GO:0005488//binding;GO:1901363//heterocyclic compound binding;GO:0097159//organic cyclic compound binding;GO:0003676//nucleic acid binding;	K14948//polypyrimidine tract-binding protein 2
LOC_Os08g38800	0.656	5.503	3.11007	1.13063e-32
LOC_Os01g01650	0.263	2.56	3.09624	9.22947e-15		K23050//phenylcoumaran benzylic ether reductase [EC:1.3.1.-]
LOC_Os01g03680	0.086	1.326	3.09241	1.46594e-08	GO:0005576//extracellular region;GO:0030234//enzyme regulator activity;GO:0061134//peptidase regulator activity;GO:0004857//enzyme inhibitor activity;GO:0004867//serine-type endopeptidase inhibitor activity;GO:0004866//endopeptidase inhibitor activity;GO:0030414//peptidase inhibitor activity;GO:0098772//molecular function regulator;GO:0061135//endopeptidase regulator activity;	K17987//next to BRCA1 gene 1 protein
LOC_Os09g27820	0.2	1.9	3.0883	8.57135e-14	GO:0048856//anatomical structure development;GO:0000003//reproduction;GO:0010154//fruit development;GO:0032501//multicellular organismal process;GO:0042446//hormone biosynthetic process;GO:0021700//developmental maturation;GO:0009692//ethylene metabolic process;GO:0009058//biosynthetic process;GO:0008152//metabolic process;GO:0061458//reproductive system development;GO:0009693//ethylene biosynthe…	K05933//aminocyclopropanecarboxylate oxidase [EC:1.14.17.4]+ko01100//Metabolic pathways+ko01110//Biosynthesis of secondary metabolites+ko00270//Cysteine and methionine metabolism
LOC_Os02g17750	0	0.253	3.0775	2.76942e-06		K03549//KUP system potassium uptake protein;K14300//nuclear pore complex protein Nup133+ko03013//RNA transport;K21596//calmodulin-binding transcription activator;K12153//phenylalanine N-monooxygenase [EC:1.14.14.40]+ko00966//Glucosinolate biosynthesis+ko01110//Biosynthesis of secondary metabolites+ko00460//Cyanoamino acid metabolism+ko01210//2-Oxocarboxylic acid metabolism
LOC_Os04g17200	0	1.183	3.06309	2.55889e-06	GO:0031224//intrinsic component of membrane;GO:0016021//integral component of membrane;GO:0016020//membrane;GO:0046914//transition metal ion binding;GO:0043167//ion binding;GO:0043169//cation binding;GO:0008270//zinc ion binding;GO:0005488//binding;GO:0046872//metal ion binding;
LOC_Os08g28010	1.463	11.463	3.05743	1.73502e-43
LOC_Os11g33270	0.496	4.17	3.05439	5.09028e-23	GO:0044085//cellular component biogenesis;GO:0071554//cell wall organization or biogenesis;GO:0044262//cellular carbohydrate metabolic process;GO:0010410//hemicellulose metabolic process;GO:0071704//organic substance metabolic process;GO:0044042//glucan metabolic process;GO:0016043//cellular component organization;GO:0071840//cellular component organization or biogenesis;GO:0044237//cellular meta…	K08235//xyloglucan:xyloglucosyl transferase [EC:2.4.1.207]
LOC_Os05g48270	0.033	0.64	3.0471	2.04154e-07	GO:0055114//oxidation-reduction process;GO:0008152//metabolic process;GO:0031224//intrinsic component of membrane;GO:0016021//integral component of membrane;GO:0016020//membrane;GO:0004497//monooxygenase activity;GO:0016491//oxidoreductase activity;GO:0003824//catalytic activity;	K14306//nuclear pore complex protein Nup62+ko03013//RNA transport
LOC_Os01g62560	0	0.513	3.04162	3.0448e-06	GO:0031224//intrinsic component of membrane;GO:0016021//integral component of membrane;GO:0016020//membrane;	K13171//serine/arginine repetitive matrix protein 1+ko03015//mRNA surveillance pathway+ko03013//RNA transport;K03006//DNA-directed RNA polymerase II subunit RPB1 [EC:2.7.7.6]+ko03020//RNA polymerase
LOC_Os02g09930	0.11	1.073	3.03299	1.60706e-12	GO:0071840//cellular component organization or biogenesis;GO:0071554//cell wall organization or biogenesis;GO:0016043//cellular component organization;GO:0045229//external encapsulating structure organization;GO:0009987//cellular process;GO:0071555//cell wall organization;GO:0016020//membrane;GO:0098588//bounding membrane of organelle;GO:0005737//cytoplasm;GO:0043227//membrane-bounded organelle;G…	K13680//beta-mannan synthase [EC:2.4.1.32];K13680//beta-mannan synthase [EC:2.4.1.32]
LOC_Os01g54210	0	0.323	3.02394	3.47808e-06	GO:0045893//positive regulation of transcription, DNA-templated;GO:0060255//regulation of macromolecule metabolic process;GO:1903508//positive regulation of nucleic acid-templated transcription;GO:2001141//regulation of RNA biosynthetic process;GO:2000112//regulation of cellular macromolecule biosynthetic process;GO:1902680//positive regulation of RNA biosynthetic process;GO:0051171//regulation o…	K17895//GATA-binding protein 3;K21630//GATA-type zinc finger protein 1
LOC_Os08g09420	0.193	1.92	3.02182	1.26139e-11		K08332//vacuolar protein 8;K18754//protein lin-28;K10268//F-box and leucine-rich repeat protein 2/20
LOC_Os05g04380	1.9	17.216	3.02179	8.14086e-17	GO:0017001//antibiotic catabolic process;GO:0044248//cellular catabolic process;GO:0044237//cellular metabolic process;GO:0016999//antibiotic metabolic process;GO:0009987//cellular process;GO:0042743//hydrogen peroxide metabolic process;GO:0042737//drug catabolic process;GO:0008152//metabolic process;GO:0006979//response to oxidative stress;GO:0042744//hydrogen peroxide catabolic process;GO:00090…	K00430//peroxidase [EC:1.11.1.7]+ko01100//Metabolic pathways+ko01110//Biosynthesis of secondary metabolites+ko00940//Phenylpropanoid biosynthesis;K00430//peroxidase [EC:1.11.1.7]+ko01100//Metabolic pathways+ko01110//Biosynthesis of secondary metabolites+ko00940//Phenylpropanoid biosynthesis;K17987//next to BRCA1 gene 1 protein
LOC_Os11g19240	2.543	19.536	3.01446	2.69383e-41	GO:0046942//carboxylic acid transport;GO:0051179//localization;GO:0051234//establishment of localization;GO:0055085//transmembrane transport;GO:0098656//anion transmembrane transport;GO:0006820//anion transport;GO:0015849//organic acid transport;GO:0006811//ion transport;GO:0015711//organic anion transport;GO:0006865//amino acid transport;GO:0071705//nitrogen compound transport;GO:0071702//organi…	K15015//solute carrier family 32 (vesicular inhibitory amino acid transporter)
LOC_Os07g30760	0.02	0.406	2.9577	3.11018e-06	GO:0043229//intracellular organelle;GO:0043227//membrane-bounded organelle;GO:0005622//intracellular;GO:0043231//intracellular membrane-bounded organelle;GO:0043226//organelle;GO:0016758//transferase activity, transferring hexosyl groups;GO:0016740//transferase activity;GO:0016757//transferase activity, transferring glycosyl groups;GO:0003824//catalytic activity;GO:0008194//UDP-glycosyltransferas…	K13493//cytokinin-N-glucosyltransferase [EC:2.4.1.-]+ko00908//Zeatin biosynthesis+ko01110//Biosynthesis of secondary metabolites;K13030//cyanohydrin beta-glucosyltransferase [EC:2.4.1.85]+ko01110//Biosynthesis of secondary metabolites+ko00460//Cyanoamino acid metabolism;K22706//(R)-mandelonitrile beta-glucosyltransferase [EC:2.4.1.354]+ko00460//Cyanoamino acid metabolism
LOC_Os05g11010	0.24	2.54	2.94951	3.57735e-09	GO:0005886//plasma membrane;GO:0031224//intrinsic component of membrane;GO:0016021//integral component of membrane;GO:0071944//cell periphery;GO:0016020//membrane;	K00430//peroxidase [EC:1.11.1.7]+ko01100//Metabolic pathways+ko01110//Biosynthesis of secondary metabolites+ko00940//Phenylpropanoid biosynthesis
LOC_Os11g34624	0.01	0.393	2.94691	3.67009e-06	GO:0016301//kinase activity;GO:0005524//ATP binding;GO:0032553//ribonucleotide binding;GO:0000166//nucleotide binding;GO:0008144//drug binding;GO:0016772//transferase activity, transferring phosphorus-containing groups;GO:0016740//transferase activity;GO:0035639//purine ribonucleoside triphosphate binding;GO:0017076//purine nucleotide binding;GO:1901265//nucleoside phosphate binding;GO:0043168//a…	K04733//interleukin-1 receptor-associated kinase 4 [EC:2.7.11.1]
LOC_Os07g10440	0.326	3.07	2.93148	6.11523e-11
LOC_Os06g32580	0	0.413	2.92908	7.52581e-06	GO:0016021//integral component of membrane;GO:0031224//intrinsic component of membrane;GO:0016020//membrane;	K03549//KUP system potassium uptake protein;K14491//two-component response regulator ARR-B family+ko04075//Plant hormone signal transduction;K13111//WD40 repeat-containing protein SMU1
LOC_Os10g17570	0	0.313	2.92102	1.00897e-05	GO:0006284//base-excision repair;GO:0051716//cellular response to stimulus;GO:0006974//cellular response to DNA damage stimulus;GO:0006139//nucleobase-containing compound metabolic process;GO:0009987//cellular process;GO:0044237//cellular metabolic process;GO:0006807//nitrogen compound metabolic process;GO:0050896//response to stimulus;GO:0006950//response to stress;GO:0090304//nucleic acid metab…	K20093//DNA excision repair protein ERCC-6-like [EC:3.6.4.12];K12447//UDP-sugar pyrophosphorylase [EC:2.7.7.64]+ko00520//Amino sugar and nucleotide sugar metabolism+ko00040//Pentose and glucuronate interconversions+ko01100//Metabolic pathways+ko00052//Galactose metabolism+ko00053//Ascorbate and aldarate metabolism;K17545//serine/threonine-protein kinase ULK4 [EC:2.7.11.1];K06228//fused [EC:2.7.11…
LOC_Os04g34170	0.08	8.753	2.91787	1.14421e-05		K10955//mucin-2;K10955//mucin-2
LOC_Os05g43860	0.143	1.253	2.91488	2.82063e-12		K22020//mucin-19
LOC_Os01g64949	2.41	18.016	2.91313	1.54737e-20	GO:0065007//biological regulation;GO:0031323//regulation of cellular metabolic process;GO:0019219//regulation of nucleobase-containing compound metabolic process;GO:0051252//regulation of RNA metabolic process;GO:0060255//regulation of macromolecule metabolic process;GO:0051171//regulation of nitrogen compound metabolic process;GO:0010468//regulation of gene expression;GO:0009889//regulation of b…	K17604//zinc finger SWIM domain-containing protein 3
LOC_Os05g04820	0.06	0.553	2.89955	2.92331e-10	GO:0010119//regulation of stomatal movement;GO:0009987//cellular process;GO:0030154//cell differentiation;GO:0032502//developmental process;GO:0050789//regulation of biological process;GO:0050794//regulation of cellular process;GO:0065007//biological regulation;GO:0048869//cellular developmental process;GO:0043226//organelle;GO:0005634//nucleus;GO:0005622//intracellular;GO:0043231//intracellular …	K09422//transcription factor MYB, plant
LOC_Os03g28160	2.796	20.056	2.89872	1.28506e-33	GO:0008152//metabolic process;GO:0065007//biological regulation;GO:0044237//cellular metabolic process;GO:0071704//organic substance metabolic process;GO:0010556//regulation of macromolecule biosynthetic process;GO:0051252//regulation of RNA metabolic process;GO:0044238//primary metabolic process;GO:1903506//regulation of nucleic acid-templated transcription;GO:0044267//cellular protein metabolic…	K04733//interleukin-1 receptor-associated kinase 4 [EC:2.7.11.1];K18749//protein LSM14;K04733//interleukin-1 receptor-associated kinase 4 [EC:2.7.11.1];K08360//cytochrome b-561 [EC:7.2.1.3]
LOC_Os11g08230	0	0.216	2.89441	1.06625e-05	GO:0031224//intrinsic component of membrane;GO:0016020//membrane;GO:0016021//integral component of membrane;GO:0043167//ion binding;GO:0008270//zinc ion binding;GO:0003676//nucleic acid binding;GO:0046872//metal ion binding;GO:0097159//organic cyclic compound binding;GO:0046914//transition metal ion binding;GO:1901363//heterocyclic compound binding;GO:0005488//binding;GO:0043169//cation binding;	K18195//rhamnogalacturonan endolyase [EC:4.2.2.23];K19026//spatacsin;K22804//structural maintenance of chromosomes protein 6;K12598//ATP-dependent RNA helicase DOB1 [EC:3.6.4.13]+ko03018//RNA degradation;K13447//respiratory burst oxidase [EC:1.6.3.- 1.11.1.-]+ko04016//MAPK signaling pathway - plant+ko04626//Plant-pathogen interaction
LOC_Os03g56930	9.49	65.45	2.87648	6.44378e-38		K01183//chitinase [EC:3.2.1.14]+ko00520//Amino sugar and nucleotide sugar metabolism+ko01100//Metabolic pathways
LOC_Os10g28350	1.66	11.67	2.8586	6.17346e-29	GO:0000097//sulfur amino acid biosynthetic process;GO:0044272//sulfur compound biosynthetic process;GO:1901605//alpha-amino acid metabolic process;GO:0044238//primary metabolic process;GO:0008152//metabolic process;GO:0017144//drug metabolic process;GO:0009987//cellular process;GO:0043102//amino acid salvage;GO:1901576//organic substance biosynthetic process;GO:0044281//small molecule metabolic p…	K08967//1,2-dihydroxy-3-keto-5-methylthiopentene dioxygenase [EC:1.13.11.53 1.13.11.54]+ko01100//Metabolic pathways+ko00270//Cysteine and methionine metabolism
LOC_Os09g08730	0	0.26	2.84902	1.44185e-05	GO:1901363//heterocyclic compound binding;GO:0005488//binding;GO:0003723//RNA binding;GO:0097159//organic cyclic compound binding;GO:0003676//nucleic acid binding;	K17943//pumilio RNA-binding family
LOC_Os11g04010	0.093	0.913	2.83611	1.05051e-08		K22684//metacaspase-1 [EC:3.4.22.-]
LOC_Os05g48850	0.033	0.57	2.83338	2.16384e-06	GO:2001141//regulation of RNA biosynthetic process;GO:0050789//regulation of biological process;GO:0051252//regulation of RNA metabolic process;GO:0031323//regulation of cellular metabolic process;GO:0006355//regulation of transcription, DNA-templated;GO:0080090//regulation of primary metabolic process;GO:0010556//regulation of macromolecule biosynthetic process;GO:0009889//regulation of biosynth…
LOC_Os04g54810	0.093	0.75	2.83259	1.50321e-11	GO:0044260//cellular macromolecule metabolic process;GO:0009057//macromolecule catabolic process;GO:0005976//polysaccharide metabolic process;GO:0000272//polysaccharide catabolic process;GO:0044237//cellular metabolic process;GO:0031221//arabinan metabolic process;GO:0008152//metabolic process;GO:0005975//carbohydrate metabolic process;GO:0031222//arabinan catabolic process;GO:0016052//carbohydra…	K15920//xylan 1,4-beta-xylosidase [EC:3.2.1.37]+ko00520//Amino sugar and nucleotide sugar metabolism+ko01100//Metabolic pathways
LOC_Os03g03810	0.616	4.843	2.83022	3.50733e-13	GO:0006952//defense response;GO:0006950//response to stress;GO:0050896//response to stimulus;GO:0031224//intrinsic component of membrane;GO:0016020//membrane;GO:0016021//integral component of membrane;
LOC_Os07g13770	1.393	9.593	2.82709	9.20288e-26	GO:0043227//membrane-bounded organelle;GO:0043226//organelle;GO:0043231//intracellular membrane-bounded organelle;GO:0005622//intracellular;GO:0043229//intracellular organelle;GO:0016757//transferase activity, transferring glycosyl groups;GO:0016740//transferase activity;GO:0080043//quercetin 3-O-glucosyltransferase activity;GO:0016758//transferase activity, transferring hexosyl groups;GO:0008194…	K13493//cytokinin-N-glucosyltransferase [EC:2.4.1.-]+ko00908//Zeatin biosynthesis+ko01110//Biosynthesis of secondary metabolites;K13227//UDP-glucosyltransferase BX8/BX9 [EC:2.4.1.202]+ko00402//Benzoxazinoid biosynthesis
LOC_Os12g02140	0	1.696	2.79973	2.06612e-05	GO:0070011//peptidase activity, acting on L-amino acid peptides;GO:0004175//endopeptidase activity;GO:0016787//hydrolase activity;GO:0004190//aspartic-type endopeptidase activity;GO:0140096//catalytic activity, acting on a protein;GO:0070001//aspartic-type peptidase activity;GO:0008233//peptidase activity;GO:0003824//catalytic activity;
LOC_Os06g21369	0.156	1.976	2.79573	1.05719e-06	GO:0065007//biological regulation;GO:0065008//regulation of biological quality;GO:0006885//regulation of pH;GO:0055075//potassium ion homeostasis;GO:0055067//monovalent inorganic cation homeostasis;GO:0009628//response to abiotic stimulus;GO:0055080//cation homeostasis;GO:0098771//inorganic ion homeostasis;GO:0042592//homeostatic process;GO:0050801//ion homeostasis;GO:0006950//response to stress;…
LOC_Os01g49750	0.39	2.963	2.79093	1.86494e-12
LOC_Os05g02820	0.026	0.34	2.78743	7.32637e-07		K20478//golgin subfamily B member 1
LOC_Os01g63380	0.193	1.44	2.76403	1.17589e-10	GO:0065007//biological regulation;GO:0050794//regulation of cellular process;GO:0080090//regulation of primary metabolic process;GO:0006355//regulation of transcription, DNA-templated;GO:0010468//regulation of gene expression;GO:0051171//regulation of nitrogen compound metabolic process;GO:0051252//regulation of RNA metabolic process;GO:0031326//regulation of cellular biosynthetic process;GO:2001…	K17604//zinc finger SWIM domain-containing protein 3
LOC_Os07g06680	0.46	2.99	2.75016	3.15538e-22		K21952//CASK-interacting protein
LOC_Os02g30010	0.163	2.263	2.74185	6.12457e-06
LOC_Os02g46680	0	0.1	2.74135	3.20188e-05	GO:0016020//membrane;GO:0031224//intrinsic component of membrane;GO:0016021//integral component of membrane;GO:0016787//hydrolase activity;GO:0097159//organic cyclic compound binding;GO:1901265//nucleoside phosphate binding;GO:0032553//ribonucleotide binding;GO:0097367//carbohydrate derivative binding;GO:0043167//ion binding;GO:1901363//heterocyclic compound binding;GO:0036094//small molecule bin…	K05658//ATP-binding cassette, subfamily B (MDR/TAP), member 1 [EC:7.6.2.2]+ko02010//ABC transporters
LOC_Os04g32080	0	0.633	2.736	3.42874e-05	GO:0016491//oxidoreductase activity;GO:0003824//catalytic activity;	K22418//11beta/17beta-hydroxysteroid dehydrogenase [EC:1.1.1.146 1.1.1.-]
LOC_Os02g43970	0.08	0.883	2.7337	8.74915e-07	GO:0043227//membrane-bounded organelle;GO:0005622//intracellular;GO:0043226//organelle;GO:0043231//intracellular membrane-bounded organelle;GO:0005634//nucleus;GO:0043229//intracellular organelle;GO:0003676//nucleic acid binding;GO:0005488//binding;GO:1901363//heterocyclic compound binding;GO:0003677//DNA binding;GO:0140110//transcription regulator activity;GO:0003700//DNA-binding transcription f…	K09286//EREBP-like factor
LOC_Os04g01960	0.09	1.126	2.71858	2.97317e-06	GO:0031224//intrinsic component of membrane;GO:0016020//membrane;GO:0016021//integral component of membrane;	K17987//next to BRCA1 gene 1 protein;K12900//FUS-interacting serine-arginine-rich protein 1+ko03040//Spliceosome
LOC_Os09g25610	1.716	11.146	2.71416	8.32006e-21	GO:0044281//small molecule metabolic process;GO:0044238//primary metabolic process;GO:0019752//carboxylic acid metabolic process;GO:0008152//metabolic process;GO:0071704//organic substance metabolic process;GO:0006541//glutamine metabolic process;GO:0006807//nitrogen compound metabolic process;GO:0009064//glutamine family amino acid metabolic process;GO:0043436//oxoacid metabolic process;GO:19016…	K22314//glucosinolate gamma-glutamyl hydrolase [EC:3.4.19.16]
LOC_Os11g17954	0.04	0.516	2.70922	2.93759e-06		K20368//protein cornichon;K03139//transcription initiation factor TFIIF subunit beta [EC:3.6.4.12]+ko03022//Basal transcription factors;K04706//E3 SUMO-protein ligase PIAS1 [EC:2.3.2.-]+ko04120//Ubiquitin mediated proteolysis
LOC_Os07g33910	1.04	6.376	2.69549	1.01429e-26	GO:0005794//Golgi apparatus;GO:0043226//organelle;GO:0016021//integral component of membrane;GO:0012505//endomembrane system;GO:0043229//intracellular organelle;GO:0043231//intracellular membrane-bounded organelle;GO:0005737//cytoplasm;GO:0005622//intracellular;GO:0043227//membrane-bounded organelle;GO:0031224//intrinsic component of membrane;GO:0016020//membrane;GO:0005215//transporter activity;…	K15283//solute carrier family 35, member E1
LOC_Os07g01904	19.12	106.383	2.6879	2.25044e-14	GO:0031224//intrinsic component of membrane;GO:0016021//integral component of membrane;GO:0016020//membrane;
LOC_Os04g52790	0	0.87	2.68377	4.85501e-05		K13172//serine/arginine repetitive matrix protein 2;K14325//RNA-binding protein with serine-rich domain 1+ko03015//mRNA surveillance pathway+ko03013//RNA transport
LOC_Os08g28000	0	2.216	2.67125	5.37143e-05
LOC_Os01g42210	0.673	4.62	2.67102	9.28827e-12	GO:0016020//membrane;GO:0031224//intrinsic component of membrane;GO:0016021//integral component of membrane;GO:0043167//ion binding;GO:0035639//purine ribonucleoside triphosphate binding;GO:0043168//anion binding;GO:1901265//nucleoside phosphate binding;GO:0017076//purine nucleotide binding;GO:0000166//nucleotide binding;GO:0032559//adenyl ribonucleotide binding;GO:0032555//purine ribonucleotide …	K20547//basic endochitinase B [EC:3.2.1.14]+ko04016//MAPK signaling pathway - plant+ko00520//Amino sugar and nucleotide sugar metabolism+ko01100//Metabolic pathways
LOC_Os01g62480	0	0.23	2.66479	5.7405e-05	GO:0008152//metabolic process;GO:0009698//phenylpropanoid metabolic process;GO:0009056//catabolic process;GO:0071704//organic substance metabolic process;GO:0019439//aromatic compound catabolic process;GO:0019748//secondary metabolic process;GO:0006725//cellular aromatic compound metabolic process;GO:0046274//lignin catabolic process;GO:0046271//phenylpropanoid catabolic process;GO:0044237//cellu…	K05909//laccase [EC:1.10.3.2]
LOC_Os04g32540	0.03	0.353	2.66387	1.01721e-05	GO:0051603//proteolysis involved in cellular protein catabolic process;GO:0006508//proteolysis;GO:0009987//cellular process;GO:0044267//cellular protein metabolic process;GO:0019538//protein metabolic process;GO:1901565//organonitrogen compound catabolic process;GO:0008152//metabolic process;GO:0009057//macromolecule catabolic process;GO:0009056//catabolic process;GO:0006807//nitrogen compound me…	K16297//serine carboxypeptidase-like clade II [EC:3.4.16.-];K16297//serine carboxypeptidase-like clade II [EC:3.4.16.-]
LOC_Os07g34006	6.023	35.206	2.66264	1.95543e-43	GO:0031224//intrinsic component of membrane;GO:0016020//membrane;GO:0016021//integral component of membrane;GO:0005215//transporter activity;GO:0022857//transmembrane transporter activity;	K15283//solute carrier family 35, member E1
LOC_Os01g42690	0.816	5.44	2.65708	1.65932e-12	GO:0016787//hydrolase activity;GO:0003824//catalytic activity;	K06130//lysophospholipase II [EC:3.1.1.5]+ko00564//Glycerophospholipid metabolism;K06130//lysophospholipase II [EC:3.1.1.5]+ko00564//Glycerophospholipid metabolism
LOC_Os07g40130	0.236	2.13	2.65034	6.32867e-07		K21952//CASK-interacting protein
LOC_Os03g01270	0.046	0.6	2.63722	7.80987e-06	GO:0019953//sexual reproduction;GO:0051704//multi-organism process;GO:0071555//cell wall organization;GO:0000003//reproduction;GO:0022414//reproductive process;GO:0071554//cell wall organization or biogenesis;GO:0071840//cellular component organization or biogenesis;GO:0016043//cellular component organization;GO:0044703//multi-organism reproductive process;GO:0009987//cellular process;GO:0045229/…	K20628//expansin;K20628//expansin
LOC_Os04g58920	0.01	0.31	2.6308	4.69128e-05	GO:0005199//structural constituent of cell wall;GO:0005198//structural molecule activity;	K02184//formin 2
LOC_Os11g10710	0.18	1.22	2.60363	7.00855e-11	GO:0032559//adenyl ribonucleotide binding;GO:0000166//nucleotide binding;GO:1901363//heterocyclic compound binding;GO:0140096//catalytic activity, acting on a protein;GO:0005524//ATP binding;GO:1901265//nucleoside phosphate binding;GO:0005488//binding;GO:0003824//catalytic activity;GO:0004672//protein kinase activity;GO:0097159//organic cyclic compound binding;GO:0043167//ion binding;GO:0016740//…	K17302//coatomer subunit beta'
LOC_Os05g17830	0	0.08	2.60074	8.66158e-05	GO:0044237//cellular metabolic process;GO:0044260//cellular macromolecule metabolic process;GO:0071704//organic substance metabolic process;GO:0034641//cellular nitrogen compound metabolic process;GO:0006259//DNA metabolic process;GO:0044238//primary metabolic process;GO:0006807//nitrogen compound metabolic process;GO:0090304//nucleic acid metabolic process;GO:0046483//heterocycle metabolic proce…	K09338//homeobox-leucine zipper protein;K19525//vacuolar protein sorting-associated protein 13A/C;K00102//D-lactate dehydrogenase (cytochrome) [EC:1.1.2.4]+ko00620//Pyruvate metabolism;K03686//molecular chaperone DnaJ
LOC_Os12g01560	0.016	0.303	2.59441	6.59851e-05	GO:0012505//endomembrane system;GO:0043231//intracellular membrane-bounded organelle;GO:0005737//cytoplasm;GO:0031224//intrinsic component of membrane;GO:0005794//Golgi apparatus;GO:0016021//integral component of membrane;GO:0016020//membrane;GO:0005622//intracellular;GO:0043229//intracellular organelle;GO:0043226//organelle;GO:0043227//membrane-bounded organelle;GO:0003824//catalytic activity;GO…
LOC_Os06g24040	2.13	13.496	2.59322	1.27199e-12
LOC_Os05g30700	1.246	7.093	2.59263	2.35556e-29	GO:0006887//exocytosis;GO:0009987//cellular process;GO:0016192//vesicle-mediated transport;GO:0006810//transport;GO:0046903//secretion;GO:0051234//establishment of localization;GO:0051179//localization;GO:0032940//secretion by cell;GO:0033036//macromolecule localization;GO:0015833//peptide transport;GO:0008104//protein localization;GO:0071705//nitrogen compound transport;GO:0071702//organic subst…	K07195//exocyst complex component 7
LOC_Os06g03400	0.083	1.646	2.58568	6.73621e-05	GO:0071704//organic substance metabolic process;GO:0044260//cellular macromolecule metabolic process;GO:0006139//nucleobase-containing compound metabolic process;GO:0046483//heterocycle metabolic process;GO:0043170//macromolecule metabolic process;GO:0034641//cellular nitrogen compound metabolic process;GO:0006807//nitrogen compound metabolic process;GO:0044238//primary metabolic process;GO:00442…
LOC_Os03g45920	0.97	5.48	2.58315	4.22893e-25	GO:0007010//cytoskeleton organization;GO:0016043//cellular component organization;GO:0007017//microtubule-based process;GO:0071840//cellular component organization or biogenesis;GO:0009987//cellular process;GO:0000226//microtubule cytoskeleton organization;GO:0007049//cell cycle;GO:0006996//organelle organization;GO:0000278//mitotic cell cycle;GO:0005856//cytoskeleton;GO:0015630//microtubule cyto…	K07375//tubulin beta+ko04145//Phagosome
LOC_Os12g10900	0	0.076	2.5779	0.000100379	GO:0006974//cellular response to DNA damage stimulus;GO:0046483//heterocycle metabolic process;GO:0044238//primary metabolic process;GO:0006139//nucleobase-containing compound metabolic process;GO:0006259//DNA metabolic process;GO:0044237//cellular metabolic process;GO:0006725//cellular aromatic compound metabolic process;GO:0006281//DNA repair;GO:0044260//cellular macromolecule metabolic process…	K17545//serine/threonine-protein kinase ULK4 [EC:2.7.11.1];K06228//fused [EC:2.7.11.1];K20093//DNA excision repair protein ERCC-6-like [EC:3.6.4.12];K12447//UDP-sugar pyrophosphorylase [EC:2.7.7.64]+ko00520//Amino sugar and nucleotide sugar metabolism+ko00040//Pentose and glucuronate interconversions+ko01100//Metabolic pathways+ko00052//Galactose metabolism+ko00053//Ascorbate and aldarate metabol…
LOC_Os08g38270	0.08	0.813	2.57114	5.2703e-06	GO:0071554//cell wall organization or biogenesis;GO:0071669//plant-type cell wall organization or biogenesis;GO:0009987//cellular process;GO:0009834//plant-type secondary cell wall biogenesis;GO:0042546//cell wall biogenesis;GO:0071840//cellular component organization or biogenesis;GO:0044085//cellular component biogenesis;GO:0009832//plant-type cell wall biogenesis;GO:0005886//plasma membrane;GO…	K13171//serine/arginine repetitive matrix protein 1+ko03015//mRNA surveillance pathway+ko03013//RNA transport
LOC_Os06g03640	0.63	3.543	2.56648	9.73397e-26	GO:0005488//binding;GO:0005515//protein binding;GO:0051087//chaperone binding;	K09555//BCL2-associated athanogene 1+ko04141//Protein processing in endoplasmic reticulum;K22020//mucin-19
LOC_Os08g14190	2.126	11.623	2.56519	1.30167e-42	GO:0003824//catalytic activity;GO:0016740//transferase activity;GO:0008146//sulfotransferase activity;GO:0016782//transferase activity, transferring sulfur-containing groups;	K22312//hydroxyjasmonate sulfotransferase [EC:2.8.2.39]
LOC_Os01g66200	0.416	2.563	2.56226	1.62449e-12
LOC_Os01g46350	0.06	0.43	2.55792	7.05766e-07	GO:0012505//endomembrane system;GO:0043231//intracellular membrane-bounded organelle;GO:0043229//intracellular organelle;GO:0043226//organelle;GO:0005794//Golgi apparatus;GO:0005737//cytoplasm;GO:0005622//intracellular;GO:0043227//membrane-bounded organelle;GO:0016413//O-acetyltransferase activity;GO:0016746//transferase activity, transferring acyl groups;GO:0016407//acetyltransferase activity;GO…	K00430//peroxidase [EC:1.11.1.7]+ko01100//Metabolic pathways+ko01110//Biosynthesis of secondary metabolites+ko00940//Phenylpropanoid biosynthesis
LOC_Os07g41060	0.163	1.183	2.54429	1.4193e-07	GO:0016614//oxidoreductase activity, acting on CH-OH group of donors;GO:0016491//oxidoreductase activity;GO:0003824//catalytic activity;GO:0016616//oxidoreductase activity, acting on the CH-OH group of donors, NAD or NADP as acceptor;GO:0005488//binding;	K09753//cinnamoyl-CoA reductase [EC:1.2.1.44]+ko01100//Metabolic pathways+ko01110//Biosynthesis of secondary metabolites+ko00940//Phenylpropanoid biosynthesis;K13082//bifunctional dihydroflavonol 4-reductase/flavanone 4-reductase [EC:1.1.1.219 1.1.1.234]+ko01100//Metabolic pathways+ko01110//Biosynthesis of secondary metabolites+ko00941//Flavonoid biosynthesis
LOC_Os09g04920	0.25	2.296	2.52856	1.30219e-05	GO:0006725//cellular aromatic compound metabolic process;GO:0046483//heterocycle metabolic process;GO:0090304//nucleic acid metabolic process;GO:0034641//cellular nitrogen compound metabolic process;GO:0044237//cellular metabolic process;GO:0006807//nitrogen compound metabolic process;GO:0044238//primary metabolic process;GO:0009987//cellular process;GO:0043170//macromolecule metabolic process;GO…
LOC_Os03g57460	0.06	0.473	2.52839	6.72573e-06		K13172//serine/arginine repetitive matrix protein 2
LOC_Os12g12514	0.576	3.4	2.52635	1.08288e-13	GO:0055114//oxidation-reduction process;GO:0008152//metabolic process;GO:0016491//oxidoreductase activity;GO:0003824//catalytic activity;	K07119//uncharacterized protein;K19825//2-alkenal reductase (NADP+) [EC:1.3.1.102]
LOC_Os07g01580	0.166	2.213	2.51802	4.20202e-05
LOC_Os05g25800	0.023	0.47	2.50761	0.000111158	GO:0006259//DNA metabolic process;GO:1901360//organic cyclic compound metabolic process;GO:0044238//primary metabolic process;GO:0071704//organic substance metabolic process;GO:0046483//heterocycle metabolic process;GO:0006310//DNA recombination;GO:0044237//cellular metabolic process;GO:0006725//cellular aromatic compound metabolic process;GO:0009987//cellular process;GO:0032196//transposition;GO…	K10955//mucin-2
LOC_Os09g28690	0.143	0.99	2.49841	8.67894e-08	GO:0003824//catalytic activity;GO:0016787//hydrolase activity;	K20506//tuliposide A-converting enzyme [EC:4.2.99.22];K17872//demethylphylloquinone reductase [EC:1.6.5.12]+ko00130//Ubiquinone and other terpenoid-quinone biosynthesis+ko01100//Metabolic pathways+ko01110//Biosynthesis of secondary metabolites;K13258//2-hydroxyisoflavanone dehydratase [EC:4.2.1.105]+ko01110//Biosynthesis of secondary metabolites+ko00943//Isoflavonoid biosynthesis
LOC_Os02g34130	0.05	0.4	2.48413	3.05561e-06		K14300//nuclear pore complex protein Nup133+ko03013//RNA transport;K03549//KUP system potassium uptake protein;K12153//phenylalanine N-monooxygenase [EC:1.14.14.40]+ko00966//Glucosinolate biosynthesis+ko01110//Biosynthesis of secondary metabolites+ko00460//Cyanoamino acid metabolism+ko01210//2-Oxocarboxylic acid metabolism;K12614//ATP-dependent RNA helicase DDX6/DHH1 [EC:3.6.4.13]+ko03018//RNA de…
LOC_Os03g03600	0.42	2.376	2.48012	1.78027e-13	GO:0071944//cell periphery;GO:0046658//anchored component of plasma membrane;GO:0031225//anchored component of membrane;GO:0005886//plasma membrane;GO:0031226//intrinsic component of plasma membrane;GO:0016020//membrane;GO:0031224//intrinsic component of membrane;	K13172//serine/arginine repetitive matrix protein 2
LOC_Os09g31930	0.006	0.186	2.47987	0.000147237	GO:0006725//cellular aromatic compound metabolic process;GO:0008152//metabolic process;GO:0009987//cellular process;GO:0006139//nucleobase-containing compound metabolic process;GO:0071704//organic substance metabolic process;GO:0015074//DNA integration;GO:0006259//DNA metabolic process;GO:1901360//organic cyclic compound metabolic process;GO:0046483//heterocycle metabolic process;GO:0043170//macr…	K09338//homeobox-leucine zipper protein;K19525//vacuolar protein sorting-associated protein 13A/C;K00102//D-lactate dehydrogenase (cytochrome) [EC:1.1.2.4]+ko00620//Pyruvate metabolism;K12396//AP-3 complex subunit delta
LOC_Os03g02040	0.066	0.65	2.46613	2.89787e-05		K08360//cytochrome b-561 [EC:7.2.1.3];K22455//estrogen receptor-binding fragment-associated gene 9 protein
LOC_Os02g19640	0.05	0.466	2.46039	2.33414e-05		K22020//mucin-19
LOC_Os02g11020	0.26	1.7	2.45087	2.9434e-07	GO:0016020//membrane;GO:0016021//integral component of membrane;GO:0031224//intrinsic component of membrane;GO:0046914//transition metal ion binding;GO:0046906//tetrapyrrole binding;GO:0097159//organic cyclic compound binding;GO:0003824//catalytic activity;GO:0046872//metal ion binding;GO:0016705//oxidoreductase activity, acting on paired donors, with incorporation or reduction of molecular oxyge…	K15639//PHYB activation tagged suppressor 1 [EC:1.14.-.-]+ko00905//Brassinosteroid biosynthesis
LOC_Os01g47400	0.42	2.283	2.4475	1.61194e-14	GO:0044264//cellular polysaccharide metabolic process;GO:0044036//cell wall macromolecule metabolic process;GO:0046355//mannan catabolic process;GO:0044238//primary metabolic process;GO:0016998//cell wall macromolecule catabolic process;GO:0043170//macromolecule metabolic process;GO:0009057//macromolecule catabolic process;GO:0044248//cellular catabolic process;GO:1901575//organic substance catab…	K19355//mannan endo-1,4-beta-mannosidase [EC:3.2.1.78]+ko00051//Fructose and mannose metabolism;K19355//mannan endo-1,4-beta-mannosidase [EC:3.2.1.78]+ko00051//Fructose and mannose metabolism
LOC_Os09g36700	0.74	4.103	2.44378	3.21484e-12	GO:0043170//macromolecule metabolic process;GO:0009056//catabolic process;GO:0044248//cellular catabolic process;GO:0034641//cellular nitrogen compound metabolic process;GO:1901360//organic cyclic compound metabolic process;GO:0090304//nucleic acid metabolic process;GO:0044237//cellular metabolic process;GO:0006401//RNA catabolic process;GO:0044265//cellular macromolecule catabolic process;GO:004…	K01166//ribonuclease T2 [EC:3.1.27.1]
LOC_Os03g01300	12.663	99.853	2.44043	1.22182e-05
LOC_Os04g55710	66.783	332.183	2.43724	2.23336e-38	GO:0034641//cellular nitrogen compound metabolic process;GO:0006807//nitrogen compound metabolic process;GO:0006520//cellular amino acid metabolic process;GO:0044248//cellular catabolic process;GO:0071704//organic substance metabolic process;GO:0009987//cellular process;GO:1901575//organic substance catabolic process;GO:0009065//glutamine family amino acid catabolic process;GO:0044238//primary me…	K13051//beta-aspartyl-peptidase (threonine type) [EC:3.4.19.5]
LOC_Os05g43880	0.05	0.606	2.43713	8.05621e-05	GO:0046872//metal ion binding;GO:0003824//catalytic activity;GO:0016491//oxidoreductase activity;GO:0043167//ion binding;GO:0043169//cation binding;GO:0005488//binding;GO:0051213//dioxygenase activity;	K04125//gibberellin 2beta-dioxygenase [EC:1.14.11.13]+ko00904//Diterpenoid biosynthesis+ko01110//Biosynthesis of secondary metabolites
LOC_Os01g60940	0.033	0.526	2.4343	0.00013067		K13171//serine/arginine repetitive matrix protein 1+ko03015//mRNA surveillance pathway+ko03013//RNA transport;K13172//serine/arginine repetitive matrix protein 2
LOC_Os01g71090	0.05	0.426	2.4305	2.27618e-05	GO:0010410//hemicellulose metabolic process;GO:0000272//polysaccharide catabolic process;GO:0016052//carbohydrate catabolic process;GO:0019538//protein metabolic process;GO:0044036//cell wall macromolecule metabolic process;GO:0009987//cellular process;GO:1901575//organic substance catabolic process;GO:0044237//cellular metabolic process;GO:0010383//cell wall polysaccharide metabolic process;GO:0…	K13172//serine/arginine repetitive matrix protein 2;K09566//peptidyl-prolyl isomerase G (cyclophilin G) [EC:5.2.1.8]
LOC_Os10g35160	0.06	0.41	2.42902	2.2925e-05
LOC_Os12g02370	1.57	7.816	2.42356	4.08817e-29	GO:0003824//catalytic activity;GO:0016853//isomerase activity;GO:0016872//intramolecular lyase activity;	K01859//chalcone isomerase [EC:5.5.1.6]+ko01100//Metabolic pathways+ko01110//Biosynthesis of secondary metabolites+ko00941//Flavonoid biosynthesis;K01859//chalcone isomerase [EC:5.5.1.6]+ko01100//Metabolic pathways+ko01110//Biosynthesis of secondary metabolites+ko00941//Flavonoid biosynthesis
LOC_Os06g06340	0.243	2.186	2.42023	2.65847e-05	GO:0051179//localization;GO:0051234//establishment of localization;GO:0010876//lipid localization;GO:0006869//lipid transport;GO:0006810//transport;GO:0071702//organic substance transport;GO:0033036//macromolecule localization;GO:0008289//lipid binding;GO:0005488//binding;	K14325//RNA-binding protein with serine-rich domain 1+ko03015//mRNA surveillance pathway+ko03013//RNA transport;K00430//peroxidase [EC:1.11.1.7]+ko01100//Metabolic pathways+ko01110//Biosynthesis of secondary metabolites+ko00940//Phenylpropanoid biosynthesis;K13171//serine/arginine repetitive matrix protein 1+ko03015//mRNA surveillance pathway+ko03013//RNA transport
LOC_Os06g04930	0	0.436	2.41488	0.000283004	GO:0016021//integral component of membrane;GO:0031224//intrinsic component of membrane;GO:0016020//membrane;
LOC_Os03g25440	2.126	10.646	2.40706	1.62853e-23	GO:0009900//dehiscence;GO:0032504//multicellular organism reproduction;GO:0010256//endomembrane system organization;GO:0032501//multicellular organismal process;GO:0007275//multicellular organism development;GO:0071840//cellular component organization or biogenesis;GO:0016043//cellular component organization;GO:0000003//reproduction;GO:0009838//abscission;GO:0022414//reproductive process;GO:00099…	K03006//DNA-directed RNA polymerase II subunit RPB1 [EC:2.7.7.6]+ko03020//RNA polymerase
LOC_Os06g49190	0.25	1.72	2.4062	2.47485e-06	GO:0006810//transport;GO:0071702//organic substance transport;GO:0051179//localization;GO:0010876//lipid localization;GO:0033036//macromolecule localization;GO:0051234//establishment of localization;GO:0006869//lipid transport;
LOC_Os04g38220	0.38	2.29	2.40601	3.66468e-08	GO:0051234//establishment of localization;GO:0006810//transport;GO:0071702//organic substance transport;GO:0008643//carbohydrate transport;GO:0051179//localization;GO:0071944//cell periphery;GO:0016021//integral component of membrane;GO:0016020//membrane;GO:0005887//integral component of plasma membrane;GO:0031226//intrinsic component of plasma membrane;GO:0005886//plasma membrane;GO:0031224//int…	K08150//MFS transporter, SP family, solute carrier family 2 (myo-inositol transporter), member 13;K08145//MFS transporter, SP family, solute carrier family 2 (facilitated glucose transporter), member 8
LOC_Os03g02750	0.436	2.223	2.40471	2.49026e-19	GO:0070011//peptidase activity, acting on L-amino acid peptides;GO:0016787//hydrolase activity;GO:0004175//endopeptidase activity;GO:0004252//serine-type endopeptidase activity;GO:0140096//catalytic activity, acting on a protein;GO:0003824//catalytic activity;GO:0017171//serine hydrolase activity;GO:0008236//serine-type peptidase activity;GO:0008233//peptidase activity;	K15333//tRNA guanosine-2'-O-methyltransferase [EC:2.1.1.34];K14568//rRNA small subunit pseudouridine methyltransferase Nep1 [EC:2.1.1.260]+ko03008//Ribosome biogenesis in eukaryotes;K12900//FUS-interacting serine-arginine-rich protein 1+ko03040//Spliceosome
LOC_Os05g05030	13.233	63.966	2.40357	1.59544e-53
LOC_Os09g35600	0.103	0.803	2.38859	1.43744e-05	GO:0051179//localization;GO:0055085//transmembrane transport;GO:0042493//response to drug;GO:0042221//response to chemical;GO:0051234//establishment of localization;GO:0006855//drug transmembrane transport;GO:0050896//response to stimulus;GO:0006810//transport;GO:0015893//drug transport;GO:0031224//intrinsic component of membrane;GO:0016021//integral component of membrane;GO:0016020//membrane;GO:…	K03327//multidrug resistance protein, MATE family
LOC_Os01g47370	20.323	102.223	2.38832	1.50735e-18	GO:0005488//binding;GO:0003677//DNA binding;GO:0097159//organic cyclic compound binding;GO:0003676//nucleic acid binding;GO:1901363//heterocyclic compound binding;	K15397//3-ketoacyl-CoA synthase [EC:2.3.1.199]+ko01100//Metabolic pathways+ko01110//Biosynthesis of secondary metabolites+ko00062//Fatty acid elongation
LOC_Os02g46970	0.21	1.14	2.37439	9.10744e-11	GO:0045229//external encapsulating structure organization;GO:0032502//developmental process;GO:0010927//cellular component assembly involved in morphogenesis;GO:0009555//pollen development;GO:0044085//cellular component biogenesis;GO:0010208//pollen wall assembly;GO:0032501//multicellular organismal process;GO:0016043//cellular component organization;GO:0010584//pollen exine formation;GO:0009653/…	K01904//4-coumarate--CoA ligase [EC:6.2.1.12]+ko00130//Ubiquinone and other terpenoid-quinone biosynthesis+ko01100//Metabolic pathways+ko01110//Biosynthesis of secondary metabolites+ko00940//Phenylpropanoid biosynthesis+ko00360//Phenylalanine metabolism
LOC_Os07g49310	5.983	28.446	2.36416	1.07661e-31	GO:0008152//metabolic process;GO:0044238//primary metabolic process;GO:0071704//organic substance metabolic process;GO:0006629//lipid metabolic process;GO:0031224//intrinsic component of membrane;GO:0016020//membrane;GO:0016021//integral component of membrane;GO:0016717//oxidoreductase activity, acting on paired donors, with oxidation of a pair of donors resulting in the reduction of molecular ox…	K10257//acyl-lipid omega-3 desaturase [EC:1.14.19.25 1.14.19.35 1.14.19.36];K10257//acyl-lipid omega-3 desaturase [EC:1.14.19.25 1.14.19.35 1.14.19.36]
LOC_Os03g42920	0.47	4.39	2.35639	0.000101205	GO:0016021//integral component of membrane;GO:0031224//intrinsic component of membrane;GO:0016020//membrane;GO:0005199//structural constituent of cell wall;GO:0005198//structural molecule activity;	K04733//interleukin-1 receptor-associated kinase 4 [EC:2.7.11.1];K00430//peroxidase [EC:1.11.1.7]+ko01100//Metabolic pathways+ko01110//Biosynthesis of secondary metabolites+ko00940//Phenylpropanoid biosynthesis
LOC_Os05g47700	0.823	4.376	2.35091	3.05697e-10		K00703//starch synthase [EC:2.4.1.21]+ko01100//Metabolic pathways+ko00500//Starch and sucrose metabolism+ko01110//Biosynthesis of secondary metabolites;K02184//formin 2
LOC_Os03g14250	0.286	1.396	2.34999	5.40956e-19		K10352//myosin heavy chain
LOC_Os08g06380	1.523	7.5	2.34782	1.93901e-13	GO:1903047//mitotic cell cycle process;GO:0044262//cellular carbohydrate metabolic process;GO:0071554//cell wall organization or biogenesis;GO:0033692//cellular polysaccharide biosynthetic process;GO:0071704//organic substance metabolic process;GO:0030244//cellulose biosynthetic process;GO:0034645//cellular macromolecule biosynthetic process;GO:0000278//mitotic cell cycle;GO:0005975//carbohydrate…	K20923//mixed-linked glucan synthase [EC:2.4.1.-];K20923//mixed-linked glucan synthase [EC:2.4.1.-]
LOC_Os04g46400	0	0.286	2.34179	0.000437633	GO:0043226//organelle;GO:0005622//intracellular;GO:0043227//membrane-bounded organelle;GO:0005634//nucleus;GO:0043231//intracellular membrane-bounded organelle;GO:0043229//intracellular organelle;GO:0140110//transcription regulator activity;GO:0005488//binding;GO:0003677//DNA binding;GO:0003676//nucleic acid binding;GO:0003700//DNA-binding transcription factor activity;GO:1901363//heterocyclic co…	K09286//EREBP-like factor
LOC_Os11g42500	0.29	1.62	2.33801	4.80911e-08	GO:0048046//apoplast;GO:0005576//extracellular region;	K01870//isoleucyl-tRNA synthetase [EC:6.1.1.5]+ko00970//Aminoacyl-tRNA biosynthesis;K06627//cyclin-A;K00430//peroxidase [EC:1.11.1.7]+ko01100//Metabolic pathways+ko01110//Biosynthesis of secondary metabolites+ko00940//Phenylpropanoid biosynthesis
LOC_Os07g44090	0.01	0.26	2.33758	0.000376286	GO:0048869//cellular developmental process;GO:0009987//cellular process;GO:0032502//developmental process;GO:0030154//cell differentiation;GO:0005634//nucleus;GO:0043231//intracellular membrane-bounded organelle;GO:0043227//membrane-bounded organelle;GO:0043226//organelle;GO:0043229//intracellular organelle;GO:0005622//intracellular;GO:0043565//sequence-specific DNA binding;GO:0003676//nucleic ac…	K09422//transcription factor MYB, plant;K02184//formin 2;K09422//transcription factor MYB, plant;K09422//transcription factor MYB, plant
LOC_Os12g07560	0.036	0.603	2.33664	0.0003149		K02184//formin 2
LOC_Os02g56390	0.023	0.173	2.32807	0.000128127	GO:0008270//zinc ion binding;GO:0046914//transition metal ion binding;GO:1901363//heterocyclic compound binding;GO:0003676//nucleic acid binding;GO:0043167//ion binding;GO:0005488//binding;GO:0046872//metal ion binding;GO:0097159//organic cyclic compound binding;GO:0043169//cation binding;	K17604//zinc finger SWIM domain-containing protein 3;K11816//indole-3-pyruvate monooxygenase [EC:1.14.13.168]+ko00380//Tryptophan metabolism+ko01100//Metabolic pathways
LOC_Os09g25000	0.123	0.763	2.32692	2.64069e-06		K03695//ATP-dependent Clp protease ATP-binding subunit ClpB;K22020//mucin-19
LOC_Os05g09740	0.046	0.526	2.32573	0.000173105	GO:0003824//catalytic activity;GO:0003993//acid phosphatase activity;GO:0016791//phosphatase activity;GO:0042578//phosphoric ester hydrolase activity;GO:0016787//hydrolase activity;GO:0016788//hydrolase activity, acting on ester bonds;	K20728//vegetative storage protein 2+ko04016//MAPK signaling pathway - plant
LOC_Os05g09724	0.093	0.7	2.31665	3.99601e-05	GO:0016788//hydrolase activity, acting on ester bonds;GO:0003824//catalytic activity;GO:0003993//acid phosphatase activity;GO:0016787//hydrolase activity;GO:0042578//phosphoric ester hydrolase activity;GO:0016791//phosphatase activity;	K20728//vegetative storage protein 2+ko04016//MAPK signaling pathway - plant
LOC_Os12g26630	0	0.12	2.31224	0.000520094	GO:0015074//DNA integration;GO:0034641//cellular nitrogen compound metabolic process;GO:0046483//heterocycle metabolic process;GO:1901360//organic cyclic compound metabolic process;GO:0006725//cellular aromatic compound metabolic process;GO:0090304//nucleic acid metabolic process;GO:0044260//cellular macromolecule metabolic process;GO:0043170//macromolecule metabolic process;GO:0006807//nitrogen …	K03549//KUP system potassium uptake protein;K14300//nuclear pore complex protein Nup133+ko03013//RNA transport;K21596//calmodulin-binding transcription activator;K14491//two-component response regulator ARR-B family+ko04075//Plant hormone signal transduction
LOC_Os01g57004	2.963	14.273	2.31216	4.0643e-16	GO:0071944//cell periphery;GO:0005886//plasma membrane;GO:0016020//membrane;
LOC_Os03g59210	0.953	7.196	2.31113	4.77293e-05
LOC_Os07g33860	0.32	2.166	2.31054	5.00128e-05	GO:0043170//macromolecule metabolic process;GO:0006807//nitrogen compound metabolic process;GO:1901566//organonitrogen compound biosynthetic process;GO:0009987//cellular process;GO:0044238//primary metabolic process;GO:1901576//organic substance biosynthetic process;GO:0044260//cellular macromolecule metabolic process;GO:0009059//macromolecule biosynthetic process;GO:0034641//cellular nitrogen co…	K02929//large subunit ribosomal protein L44e+ko03010//Ribosome
LOC_Os03g13050	1.92	9.063	2.30963	3.48449e-20	GO:0072503//cellular divalent inorganic cation homeostasis;GO:0019725//cellular homeostasis;GO:0006873//cellular ion homeostasis;GO:0050801//ion homeostasis;GO:0055074//calcium ion homeostasis;GO:0055065//metal ion homeostasis;GO:0048878//chemical homeostasis;GO:0006874//cellular calcium ion homeostasis;GO:0006875//cellular metal ion homeostasis;GO:0042592//homeostatic process;GO:0065008//regulat…	K20858//calcium uniporter protein, mitochondrial
LOC_Os03g17480	8.333	60.943	2.30886	5.20972e-05	GO:0071704//organic substance metabolic process;GO:0036211//protein modification process;GO:0044260//cellular macromolecule metabolic process;GO:0044238//primary metabolic process;GO:0044237//cellular metabolic process;GO:0043170//macromolecule metabolic process;GO:0006807//nitrogen compound metabolic process;GO:0043412//macromolecule modification;GO:0009987//cellular process;GO:0006464//cellular…	K00799//glutathione S-transferase [EC:2.5.1.18]+ko00480//Glutathione metabolism
LOC_Os06g50950	2.403	11.57	2.30772	7.07688e-14	GO:0016788//hydrolase activity, acting on ester bonds;GO:0003824//catalytic activity;GO:0016787//hydrolase activity;	K21952//CASK-interacting protein
LOC_Os04g27790	0.176	0.983	2.30621	1.25221e-07	GO:0046872//metal ion binding;GO:0043167//ion binding;GO:0005488//binding;GO:0016838//carbon-oxygen lyase activity, acting on phosphates;GO:0010333//terpene synthase activity;GO:0000287//magnesium ion binding;GO:0016835//carbon-oxygen lyase activity;GO:0016829//lyase activity;GO:0003824//catalytic activity;GO:0043169//cation binding;	K15803//(-)-germacrene D synthase [EC:4.2.3.75]+ko00909//Sesquiterpenoid and triterpenoid biosynthesis
LOC_Os01g17470	0.176	1.123	2.30511	6.82078e-06	GO:0016020//membrane;GO:0031225//anchored component of membrane;GO:0031226//intrinsic component of plasma membrane;GO:0071944//cell periphery;GO:0046658//anchored component of plasma membrane;GO:0031224//intrinsic component of membrane;GO:0005886//plasma membrane;GO:0016491//oxidoreductase activity;GO:0003824//catalytic activity;GO:0009055//electron transfer activity;	K12900//FUS-interacting serine-arginine-rich protein 1+ko03040//Spliceosome;K10990//RecQ-mediated genome instability protein 1;K08360//cytochrome b-561 [EC:7.2.1.3];K00430//peroxidase [EC:1.11.1.7]+ko01100//Metabolic pathways+ko01110//Biosynthesis of secondary metabolites+ko00940//Phenylpropanoid biosynthesis
LOC_Os03g19090	1.353	6.206	2.30358	4.38284e-27		K22020//mucin-19
LOC_Os12g36210	0	0.633	2.2994	0.000561026	GO:0006950//response to stress;GO:0050896//response to stimulus;GO:0009611//response to wounding;GO:0030234//enzyme regulator activity;GO:0061134//peptidase regulator activity;GO:0004857//enzyme inhibitor activity;GO:0030414//peptidase inhibitor activity;GO:0004867//serine-type endopeptidase inhibitor activity;GO:0061135//endopeptidase regulator activity;GO:0004866//endopeptidase inhibitor activi…
LOC_Os11g34570	0.34	2.236	2.29937	1.58415e-05	GO:0030554//adenyl nucleotide binding;GO:0016772//transferase activity, transferring phosphorus-containing groups;GO:0097367//carbohydrate derivative binding;GO:0043168//anion binding;GO:0003824//catalytic activity;GO:0097159//organic cyclic compound binding;GO:1901265//nucleoside phosphate binding;GO:0004672//protein kinase activity;GO:0000166//nucleotide binding;GO:0140096//catalytic activity, …	K13473//chitin elicitor-binding protein+ko04626//Plant-pathogen interaction;K04733//interleukin-1 receptor-associated kinase 4 [EC:2.7.11.1]
LOC_Os10g40710	0.313	1.716	2.29914	4.06843e-08	GO:0071555//cell wall organization;GO:0071840//cellular component organization or biogenesis;GO:0044703//multi-organism reproductive process;GO:0009987//cellular process;GO:0045229//external encapsulating structure organization;GO:0022414//reproductive process;GO:0000003//reproduction;GO:0019953//sexual reproduction;GO:0051704//multi-organism process;GO:0071554//cell wall organization or biogenes…	K20628//expansin
LOC_Os03g10260	0.013	0.343	2.29908	0.00045415		K04733//interleukin-1 receptor-associated kinase 4 [EC:2.7.11.1];K04730//interleukin-1 receptor-associated kinase 1 [EC:2.7.11.1]
LOC_Os03g32940	0.033	0.496	2.29762	0.00043716	GO:0015074//DNA integration;GO:0044237//cellular metabolic process;GO:1901360//organic cyclic compound metabolic process;GO:0006807//nitrogen compound metabolic process;GO:0043170//macromolecule metabolic process;GO:0046483//heterocycle metabolic process;GO:0006259//DNA metabolic process;GO:0071704//organic substance metabolic process;GO:0008152//metabolic process;GO:0006725//cellular aromatic co…	K13171//serine/arginine repetitive matrix protein 1+ko03015//mRNA surveillance pathway+ko03013//RNA transport
LOC_Os01g22640	0.346	1.83	2.2874	5.16738e-08	GO:0016021//integral component of membrane;GO:0031224//intrinsic component of membrane;GO:0016020//membrane;GO:0016788//hydrolase activity, acting on ester bonds;GO:0016787//hydrolase activity;GO:0003824//catalytic activity;	K10396//kinesin family member 5+ko04144//Endocytosis;K01206//alpha-L-fucosidase [EC:3.2.1.51]+ko00511//Other glycan degradation
LOC_Os06g02670	0.136	1.1	2.28297	0.000350601		K04733//interleukin-1 receptor-associated kinase 4 [EC:2.7.11.1]
LOC_Os06g39090	0.023	0.306	2.28213	0.00038079	GO:0070011//peptidase activity, acting on L-amino acid peptides;GO:0003824//catalytic activity;GO:0140096//catalytic activity, acting on a protein;GO:0016787//hydrolase activity;GO:0008233//peptidase activity;GO:0008234//cysteine-type peptidase activity;	K17604//zinc finger SWIM domain-containing protein 3
LOC_Os11g13750	0.21	1.53	2.28004	5.8968e-05		K08360//cytochrome b-561 [EC:7.2.1.3];K04733//interleukin-1 receptor-associated kinase 4 [EC:2.7.11.1]
LOC_Os08g33740	1.266	5.753	2.27835	1.74617e-25	GO:0016020//membrane;GO:0016021//integral component of membrane;GO:0031224//intrinsic component of membrane;	K13680//beta-mannan synthase [EC:2.4.1.32]
LOC_Os01g32460	2.846	13.336	2.27813	1.06048e-14	GO:0032101//regulation of response to external stimulus;GO:0050896//response to stimulus;GO:0002682//regulation of immune system process;GO:0065007//biological regulation;GO:0006950//response to stress;GO:0045088//regulation of innate immune response;GO:0010112//regulation of systemic acquired resistance;GO:0043900//regulation of multi-organism process;GO:0048583//regulation of response to stimul…	K04730//interleukin-1 receptor-associated kinase 1 [EC:2.7.11.1];K04733//interleukin-1 receptor-associated kinase 4 [EC:2.7.11.1]
LOC_Os11g19730	0.06	0.38	2.27258	1.50845e-05
LOC_Os01g68050	0.206	1.073	2.26149	2.23778e-07	GO:0055085//transmembrane transport;GO:0006820//anion transport;GO:0051234//establishment of localization;GO:0006811//ion transport;GO:1903825//organic acid transmembrane transport;GO:0006865//amino acid transport;GO:0034220//ion transmembrane transport;GO:0046942//carboxylic acid transport;GO:0015849//organic acid transport;GO:0071702//organic substance transport;GO:0098656//anion transmembrane …	K14306//nuclear pore complex protein Nup62+ko03013//RNA transport;K01180//endo-1,3(4)-beta-glucanase [EC:3.2.1.6];K04733//interleukin-1 receptor-associated kinase 4 [EC:2.7.11.1];K04733//interleukin-1 receptor-associated kinase 4 [EC:2.7.11.1]
LOC_Os11g46860	0.04	0.396	2.25663	0.000254972	GO:0016021//integral component of membrane;GO:0016020//membrane;GO:0005886//plasma membrane;GO:0031224//intrinsic component of membrane;GO:0071944//cell periphery;GO:0005524//ATP binding;GO:0004674//protein serine/threonine kinase activity;GO:0017076//purine nucleotide binding;GO:1901265//nucleoside phosphate binding;GO:0032553//ribonucleotide binding;GO:0016772//transferase activity, transferrin…	K04733//interleukin-1 receptor-associated kinase 4 [EC:2.7.11.1]
LOC_Os03g10290	0.06	0.453	2.25616	5.13927e-05	GO:0016021//integral component of membrane;GO:0031224//intrinsic component of membrane;GO:0016020//membrane;
LOC_Os02g58370	0.266	1.436	2.25326	2.61516e-07
LOC_Os01g35980	0.3	1.81	2.25267	8.24431e-06		K10955//mucin-2
LOC_Os10g03930	0.54	2.53	2.24582	8.86558e-13
LOC_Os07g07715	2.213	10.183	2.24525	2.20649e-14	GO:0016020//membrane;GO:0016021//integral component of membrane;GO:0031224//intrinsic component of membrane;
LOC_Os12g21940	0.743	3.273	2.23406	1.43009e-22	GO:0016021//integral component of membrane;GO:0031224//intrinsic component of membrane;GO:0016020//membrane;	K00784//ribonuclease Z [EC:3.1.26.11]+ko03013//RNA transport
LOC_Os10g11100	0.136	0.766	2.22956	3.02551e-05
LOC_Os01g70490	0.566	2.546	2.22755	7.40231e-16	GO:0015672//monovalent inorganic cation transport;GO:0006810//transport;GO:0006811//ion transport;GO:0051234//establishment of localization;GO:0030001//metal ion transport;GO:0006813//potassium ion transport;GO:0051179//localization;GO:0006812//cation transport;GO:0031224//intrinsic component of membrane;GO:0016021//integral component of membrane;GO:0016020//membrane;GO:0015318//inorganic molecul…	K03549//KUP system potassium uptake protein
LOC_Os05g10740	1.303	6.213	2.2182	8.01654e-09	GO:0016020//membrane;GO:0031224//intrinsic component of membrane;GO:0016021//integral component of membrane;	K18266//protein NDRG1;K18266//protein NDRG1
LOC_Os01g72300	2.63	11.243	2.21271	1.46831e-29	GO:0005576//extracellular region;GO:0046914//transition metal ion binding;GO:0046872//metal ion binding;GO:0043167//ion binding;GO:0045735//nutrient reservoir activity;GO:0043169//cation binding;GO:0030145//manganese ion binding;GO:0005488//binding;	K13172//serine/arginine repetitive matrix protein 2
LOC_Os11g29840	0	0.196	2.20678	0.00093304	GO:0040008//regulation of growth;GO:0009630//gravitropism;GO:0009629//response to gravity;GO:0065007//biological regulation;GO:0009605//response to external stimulus;GO:0065008//regulation of biological quality;GO:0050789//regulation of biological process;GO:0009628//response to abiotic stimulus;GO:0051049//regulation of transport;GO:0032879//regulation of localization;GO:0050896//response to sti…	K13171//serine/arginine repetitive matrix protein 1+ko03015//mRNA surveillance pathway+ko03013//RNA transport
LOC_Os03g30250	0.213	1.023	2.20357	1.77749e-08	GO:0071669//plant-type cell wall organization or biogenesis;GO:0042546//cell wall biogenesis;GO:0016043//cellular component organization;GO:0071554//cell wall organization or biogenesis;GO:0009832//plant-type cell wall biogenesis;GO:0022607//cellular component assembly;GO:0071840//cellular component organization or biogenesis;GO:0071555//cell wall organization;GO:0045229//external encapsulating s…	K03006//DNA-directed RNA polymerase II subunit RPB1 [EC:2.7.7.6]+ko03020//RNA polymerase;K04733//interleukin-1 receptor-associated kinase 4 [EC:2.7.11.1]
LOC_Os11g11480	0	0.626	2.20202	0.00095692		K10955//mucin-2
LOC_Os05g34560	0.196	2.456	2.18975	0.000650229
LOC_Os12g13640	0.076	0.45	2.18837	2.57154e-05	GO:0016021//integral component of membrane;GO:0016020//membrane;GO:0031224//intrinsic component of membrane;GO:0016757//transferase activity, transferring glycosyl groups;GO:0016740//transferase activity;GO:0003824//catalytic activity;	K18207//protein O-mannose beta-1,4-N-acetylglucosaminyltransferase [EC:2.4.1.312]+ko00515//Mannose type O-glycan biosynthesis+ko01100//Metabolic pathways;K18134//EGF domain-specific O-GlcNAc transferase [EC:2.4.1.255]+ko00514//Other types of O-glycan biosynthesis
LOC_Os10g39680	2.936	12.863	2.18425	1.02401e-14	GO:0005976//polysaccharide metabolic process;GO:1901575//organic substance catabolic process;GO:0046348//amino sugar catabolic process;GO:0006026//aminoglycan catabolic process;GO:0042737//drug catabolic process;GO:0044036//cell wall macromolecule metabolic process;GO:1901136//carbohydrate derivative catabolic process;GO:0071704//organic substance metabolic process;GO:0006030//chitin metabolic pr…	K20547//basic endochitinase B [EC:3.2.1.14]+ko04016//MAPK signaling pathway - plant+ko00520//Amino sugar and nucleotide sugar metabolism+ko01100//Metabolic pathways
LOC_Os04g35020	0.006	0.153	2.18101	0.000934555	GO:0044260//cellular macromolecule metabolic process;GO:0044249//cellular biosynthetic process;GO:0033692//cellular polysaccharide biosynthetic process;GO:0044042//glucan metabolic process;GO:0008152//metabolic process;GO:0016051//carbohydrate biosynthetic process;GO:0000281//mitotic cytokinesis;GO:0044085//cellular component biogenesis;GO:0016043//cellular component organization;GO:0045229//exte…	K10999//cellulose synthase A [EC:2.4.1.12]
LOC_Os09g35630	0.413	1.926	2.17983	1.96312e-08	GO:0005488//binding;GO:0005515//protein binding;GO:0051087//chaperone binding;	K09555//BCL2-associated athanogene 1+ko04141//Protein processing in endoplasmic reticulum;K13172//serine/arginine repetitive matrix protein 2;K22020//mucin-19
LOC_Os11g17540	0.123	0.75	2.17672	0.000132725	GO:0003824//catalytic activity;GO:0016787//hydrolase activity;	K01061//carboxymethylenebutenolidase [EC:3.1.1.45]+ko01100//Metabolic pathways+ko01110//Biosynthesis of secondary metabolites
LOC_Os10g39840	0.336	1.843	2.17496	3.3567e-05	GO:0016043//cellular component organization;GO:0044262//cellular carbohydrate metabolic process;GO:0071704//organic substance metabolic process;GO:0044085//cellular component biogenesis;GO:0071840//cellular component organization or biogenesis;GO:0071554//cell wall organization or biogenesis;GO:0008152//metabolic process;GO:0010410//hemicellulose metabolic process;GO:0044036//cell wall macromolec…	K08235//xyloglucan:xyloglucosyl transferase [EC:2.4.1.207]
LOC_Os06g01250	3.07	12.65	2.17454	1.14919e-41	GO:1901576//organic substance biosynthetic process;GO:0009812//flavonoid metabolic process;GO:0009813//flavonoid biosynthetic process;GO:0009058//biosynthetic process;GO:0071704//organic substance metabolic process;GO:0008152//metabolic process;GO:0016021//integral component of membrane;GO:0031224//intrinsic component of membrane;GO:0016020//membrane;GO:0043169//cation binding;GO:0016705//oxidore…	K23135//flavanone 2-hydroxylase [EC:1.14.14.162]
LOC_Os02g12890	1.96	7.88	2.16898	5.91427e-34	GO:0031224//intrinsic component of membrane;GO:0016021//integral component of membrane;GO:0016020//membrane;GO:0097159//organic cyclic compound binding;GO:0005506//iron ion binding;GO:0003824//catalytic activity;GO:0004497//monooxygenase activity;GO:0043169//cation binding;GO:0016491//oxidoreductase activity;GO:0005488//binding;GO:0046872//metal ion binding;GO:0046906//tetrapyrrole binding;GO:002…	K20771//carlactone C-19 oxidase [EC:1.14.-.-];K20771//carlactone C-19 oxidase [EC:1.14.-.-]
LOC_Os06g40240	0.59	2.436	2.16866	8.92396e-28	GO:0009987//cellular process;GO:0006725//cellular aromatic compound metabolic process;GO:0043170//macromolecule metabolic process;GO:0044238//primary metabolic process;GO:0044260//cellular macromolecule metabolic process;GO:0071704//organic substance metabolic process;GO:0006139//nucleobase-containing compound metabolic process;GO:1901360//organic cyclic compound metabolic process;GO:0006807//nit…	K07393//glutathionyl-hydroquinone reductase [EC:1.8.5.7];K10523//speckle-type POZ protein;K13457//disease resistance protein RPM1+ko04626//Plant-pathogen interaction;K01183//chitinase [EC:3.2.1.14]+ko00520//Amino sugar and nucleotide sugar metabolism+ko01100//Metabolic pathways;K19984//exocyst complex component 5
LOC_Os01g04050	5.333	21.763	2.16711	2.00289e-32	GO:0005576//extracellular region;GO:0061134//peptidase regulator activity;GO:0140096//catalytic activity, acting on a protein;GO:0004867//serine-type endopeptidase inhibitor activity;GO:0030234//enzyme regulator activity;GO:0003824//catalytic activity;GO:0016787//hydrolase activity;GO:0030414//peptidase inhibitor activity;GO:0061135//endopeptidase regulator activity;GO:0004857//enzyme inhibitor a…	K08770//ubiquitin C
LOC_Os06g02780	3.35	14.356	2.16594	2.58781e-14	GO:0044238//primary metabolic process;GO:0019538//protein metabolic process;GO:0008152//metabolic process;GO:1901575//organic substance catabolic process;GO:0030163//protein catabolic process;GO:0006807//nitrogen compound metabolic process;GO:0043170//macromolecule metabolic process;GO:0006508//proteolysis;GO:1901564//organonitrogen compound metabolic process;GO:1901565//organonitrogen compound c…	K01381//saccharopepsin [EC:3.4.23.25]
LOC_Os10g11889	0.656	3.133	2.16361	3.06758e-06
LOC_Os01g71340	6.91	28.15	2.16231	4.64106e-40	GO:0071704//organic substance metabolic process;GO:0008152//metabolic process;GO:0044238//primary metabolic process;GO:0005975//carbohydrate metabolic process;GO:0005886//plasma membrane;GO:0031225//anchored component of membrane;GO:0016020//membrane;GO:0031224//intrinsic component of membrane;GO:0046658//anchored component of plasma membrane;GO:0031226//intrinsic component of plasma membrane;GO:…	K19892//glucan endo-1,3-beta-glucosidase 4 [EC:3.2.1.39]+ko00500//Starch and sucrose metabolism;K19893//glucan endo-1,3-beta-glucosidase 5/6 [EC:3.2.1.39]+ko00500//Starch and sucrose metabolism
LOC_Os04g09900	0.11	0.586	2.16065	3.94661e-06	GO:0008610//lipid biosynthetic process;GO:0009987//cellular process;GO:0065008//regulation of biological quality;GO:0016102//diterpenoid biosynthetic process;GO:0006082//organic acid metabolic process;GO:0008152//metabolic process;GO:0043436//oxoacid metabolic process;GO:0008299//isoprenoid biosynthetic process;GO:0019752//carboxylic acid metabolic process;GO:0006720//isoprenoid metabolic process…	K14043//syn-copalyl-diphosphate synthase [EC:5.5.1.14]+ko00904//Diterpenoid biosynthesis+ko01110//Biosynthesis of secondary metabolites;K04120//ent-copalyl diphosphate synthase [EC:5.5.1.13]+ko00904//Diterpenoid biosynthesis+ko01100//Metabolic pathways+ko01110//Biosynthesis of secondary metabolites;K14043//syn-copalyl-diphosphate synthase [EC:5.5.1.14]+ko00904//Diterpenoid biosynthesis+ko01110//B…
LOC_Os06g07370	0	0.13	2.15762	0.00121098	GO:0005515//protein binding;GO:0005488//binding;GO:0003677//DNA binding;GO:0046983//protein dimerization activity;GO:1901363//heterocyclic compound binding;GO:0003676//nucleic acid binding;GO:0097159//organic cyclic compound binding;	K19984//exocyst complex component 5;K11866//STAM-binding protein [EC:3.4.19.12]+ko04144//Endocytosis;K10398//kinesin family member 11;K04733//interleukin-1 receptor-associated kinase 4 [EC:2.7.11.1];K21437//ankyrin repeat domain-containing protein 13
LOC_Os12g07180	0.24	1.19	2.15731	6.45578e-07		K20368//protein cornichon;K02184//formin 2
LOC_Os09g09960	0	0.076	2.15728	0.00121312	GO:1901360//organic cyclic compound metabolic process;GO:0090304//nucleic acid metabolic process;GO:0015074//DNA integration;GO:0044237//cellular metabolic process;GO:0006807//nitrogen compound metabolic process;GO:0006139//nucleobase-containing compound metabolic process;GO:0044238//primary metabolic process;GO:0009987//cellular process;GO:0008152//metabolic process;GO:0043170//macromolecule met…	K19525//vacuolar protein sorting-associated protein 13A/C;K04125//gibberellin 2beta-dioxygenase [EC:1.14.11.13]+ko00904//Diterpenoid biosynthesis+ko01110//Biosynthesis of secondary metabolites;K02469//DNA gyrase subunit A [EC:5.99.1.3];K02178//checkpoint serine/threonine-protein kinase [EC:2.7.11.1]
LOC_Os05g32110	2	8.176	2.15108	1.13695e-27	GO:0022607//cellular component assembly;GO:0042546//cell wall biogenesis;GO:0030244//cellulose biosynthetic process;GO:0071554//cell wall organization or biogenesis;GO:0009058//biosynthetic process;GO:0033692//cellular polysaccharide biosynthetic process;GO:0071669//plant-type cell wall organization or biogenesis;GO:0000271//polysaccharide biosynthetic process;GO:0043062//extracellular structure …	K17964//leucine-rich PPR motif-containing protein, mitochondrial;K17964//leucine-rich PPR motif-containing protein, mitochondrial;K17964//leucine-rich PPR motif-containing protein, mitochondrial;K17964//leucine-rich PPR motif-containing protein, mitochondrial
LOC_Os11g27264	0	0.15	2.14901	0.00126557	GO:0008152//metabolic process;GO:0019748//secondary metabolic process;GO:0070008//serine-type exopeptidase activity;GO:0004185//serine-type carboxypeptidase activity;GO:0070011//peptidase activity, acting on L-amino acid peptides;GO:0008238//exopeptidase activity;GO:0008236//serine-type peptidase activity;GO:0004180//carboxypeptidase activity;GO:0008233//peptidase activity;GO:0017171//serine hydr…	K16296//serine carboxypeptidase-like clade I [EC:3.4.16.-];K16296//serine carboxypeptidase-like clade I [EC:3.4.16.-]
LOC_Os03g29920	0.22	1.096	2.1465	5.82774e-06	GO:0051234//establishment of localization;GO:0006810//transport;GO:0006812//cation transport;GO:0006811//ion transport;GO:0030001//metal ion transport;GO:0051179//localization;GO:0005488//binding;GO:0043169//cation binding;GO:0046872//metal ion binding;GO:0043167//ion binding;	K22020//mucin-19;K22020//mucin-19
LOC_Os05g50990	0.346	1.59	2.13937	9.17228e-08	GO:0050794//regulation of cellular process;GO:0045454//cell redox homeostasis;GO:0019725//cellular homeostasis;GO:0050789//regulation of biological process;GO:0065007//biological regulation;GO:0009987//cellular process;GO:0042592//homeostatic process;GO:0065008//regulation of biological quality;	K09527//DnaJ homolog subfamily C member 7
LOC_Os01g14660	0.066	0.656	2.13791	0.000732289	GO:0071554//cell wall organization or biogenesis;GO:0045229//external encapsulating structure organization;GO:0016043//cellular component organization;GO:0009664//plant-type cell wall organization;GO:0071840//cellular component organization or biogenesis;GO:0071669//plant-type cell wall organization or biogenesis;GO:0009987//cellular process;GO:0071555//cell wall organization;GO:0005618//cell wal…	K20628//expansin
LOC_Os06g28630	8.95	36.306	2.13699	2.71931e-24	GO:0043229//intracellular organelle;GO:0043226//organelle;GO:0043227//membrane-bounded organelle;GO:0005622//intracellular;GO:0005634//nucleus;GO:0043231//intracellular membrane-bounded organelle;GO:0003676//nucleic acid binding;GO:0005488//binding;GO:1901363//heterocyclic compound binding;GO:0003677//DNA binding;GO:0097159//organic cyclic compound binding;	K15397//3-ketoacyl-CoA synthase [EC:2.3.1.199]+ko01100//Metabolic pathways+ko01110//Biosynthesis of secondary metabolites+ko00062//Fatty acid elongation;K09522//DnaJ homolog subfamily C member 2
LOC_Os07g13790	0.203	1.726	2.13657	0.000538906	GO:0043227//membrane-bounded organelle;GO:0043229//intracellular organelle;GO:0043231//intracellular membrane-bounded organelle;GO:0005622//intracellular;GO:0043226//organelle;GO:0046527//glucosyltransferase activity;GO:0080044//quercetin 7-O-glucosyltransferase activity;GO:0003824//catalytic activity;GO:0016757//transferase activity, transferring glycosyl groups;GO:0080043//quercetin 3-O-glucosy…	K13493//cytokinin-N-glucosyltransferase [EC:2.4.1.-]+ko00908//Zeatin biosynthesis+ko01110//Biosynthesis of secondary metabolites
LOC_Os01g10960	0.01	0.196	2.13384	0.00124648	GO:0043226//organelle;GO:0043227//membrane-bounded organelle;GO:0043229//intracellular organelle;GO:0005737//cytoplasm;GO:0005773//vacuole;GO:0043231//intracellular membrane-bounded organelle;GO:0005622//intracellular;	K01599//uroporphyrinogen decarboxylase [EC:4.1.1.37]+ko00860//Porphyrin and chlorophyll metabolism+ko01100//Metabolic pathways+ko01110//Biosynthesis of secondary metabolites;K13172//serine/arginine repetitive matrix protein 2
LOC_Os06g37926	0	1.396	2.13269	0.00137823	GO:0003676//nucleic acid binding;GO:0043169//cation binding;GO:0097159//organic cyclic compound binding;GO:0008270//zinc ion binding;GO:0043167//ion binding;GO:0046914//transition metal ion binding;GO:0046872//metal ion binding;GO:0005488//binding;GO:1901363//heterocyclic compound binding;
LOC_Os01g67090	0.256	1.153	2.12788	1.73086e-08		K03006//DNA-directed RNA polymerase II subunit RPB1 [EC:2.7.7.6]+ko03020//RNA polymerase;K04733//interleukin-1 receptor-associated kinase 4 [EC:2.7.11.1]
LOC_Os12g35330	0.183	1.763	2.12725	0.000762604	GO:0065008//regulation of biological quality;GO:0050789//regulation of biological process;GO:0065007//biological regulation;GO:0050794//regulation of cellular process;GO:0009987//cellular process;GO:0045454//cell redox homeostasis;GO:0019725//cellular homeostasis;GO:0042592//homeostatic process;GO:0005737//cytoplasm;GO:0005634//nucleus;GO:0043226//organelle;GO:0043231//intracellular membrane-boun…	K03676//glutaredoxin 3
LOC_Os08g28400	1.856	8.16	2.12686	2.33936e-09	GO:0051213//dioxygenase activity;GO:0016702//oxidoreductase activity, acting on single donors with incorporation of molecular oxygen, incorporation of two atoms of oxygen;GO:0016701//oxidoreductase activity, acting on single donors with incorporation of molecular oxygen;GO:0016491//oxidoreductase activity;GO:0003824//catalytic activity;	K11159//carotenoid cleavage dioxygenase
LOC_Os07g45080	0.076	0.71	2.12471	0.000773256	GO:0032501//multicellular organismal process;GO:0007275//multicellular organism development;GO:0010256//endomembrane system organization;GO:0006996//organelle organization;GO:0032502//developmental process;GO:0048731//system development;GO:0009987//cellular process;GO:0061025//membrane fusion;GO:0048856//anatomical structure development;GO:0007568//aging;GO:0007029//endoplasmic reticulum organiza…	K01510//apyrase [EC:3.6.1.5]+ko00230//Purine metabolism+ko00240//Pyrimidine metabolism;K14325//RNA-binding protein with serine-rich domain 1+ko03015//mRNA surveillance pathway+ko03013//RNA transport;K13171//serine/arginine repetitive matrix protein 1+ko03015//mRNA surveillance pathway+ko03013//RNA transport
LOC_Os03g18900	0.156	1.136	2.12377	0.000452035	GO:0031224//intrinsic component of membrane;GO:0016020//membrane;GO:0016021//integral component of membrane;GO:0043167//ion binding;GO:0017076//purine nucleotide binding;GO:0032559//adenyl ribonucleotide binding;GO:0032553//ribonucleotide binding;GO:0043168//anion binding;GO:0035639//purine ribonucleoside triphosphate binding;GO:0005524//ATP binding;GO:1901363//heterocyclic compound binding;GO:00…	K02184//formin 2;K04733//interleukin-1 receptor-associated kinase 4 [EC:2.7.11.1]
LOC_Os05g18030	0	0.253	2.12112	0.00145645	GO:0031224//intrinsic component of membrane;GO:0016021//integral component of membrane;GO:0016020//membrane;GO:0008270//zinc ion binding;GO:0005488//binding;GO:0046914//transition metal ion binding;GO:0043167//ion binding;GO:0003676//nucleic acid binding;GO:0043169//cation binding;GO:1901363//heterocyclic compound binding;GO:0046872//metal ion binding;GO:0097159//organic cyclic compound binding;
LOC_Os04g59540	0.656	2.663	2.11934	1.57915e-18	GO:0044255//cellular lipid metabolic process;GO:0044238//primary metabolic process;GO:0071704//organic substance metabolic process;GO:0009987//cellular process;GO:0046834//lipid phosphorylation;GO:0046488//phosphatidylinositol metabolic process;GO:0046854//phosphatidylinositol phosphorylation;GO:0008152//metabolic process;GO:0006793//phosphorus metabolic process;GO:0030258//lipid modification;GO:…	K00921//1-phosphatidylinositol-3-phosphate 5-kinase [EC:2.7.1.150]+ko04145//Phagosome+ko01100//Metabolic pathways+ko04070//Phosphatidylinositol signaling system+ko00562//Inositol phosphate metabolism
LOC_Os01g04710	0.463	1.976	2.11784	7.93141e-11	GO:0006807//nitrogen compound metabolic process;GO:0008152//metabolic process;GO:0009057//macromolecule catabolic process;GO:1901575//organic substance catabolic process;GO:0006508//proteolysis;GO:0044238//primary metabolic process;GO:1901564//organonitrogen compound metabolic process;GO:0030163//protein catabolic process;GO:0071704//organic substance metabolic process;GO:1901565//organonitrogen …	K22683//aspartyl protease family protein [EC:3.4.23.-]
LOC_Os03g18890	2.236	9.173	2.11396	4.2271e-15	GO:0003824//catalytic activity;GO:0016740//transferase activity;GO:0016757//transferase activity, transferring glycosyl groups;	K20893//probable galacturonosyltransferase-like 1 [EC:2.4.1.-]
LOC_Os05g36990	0.073	0.526	2.11109	0.000452169	GO:0010468//regulation of gene expression;GO:0050789//regulation of biological process;GO:0010558//negative regulation of macromolecule biosynthetic process;GO:0031323//regulation of cellular metabolic process;GO:0050794//regulation of cellular process;GO:0031326//regulation of cellular biosynthetic process;GO:2000112//regulation of cellular macromolecule biosynthetic process;GO:0019219//regulati…	K04733//interleukin-1 receptor-associated kinase 4 [EC:2.7.11.1];K14325//RNA-binding protein with serine-rich domain 1+ko03015//mRNA surveillance pathway+ko03013//RNA transport
LOC_Os07g46930	0.09	0.65	2.10933	0.000446114		K13070//momilactone-A synthase [EC:1.1.1.295]+ko00904//Diterpenoid biosynthesis+ko01110//Biosynthesis of secondary metabolites;K09841//xanthoxin dehydrogenase [EC:1.1.1.288]+ko00906//Carotenoid biosynthesis+ko01100//Metabolic pathways+ko01110//Biosynthesis of secondary metabolites
LOC_Os03g16290	0.066	0.546	2.10046	0.000635236	GO:0016020//membrane;GO:0031224//intrinsic component of membrane;GO:0016021//integral component of membrane;GO:0008375//acetylglucosaminyltransferase activity;GO:0016758//transferase activity, transferring hexosyl groups;GO:0016740//transferase activity;GO:0008194//UDP-glycosyltransferase activity;GO:0003824//catalytic activity;GO:0016757//transferase activity, transferring glycosyl groups;	K14780//ATP-dependent RNA helicase DHX37/DHR1 [EC:3.6.4.13]
LOC_Os04g21130	2.293	9.133	2.1002	7.17751e-23		K03188//urease accessory protein;K04733//interleukin-1 receptor-associated kinase 4 [EC:2.7.11.1]
LOC_Os04g05050	0.086	0.57	2.09735	0.00025869	GO:0005976//polysaccharide metabolic process;GO:0044237//cellular metabolic process;GO:0009987//cellular process;GO:0071704//organic substance metabolic process;GO:0043170//macromolecule metabolic process;GO:0000272//polysaccharide catabolic process;GO:0044238//primary metabolic process;GO:0045488//pectin metabolic process;GO:0008152//metabolic process;GO:0044248//cellular catabolic process;GO:00…	K01728//pectate lyase [EC:4.2.2.2]+ko00040//Pentose and glucuronate interconversions;K01728//pectate lyase [EC:4.2.2.2]+ko00040//Pentose and glucuronate interconversions
LOC_Os04g23550	0.3	1.39	2.09154	7.72546e-07	GO:0005515//protein binding;GO:0005488//binding;GO:0046983//protein dimerization activity;	K13422//transcription factor MYC2+ko04016//MAPK signaling pathway - plant+ko04075//Plant hormone signal transduction;K18486//heart-and neural crest derivatives-expressed protein 2;K16190//glucuronokinase [EC:2.7.1.43]+ko00520//Amino sugar and nucleotide sugar metabolism+ko00040//Pentose and glucuronate interconversions+ko01100//Metabolic pathways+ko00053//Ascorbate and aldarate metabolism;K04733/…
LOC_Os10g12050	0.493	2.146	2.09099	1.82985e-09	GO:1901576//organic substance biosynthetic process;GO:0009698//phenylpropanoid metabolic process;GO:1901362//organic cyclic compound biosynthetic process;GO:0006725//cellular aromatic compound metabolic process;GO:0044237//cellular metabolic process;GO:0009808//lignin metabolic process;GO:0008152//metabolic process;GO:0009809//lignin biosynthetic process;GO:0019438//aromatic compound biosynthetic…	K09754//5-O-(4-coumaroyl)-D-quinate 3'-monooxygenase [EC:1.14.14.96]+ko01100//Metabolic pathways+ko01110//Biosynthesis of secondary metabolites+ko00940//Phenylpropanoid biosynthesis+ko00941//Flavonoid biosynthesis+ko00945//Stilbenoid, diarylheptanoid and gingerol biosynthesis;K09754//5-O-(4-coumaroyl)-D-quinate 3'-monooxygenase [EC:1.14.14.96]+ko01100//Metabolic pathways+ko01110//Biosynthesis of …
LOC_Os01g57370	0.02	0.24	2.09046	0.00139785	GO:0016021//integral component of membrane;GO:0016020//membrane;GO:0031224//intrinsic component of membrane;GO:0005215//transporter activity;GO:0022857//transmembrane transporter activity;GO:0015267//channel activity;GO:0015075//ion transmembrane transporter activity;GO:0022803//passive transmembrane transporter activity;GO:0015318//inorganic molecular entity transmembrane transporter activity;GO…	K05391//cyclic nucleotide gated channel, plant+ko04626//Plant-pathogen interaction
LOC_Os03g02190	0.04	0.32	2.08735	0.000653954	GO:1901564//organonitrogen compound metabolic process;GO:0071704//organic substance metabolic process;GO:0009987//cellular process;GO:0044260//cellular macromolecule metabolic process;GO:0006468//protein phosphorylation;GO:0006464//cellular protein modification process;GO:0006796//phosphate-containing compound metabolic process;GO:0006793//phosphorus metabolic process;GO:0036211//protein modifica…	K04733//interleukin-1 receptor-associated kinase 4 [EC:2.7.11.1]
LOC_Os07g48050	0	0.196	2.08731	0.00173749	GO:0072593//reactive oxygen species metabolic process;GO:0044248//cellular catabolic process;GO:0008152//metabolic process;GO:0009987//cellular process;GO:0009056//catabolic process;GO:0017144//drug metabolic process;GO:0042744//hydrogen peroxide catabolic process;GO:0044237//cellular metabolic process;GO:0042737//drug catabolic process;GO:0006950//response to stress;GO:0042743//hydrogen peroxide…	K00430//peroxidase [EC:1.11.1.7]+ko01100//Metabolic pathways+ko01110//Biosynthesis of secondary metabolites+ko00940//Phenylpropanoid biosynthesis
LOC_Os04g36070	1.093	4.256	2.08431	6.48153e-21	GO:0050789//regulation of biological process;GO:0071310//cellular response to organic substance;GO:0032502//developmental process;GO:0070887//cellular response to chemical stimulus;GO:0032870//cellular response to hormone stimulus;GO:0048364//root development;GO:0009719//response to endogenous stimulus;GO:0007275//multicellular organism development;GO:0032501//multicellular organismal process;GO:…	K14492//two-component response regulator ARR-A family+ko04075//Plant hormone signal transduction
LOC_Os10g25140	0.05	0.37	2.0828	0.00067916	GO:0008152//metabolic process;GO:0009058//biosynthetic process;GO:0005488//binding;GO:0019842//vitamin binding;GO:0030170//pyridoxal phosphate binding;GO:1901363//heterocyclic compound binding;GO:0036094//small molecule binding;GO:0008144//drug binding;GO:0043168//anion binding;GO:0043167//ion binding;GO:0070279//vitamin B6 binding;GO:0097159//organic cyclic compound binding;GO:0003824//catalytic…	K00814//alanine transaminase [EC:2.6.1.2]+ko00250//Alanine, aspartate and glutamate metabolism+ko00220//Arginine biosynthesis+ko01230//Biosynthesis of amino acids+ko01100//Metabolic pathways+ko00710//Carbon fixation in photosynthetic organisms+ko01210//2-Oxocarboxylic acid metabolism+ko01200//Carbon metabolism
LOC_Os02g21890	0.196	1.07	2.08081	8.68051e-05	GO:0048869//cellular developmental process;GO:0032501//multicellular organismal process;GO:0007275//multicellular organism development;GO:0009987//cellular process;GO:0048856//anatomical structure development;GO:0030154//cell differentiation;GO:0032502//developmental process;GO:0005576//extracellular region;
LOC_Os04g48380	0.803	3.43	2.0788	6.51508e-09	GO:0031224//intrinsic component of membrane;GO:0016021//integral component of membrane;GO:0016020//membrane;	K03363//cell division cycle 20, cofactor of APC complex+ko04120//Ubiquitin mediated proteolysis
LOC_Os10g40620	0.14	0.683	2.07787	1.02613e-05	GO:0070925//organelle assembly;GO:0007049//cell cycle;GO:0007017//microtubule-based process;GO:0009987//cellular process;GO:0044085//cellular component biogenesis;GO:0007051//spindle organization;GO:0007098//centrosome cycle;GO:0031023//microtubule organizing center organization;GO:0006996//organelle organization;GO:0016043//cellular component organization;GO:0007010//cytoskeleton organization;GO…	K22020//mucin-19
LOC_Os06g11660	5.11	21.256	2.07658	4.15248e-21	GO:0031224//intrinsic component of membrane;GO:0016020//membrane;GO:0016021//integral component of membrane;	K00020//3-hydroxyisobutyrate dehydrogenase [EC:1.1.1.31]+ko00280//Valine, leucine and isoleucine degradation+ko01100//Metabolic pathways;K21952//CASK-interacting protein;K00020//3-hydroxyisobutyrate dehydrogenase [EC:1.1.1.31]+ko00280//Valine, leucine and isoleucine degradation+ko01100//Metabolic pathways;K14299//nucleoporin SEH1+ko03013//RNA transport;K13171//serine/arginine repetitive matrix pr…
LOC_Os02g06360	0.36	1.6	2.07592	4.13823e-07	GO:0071704//organic substance metabolic process;GO:0044238//primary metabolic process;GO:0008152//metabolic process;GO:1901135//carbohydrate derivative metabolic process;GO:0005975//carbohydrate metabolic process;GO:0003824//catalytic activity;GO:0097367//carbohydrate derivative binding;GO:0005488//binding;GO:0016853//isomerase activity;	K06041//arabinose-5-phosphate isomerase [EC:5.3.1.13]+ko01100//Metabolic pathways
LOC_Os12g01370	1.563	6.196	2.07435	5.08647e-15	GO:0006629//lipid metabolic process;GO:0071704//organic substance metabolic process;GO:0044238//primary metabolic process;GO:0008152//metabolic process;GO:0016021//integral component of membrane;GO:0016020//membrane;GO:0031224//intrinsic component of membrane;GO:0016705//oxidoreductase activity, acting on paired donors, with incorporation or reduction of molecular oxygen;GO:0003824//catalytic act…	K10257//acyl-lipid omega-3 desaturase [EC:1.14.19.25 1.14.19.35 1.14.19.36]
LOC_Os04g37500	0.276	1.113	2.07386	2.4274e-08	GO:0044237//cellular metabolic process;GO:0043648//dicarboxylic acid metabolic process;GO:0019752//carboxylic acid metabolic process;GO:0009987//cellular process;GO:0071704//organic substance metabolic process;GO:0006520//cellular amino acid metabolic process;GO:0006082//organic acid metabolic process;GO:0008152//metabolic process;GO:0006807//nitrogen compound metabolic process;GO:0043436//oxoaci…	K01580//glutamate decarboxylase [EC:4.1.1.15]+ko00410//beta-Alanine metabolism+ko00250//Alanine, aspartate and glutamate metabolism+ko00430//Taurine and hypotaurine metabolism+ko01100//Metabolic pathways+ko00650//Butanoate metabolism+ko01110//Biosynthesis of secondary metabolites
LOC_Os09g30486	0	0.2	2.07315	0.00186428	GO:0009834//plant-type secondary cell wall biogenesis;GO:0071669//plant-type cell wall organization or biogenesis;GO:0009987//cellular process;GO:0009832//plant-type cell wall biogenesis;GO:0044085//cellular component biogenesis;GO:0042546//cell wall biogenesis;GO:0071840//cellular component organization or biogenesis;GO:0071554//cell wall organization or biogenesis;GO:0031224//intrinsic componen…	K13171//serine/arginine repetitive matrix protein 1+ko03015//mRNA surveillance pathway+ko03013//RNA transport;K13172//serine/arginine repetitive matrix protein 2
LOC_Os08g06190	0	0.15	2.07314	0.00186438	GO:0036094//small molecule binding;GO:0000166//nucleotide binding;GO:0016491//oxidoreductase activity;GO:0097159//organic cyclic compound binding;GO:0003824//catalytic activity;GO:1901265//nucleoside phosphate binding;GO:0071949//FAD binding;GO:1901363//heterocyclic compound binding;GO:0050660//flavin adenine dinucleotide binding;GO:0005488//binding;GO:0043168//anion binding;GO:0043167//ion bindi…	K22395//cinnamyl-alcohol dehydrogenase [EC:1.1.1.195]+ko01100//Metabolic pathways+ko01110//Biosynthesis of secondary metabolites+ko00940//Phenylpropanoid biosynthesis
LOC_Os12g05210	0.17	0.96	2.0646	0.000147226	GO:0065007//biological regulation;GO:0009892//negative regulation of metabolic process;GO:0010605//negative regulation of macromolecule metabolic process;GO:0010556//regulation of macromolecule biosynthetic process;GO:1903506//regulation of nucleic acid-templated transcription;GO:0019219//regulation of nucleobase-containing compound metabolic process;GO:0051172//negative regulation of nitrogen co…	K11498//centromeric protein E
LOC_Os01g72370	0.086	0.43	2.0641	0.000220581	GO:1900376//regulation of secondary metabolite biosynthetic process;GO:1900378//positive regulation of secondary metabolite biosynthetic process;GO:0051252//regulation of RNA metabolic process;GO:0050896//response to stimulus;GO:0010033//response to organic substance;GO:0065007//biological regulation;GO:0009966//regulation of signal transduction;GO:0019219//regulation of nucleobase-containing com…	K18486//heart-and neural crest derivatives-expressed protein 2;K17987//next to BRCA1 gene 1 protein;K18486//heart-and neural crest derivatives-expressed protein 2;K20558//transcription factor SPEECHLESS+ko04016//MAPK signaling pathway - plant;K18486//heart-and neural crest derivatives-expressed protein 2;K17987//next to BRCA1 gene 1 protein
LOC_Os01g54300	0.13	0.6	2.06191	2.23912e-05	GO:0044275//cellular carbohydrate catabolic process;GO:0071554//cell wall organization or biogenesis;GO:0000272//polysaccharide catabolic process;GO:0005976//polysaccharide metabolic process;GO:0009056//catabolic process;GO:0044036//cell wall macromolecule metabolic process;GO:0044264//cellular polysaccharide metabolic process;GO:0044237//cellular metabolic process;GO:0044260//cellular macromolec…	K19355//mannan endo-1,4-beta-mannosidase [EC:3.2.1.78]+ko00051//Fructose and mannose metabolism
LOC_Os08g07100	0.01	0.213	2.04609	0.00204259	GO:0010333//terpene synthase activity;GO:0016838//carbon-oxygen lyase activity, acting on phosphates;GO:0043167//ion binding;GO:0016829//lyase activity;GO:0003824//catalytic activity;GO:0005488//binding;GO:0016835//carbon-oxygen lyase activity;GO:0046872//metal ion binding;GO:0000287//magnesium ion binding;GO:0043169//cation binding;	K22061//beta-sesquiphellandrene synthase [EC:4.2.3.123]
LOC_Os08g36630	0.146	0.82	2.0459	0.000165771	GO:0004089//carbonate dehydratase activity;GO:0005488//binding;GO:0016836//hydro-lyase activity;GO:0016829//lyase activity;GO:0003824//catalytic activity;GO:0043169//cation binding;GO:0046914//transition metal ion binding;GO:0016835//carbon-oxygen lyase activity;GO:0008270//zinc ion binding;GO:0043167//ion binding;GO:0046872//metal ion binding;	K01674//carbonic anhydrase [EC:4.2.1.1]+ko00910//Nitrogen metabolism
LOC_Os01g63190	12.19	45.296	2.04443	2.05511e-68	GO:0046274//lignin catabolic process;GO:1901360//organic cyclic compound metabolic process;GO:1901575//organic substance catabolic process;GO:0009808//lignin metabolic process;GO:0019439//aromatic compound catabolic process;GO:0044237//cellular metabolic process;GO:0006725//cellular aromatic compound metabolic process;GO:0071704//organic substance metabolic process;GO:0009056//catabolic process;G…	K05909//laccase [EC:1.10.3.2];K05909//laccase [EC:1.10.3.2]
LOC_Os11g02220	0	0.42	2.04295	0.00215446
LOC_Os10g13850	3.563	15.303	2.03996	8.2145e-07		K02184//formin 2
LOC_Os01g36720	1.666	6.483	2.03956	8.93188e-16	GO:0042221//response to chemical;GO:0071705//nitrogen compound transport;GO:0010167//response to nitrate;GO:0050896//response to stimulus;GO:0051179//localization;GO:0043436//oxoacid metabolic process;GO:0010035//response to inorganic substance;GO:0006810//transport;GO:0015698//inorganic anion transport;GO:0051234//establishment of localization;GO:0070887//cellular response to chemical stimulus;G…	K02575//MFS transporter, NNP family, nitrate/nitrite transporter+ko00910//Nitrogen metabolism
LOC_Os06g22980	0.036	0.213	2.03928	0.00027188	GO:0016051//carbohydrate biosynthetic process;GO:0009832//plant-type cell wall biogenesis;GO:0043170//macromolecule metabolic process;GO:0009833//plant-type primary cell wall biogenesis;GO:0071555//cell wall organization;GO:0009059//macromolecule biosynthetic process;GO:0051301//cell division;GO:0044249//cellular biosynthetic process;GO:0009856//pollination;GO:0044085//cellular component biogenes…	K20924//cellulose synthase-like protein [EC:2.4.1.-]
LOC_Os02g24760	0	0.443	2.03913	0.00220124	GO:0003676//nucleic acid binding;GO:1901363//heterocyclic compound binding;GO:0005515//protein binding;GO:0046983//protein dimerization activity;GO:0003677//DNA binding;GO:0005488//binding;GO:0097159//organic cyclic compound binding;	K10398//kinesin family member 11;K21437//ankyrin repeat domain-containing protein 13;K11866//STAM-binding protein [EC:3.4.19.12]+ko04144//Endocytosis;K04733//interleukin-1 receptor-associated kinase 4 [EC:2.7.11.1];K15731//carboxy-terminal domain RNA polymerase II polypeptide A small phosphatase [EC:3.1.3.16]
LOC_Os08g37680	0	1.513	2.0333	0.00221261	GO:0016021//integral component of membrane;GO:0016020//membrane;GO:0031224//intrinsic component of membrane;
LOC_Os06g37150	0.37	1.473	2.03139	2.01218e-10	GO:0030312//external encapsulating structure;GO:0005911//cell-cell junction;GO:0009506//plasmodesma;GO:0005576//extracellular region;GO:0030054//cell junction;GO:0009505//plant-type cell wall;GO:0005618//cell wall;GO:0071944//cell periphery;GO:0055044//symplast;GO:0046872//metal ion binding;GO:0005507//copper ion binding;GO:0005488//binding;GO:0043169//cation binding;GO:0043167//ion binding;GO:00…	K00423//L-ascorbate oxidase [EC:1.10.3.3]+ko01100//Metabolic pathways+ko00053//Ascorbate and aldarate metabolism
LOC_Os07g38470	0.28	2.703	2.02805	0.00160194
LOC_Os12g43430	12.11	62.133	2.02729	0.000148945	GO:0005576//extracellular region;	K04733//interleukin-1 receptor-associated kinase 4 [EC:2.7.11.1]
LOC_Os03g08550	1.066	4.136	2.02364	9.67203e-12	GO:0071704//organic substance metabolic process;GO:1901564//organonitrogen compound metabolic process;GO:0044267//cellular protein metabolic process;GO:0044260//cellular macromolecule metabolic process;GO:0043412//macromolecule modification;GO:0008152//metabolic process;GO:0006807//nitrogen compound metabolic process;GO:0006464//cellular protein modification process;GO:0006796//phosphate-containi…	K04733//interleukin-1 receptor-associated kinase 4 [EC:2.7.11.1];K04733//interleukin-1 receptor-associated kinase 4 [EC:2.7.11.1]
LOC_Os11g35620	0	0.346	2.02113	0.00237268
LOC_Os06g39120	16.89	65.506	2.01556	4.63593e-11
LOC_Os09g20880	0.203	0.856	2.01511	7.09794e-07	GO:0004672//protein kinase activity;GO:0008144//drug binding;GO:0036094//small molecule binding;GO:0032553//ribonucleotide binding;GO:1901265//nucleoside phosphate binding;GO:0097367//carbohydrate derivative binding;GO:0043168//anion binding;GO:0004674//protein serine/threonine kinase activity;GO:0032559//adenyl ribonucleotide binding;GO:0016301//kinase activity;GO:0030554//adenyl nucleotide bind…	K04733//interleukin-1 receptor-associated kinase 4 [EC:2.7.11.1];K04733//interleukin-1 receptor-associated kinase 4 [EC:2.7.11.1]
LOC_Os07g43990	0.483	1.976	2.01231	1.2075e-07	GO:0016021//integral component of membrane;GO:0042175//nuclear outer membrane-endoplasmic reticulum membrane network;GO:0043226//organelle;GO:0005737//cytoplasm;GO:0016020//membrane;GO:0031224//intrinsic component of membrane;GO:0043227//membrane-bounded organelle;GO:0043231//intracellular membrane-bounded organelle;GO:0005622//intracellular;GO:0005794//Golgi apparatus;GO:0012505//endomembrane sy…	K21952//CASK-interacting protein
LOC_Os09g36840	0.13	1.236	2.00995	0.00239334	GO:0051276//chromosome organization;GO:0071840//cellular component organization or biogenesis;GO:0034622//cellular protein-containing complex assembly;GO:0065004//protein-DNA complex assembly;GO:0006996//organelle organization;GO:0034508//centromere complex assembly;GO:0009987//cellular process;GO:0043933//protein-containing complex subunit organization;GO:0016043//cellular component organization…	K12662//U4/U6 small nuclear ribonucleoprotein PRP4+ko03040//Spliceosome
LOC_Os05g45180	0.073	0.456	2.00835	0.00121516	GO:0043229//intracellular organelle;GO:0043231//intracellular membrane-bounded organelle;GO:0043226//organelle;GO:0043227//membrane-bounded organelle;GO:0005622//intracellular;GO:0003824//catalytic activity;GO:0008194//UDP-glycosyltransferase activity;GO:0016757//transferase activity, transferring glycosyl groups;GO:0016740//transferase activity;GO:0016758//transferase activity, transferring hexo…	K22845//phlorizin synthase [EC:2.4.1.357]+ko01110//Biosynthesis of secondary metabolites+ko00941//Flavonoid biosynthesis
LOC_Os11g10490	0	0.106	2.00377	0.0026167		K13528//mediator of RNA polymerase II transcription subunit 20;K02218//casein kinase 1 [EC:2.7.11.1];K05291//phosphatidylinositol glycan, class S+ko01100//Metabolic pathways+ko00563//Glycosylphosphatidylinositol (GPI)-anchor biosynthesis;K13484//5-hydroxyisourate hydrolase / 2-oxo-4-hydroxy-4-carboxy-5-ureidoimidazoline decarboxylase [EC:3.5.2.17 4.1.1.97]+ko00230//Purine metabolism+ko01100//Meta…
LOC_Os07g05940	0.056	0.326	1.99174	0.000558643	GO:1901617//organic hydroxy compound biosynthetic process;GO:0044283//small molecule biosynthetic process;GO:0042214//terpene metabolic process;GO:0016114//terpenoid biosynthetic process;GO:0016042//lipid catabolic process;GO:0016106//sesquiterpenoid biosynthetic process;GO:1901615//organic hydroxy compound metabolic process;GO:0071704//organic substance metabolic process;GO:0043289//apocarotenoi…	K09840//9-cis-epoxycarotenoid dioxygenase [EC:1.13.11.51]+ko00906//Carotenoid biosynthesis+ko01100//Metabolic pathways+ko01110//Biosynthesis of secondary metabolites
LOC_Os05g40600	0.043	0.45	1.99098	0.00252945	GO:0043169//cation binding;GO:0046914//transition metal ion binding;GO:1901363//heterocyclic compound binding;GO:0043167//ion binding;GO:0097159//organic cyclic compound binding;GO:0008270//zinc ion binding;GO:0046872//metal ion binding;GO:0005488//binding;GO:0003676//nucleic acid binding;	K17604//zinc finger SWIM domain-containing protein 3
LOC_Os08g29900	0.036	0.983	1.99014	0.00283493	GO:0044281//small molecule metabolic process;GO:0009058//biosynthetic process;GO:0044255//cellular lipid metabolic process;GO:0008152//metabolic process;GO:0006629//lipid metabolic process;GO:0071704//organic substance metabolic process;GO:0006744//ubiquinone biosynthetic process;GO:0008610//lipid biosynthetic process;GO:0009987//cellular process;GO:1901576//organic substance biosynthetic process…	K06125//4-hydroxybenzoate polyprenyltransferase [EC:2.5.1.39]+ko00130//Ubiquinone and other terpenoid-quinone biosynthesis+ko01100//Metabolic pathways+ko01110//Biosynthesis of secondary metabolites
LOC_Os03g54750	0.36	1.556	1.98895	2.98661e-05	GO:0044042//glucan metabolic process;GO:0052541//plant-type cell wall cellulose metabolic process;GO:0044238//primary metabolic process;GO:0044038//cell wall macromolecule biosynthetic process;GO:0044036//cell wall macromolecule metabolic process;GO:0033692//cellular polysaccharide biosynthetic process;GO:0042546//cell wall biogenesis;GO:0009664//plant-type cell wall organization;GO:0034645//cell…
LOC_Os12g03230	0.14	0.67	1.98723	0.000525752	GO:0006810//transport;GO:0015893//drug transport;GO:0042493//response to drug;GO:0055085//transmembrane transport;GO:0050896//response to stimulus;GO:0051179//localization;GO:0006855//drug transmembrane transport;GO:0042221//response to chemical;GO:0051234//establishment of localization;GO:0016020//membrane;GO:0031224//intrinsic component of membrane;GO:0016021//integral component of membrane;GO:…	K03327//multidrug resistance protein, MATE family
LOC_Os02g58380	0.133	0.973	1.97965	0.00151277	GO:0009987//cellular process;GO:0010256//endomembrane system organization;GO:0071786//endoplasmic reticulum tubular network organization;GO:0016043//cellular component organization;GO:0006996//organelle organization;GO:0007029//endoplasmic reticulum organization;GO:0071840//cellular component organization or biogenesis;GO:0016020//membrane;GO:0043229//intracellular organelle;GO:0098827//endoplasm…
LOC_Os11g22960	0.013	0.283	1.97664	0.00294184		K15174//RNA polymerase II-associated factor 1;K04733//interleukin-1 receptor-associated kinase 4 [EC:2.7.11.1];K02184//formin 2
LOC_Os03g25500	43.84	154.98	1.97647	9.46204e-74	GO:1901363//heterocyclic compound binding;GO:0005488//binding;GO:0004497//monooxygenase activity;GO:0043169//cation binding;GO:0046906//tetrapyrrole binding;GO:0097159//organic cyclic compound binding;GO:0046914//transition metal ion binding;GO:0020037//heme binding;GO:0016705//oxidoreductase activity, acting on paired donors, with incorporation or reduction of molecular oxygen;GO:0046872//metal …	K20660//cytochrome P450 family 709
LOC_Os01g11350	0.033	0.326	1.97438	0.00221259	GO:2000112//regulation of cellular macromolecule biosynthetic process;GO:1903506//regulation of nucleic acid-templated transcription;GO:0019222//regulation of metabolic process;GO:0010556//regulation of macromolecule biosynthetic process;GO:0050794//regulation of cellular process;GO:0031328//positive regulation of cellular biosynthetic process;GO:0010604//positive regulation of macromolecule meta…	K04374//cyclic AMP-dependent transcription factor ATF-4+ko04141//Protein processing in endoplasmic reticulum;K20557//transcription factor VIP1+ko04016//MAPK signaling pathway - plant
LOC_Os03g26930	1.566	5.683	1.97277	3.1314e-20	GO:0044265//cellular macromolecule catabolic process;GO:0009056//catabolic process;GO:0008152//metabolic process;GO:1901564//organonitrogen compound metabolic process;GO:1901575//organic substance catabolic process;GO:0071704//organic substance metabolic process;GO:0044237//cellular metabolic process;GO:0009987//cellular process;GO:0044267//cellular protein metabolic process;GO:0006508//proteolys…	K16297//serine carboxypeptidase-like clade II [EC:3.4.16.-]
LOC_Os04g53800	0.026	0.28	1.97067	0.00245773	GO:0016616//oxidoreductase activity, acting on the CH-OH group of donors, NAD or NADP as acceptor;GO:0003824//catalytic activity;GO:0016491//oxidoreductase activity;GO:0005488//binding;GO:0016614//oxidoreductase activity, acting on CH-OH group of donors;	K08695//anthocyanidin reductase [EC:1.3.1.77]+ko01110//Biosynthesis of secondary metabolites+ko00941//Flavonoid biosynthesis
LOC_Os04g59330	1.813	6.533	1.96094	3.2045e-20	GO:0031224//intrinsic component of membrane;GO:0016021//integral component of membrane;GO:0016020//membrane;	K19042//E3 ubiquitin-protein ligase BOI and related proteins [EC:2.3.2.27];K13172//serine/arginine repetitive matrix protein 2
LOC_Os10g02840	0.093	0.543	1.95835	0.000772409	GO:0046483//heterocycle metabolic process;GO:0044237//cellular metabolic process;GO:1901362//organic cyclic compound biosynthetic process;GO:0042430//indole-containing compound metabolic process;GO:0017144//drug metabolic process;GO:0043603//cellular amide metabolic process;GO:0065007//biological regulation;GO:0044249//cellular biosynthetic process;GO:0034641//cellular nitrogen compound metabolic…	K22588//acetylserotonin O-methyltransferase, plant [EC:2.1.1.4]+ko00380//Tryptophan metabolism+ko01100//Metabolic pathways
LOC_Os03g51980	0.07	0.553	1.95609	0.00208715	GO:0006725//cellular aromatic compound metabolic process;GO:0006139//nucleobase-containing compound metabolic process;GO:0034470//ncRNA processing;GO:0006396//RNA processing;GO:0046483//heterocycle metabolic process;GO:0071840//cellular component organization or biogenesis;GO:1901360//organic cyclic compound metabolic process;GO:0010467//gene expression;GO:0044085//cellular component biogenesis;G…	K14325//RNA-binding protein with serine-rich domain 1+ko03015//mRNA surveillance pathway+ko03013//RNA transport;K13171//serine/arginine repetitive matrix protein 1+ko03015//mRNA surveillance pathway+ko03013//RNA transport
LOC_Os07g13160	0.126	0.71	1.95262	0.00141614	GO:0016021//integral component of membrane;GO:0016020//membrane;GO:0031224//intrinsic component of membrane;
LOC_Os03g12680	0.106	0.546	1.94653	0.000597087	GO:0071704//organic substance metabolic process;GO:0008152//metabolic process;GO:0006807//nitrogen compound metabolic process;GO:0043412//macromolecule modification;GO:1901564//organonitrogen compound metabolic process;GO:0006468//protein phosphorylation;GO:0016310//phosphorylation;GO:0006464//cellular protein modification process;GO:0044238//primary metabolic process;GO:0043170//macromolecule me…	K04733//interleukin-1 receptor-associated kinase 4 [EC:2.7.11.1];K04733//interleukin-1 receptor-associated kinase 4 [EC:2.7.11.1]
LOC_Os02g56930	0.07	0.576	1.94609	0.00233899	GO:0005488//binding;GO:0016491//oxidoreductase activity;GO:0097159//organic cyclic compound binding;GO:0043169//cation binding;GO:1901363//heterocyclic compound binding;GO:0046872//metal ion binding;GO:0009055//electron transfer activity;GO:0020037//heme binding;GO:0003824//catalytic activity;GO:0046906//tetrapyrrole binding;GO:0043167//ion binding;	K14325//RNA-binding protein with serine-rich domain 1+ko03015//mRNA surveillance pathway+ko03013//RNA transport
LOC_Os01g62950	0.503	2.09	1.94348	1.18976e-05	GO:0000166//nucleotide binding;GO:0016817//hydrolase activity, acting on acid anhydrides;GO:0032549//ribonucleoside binding;GO:0003924//GTPase activity;GO:0001883//purine nucleoside binding;GO:0017076//purine nucleotide binding;GO:0043167//ion binding;GO:0016462//pyrophosphatase activity;GO:1901363//heterocyclic compound binding;GO:0005525//GTP binding;GO:0043168//anion binding;GO:0016818//hydrol…	K07904//Ras-related protein Rab-11A+ko04144//Endocytosis;K07976//Rab family, other
LOC_Os10g34790	0.29	1.21	1.94195	8.2925e-06	GO:0046872//metal ion binding;GO:0010333//terpene synthase activity;GO:0003824//catalytic activity;GO:0043167//ion binding;GO:0005488//binding;GO:0016835//carbon-oxygen lyase activity;GO:0000287//magnesium ion binding;GO:0016838//carbon-oxygen lyase activity, acting on phosphates;GO:0016829//lyase activity;GO:0043169//cation binding;	K15086//(3S)-linalool synthase [EC:4.2.3.25]+ko00902//Monoterpenoid biosynthesis+ko01110//Biosynthesis of secondary metabolites
LOC_Os08g43270	0.39	1.51	1.94188	8.26054e-08	GO:0005515//protein binding;GO:0005488//binding;GO:0051087//chaperone binding;	K09555//BCL2-associated athanogene 1+ko04141//Protein processing in endoplasmic reticulum;K13172//serine/arginine repetitive matrix protein 2
LOC_Os10g21268	65.323	228.36	1.94058	1.91467e-33	GO:0008152//metabolic process;GO:0019685//photosynthesis, dark reaction;GO:0043094//cellular metabolic compound salvage;GO:0005975//carbohydrate metabolic process;GO:0016051//carbohydrate biosynthetic process;GO:0071704//organic substance metabolic process;GO:0044238//primary metabolic process;GO:0009853//photorespiration;GO:0009987//cellular process;GO:0015979//photosynthesis;GO:1901576//organic…	K01601//ribulose-bisphosphate carboxylase large chain [EC:4.1.1.39]+ko01100//Metabolic pathways+ko00710//Carbon fixation in photosynthetic organisms+ko01200//Carbon metabolism+ko00630//Glyoxylate and dicarboxylate metabolism
LOC_Os09g25810	2.06	7.283	1.93989	1.54211e-21	GO:0031224//intrinsic component of membrane;GO:0005886//plasma membrane;GO:0071944//cell periphery;GO:0016020//membrane;GO:0016021//integral component of membrane;GO:0022857//transmembrane transporter activity;GO:0005215//transporter activity;	K17500//integrin-linked kinase-associated serine/threonine phosphatase 2C [EC:3.1.3.16]
LOC_Os06g04920	11.873	40.893	1.9358	8.78049e-58	GO:0046872//metal ion binding;GO:0043169//cation binding;GO:0005488//binding;GO:0043167//ion binding;GO:0016787//hydrolase activity;GO:0003824//catalytic activity;	K15407//queuine tRNA-ribosyltransferase subunit QTRTD1 [EC:2.4.2.29];K14651//transcription initiation factor TFIID subunit 15+ko03022//Basal transcription factors;K14651//transcription initiation factor TFIID subunit 15+ko03022//Basal transcription factors;K15407//queuine tRNA-ribosyltransferase subunit QTRTD1 [EC:2.4.2.29]
LOC_Os09g32080	1.41	5.233	1.93535	1.26858e-09	GO:0042737//drug catabolic process;GO:0006026//aminoglycan catabolic process;GO:0043170//macromolecule metabolic process;GO:1901136//carbohydrate derivative catabolic process;GO:0044237//cellular metabolic process;GO:0006032//chitin catabolic process;GO:0006040//amino sugar metabolic process;GO:1901071//glucosamine-containing compound metabolic process;GO:0009057//macromolecule catabolic process;…	K20547//basic endochitinase B [EC:3.2.1.14]+ko04016//MAPK signaling pathway - plant+ko00520//Amino sugar and nucleotide sugar metabolism+ko01100//Metabolic pathways;K14306//nuclear pore complex protein Nup62+ko03013//RNA transport;K20547//basic endochitinase B [EC:3.2.1.14]+ko04016//MAPK signaling pathway - plant+ko00520//Amino sugar and nucleotide sugar metabolism+ko01100//Metabolic pathways;K14…
LOC_Os07g35940	0.05	0.37	1.9296	0.00228857	GO:0009057//macromolecule catabolic process;GO:0044238//primary metabolic process;GO:0005975//carbohydrate metabolic process;GO:0008152//metabolic process;GO:0043170//macromolecule metabolic process;GO:1901575//organic substance catabolic process;GO:0016052//carbohydrate catabolic process;GO:0000272//polysaccharide catabolic process;GO:0071704//organic substance metabolic process;GO:0009056//cata…	K01177//beta-amylase [EC:3.2.1.2]+ko00500//Starch and sucrose metabolism
LOC_Os06g17390	0.236	0.906	1.92876	6.15138e-08	GO:0071704//organic substance metabolic process;GO:0044281//small molecule metabolic process;GO:0044238//primary metabolic process;GO:0005975//carbohydrate metabolic process;GO:0006004//fucose metabolic process;GO:0005996//monosaccharide metabolic process;GO:0008152//metabolic process;GO:0019318//hexose metabolic process;GO:0005622//intracellular;GO:0005737//cytoplasm;GO:0016757//transferase acti…	K22733//magnesium transporter;K02941//large subunit ribosomal protein LP0+ko03010//Ribosome;K05747//Wiskott-Aldrich syndrome protein+ko04144//Endocytosis;K04733//interleukin-1 receptor-associated kinase 4 [EC:2.7.11.1]
LOC_Os08g39550	3.313	11.783	1.92866	1.92199e-14		K13420//LRR receptor-like serine/threonine-protein kinase FLS2 [EC:2.7.11.1]+ko04016//MAPK signaling pathway - plant+ko04626//Plant-pathogen interaction
LOC_Os09g26780	1.41	5.036	1.9277	4.94343e-14	GO:0050896//response to stimulus;GO:0010646//regulation of cell communication;GO:0031347//regulation of defense response;GO:0006952//defense response;GO:2000022//regulation of jasmonic acid mediated signaling pathway;GO:0080134//regulation of response to stress;GO:0023051//regulation of signaling;GO:0006950//response to stress;GO:0009611//response to wounding;GO:0050789//regulation of biological …	K13464//jasmonate ZIM domain-containing protein+ko04075//Plant hormone signal transduction
LOC_Os11g34610	0.276	1.176	1.92631	3.47182e-05	GO:0044238//primary metabolic process;GO:0043412//macromolecule modification;GO:0043170//macromolecule metabolic process;GO:0006807//nitrogen compound metabolic process;GO:1901564//organonitrogen compound metabolic process;GO:0016310//phosphorylation;GO:0044260//cellular macromolecule metabolic process;GO:0019538//protein metabolic process;GO:0006468//protein phosphorylation;GO:0044237//cellular …	K04733//interleukin-1 receptor-associated kinase 4 [EC:2.7.11.1]
LOC_Os12g26940	0.126	0.5	1.91829	1.79174e-06	GO:0009987//cellular process;GO:0042742//defense response to bacterium;GO:0023052//signaling;GO:0002229//defense response to oomycetes;GO:0007154//cell communication;GO:0009617//response to bacterium;GO:0071368//cellular response to cytokinin stimulus;GO:0051704//multi-organism process;GO:0009719//response to endogenous stimulus;GO:0006952//defense response;GO:0009607//response to biotic stimulus…	K04733//interleukin-1 receptor-associated kinase 4 [EC:2.7.11.1];K14489//arabidopsis histidine kinase 2/3/4 (cytokinin receptor) [EC:2.7.13.3]+ko04075//Plant hormone signal transduction
LOC_Os06g03890	0.493	2.306	1.91739	0.000271079	GO:0008152//metabolic process;GO:0006629//lipid metabolic process;GO:0044238//primary metabolic process;GO:0071704//organic substance metabolic process;GO:0003824//catalytic activity;GO:0016787//hydrolase activity;GO:0016788//hydrolase activity, acting on ester bonds;GO:0016298//lipase activity;	K01206//alpha-L-fucosidase [EC:3.2.1.51]+ko00511//Other glycan degradation
LOC_Os07g10770	1.686	5.78	1.91668	5.33458e-36	GO:0071555//cell wall organization;GO:0009987//cellular process;GO:0000910//cytokinesis;GO:0005976//polysaccharide metabolic process;GO:0000278//mitotic cell cycle;GO:0044249//cellular biosynthetic process;GO:0016051//carbohydrate biosynthetic process;GO:0051274//beta-glucan biosynthetic process;GO:0008152//metabolic process;GO:1901576//organic substance biosynthetic process;GO:0045229//external …	K10999//cellulose synthase A [EC:2.4.1.12]
LOC_Os06g01960	0.756	2.996	1.9096	8.02604e-06	GO:0009733//response to auxin;GO:0050896//response to stimulus;GO:0009725//response to hormone;GO:0010033//response to organic substance;GO:0009719//response to endogenous stimulus;GO:0042221//response to chemical;GO:0016021//integral component of membrane;GO:0016020//membrane;GO:0031224//intrinsic component of membrane;	K16281//RING-H2 zinc finger protein RHA1;K11699//RNA-dependent RNA polymerase [EC:2.7.7.48]
LOC_Os04g55620	0.033	0.19	1.90647	0.00156464	GO:0016020//membrane;GO:0031224//intrinsic component of membrane;GO:0016021//integral component of membrane;GO:0032555//purine ribonucleotide binding;GO:0005488//binding;GO:0036094//small molecule binding;GO:0016740//transferase activity;GO:0030554//adenyl nucleotide binding;GO:0043168//anion binding;GO:0097367//carbohydrate derivative binding;GO:0017076//purine nucleotide binding;GO:0016772//tra…	K04733//interleukin-1 receptor-associated kinase 4 [EC:2.7.11.1]
LOC_Os06g43370	0.093	0.463	1.90084	0.000525768	GO:0016020//membrane;GO:0031224//intrinsic component of membrane;GO:0016021//integral component of membrane;GO:1901363//heterocyclic compound binding;GO:0003824//catalytic activity;GO:0016705//oxidoreductase activity, acting on paired donors, with incorporation or reduction of molecular oxygen;GO:0046906//tetrapyrrole binding;GO:0005488//binding;GO:0097159//organic cyclic compound binding;GO:0005…	K00512//steroid 17alpha-monooxygenase / 17alpha-hydroxyprogesterone deacetylase [EC:1.14.14.19 1.14.14.32]+ko01100//Metabolic pathways
LOC_Os06g09980	0.736	2.776	1.89716	6.89448e-07	GO:0016020//membrane;GO:0031224//intrinsic component of membrane;GO:0016021//integral component of membrane;
LOC_Os12g41600	0.17	0.72	1.89276	8.67346e-05	GO:0050896//response to stimulus;GO:0009725//response to hormone;GO:0009733//response to auxin;GO:0009719//response to endogenous stimulus;GO:0010033//response to organic substance;GO:0042221//response to chemical;GO:0016773//phosphotransferase activity, alcohol group as acceptor;GO:0043168//anion binding;GO:0032555//purine ribonucleotide binding;GO:0016301//kinase activity;GO:0005524//ATP bindin…	K18626//trichohyalin;K18626//trichohyalin
LOC_Os01g65550	0.993	3.703	1.88813	1.04798e-06	GO:0005488//binding;GO:1901363//heterocyclic compound binding;GO:0003676//nucleic acid binding;GO:0097159//organic cyclic compound binding;GO:0003723//RNA binding;	K12741//heterogeneous nuclear ribonucleoprotein A1/A3+ko03040//Spliceosome;K12741//heterogeneous nuclear ribonucleoprotein A1/A3+ko03040//Spliceosome
LOC_Os08g23180	2.433	8.256	1.88063	7.91706e-18	GO:0031225//anchored component of membrane;GO:0071944//cell periphery;GO:0031224//intrinsic component of membrane;GO:0016020//membrane;GO:0031226//intrinsic component of plasma membrane;GO:0005886//plasma membrane;GO:0046658//anchored component of plasma membrane;	K21952//CASK-interacting protein
LOC_Os09g36350	0.946	3.266	1.88025	2.12468e-14	GO:0044247//cellular polysaccharide catabolic process;GO:0071554//cell wall organization or biogenesis;GO:0044262//cellular carbohydrate metabolic process;GO:0009056//catabolic process;GO:0044248//cellular catabolic process;GO:0016043//cellular component organization;GO:0044260//cellular macromolecule metabolic process;GO:0071555//cell wall organization;GO:0005975//carbohydrate metabolic process;…	K01179//endoglucanase [EC:3.2.1.4]+ko01100//Metabolic pathways+ko00500//Starch and sucrose metabolism;K01179//endoglucanase [EC:3.2.1.4]+ko01100//Metabolic pathways+ko00500//Starch and sucrose metabolism
LOC_Os01g11660	1.29	4.43	1.87872	1.25437e-14	GO:0003824//catalytic activity;GO:0016788//hydrolase activity, acting on ester bonds;GO:0016787//hydrolase activity;	K17987//next to BRCA1 gene 1 protein;K14306//nuclear pore complex protein Nup62+ko03013//RNA transport
LOC_Os08g44270	4.816	16.056	1.8749	2.51045e-33	GO:0006508//proteolysis;GO:0044265//cellular macromolecule catabolic process;GO:0044257//cellular protein catabolic process;GO:1901564//organonitrogen compound metabolic process;GO:0030163//protein catabolic process;GO:0009056//catabolic process;GO:0044260//cellular macromolecule metabolic process;GO:0006807//nitrogen compound metabolic process;GO:0044248//cellular catabolic process;GO:0044267//c…	K16292//KDEL-tailed cysteine endopeptidase [EC:3.4.22.-]
LOC_Os08g36680	0.326	1.303	1.87325	3.40515e-05	GO:0016835//carbon-oxygen lyase activity;GO:0005488//binding;GO:0004089//carbonate dehydratase activity;GO:0046872//metal ion binding;GO:0043169//cation binding;GO:0003824//catalytic activity;GO:0008270//zinc ion binding;GO:0046914//transition metal ion binding;GO:0043167//ion binding;GO:0016836//hydro-lyase activity;GO:0016829//lyase activity;	K01674//carbonic anhydrase [EC:4.2.1.1]+ko00910//Nitrogen metabolism;K01674//carbonic anhydrase [EC:4.2.1.1]+ko00910//Nitrogen metabolism
LOC_Os08g07260	0.19	0.883	1.87019	0.00059765	GO:0006725//cellular aromatic compound metabolic process;GO:0009058//biosynthetic process;GO:0044237//cellular metabolic process;GO:0044249//cellular biosynthetic process;GO:0009987//cellular process;GO:0008152//metabolic process;GO:0019438//aromatic compound biosynthetic process;GO:0005829//cytosol;GO:0005737//cytoplasm;GO:0005622//intracellular;GO:0016740//transferase activity;GO:0008757//S-ade…	K16040//trans-resveratrol di-O-methyltransferase [EC:2.1.1.240]+ko00945//Stilbenoid, diarylheptanoid and gingerol biosynthesis
LOC_Os01g71670	0.613	2.326	1.86621	9.01102e-06	GO:0008152//metabolic process;GO:0044238//primary metabolic process;GO:0071704//organic substance metabolic process;GO:0005975//carbohydrate metabolic process;GO:0016798//hydrolase activity, acting on glycosyl bonds;GO:0003824//catalytic activity;GO:0004553//hydrolase activity, hydrolyzing O-glycosyl compounds;GO:0016787//hydrolase activity;	K19891//glucan endo-1,3-beta-glucosidase 1/2/3 [EC:3.2.1.39]+ko00500//Starch and sucrose metabolism
LOC_Os11g46900	0.086	0.406	1.86547	0.000968193	GO:0005886//plasma membrane;GO:0071944//cell periphery;GO:0016021//integral component of membrane;GO:0031224//intrinsic component of membrane;GO:0016020//membrane;GO:0016772//transferase activity, transferring phosphorus-containing groups;GO:0097159//organic cyclic compound binding;GO:0035639//purine ribonucleoside triphosphate binding;GO:0043167//ion binding;GO:0140096//catalytic activity, actin…	K04733//interleukin-1 receptor-associated kinase 4 [EC:2.7.11.1]
LOC_Os07g36690	0.03	0.18	1.86515	0.00277594	GO:0071704//organic substance metabolic process;GO:0006073//cellular glucan metabolic process;GO:0051301//cell division;GO:0000271//polysaccharide biosynthetic process;GO:0061640//cytoskeleton-dependent cytokinesis;GO:0005976//polysaccharide metabolic process;GO:0000910//cytokinesis;GO:0043170//macromolecule metabolic process;GO:0034637//cellular carbohydrate biosynthetic process;GO:0030244//cell…	K20923//mixed-linked glucan synthase [EC:2.4.1.-]
LOC_Os08g45170	0.31	1.263	1.86508	8.67817e-06	GO:0031224//intrinsic component of membrane;GO:0016021//integral component of membrane;GO:0016020//membrane;	K14306//nuclear pore complex protein Nup62+ko03013//RNA transport;K04733//interleukin-1 receptor-associated kinase 4 [EC:2.7.11.1];K00423//L-ascorbate oxidase [EC:1.10.3.3]+ko01100//Metabolic pathways+ko00053//Ascorbate and aldarate metabolism
LOC_Os08g44040	0.09	0.386	1.86399	0.00105957	GO:0008152//metabolic process;GO:0071704//organic substance metabolic process;GO:0044238//primary metabolic process;GO:0005975//carbohydrate metabolic process;GO:0003824//catalytic activity;GO:0005488//binding;GO:0030246//carbohydrate binding;	K18195//rhamnogalacturonan endolyase [EC:4.2.2.23]
LOC_Os02g37590	0.293	1.05	1.86143	1.40902e-08	GO:0008152//metabolic process;GO:0044238//primary metabolic process;GO:0006629//lipid metabolic process;GO:0071704//organic substance metabolic process;GO:0008889//glycerophosphodiester phosphodiesterase activity;GO:0003824//catalytic activity;GO:0042578//phosphoric ester hydrolase activity;GO:0008081//phosphoric diester hydrolase activity;GO:0016787//hydrolase activity;GO:0016788//hydrolase acti…	K01126//glycerophosphoryl diester phosphodiesterase [EC:3.1.4.46]+ko00564//Glycerophospholipid metabolism
LOC_Os07g49114	20.42	72.136	1.8531	1.29179e-07	GO:0016021//integral component of membrane;GO:0016020//membrane;GO:0031224//intrinsic component of membrane;GO:0005524//ATP binding;GO:0005488//binding;GO:0035639//purine ribonucleoside triphosphate binding;GO:0140096//catalytic activity, acting on a protein;GO:0097367//carbohydrate derivative binding;GO:0003824//catalytic activity;GO:0016773//phosphotransferase activity, alcohol group as accepto…	K03006//DNA-directed RNA polymerase II subunit RPB1 [EC:2.7.7.6]+ko03020//RNA polymerase
LOC_Os12g11370	2.63	8.59	1.85188	4.66854e-38	GO:0016021//integral component of membrane;GO:0031224//intrinsic component of membrane;GO:0016020//membrane;	K13420//LRR receptor-like serine/threonine-protein kinase FLS2 [EC:2.7.11.1]+ko04016//MAPK signaling pathway - plant+ko04626//Plant-pathogen interaction
LOC_Os02g21700	0.193	0.84	1.85114	0.00035201	GO:0044093//positive regulation of molecular function;GO:0051347//positive regulation of transferase activity;GO:0006793//phosphorus metabolic process;GO:0019220//regulation of phosphate metabolic process;GO:0032270//positive regulation of cellular protein metabolic process;GO:0010562//positive regulation of phosphorus metabolic process;GO:0031325//positive regulation of cellular metabolic proces…	K20716//mitogen-activated protein kinase kinase kinase 17/18+ko04016//MAPK signaling pathway - plant
LOC_Os03g43410	0.3	1.186	1.84782	5.03369e-05	GO:0080090//regulation of primary metabolic process;GO:2000112//regulation of cellular macromolecule biosynthetic process;GO:0031323//regulation of cellular metabolic process;GO:0007154//cell communication;GO:0010556//regulation of macromolecule biosynthetic process;GO:0060255//regulation of macromolecule metabolic process;GO:0009734//auxin-activated signaling pathway;GO:0071495//cellular respons…	K14484//auxin-responsive protein IAA+ko04075//Plant hormone signal transduction
LOC_Os03g28170	0.556	2.146	1.84309	3.64578e-05	GO:0006464//cellular protein modification process;GO:0044267//cellular protein metabolic process;GO:0044237//cellular metabolic process;GO:0071704//organic substance metabolic process;GO:0008152//metabolic process;GO:0044238//primary metabolic process;GO:0043170//macromolecule metabolic process;GO:0006796//phosphate-containing compound metabolic process;GO:0009987//cellular process;GO:0043412//ma…	K04733//interleukin-1 receptor-associated kinase 4 [EC:2.7.11.1]
LOC_Os05g02310	3.006	9.956	1.8385	4.30592e-17	GO:0006793//phosphorus metabolic process;GO:0008152//metabolic process;GO:0006796//phosphate-containing compound metabolic process;GO:0044237//cellular metabolic process;GO:0009987//cellular process;GO:0005737//cytoplasm;GO:0005829//cytosol;GO:0005622//intracellular;GO:0016462//pyrophosphatase activity;GO:0003824//catalytic activity;GO:0043167//ion binding;GO:0016817//hydrolase activity, acting o…	K01507//inorganic pyrophosphatase [EC:3.6.1.1]+ko00190//Oxidative phosphorylation
LOC_Os11g32650	3.89	12.55	1.83489	6.61368e-38	GO:0008152//metabolic process;GO:0071704//organic substance metabolic process;GO:0009813//flavonoid biosynthetic process;GO:0009058//biosynthetic process;GO:0009812//flavonoid metabolic process;GO:1901576//organic substance biosynthetic process;GO:0016746//transferase activity, transferring acyl groups;GO:0003824//catalytic activity;GO:0016740//transferase activity;GO:0016747//transferase activit…	K00660//chalcone synthase [EC:2.3.1.74]+ko04712//Circadian rhythm - plant+ko01100//Metabolic pathways+ko01110//Biosynthesis of secondary metabolites+ko00941//Flavonoid biosynthesis
LOC_Os02g46100	0.97	3.366	1.83426	1.49552e-08	GO:1901564//organonitrogen compound metabolic process;GO:1901575//organic substance catabolic process;GO:0006511//ubiquitin-dependent protein catabolic process;GO:0044267//cellular protein metabolic process;GO:0006508//proteolysis;GO:0044257//cellular protein catabolic process;GO:1901565//organonitrogen compound catabolic process;GO:0006807//nitrogen compound metabolic process;GO:0009987//cellula…	K15706//E3 ubiquitin-protein ligase RNF167 [EC:2.3.2.27];K19040//E3 ubiquitin-protein ligase ATL10/75/76/77/78 [EC:2.3.2.27]
LOC_Os01g67950	0.49	1.933	1.83239	0.000102745		K22020//mucin-19
LOC_Os04g02880	8.873	28.986	1.83142	3.74262e-18
LOC_Os02g33160	0.343	1.52	1.82299	0.00135834	GO:0016787//hydrolase activity;GO:0003824//catalytic activity;	K13051//beta-aspartyl-peptidase (threonine type) [EC:3.4.19.5]
LOC_Os10g40730	0.543	1.87	1.82002	5.03908e-08	GO:0044703//multi-organism reproductive process;GO:0071554//cell wall organization or biogenesis;GO:0045229//external encapsulating structure organization;GO:0051704//multi-organism process;GO:0019953//sexual reproduction;GO:0022414//reproductive process;GO:0000003//reproduction;GO:0071840//cellular component organization or biogenesis;GO:0016043//cellular component organization;GO:0009987//cellu…	K20628//expansin
LOC_Os12g43390	3.363	11.19	1.81575	1.58627e-10	GO:0005576//extracellular region;	K04733//interleukin-1 receptor-associated kinase 4 [EC:2.7.11.1]
LOC_Os11g39990	0.776	2.613	1.81404	3.542e-08	GO:0009056//catabolic process;GO:0008152//metabolic process;GO:0071704//organic substance metabolic process;GO:1901575//organic substance catabolic process;GO:0044238//primary metabolic process;GO:0006629//lipid metabolic process;GO:0016042//lipid catabolic process;GO:0016298//lipase activity;GO:0016788//hydrolase activity, acting on ester bonds;GO:0047372//acylglycerol lipase activity;GO:0052689…	K13172//serine/arginine repetitive matrix protein 2
LOC_Os07g37230	21.776	68.936	1.81368	1.32607e-54	GO:0008152//metabolic process;GO:0046486//glycerolipid metabolic process;GO:0006644//phospholipid metabolic process;GO:0046488//phosphatidylinositol metabolic process;GO:0006650//glycerophospholipid metabolic process;GO:0044238//primary metabolic process;GO:0006629//lipid metabolic process;GO:0019637//organophosphate metabolic process;GO:0044237//cellular metabolic process;GO:0044255//cellular li…	K01082//3'(2'), 5'-bisphosphate nucleotidase [EC:3.1.3.7]+ko00920//Sulfur metabolism+ko01100//Metabolic pathways
LOC_Os09g34920	0.06	0.296	1.81327	0.00214459	GO:0006004//fucose metabolic process;GO:0005975//carbohydrate metabolic process;GO:1901136//carbohydrate derivative catabolic process;GO:0071704//organic substance metabolic process;GO:1901135//carbohydrate derivative metabolic process;GO:0044238//primary metabolic process;GO:0016139//glycoside catabolic process;GO:0044281//small molecule metabolic process;GO:0019318//hexose metabolic process;GO:…	K01206//alpha-L-fucosidase [EC:3.2.1.51]+ko00511//Other glycan degradation
LOC_Os01g64100	0.803	2.76	1.81229	5.65303e-08	GO:0071704//organic substance metabolic process;GO:0008152//metabolic process;GO:0005975//carbohydrate metabolic process;GO:0044238//primary metabolic process;GO:0005576//extracellular region;GO:0016798//hydrolase activity, acting on glycosyl bonds;GO:0004553//hydrolase activity, hydrolyzing O-glycosyl compounds;GO:0016787//hydrolase activity;GO:0004568//chitinase activity;GO:0003824//catalytic a…	K01183//chitinase [EC:3.2.1.14]+ko00520//Amino sugar and nucleotide sugar metabolism+ko01100//Metabolic pathways
LOC_Os03g04470	6.76	21.616	1.81123	1.82447e-22	GO:0005886//plasma membrane;GO:0016020//membrane;GO:0016021//integral component of membrane;GO:0031224//intrinsic component of membrane;GO:0071944//cell periphery;
LOC_Os11g47730	0.226	0.873	1.81056	0.00016429		K13172//serine/arginine repetitive matrix protein 2;K14325//RNA-binding protein with serine-rich domain 1+ko03015//mRNA surveillance pathway+ko03013//RNA transport;K13172//serine/arginine repetitive matrix protein 2;K14325//RNA-binding protein with serine-rich domain 1+ko03015//mRNA surveillance pathway+ko03013//RNA transport
LOC_Os12g27980	0.133	0.493	1.80957	1.6274e-05	GO:0005488//binding;GO:1901363//heterocyclic compound binding;GO:0097159//organic cyclic compound binding;GO:0046983//protein dimerization activity;GO:0005515//protein binding;GO:0003677//DNA binding;GO:0003676//nucleic acid binding;	K11863//Ataxin-3 [EC:3.4.22.-]+ko04141//Protein processing in endoplasmic reticulum;K00430//peroxidase [EC:1.11.1.7]+ko01100//Metabolic pathways+ko01110//Biosynthesis of secondary metabolites+ko00940//Phenylpropanoid biosynthesis
LOC_Os03g52040	0.743	2.466	1.80882	3.87512e-10	GO:0008152//metabolic process;GO:0019748//secondary metabolic process;GO:0008236//serine-type peptidase activity;GO:0017171//serine hydrolase activity;GO:0070011//peptidase activity, acting on L-amino acid peptides;GO:0016787//hydrolase activity;GO:0004185//serine-type carboxypeptidase activity;GO:0004180//carboxypeptidase activity;GO:0140096//catalytic activity, acting on a protein;GO:0070008//s…	K16296//serine carboxypeptidase-like clade I [EC:3.4.16.-];K16296//serine carboxypeptidase-like clade I [EC:3.4.16.-];K16296//serine carboxypeptidase-like clade I [EC:3.4.16.-]
LOC_Os07g15160	0.656	2.106	1.80864	2.2795e-10	GO:0006974//cellular response to DNA damage stimulus;GO:0051276//chromosome organization;GO:0006139//nucleobase-containing compound metabolic process;GO:0006950//response to stress;GO:1901360//organic cyclic compound metabolic process;GO:0044238//primary metabolic process;GO:0046483//heterocycle metabolic process;GO:0006996//organelle organization;GO:0000723//telomere maintenance;GO:0071704//orga…	K15255//ATP-dependent DNA helicase PIF1 [EC:3.6.4.12];K15255//ATP-dependent DNA helicase PIF1 [EC:3.6.4.12]
LOC_Os01g51570	15.82	49.936	1.80843	8.4039e-40	GO:0071704//organic substance metabolic process;GO:0044238//primary metabolic process;GO:0008152//metabolic process;GO:0005975//carbohydrate metabolic process;GO:0016020//membrane;GO:0031224//intrinsic component of membrane;GO:0046658//anchored component of plasma membrane;GO:0005886//plasma membrane;GO:0031225//anchored component of membrane;GO:0071944//cell periphery;GO:0031226//intrinsic compo…	K19891//glucan endo-1,3-beta-glucosidase 1/2/3 [EC:3.2.1.39]+ko00500//Starch and sucrose metabolism
LOC_Os06g51050	0.266	0.99	1.80477	0.000209497	GO:0009620//response to fungus;GO:0043170//macromolecule metabolic process;GO:0044238//primary metabolic process;GO:0044036//cell wall macromolecule metabolic process;GO:1901565//organonitrogen compound catabolic process;GO:0046348//amino sugar catabolic process;GO:1901575//organic substance catabolic process;GO:0042737//drug catabolic process;GO:0006022//aminoglycan metabolic process;GO:1901136/…	K20547//basic endochitinase B [EC:3.2.1.14]+ko04016//MAPK signaling pathway - plant+ko00520//Amino sugar and nucleotide sugar metabolism+ko01100//Metabolic pathways
LOC_Os06g37560	3.196	10.153	1.80197	1.58528e-23	GO:0005975//carbohydrate metabolic process;GO:0071704//organic substance metabolic process;GO:0044238//primary metabolic process;GO:0008152//metabolic process;GO:0043229//intracellular organelle;GO:0030312//external encapsulating structure;GO:0043231//intracellular membrane-bounded organelle;GO:0071944//cell periphery;GO:0005737//cytoplasm;GO:0005622//intracellular;GO:0043227//membrane-bounded or…	K12309//beta-galactosidase [EC:3.2.1.23]+ko00600//Sphingolipid metabolism+ko00604//Glycosphingolipid biosynthesis - ganglio series+ko00531//Glycosaminoglycan degradation+ko00511//Other glycan degradation+ko01100//Metabolic pathways+ko00052//Galactose metabolism
LOC_Os10g34040	0.136	0.59	1.80139	0.000637353		K07192//flotillin
LOC_Os01g18240	0.15	0.586	1.79813	0.000149537	GO:0065007//biological regulation;GO:0030154//cell differentiation;GO:0032502//developmental process;GO:0050789//regulation of biological process;GO:0050794//regulation of cellular process;GO:0010119//regulation of stomatal movement;GO:0048869//cellular developmental process;GO:0009987//cellular process;GO:0005622//intracellular;GO:0043231//intracellular membrane-bounded organelle;GO:0043229//int…	K09422//transcription factor MYB, plant
LOC_Os06g43170	0.126	0.493	1.79547	0.000127626	GO:0016020//membrane;GO:0031224//intrinsic component of membrane;GO:0016021//integral component of membrane;GO:0016772//transferase activity, transferring phosphorus-containing groups;GO:0032553//ribonucleotide binding;GO:0008144//drug binding;GO:1901265//nucleoside phosphate binding;GO:0140096//catalytic activity, acting on a protein;GO:0016773//phosphotransferase activity, alcohol group as acce…	K04733//interleukin-1 receptor-associated kinase 4 [EC:2.7.11.1]
LOC_Os05g47840	0.803	2.69	1.79307	4.12536e-08	GO:0034754//cellular hormone metabolic process;GO:0071704//organic substance metabolic process;GO:0009691//cytokinin biosynthetic process;GO:0006399//tRNA metabolic process;GO:0008033//tRNA processing;GO:0065008//regulation of biological quality;GO:0044249//cellular biosynthetic process;GO:0006400//tRNA modification;GO:0006139//nucleobase-containing compound metabolic process;GO:0009987//cellular…	K10760//adenylate dimethylallyltransferase (cytokinin synthase) [EC:2.5.1.27 2.5.1.112]+ko00908//Zeatin biosynthesis+ko01100//Metabolic pathways+ko01110//Biosynthesis of secondary metabolites
LOC_Os08g36250	0.69	2.25	1.78904	5.16844e-11
LOC_Os01g16200	0.933	3.153	1.78896	5.85791e-08	GO:0010605//negative regulation of macromolecule metabolic process;GO:0019222//regulation of metabolic process;GO:0050794//regulation of cellular process;GO:0065009//regulation of molecular function;GO:0052547//regulation of peptidase activity;GO:0032269//negative regulation of cellular protein metabolic process;GO:0010951//negative regulation of endopeptidase activity;GO:0045861//negative regula…	K13963//serpin B
LOC_Os01g53370	0.14	0.57	1.78871	0.000511474	GO:0005622//intracellular;GO:0031224//intrinsic component of membrane;GO:0043231//intracellular membrane-bounded organelle;GO:0016021//integral component of membrane;GO:0043227//membrane-bounded organelle;GO:0043229//intracellular organelle;GO:0043226//organelle;GO:0016020//membrane;GO:0016757//transferase activity, transferring glycosyl groups;GO:0003824//catalytic activity;GO:0016758//transfera…	K22845//phlorizin synthase [EC:2.4.1.357]+ko01110//Biosynthesis of secondary metabolites+ko00941//Flavonoid biosynthesis
LOC_Os06g28780	0.106	0.493	1.7854	0.00187811	GO:0005488//binding;GO:0003676//nucleic acid binding;GO:0046914//transition metal ion binding;GO:0097159//organic cyclic compound binding;GO:0043169//cation binding;GO:1901363//heterocyclic compound binding;GO:0008270//zinc ion binding;GO:0043167//ion binding;GO:0046872//metal ion binding;	K19026//spatacsin;K22804//structural maintenance of chromosomes protein 6
LOC_Os01g72290	0.396	1.433	1.78324	2.91389e-05	GO:2000280//regulation of root development;GO:0051234//establishment of localization;GO:0051179//localization;GO:0010496//intercellular transport;GO:0009987//cellular process;GO:0006810//transport;GO:2000026//regulation of multicellular organismal development;GO:0050789//regulation of biological process;GO:0065007//biological regulation;GO:0050793//regulation of developmental process;GO:0051239//…	K08360//cytochrome b-561 [EC:7.2.1.3];K14325//RNA-binding protein with serine-rich domain 1+ko03015//mRNA surveillance pathway+ko03013//RNA transport;K08360//cytochrome b-561 [EC:7.2.1.3];K14325//RNA-binding protein with serine-rich domain 1+ko03015//mRNA surveillance pathway+ko03013//RNA transport
LOC_Os11g47630	0.62	2.173	1.77341	9.89655e-06	GO:0005488//binding;GO:1901363//heterocyclic compound binding;GO:0003676//nucleic acid binding;GO:0097159//organic cyclic compound binding;	K22534//PR domain zinc finger protein 5;K05747//Wiskott-Aldrich syndrome protein+ko04144//Endocytosis
LOC_Os07g04150	0.103	0.436	1.77257	0.000840301		K22020//mucin-19
LOC_Os02g02040	0.946	2.956	1.77059	8.75463e-14	GO:0006796//phosphate-containing compound metabolic process;GO:0010089//xylem development;GO:0043170//macromolecule metabolic process;GO:0036211//protein modification process;GO:0032502//developmental process;GO:0009987//cellular process;GO:0006468//protein phosphorylation;GO:0009888//tissue development;GO:0044237//cellular metabolic process;GO:0019538//protein metabolic process;GO:0006807//nitro…	K04733//interleukin-1 receptor-associated kinase 4 [EC:2.7.11.1];K04733//interleukin-1 receptor-associated kinase 4 [EC:2.7.11.1];K04733//interleukin-1 receptor-associated kinase 4 [EC:2.7.11.1];K04733//interleukin-1 receptor-associated kinase 4 [EC:2.7.11.1];K04733//interleukin-1 receptor-associated kinase 4 [EC:2.7.11.1];K04733//interleukin-1 receptor-associated kinase 4 [EC:2.7.11.1]
LOC_Os07g13780	0.21	0.983	1.76779	0.00222756	GO:0043229//intracellular organelle;GO:0043231//intracellular membrane-bounded organelle;GO:0005622//intracellular;GO:0043226//organelle;GO:0043227//membrane-bounded organelle;GO:0035251//UDP-glucosyltransferase activity;GO:0016758//transferase activity, transferring hexosyl groups;GO:0008194//UDP-glycosyltransferase activity;GO:0046527//glucosyltransferase activity;GO:0080044//quercetin 7-O-gluc…	K13493//cytokinin-N-glucosyltransferase [EC:2.4.1.-]+ko00908//Zeatin biosynthesis+ko01110//Biosynthesis of secondary metabolites;K13227//UDP-glucosyltransferase BX8/BX9 [EC:2.4.1.202]+ko00402//Benzoxazinoid biosynthesis
LOC_Os03g22510	0.303	1.176	1.76557	0.000338001		K20547//basic endochitinase B [EC:3.2.1.14]+ko04016//MAPK signaling pathway - plant+ko00520//Amino sugar and nucleotide sugar metabolism+ko01100//Metabolic pathways
LOC_Os04g24430	0.223	0.806	1.76548	5.92846e-05	GO:0005975//carbohydrate metabolic process;GO:0044238//primary metabolic process;GO:0009311//oligosaccharide metabolic process;GO:0005984//disaccharide metabolic process;GO:0044262//cellular carbohydrate metabolic process;GO:0044237//cellular metabolic process;GO:0009987//cellular process;GO:0008152//metabolic process;GO:0005985//sucrose metabolic process;GO:0071704//organic substance metabolic p…	K00695//sucrose synthase [EC:2.4.1.13]+ko01100//Metabolic pathways+ko00500//Starch and sucrose metabolism
LOC_Os04g36820	0.243	1.006	1.7568	0.00180429	GO:0016021//integral component of membrane;GO:0016020//membrane;GO:0031224//intrinsic component of membrane;
LOC_Os03g01330	3.803	13.916	1.75629	0.000201144	GO:0016020//membrane;GO:0016021//integral component of membrane;GO:0031224//intrinsic component of membrane;	K21952//CASK-interacting protein
LOC_Os06g19095	0.11	0.503	1.75604	0.00328735
LOC_Os08g30080	0.203	0.75	1.75471	0.000508871	GO:0051213//dioxygenase activity;GO:0043169//cation binding;GO:0016491//oxidoreductase activity;GO:0005488//binding;GO:0043167//ion binding;GO:0003824//catalytic activity;GO:0046872//metal ion binding;	K13229//2,4-dihydroxy-1,4-benzoxazin-3-one-glucoside dioxygenase [EC:1.14.11.59]+ko00402//Benzoxazinoid biosynthesis;K03006//DNA-directed RNA polymerase II subunit RPB1 [EC:2.7.7.6]+ko03020//RNA polymerase
LOC_Os08g14200	0.173	0.783	1.75304	0.00218996	GO:0044238//primary metabolic process;GO:0071704//organic substance metabolic process;GO:0044264//cellular polysaccharide metabolic process;GO:0044237//cellular metabolic process;GO:0071554//cell wall organization or biogenesis;GO:0044262//cellular carbohydrate metabolic process;GO:0071840//cellular component organization or biogenesis;GO:0045229//external encapsulating structure organization;GO:…	K08235//xyloglucan:xyloglucosyl transferase [EC:2.4.1.207]
LOC_Os05g51780	0.59	1.946	1.7491	8.41166e-07	GO:0016020//membrane;GO:0031224//intrinsic component of membrane;GO:0016021//integral component of membrane;	K10664//E3 ubiquitin-protein ligase ATL6/9/15/31/42/55 [EC:2.3.2.27]
LOC_Os04g33390	2.566	8.72	1.7468	1.67297e-05	GO:0009094//L-phenylalanine biosynthetic process;GO:0009072//aromatic amino acid family metabolic process;GO:0044281//small molecule metabolic process;GO:0009095//aromatic amino acid family biosynthetic process, prephenate pathway;GO:0006807//nitrogen compound metabolic process;GO:0016053//organic acid biosynthetic process;GO:1901564//organonitrogen compound metabolic process;GO:0009058//biosynth…	K05359//arogenate/prephenate dehydratase [EC:4.2.1.91 4.2.1.51]+ko01230//Biosynthesis of amino acids+ko01100//Metabolic pathways+ko01110//Biosynthesis of secondary metabolites+ko00400//Phenylalanine, tyrosine and tryptophan biosynthesis
LOC_Os12g34580	0.166	0.543	1.74583	1.57974e-05	GO:0044238//primary metabolic process;GO:0006259//DNA metabolic process;GO:0034641//cellular nitrogen compound metabolic process;GO:0044260//cellular macromolecule metabolic process;GO:1901360//organic cyclic compound metabolic process;GO:0046483//heterocycle metabolic process;GO:0006139//nucleobase-containing compound metabolic process;GO:0090304//nucleic acid metabolic process;GO:0071704//organ…	K03006//DNA-directed RNA polymerase II subunit RPB1 [EC:2.7.7.6]+ko03020//RNA polymerase;K22686//pro-apoptotic serine protease NMA111 [EC:3.4.21.-];K12447//UDP-sugar pyrophosphorylase [EC:2.7.7.64]+ko00520//Amino sugar and nucleotide sugar metabolism+ko00040//Pentose and glucuronate interconversions+ko01100//Metabolic pathways+ko00052//Galactose metabolism+ko00053//Ascorbate and aldarate metaboli…
LOC_Os06g07790	1.303	3.993	1.74554	9.13324e-22		K12598//ATP-dependent RNA helicase DOB1 [EC:3.6.4.13]+ko03018//RNA degradation;K19026//spatacsin;K22804//structural maintenance of chromosomes protein 6;K12879//THO complex subunit 2+ko03040//Spliceosome+ko03013//RNA transport;K13447//respiratory burst oxidase [EC:1.6.3.- 1.11.1.-]+ko04016//MAPK signaling pathway - plant+ko04626//Plant-pathogen interaction
LOC_Os12g05290	0.09	0.316	1.74465	0.000215932	GO:0008152//metabolic process;GO:0009987//cellular process;GO:0015074//DNA integration;GO:0044237//cellular metabolic process;GO:0006807//nitrogen compound metabolic process;GO:0043170//macromolecule metabolic process;GO:0006259//DNA metabolic process;GO:0006139//nucleobase-containing compound metabolic process;GO:0006725//cellular aromatic compound metabolic process;GO:0044260//cellular macromol…	K00284//glutamate synthase (ferredoxin) [EC:1.4.7.1]+ko00910//Nitrogen metabolism+ko00630//Glyoxylate and dicarboxylate metabolism;K12447//UDP-sugar pyrophosphorylase [EC:2.7.7.64]+ko00520//Amino sugar and nucleotide sugar metabolism+ko00040//Pentose and glucuronate interconversions+ko01100//Metabolic pathways+ko00052//Galactose metabolism+ko00053//Ascorbate and aldarate metabolism;K22686//pro-ap…
LOC_Os04g43410	0.666	2.146	1.74275	3.35444e-08	GO:0044238//primary metabolic process;GO:0071704//organic substance metabolic process;GO:0005975//carbohydrate metabolic process;GO:0008152//metabolic process;GO:0016020//membrane;GO:0031224//intrinsic component of membrane;GO:0016021//integral component of membrane;GO:0016798//hydrolase activity, acting on glycosyl bonds;GO:0003824//catalytic activity;GO:0016787//hydrolase activity;GO:0004553//h…	K05350//beta-glucosidase [EC:3.2.1.21]+ko01100//Metabolic pathways+ko00500//Starch and sucrose metabolism+ko01110//Biosynthesis of secondary metabolites+ko00460//Cyanoamino acid metabolism+ko00940//Phenylpropanoid biosynthesis
LOC_Os04g44850	2.393	7.486	1.73867	2.4746e-10	GO:0012505//endomembrane system;GO:0005622//intracellular;GO:0043227//membrane-bounded organelle;GO:0043229//intracellular organelle;GO:0005794//Golgi apparatus;GO:0043226//organelle;GO:0043231//intracellular membrane-bounded organelle;GO:0005737//cytoplasm;GO:0016740//transferase activity;GO:0016757//transferase activity, transferring glycosyl groups;GO:0003824//catalytic activity;	K20893//probable galacturonosyltransferase-like 1 [EC:2.4.1.-]
LOC_Os10g39150	46.4	138.87	1.73691	2.24595e-66	GO:0009534//chloroplast thylakoid;GO:0043227//membrane-bounded organelle;GO:0009535//chloroplast thylakoid membrane;GO:0043226//organelle;GO:0016020//membrane;GO:0043231//intracellular membrane-bounded organelle;GO:0031984//organelle subcompartment;GO:0055035//plastid thylakoid membrane;GO:0043229//intracellular organelle;GO:0009536//plastid;GO:0009579//thylakoid;GO:0031976//plastid thylakoid;GO:…	K01092//myo-inositol-1(or 4)-monophosphatase [EC:3.1.3.25]+ko01100//Metabolic pathways+ko04070//Phosphatidylinositol signaling system+ko00562//Inositol phosphate metabolism;K06627//cyclin-A
LOC_Os06g21570	1.383	4.25	1.73526	1.3881e-14	GO:0008152//metabolic process;GO:0071704//organic substance metabolic process;GO:0044238//primary metabolic process;GO:0005975//carbohydrate metabolic process;GO:0016798//hydrolase activity, acting on glycosyl bonds;GO:0004553//hydrolase activity, hydrolyzing O-glycosyl compounds;GO:0003824//catalytic activity;GO:0016787//hydrolase activity;	K01188//beta-glucosidase [EC:3.2.1.21]+ko01100//Metabolic pathways+ko00500//Starch and sucrose metabolism+ko01110//Biosynthesis of secondary metabolites+ko00460//Cyanoamino acid metabolism+ko00940//Phenylpropanoid biosynthesis
LOC_Os04g45750	0.18	0.623	1.73479	3.52398e-05	GO:0043226//organelle;GO:0043231//intracellular membrane-bounded organelle;GO:0043229//intracellular organelle;GO:0043227//membrane-bounded organelle;GO:0005622//intracellular;GO:0005634//nucleus;GO:0003676//nucleic acid binding;GO:0003700//DNA-binding transcription factor activity;GO:0003677//DNA binding;GO:0097159//organic cyclic compound binding;GO:0043565//sequence-specific DNA binding;GO:014…	K22020//mucin-19;K22020//mucin-19
LOC_Os08g37940	20.53	61.49	1.73329	4.95085e-37	GO:0043231//intracellular membrane-bounded organelle;GO:0031975//envelope;GO:0043227//membrane-bounded organelle;GO:0005737//cytoplasm;GO:0009536//plastid;GO:0043229//intracellular organelle;GO:0005622//intracellular;GO:0009526//plastid envelope;GO:0009570//chloroplast stroma;GO:0031967//organelle envelope;GO:0043226//organelle;GO:0009507//chloroplast;GO:0009532//plastid stroma;GO:0009941//chloro…	K20884//riboflavin kinase / FMN hydrolase [EC:2.7.1.26 3.1.3.102]+ko00740//Riboflavin metabolism+ko01100//Metabolic pathways+ko01110//Biosynthesis of secondary metabolites;K01051//pectinesterase [EC:3.1.1.11]+ko00040//Pentose and glucuronate interconversions+ko01100//Metabolic pathways
LOC_Os01g24710	0.73	2.37	1.72363	3.34229e-06	GO:0030246//carbohydrate binding;GO:0005488//binding;	K04733//interleukin-1 receptor-associated kinase 4 [EC:2.7.11.1];K04733//interleukin-1 receptor-associated kinase 4 [EC:2.7.11.1];K04733//interleukin-1 receptor-associated kinase 4 [EC:2.7.11.1];K04733//interleukin-1 receptor-associated kinase 4 [EC:2.7.11.1]
LOC_Os07g27810	0.676	2.19	1.72303	6.30623e-07	GO:0016020//membrane;GO:0031224//intrinsic component of membrane;GO:0016021//integral component of membrane;	K14306//nuclear pore complex protein Nup62+ko03013//RNA transport
LOC_Os02g52490	0.17	0.653	1.72179	0.000729093
LOC_Os04g55670	1.55	4.89	1.71699	1.59948e-07	GO:0044237//cellular metabolic process;GO:0010417//glucuronoxylan biosynthetic process;GO:0044038//cell wall macromolecule biosynthetic process;GO:0045229//external encapsulating structure organization;GO:0016051//carbohydrate biosynthetic process;GO:0045492//xylan biosynthetic process;GO:0071555//cell wall organization;GO:0045491//xylan metabolic process;GO:0034637//cellular carbohydrate biosynt…	K20871//putative beta-1,4-xylosyltransferase IRX14 [EC:2.4.2.-]
LOC_Os05g08370	2.373	7.046	1.71461	1.40325e-34	GO:0051273//beta-glucan metabolic process;GO:0034637//cellular carbohydrate biosynthetic process;GO:0009059//macromolecule biosynthetic process;GO:0000910//cytokinesis;GO:0071554//cell wall organization or biogenesis;GO:0030244//cellulose biosynthetic process;GO:0044085//cellular component biogenesis;GO:0005975//carbohydrate metabolic process;GO:0034645//cellular macromolecule biosynthetic proces…	K10999//cellulose synthase A [EC:2.4.1.12]
LOC_Os05g25240	1.296	4.696	1.7118	0.000357017	GO:0016021//integral component of membrane;GO:0016020//membrane;GO:0031224//intrinsic component of membrane;
LOC_Os10g02040	7.496	22.31	1.70994	2.7669e-18	GO:0072593//reactive oxygen species metabolic process;GO:0009056//catabolic process;GO:0044237//cellular metabolic process;GO:0042743//hydrogen peroxide metabolic process;GO:0006979//response to oxidative stress;GO:0006950//response to stress;GO:0050896//response to stimulus;GO:0016999//antibiotic metabolic process;GO:0042737//drug catabolic process;GO:0008152//metabolic process;GO:0017001//antib…	K00430//peroxidase [EC:1.11.1.7]+ko01100//Metabolic pathways+ko01110//Biosynthesis of secondary metabolites+ko00940//Phenylpropanoid biosynthesis;K00430//peroxidase [EC:1.11.1.7]+ko01100//Metabolic pathways+ko01110//Biosynthesis of secondary metabolites+ko00940//Phenylpropanoid biosynthesis
LOC_Os01g36070	8.11	24.106	1.70707	1.96517e-19	GO:0071702//organic substance transport;GO:0006810//transport;GO:0008643//carbohydrate transport;GO:0051234//establishment of localization;GO:0051179//localization;GO:0016020//membrane;GO:0005886//plasma membrane;GO:0016021//integral component of membrane;GO:0071944//cell periphery;GO:0031224//intrinsic component of membrane;	K15382//solute carrier family 50 (sugar transporter)
LOC_Os03g01320	2.163	6.61	1.69978	8.18695e-09		K02184//formin 2;K10747//DNA ligase 1 [EC:6.5.1.1 6.5.1.6 6.5.1.7]+ko03420//Nucleotide excision repair+ko03030//DNA replication+ko03410//Base excision repair+ko03430//Mismatch repair
LOC_Os02g37654	2.763	8.156	1.69829	2.01682e-19	GO:0008152//metabolic process;GO:0006629//lipid metabolic process;GO:0044238//primary metabolic process;GO:0071704//organic substance metabolic process;GO:0016740//transferase activity;GO:0016746//transferase activity, transferring acyl groups;GO:0016747//transferase activity, transferring acyl groups other than amino-acyl groups;GO:0008374//O-acyltransferase activity;GO:0003824//catalytic activi…	K06129//lysophospholipase III [EC:3.1.1.5]+ko00564//Glycerophospholipid metabolism
LOC_Os01g12520	0.393	1.363	1.69823	0.000131082	GO:0044281//small molecule metabolic process;GO:1901362//organic cyclic compound biosynthetic process;GO:0009064//glutamine family amino acid metabolic process;GO:0071704//organic substance metabolic process;GO:0006561//proline biosynthetic process;GO:0051234//establishment of localization;GO:1901607//alpha-amino acid biosynthetic process;GO:0006082//organic acid metabolic process;GO:1901576//org…	K15109//solute carrier family 25 (mitochondrial carnitine/acylcarnitine transporter), member 20/29
LOC_Os11g01340	0.76	2.35	1.69627	2.00255e-07	GO:0006629//lipid metabolic process;GO:0071704//organic substance metabolic process;GO:0044238//primary metabolic process;GO:0008152//metabolic process;GO:0016021//integral component of membrane;GO:0016020//membrane;GO:0031224//intrinsic component of membrane;GO:0016717//oxidoreductase activity, acting on paired donors, with oxidation of a pair of donors resulting in the reduction of molecular ox…	K10257//acyl-lipid omega-3 desaturase [EC:1.14.19.25 1.14.19.35 1.14.19.36];K10257//acyl-lipid omega-3 desaturase [EC:1.14.19.25 1.14.19.35 1.14.19.36];K10257//acyl-lipid omega-3 desaturase [EC:1.14.19.25 1.14.19.35 1.14.19.36]
LOC_Os10g33104	0.816	2.446	1.69601	2.03598e-10	GO:0016020//membrane;GO:0016021//integral component of membrane;GO:0031224//intrinsic component of membrane;	K13420//LRR receptor-like serine/threonine-protein kinase FLS2 [EC:2.7.11.1]+ko04016//MAPK signaling pathway - plant+ko04626//Plant-pathogen interaction;K13420//LRR receptor-like serine/threonine-protein kinase FLS2 [EC:2.7.11.1]+ko04016//MAPK signaling pathway - plant+ko04626//Plant-pathogen interaction
LOC_Os12g27440	3.1	9.656	1.69152	5.21339e-07	GO:0016021//integral component of membrane;GO:0031224//intrinsic component of membrane;GO:0016020//membrane;
LOC_Os02g11770	4.62	13.916	1.68394	4.64243e-11
LOC_Os01g66010	1.526	4.55	1.6837	3.4611e-12	GO:0015711//organic anion transport;GO:0006810//transport;GO:0071705//nitrogen compound transport;GO:0046942//carboxylic acid transport;GO:0006865//amino acid transport;GO:1903825//organic acid transmembrane transport;GO:0098656//anion transmembrane transport;GO:0034220//ion transmembrane transport;GO:0051234//establishment of localization;GO:0003333//amino acid transmembrane transport;GO:0071702…	K14209//solute carrier family 36 (proton-coupled amino acid transporter)
LOC_Os09g25060	2.41	7.21	1.67931	1.41567e-11	GO:0009617//response to bacterium;GO:0042221//response to chemical;GO:0009605//response to external stimulus;GO:0046677//response to antibiotic;GO:0010200//response to chitin;GO:0010033//response to organic substance;GO:0009620//response to fungus;GO:0014070//response to organic cyclic compound;GO:1901700//response to oxygen-containing compound;GO:0051704//multi-organism process;GO:0010243//respo…	K13424//WRKY transcription factor 33+ko04016//MAPK signaling pathway - plant+ko04626//Plant-pathogen interaction;K18835//WRKY transcription factor 2+ko04626//Plant-pathogen interaction
LOC_Os12g11420	2.113	7.17	1.67332	0.00013066	GO:0016021//integral component of membrane;GO:0031224//intrinsic component of membrane;GO:0016020//membrane;
LOC_Os09g27890	0.156	0.543	1.66946	0.00096306		K01180//endo-1,3(4)-beta-glucanase [EC:3.2.1.6];K03006//DNA-directed RNA polymerase II subunit RPB1 [EC:2.7.7.6]+ko03020//RNA polymerase;K01180//endo-1,3(4)-beta-glucanase [EC:3.2.1.6];K03006//DNA-directed RNA polymerase II subunit RPB1 [EC:2.7.7.6]+ko03020//RNA polymerase
LOC_Os07g41410	13.84	40.28	1.66882	4.97169e-19	GO:0016020//membrane;GO:0016021//integral component of membrane;GO:0031224//intrinsic component of membrane;	K14325//RNA-binding protein with serine-rich domain 1+ko03015//mRNA surveillance pathway+ko03013//RNA transport
LOC_Os06g16640	1.493	4.466	1.66759	1.96735e-08
LOC_Os03g43670	0.07	0.236	1.66654	0.000612032	GO:0032502//developmental process;GO:0006807//nitrogen compound metabolic process;GO:1905392//plant organ morphogenesis;GO:0007275//multicellular organism development;GO:0044267//cellular protein metabolic process;GO:0009908//flower development;GO:0071704//organic substance metabolic process;GO:0006464//cellular protein modification process;GO:0090697//post-embryonic plant organ morphogenesis;GO:…	K04730//interleukin-1 receptor-associated kinase 1 [EC:2.7.11.1];K04733//interleukin-1 receptor-associated kinase 4 [EC:2.7.11.1]
LOC_Os07g13100	3.263	9.65	1.66625	4.29274e-11	GO:0005622//intracellular;GO:0043231//intracellular membrane-bounded organelle;GO:0043227//membrane-bounded organelle;GO:0043229//intracellular organelle;GO:0005634//nucleus;GO:0043226//organelle;GO:0016020//membrane;GO:0031224//intrinsic component of membrane;GO:0016021//integral component of membrane;GO:0003690//double-stranded DNA binding;GO:1901363//heterocyclic compound binding;GO:0097159//o…	K23047//E3 ubiquitin-protein ligase UNKL [EC:2.3.2.27]
LOC_Os02g02840	0.963	2.856	1.6656	5.1937e-10	GO:0043254//regulation of protein-containing complex assembly;GO:0065008//regulation of biological quality;GO:0016477//cell migration;GO:0050789//regulation of biological process;GO:0048870//cell motility;GO:0009653//anatomical structure morphogenesis;GO:0032956//regulation of actin cytoskeleton organization;GO:0050896//response to stimulus;GO:0051179//localization;GO:0071840//cellular component …	K04392//Ras-related C3 botulinum toxin substrate 1+ko04145//Phagosome
LOC_Os05g20954	0.31	1.153	1.65894	0.000263248
LOC_Os09g15810	13.29	38.576	1.65847	4.44745e-16	GO:0006730//one-carbon metabolic process;GO:0006807//nitrogen compound metabolic process;GO:0006725//cellular aromatic compound metabolic process;GO:0042558//pteridine-containing compound metabolic process;GO:0043603//cellular amide metabolic process;GO:0043436//oxoacid metabolic process;GO:0008152//metabolic process;GO:0009987//cellular process;GO:0006575//cellular modified amino acid metabolic …	K00288//methylenetetrahydrofolate dehydrogenase (NADP+) / methenyltetrahydrofolate cyclohydrolase / formyltetrahydrofolate synthetase [EC:1.5.1.5 3.5.4.9 6.3.4.3]+ko00670//One carbon pool by folate+ko01100//Metabolic pathways
LOC_Os12g40900	0.39	1.223	1.65801	7.80788e-06	GO:0009725//response to hormone;GO:0051716//cellular response to stimulus;GO:0031323//regulation of cellular metabolic process;GO:0007154//cell communication;GO:0070887//cellular response to chemical stimulus;GO:0009987//cellular process;GO:0032870//cellular response to hormone stimulus;GO:0050789//regulation of biological process;GO:0060255//regulation of macromolecule metabolic process;GO:00714…	K14484//auxin-responsive protein IAA+ko04075//Plant hormone signal transduction
LOC_Os01g45914	15.256	43.693	1.65695	2.15019e-25
LOC_Os07g24830	4.006	11.553	1.65081	2.42725e-11
LOC_Os06g02630	0.46	1.42	1.64781	2.95879e-06	GO:0016020//membrane;GO:0016021//integral component of membrane;GO:0031224//intrinsic component of membrane;	K13171//serine/arginine repetitive matrix protein 1+ko03015//mRNA surveillance pathway+ko03013//RNA transport
LOC_Os05g46470	1.476	4.426	1.64752	1.31898e-07
LOC_Os11g01710	1.416	4.293	1.64202	5.35217e-06	GO:0006259//DNA metabolic process;GO:0006725//cellular aromatic compound metabolic process;GO:0044260//cellular macromolecule metabolic process;GO:0009987//cellular process;GO:0034641//cellular nitrogen compound metabolic process;GO:0006139//nucleobase-containing compound metabolic process;GO:0090304//nucleic acid metabolic process;GO:0071704//organic substance metabolic process;GO:0015074//DNA i…
LOC_Os08g28790	1.14	3.556	1.64041	1.84543e-05	GO:0005576//extracellular region;GO:0048046//apoplast;	K01870//isoleucyl-tRNA synthetase [EC:6.1.1.5]+ko00970//Aminoacyl-tRNA biosynthesis;K10775//phenylalanine ammonia-lyase [EC:4.3.1.24]+ko01100//Metabolic pathways+ko01110//Biosynthesis of secondary metabolites+ko00940//Phenylpropanoid biosynthesis+ko00360//Phenylalanine metabolism;K14325//RNA-binding protein with serine-rich domain 1+ko03015//mRNA surveillance pathway+ko03013//RNA transport;K22020…
LOC_Os06g13700	1.98	6.326	1.64003	0.000288108	GO:0016021//integral component of membrane;GO:0031224//intrinsic component of membrane;GO:0016020//membrane;
LOC_Os03g30950	0.343	1.083	1.63666	4.23336e-05	GO:0044281//small molecule metabolic process;GO:0044255//cellular lipid metabolic process;GO:0016053//organic acid biosynthetic process;GO:0044238//primary metabolic process;GO:0044249//cellular biosynthetic process;GO:1901576//organic substance biosynthetic process;GO:0008152//metabolic process;GO:0071704//organic substance metabolic process;GO:0006082//organic acid metabolic process;GO:0006633/…	K03921//acyl-[acyl-carrier-protein] desaturase [EC:1.14.19.2 1.14.19.11 1.14.19.26]+ko00061//Fatty acid biosynthesis+ko01212//Fatty acid metabolism+ko01040//Biosynthesis of unsaturated fatty acids
LOC_Os10g37340	5.073	14.486	1.63611	3.15707e-12	GO:0009605//response to external stimulus;GO:0009991//response to extracellular stimulus;GO:0031669//cellular response to nutrient levels;GO:1901576//organic substance biosynthetic process;GO:0006950//response to stress;GO:1901566//organonitrogen compound biosynthetic process;GO:0006520//cellular amino acid metabolic process;GO:0009970//cellular response to sulfate starvation;GO:0071704//organic …	K01761//methionine-gamma-lyase [EC:4.4.1.11]+ko00450//Selenocompound metabolism+ko00270//Cysteine and methionine metabolism
LOC_Os07g32710	3.473	9.853	1.63438	1.02958e-15		K02184//formin 2
LOC_Os11g04710	1.906	5.466	1.632	3.24515e-10	GO:0032501//multicellular organismal process;GO:0065007//biological regulation;GO:0016125//sterol metabolic process;GO:1901362//organic cyclic compound biosynthetic process;GO:0010817//regulation of hormone levels;GO:0008152//metabolic process;GO:1901576//organic substance biosynthetic process;GO:0055114//oxidation-reduction process;GO:0006629//lipid metabolic process;GO:0009058//biosynthetic pro…	K09588//cytochrome P450 family 90 subfamily A polypeptide 1 [EC:1.14.-.-]+ko00905//Brassinosteroid biosynthesis+ko01110//Biosynthesis of secondary metabolites
LOC_Os02g55870	0.62	1.84	1.63138	2.63306e-07	GO:0008152//metabolic process;GO:0071944//cell periphery;GO:0005618//cell wall;GO:0016020//membrane;GO:0030312//external encapsulating structure;GO:0009505//plant-type cell wall;GO:0016798//hydrolase activity, acting on glycosyl bonds;GO:0016787//hydrolase activity;GO:0004566//beta-glucuronidase activity;GO:0003824//catalytic activity;GO:0004553//hydrolase activity, hydrolyzing O-glycosyl compoun…	K07964//heparanase [EC:3.2.1.166]+ko00531//Glycosaminoglycan degradation+ko01100//Metabolic pathways
LOC_Os05g10310	6.246	17.943	1.63125	6.98984e-27	GO:0042578//phosphoric ester hydrolase activity;GO:0003824//catalytic activity;GO:0016791//phosphatase activity;GO:0016788//hydrolase activity, acting on ester bonds;GO:0016787//hydrolase activity;GO:0003993//acid phosphatase activity;	K20728//vegetative storage protein 2+ko04016//MAPK signaling pathway - plant;K02866//large subunit ribosomal protein L10e+ko03010//Ribosome;K20728//vegetative storage protein 2+ko04016//MAPK signaling pathway - plant;K20728//vegetative storage protein 2+ko04016//MAPK signaling pathway - plant;K02866//large subunit ribosomal protein L10e+ko03010//Ribosome
[truncated: 552 more rows]

## Sheet: Table S3
Table S3. The common DEGs in osf3h04g and OsF3H04g gene editing line.
Gene ID	log2(osf3h04g/DJ)	log2(CR-04g/ZH11)	GO	Kegg Orthology	msu_description
LOC_Os03g02470	9.22912	8.49854			cDNA|expressed protein
[truncated: 99 more rows]

## Sheet: Table S4
Table S4. The primers used in this study.
[truncated: 24 more rows]
